# Supplementary material for: Differences in the Abundance of Auxin Homeostasis Proteins Suggest Their Central Roles for In Vitro Tissue Differentiation in Coffea arabica
Source: Plants (Basel). 2021 Nov 27;10(12):2607. doi: 10.3390/plants10122607 (PMC8708889; doi:10.3390/plants10122607)
Supplement: Supplementary file 1 [file plants-10-02607-s001.zip › Table S1.xlsx]

## Sheet: Hoja1
Table S1	Complete list of 2614 proteins identified for the three different tissues comparisons. The full characteristics of the identification through the Proteome Discoverer
Protein FDR Confidence: Combined	Accession	Description	Sequence	BLAST resultados	Exp. q-value: Combined	Sum PEP Score	Coverage [%]	# Peptides	# PSMs	# Unique Peptides	# Protein Groups	# AAs	MW [kDa]	calc. pI	Score Mascot: Mascot	# Peptides (by Search Engine): Mascot	# Razor Peptides	Abundance Ratio: (c) / (hi)	Abundance Ratio: (s) / (hi)	Abundance Ratio: (s) / (c)	Abundance Ratio (log2): (c) / (hi)	Abundance Ratio (log2): (s) / (hi)	Abundance Ratio (log2): (s) / (c)	Abundance Ratio P-Value: (c) / (hi)	Abundance Ratio P-Value: (s) / (hi)	Abundance Ratio P-Value: (s) / (c)	Abundance Ratio Adj. P-Value: (c) / (hi)	Abundance Ratio Adj. P-Value: (s) / (hi)	Abundance Ratio Adj. P-Value: (s) / (c)	Abundances (Grouped): hi	Abundances (Grouped): c	Abundances (Grouped): s	Abundances (Grouped) CV [%]: hi	Abundances (Grouped) CV [%]: c	Abundances (Grouped) CV [%]: s	Abundances (Normalized): F1: 127C, Sample, hi	Abundances (Normalized): F1: 128N, Sample, hi	Abundances (Normalized): F2: 127C, Sample, hi	Abundances (Normalized): F2: 128N, Sample, hi	Abundances (Normalized): F1: 128C, Sample, c	Abundances (Normalized): F1: 129N, Sample, c	Abundances (Normalized): F2: 128C, Sample, c	Abundances (Normalized): F2: 129N, Sample, c	Abundances (Normalized): F1: 129C, Sample, s	Abundances (Normalized): F1: 130N, Sample, s	Abundances (Normalized): F2: 129C, Sample, s	Abundances (Normalized): F2: 130N, Sample, s	Abundance: F1: 127C, Sample, hi	Abundance: F1: 128N, Sample, hi
High	CDP11220	pep chromosome:AUK_PRJEB4211_v1:3:9360558:9361555:1 gene:GSCOC_T00033327001 transcript:CDP11220	MAAAKSAIGTGKNDISELEPVKPADPHVIQIGQFVVEQCHHGQLLFVAVVGGFTWSGDGGYYYALIIENQDYEGATYLHKALVLETPSETKLIWHKK	---NA---	0	7.092	11	1	5	1	1	97	10.6	6.02	140	1	0	72.539	12.212	0.168	6.18	3.61	-2.57	2.39678e-06	0.000706764	0.0166217	6.4646e-05	0.00268969	0.113331	95	6890.9	1160.1	61.72	6.72	10.04	62.4	36.1	167.8	144.6	6647.4	6216.6	7179.4	7143.2	1073.5	1040.4	1253.7	1259.7	62.4	32
High	CDO98552	pep chromosome:AUK_PRJEB4211_v1:4:6677910:6678527:1 gene:GSCOC_T00022689001 transcript:CDO98552	MKNKFPLTSFLFFMIHTNLVFCSAAPEPLPPVLDVAGKLLRAGVNYYILPAIIIGNDIGGGLTLANGTCPPEVIQDNYEFTDGIPLIFSPLDPKKGIVRVSSDTNVKFSSTSKCAQSSVWKLSELDALTGKYFVGIGGVEGNPGPKTLSSWFKIETFDRSYKLKFCPSVCKFCKVICKDIGIVFQNGKRRLALSDDPFKVIFKRT	Kunitz trypsin inhibitor 5; Short=AtKTI5; AltName: Full=Kunitz trypsin inhibitor 2; Short=AtKTI2; Flags: Precursor	0	13.513	15	4	8	4	1	205	22.5	8.94	221	4	0	39.506	18.227	0.461	5.3	4.19	-1.12	1.49979e-08	3.37512e-07	0.0672518	1.16926e-06	5.16106e-06	0.300837	81.4	3216.5	1484	21.2	9.5	10.58	89.5	111.2	74.1	71.1	3641.7	3401.7	3041.5	2984.7	1584.3	1659.1	1325.4	1390.1	89.5	98.6
High	CDO97873	pep chromosome:AUK_PRJEB4211_v1:4:1236514:1237172:1 gene:GSCOC_T00021809001 transcript:CDO97873	MEMKPYQNIFVLVLFLVAFASNVVVMHGQTICKMSAQELMSCKPAVTPPEPSDPSSACCAALKHADVACLCSFKSSSWLPSLGIDPNLATQLPEKCKLPHPANC	Putative lipid-transfer protein DIR1; AltName: Full=Protein DEFECTIVE IN INDUCED RESISTANCE 1; Flags: Precursor	0	12.449	31	2	5	2	1	104	11.2	7.2	111	2	0	35.582	2.675	0.075	5.15	1.42	-3.73	0.00139672	0.999877	0.00185132	0.00662879	1	0.0216195	64.9	2308.6	173.6	52.96	26.47	64.81	39.3	41.8	115	100.6	3045.1	2857.4	1848.9	1865.2	4.9	167.6	179.8	195.8	39.3	37.1
High	CDO98560	pep chromosome:AUK_PRJEB4211_v1:4:6879574:6880218:1 gene:GSCOC_T00022699001 transcript:CDO98560	MKAPLVLFPLVLISIYTNSLFCQAAAESVQPAAVFGVDGKEVRTDLFYYIRPANNRGKDRGGGLGLRSIGNDSCPLVVIQETNELRDGLPLTFSPAVAPKDNVVRVSTDLNIQVAFPDTCNQPTVWRVDVSDKSEGRKFVNLGGVIGNPGPETLGNWFKIEKVGDHGNKYKLVYCPTVCSYCKVNCKNLGIVYQNGLRRLALSHRPFKVIFTRA	Miraculin; Short=MIR; Flags: Precursor	0	66.497	49	9	26	9	1	214	23.5	9	456	9	0	34.944	11.112	0.318	5.13	3.47	-1.65	2.73915e-05	0.00190467	0.172009	0.00036276	0.00612713	0.600084	161.9	5657.6	1799	68.19	54.35	52.95	296.7	359	88.4	85.4	9467.3	9390.7	3408.5	3379.6	2869	2896.9	1015	1128.1	296.7	318.4
High	CDP04088	pep chromosome:AUK_PRJEB4211_v1:9:4264624:4269334:1 gene:GSCOC_T00017380001 transcript:CDP04088	MVKQKQQLLPLFTFSCILFLLSTGYVLDAAGAEPSQALNRKFSLDGILRSEESEKYAVIFDAGSTGSRVHVFRFDPNMDLLRIGQDFEFYDKTNPGLSSYADDPQAAALSLKPLLLEGQAVVPEELRPQTPVKLGATAGLRMLKNGASDEILQAVRDLFKNESSLEYKAEWVSILEGSEEASYMWIAINYLSGRIGKPYPDTVATVDLGGGSVEMTYGISEETAANAPKCSNDGEAYVHEKYILGTKYHLYAYSYLYYGQLAARAEIFKVSRNSTNPCILDGYHGFYTYGGETYEASSPPSGSSFKKCRQVTLKALKLDAPCEHEKCTFNGTWGGGGGEGQENVYLASFFFDIAIEAGIISPNVPSASARPIDFKRAARLACVTKYEDVKTVFPNVYDE…	Apyrase; AltName: Full=ATP-diphosphatase; AltName: Full=ATP-diphosphohydrolase; AltName: Full=Adenosine diphosphatase; Short=ADPase	0	84.758	32	13	51	13	1	464	51.2	5.11	995	13	0	34.514	32.674	0.947	5.11	5.03	-0.08	6.07434e-06	7.10739e-06	0.999971	0.000124966	6.41356e-05	1	443	15290.5	14475.3	9.38	11.7	8.89	417.9	407.4	469.7	495.6	14201.1	13300	17033.6	16463.6	13145	13888.9	15086.4	16071.5	417.9	361.4
High	Q947C5	Non-symbiotic hemoglobin 1 OS=Gossypium hirsutum OX=3635 GN=HB1 PE=2 SV=1	MATYEGKVFTEEQEALVVKSWTVMKKKTAELGLKFFLKIFEIAPSAKKLFSFLRDSNVPLEQNTKLKPHAMSVFVMTCESAVQLRKAGKVTVRESNLKKLGATHFKYGVVDEHFEVTKFALLETIKEAVPDMWSDEMKNAWGEAYDRLVAAIKIEMKACSQAA	Non-symbiotic hemoglobin 1; AltName: Full=GOShi GLB1; Short=Hb1	0	10.502	7	1	12	1	1	163	18.4	8.88	284	1	0	31.308	25.497	0.814	4.97	4.67	-0.3	5.60229e-06	1.18683e-05	0.98719	0.000119589	9.86159e-05	1	134.6	4215.4	3433	34.34	18.96	18.57	92.7	101.9	180.7	177.9	5045.2	4929	3560.2	3605	4050.9	4031.4	2919.7	2923.4	92.7	90.4
High	CDP18509	pep supercontig:AUK_PRJEB4211_v1:scaffold_245:373789:374834:1 gene:GSCOC_T00005516001 transcript:CDP18509	MAAAKSAIGTGQTDISSLEPVKPADPRVIQIGQFVVEQAHHGKLLFVAVVGGFTWSVIGGNYYALIIENQDYEGATYLHKALVFETPDGVLTLIWHKK	Cysteine proteinase inhibitor 5; Short=AtCYS-5; Flags: Precursor	0	23.848	57	3	17	3	1	98	10.6	6.52	450	3	0	29.564	8.04	0.272	4.89	3.01	-1.88	6.39622e-12	5.24064e-09	3.58048e-06	4.4472e-09	2.04302e-07	0.000248049	319.8	9454.2	2571.1	17.79	11.61	16.8	237	292.2	350	352.1	8654.8	8306.1	10327.4	10387	2119.5	2302.5	2871	3014.1	237	259.2
High	CDP21770	pep supercontig:AUK_PRJEB4211_v1:scaffold_6482:1421:1916:-1 gene:GSCOC_T00007567001 transcript:CDP21770	MFLLVKLRCSHFNRWHLNMCFRDISNNRLAGTVRATNKTGLAITTVVQDPKAHY	Leucine-rich repeat protein 1; AltName: Full=Capsicum annuum-induced protein 23; Flags: Precursor	0	6.502	24	1	5	1	1	54	6.3	10.42	139	1	0	27.39	18.043	0.659	4.78	4.17	-0.6	3.217e-08	1.73626e-07	0.524229	2.19636e-06	3.00434e-06	1	77	2108.6	1389	11.84	21.36	13.78	80.5	86.6	73.6	65.5	1797.2	1670.4	2550.2	2474	1217.9	1241.7	1553.9	1570.7	80.5	76.8
High	CDP15759	pep chromosome:AUK_PRJEB4211_v1:1:16093506:16094654:1 gene:GSCOC_T00015822001 transcript:CDP15759	MVKLVAVILSVLSICSLAYSCAPSDSAALLAIKAALNEPYFGIFKSWTGPDCCKNWYGVSCDPEVHRVADINLRGESEDPIFEKAHRTGYMNGTISRAICQLNRLSSLTIADWKGISGTIPPCITSLPFLRIVDLIGNKLTGELPADIGRLSRLTVLNVADNRLTGRLPRSLTNLSSLMHLDLRNNLFRGTIPRNFGKLRMLSRALLSRNRLQGQIPNSISYIYRLSDLDLSLNRLSGTIPPSLGKMPVLATLNLDGNNISGTIPPTLLNSRIGTLNLSKNALEGNIPDTFGATSYFMVLDLSYNQLKGGIPKSTLSATFIGHFDVSHNHLCGPIPVGSPFDHLEASSFVYNDCLCGKPLREC	Receptor-like protein 33; Short=AtRLP33; Flags: Precursor	0	26.384	15	5	15	4	1	363	39.5	8.63	257	5	1	26.405	14.668	0.556	4.72	3.87	-0.85	0.000292337	0.00198357	0.837697	0.0020939	0.00636641	1	345.6	9126	5069.5	4.23	20.87	21.66	346.7	366.1	330.4	344.5	7663.9	7469.9	10934.9	10867	4195.6	4214.6	6192.2	6097.9	346.7	324.7
High	CDP10326	pep chromosome:AUK_PRJEB4211_v1:3:12846090:12847967:1 gene:GSCOC_T00031019001 transcript:CDP10326	MCSLTQNYLPVIDFTKKNLDPSSSFWPSTRQAVVRALEDYGCFIALYDEVTLELNEAIFRASEELFDLPTEIKVLNTSNTPSHGYVGQEPIIPLYEGLGIENATTLDGVEKFTNLLWPNGNHSFSETAFSYSKIVAELDQMVMRMVSEAYGIEKNYESLLGSMSYLLRLIKYRRPHENEKNLGIVPHTDKSFMSILQQDQVKGLEIKTKDGEWMVIDPSPFSFIVMAGDVCMAWTNGRIEPPHHRVVMTENAERYSLGLFTFIRDLIVQVPEELVDDEHPLQFKPFDHYKYIDYYYTDEGKRSKCPIRDYCGV	Probable 2-oxoglutarate-dependent dioxygenase AOP1.2	0	7.42	4	1	3	1	1	313	36	5	63	1	0	25.193	31.365	1.245	4.65	4.97	0.32	1.36002e-08	5.98706e-09	0.844471	1.08512e-06	2.32482e-07	1	13.2	332.3	413.7	47.16	10.3	13.18	9.2	9.2	18.8	23.5	360.5	370.9	306.3	306.1	475.9	456	375.4	367.7	9.2	8.2
High	CDO97325	pep chromosome:AUK_PRJEB4211_v1:2:18139893:18140381:-1 gene:GSCOC_T00014638001 transcript:CDO97325	MGSPKISLALVSFILLAIFWPSRAQNSQQDYVDAHNAARAQVGVGPIAWDDTVAAYAQNYANQRINDCNLVHSGGRYGENLAEGSGDLTGRDAVNLWVSEKQYYDYNSNTCAQGQQCGHYTQVVWRDSVRLGCARVQCTNNGWWFVICSYDPPGNYVGQRPY	Pathogenesis-related protein 1B; Short=PR-1B; Flags: Precursor	0	19.147	31	4	9	4	1	162	18	6.28	324	4	0	23.895	1.206	0.05	4.58	0.27	-4.31	5.10817e-06	0.998867	3.58548e-06	0.000112836	1	0.000248049	126.6	3025	152.6	10.46	27.72	56.91	125.4	127.8	101.9	127.8	2435.5	2262.4	3888.1	3757.1	156.7	213.7	28.4	148.7	125.4	113.4
High	CDP06109	pep chromosome:AUK_PRJEB4211_v1:5:24488443:24493141:1 gene:GSCOC_T00021495001 transcript:CDP06109	MADEVIVLDHEYSPPANRVRIALKEKGVAFVSKQEDLPNKKSSLLLEMNPVHKQIPVLIHNGKPICESLIIVEYIDEVWNDKSPLLPTDPHDRAHSKFWADYIDKKIYTSGRPVLTTKGETQAAAMKELISSLKILDAELGNKPYFGGKTFGITDIALIPYYSWFYALEKFGNLKMNEECPKLVAWGERCMQRESVSTTLHNLYETCDFLLEIRKKLGVEYKARLVTQGNQTQLAHRLANSVEISEGKQSEVLEVPAKKL	Probable glutathione S-transferase; AltName: Full=Auxin-induced protein PCNT107	0	8.956	8	2	4	1	1	260	29.5	7.15	85	2	0	22.77	51.079	2.243	4.51	5.67	1.17	4.14113e-12	4.12681e-12	1.66571e-07	3.74882e-09	4.17443e-10	2.23043e-05	23.3	530.8	1190.8	14.03	1.24	4.04	19.7	25.8	26	21.1	534.4	524.1	538.5	527.2	1131.5	1207.2	1174.6	1244.5	19.7	22.9
High	CDP12010	pep chromosome:AUK_PRJEB4211_v1:10:22677141:22680050:1 gene:GSCOC_T00035360001 transcript:CDP12010	MASTAGQVIRCKAAIAWEAGKPLVIEEVEVAPPQKMEVRLKILFTSLCHTDVYFWEAKGQHPVFPRILGHEASGIVESVGEGVTELQPGDHVLPVFTGECKECRHCKSEESNMCDLLRINTDRGVMLNDGKSRFSINGKPIYHFVGTSTFSEYTVVHVGCLAKINPLAPLDKVCVLSCGISTGLGATLNVAKPRRGSSVAVFGLGAVGLAAAEGARIAGASRIIGIDLLPDRFEQAKKFGVNEFVNPKDYPKPVQEVIAEMTDGGVDRSVECTGNVNAMISAFECVHDGWGVAVLVGVPHKDAVFQTHPMNVLNERTLKGTFFGNYKPRSDLPSVVEKYMNKELELEKFITHEVTFSEINKAFEYMLKGEGLRCLIRMEE	Alcohol dehydrogenase 1	0	151.802	64	19	68	15	1	380	41.5	6.47	1495	19	4	22.682	5.593	0.247	4.5	2.48	-2.02	5.67923e-12	2.42825e-08	3.81525e-07	4.25244e-09	6.67127e-07	4.69227e-05	1211.5	27479.1	6775.9	22.97	7.65	6.37	954.9	1026.7	1429.5	1519.4	30209.3	28772	26244.3	25716.4	7211.2	7130.9	6407.5	6438.5	954.9	910.7
High	CDP02150	pep chromosome:AUK_PRJEB4211_v1:7:1732454:1734933:1 gene:GSCOC_T00039453001 transcript:CDP02150	MALKSALFLLAFLLLVSTKVTSTEEDILTEHRHGAKSPAHAPVKPPLPSPKKAPVYPPKKAPAYPPKKAPTYPPKVAPIYPPKKAPAYPPKISPVHSPSKQNHGDCVKLCMEYCQKAESKRGCLRICVPCCDQYQCVPGRPEKKCVTWDKVWYHNDYVPCPTPKKY	---NA---	0	16.686	16	3	9	3	1	166	18.5	9.36	182	3	0	22.506	17.911	0.796	4.49	4.16	-0.33	1.46224e-07	4.01338e-07	0.927158	7.99632e-06	5.92097e-06	1	151.1	3400.4	2706.1	25.83	10.42	11.37	165.1	180.6	95.2	138.3	3773.6	3694.8	3129.4	3108.2	3025.3	2926.8	2502	2399.9	165.1	160.2
High	CDP09728	pep chromosome:AUK_PRJEB4211_v1:1:25246303:25249474:-1 gene:GSCOC_T00030175001 transcript:CDP09728	MAQTQEASKTAGKPIRCRAAVARKAGEPLVIEEITVAPPKARELRVRVLCSALCFSDIHFWRLEEPHGYYPRIFGHETVGVVESVGEGVEDVKVGDTVIPSFLAYCGECPDCISIKSNQCSKLRFELSPYIRDGTSRFSDAKGETIYHFGYTSGFSEYTVVDITHVTKVDPAIPPSKACLLGCGVSTGVGAAWKTADVEAGSTVAIFGLGVIGLAVAEGARLRGAKTIIGVDLNPDKVEIGKKFGITHFINPKELGGKPASEVILGMTDGLGADYCFECVGLPSLSQEAFACCRKGWGKTIILGVDKPDSKFILNSLVNNHSGKTITGVQYGGLKPNIDIAILGKRYLDKELQLDLFVTHEIKLEDINKAFKLLIEGKCLRTVIWMDQERASADGVTFN…	---NA---	0	30.376	22	7	12	1	1	401	43.3	6.71	95	7	0	22.011	30.662	1.393	4.46	4.94	0.48	1.06927e-10	2.49991e-11	0.1714	4.73105e-08	2.26208e-09	0.599035	56	1231.8	1715.9	10.41	26.2	24.42	48.5	55.4	56.6	62.7	950.9	997.4	1521.2	1566.1	1408.3	1367.9	2168.1	2090.7	48.5	49.1
High	CDP12304	pep chromosome:AUK_PRJEB4211_v1:4:27028142:27029877:-1 gene:GSCOC_T00035767001 transcript:CDP12304 description:Gibberellin-regulated protein 4 [Source:Projected from Arabidopsis thaliana (AT5G15230) UniProtKB/Swiss-Prot;Acc:P46690]	MAKILCLVILALIAISMVATTAMANAHIDRARYGEGSLKGYECGSQCKRRCQKTRASLNQPCQLFCNKCCAKCLCVPPGYSGNKQVCACYNNWKTKKGGPKCP	Gibberellin-regulated protein 4; AltName: Full=GAST1 protein homolog 4; Flags: Precursor	0	24.433	36	4	8	4	1	103	11.2	9.1	209	4	0	21.922	34.653	1.581	4.45	5.11	0.66	0.0278611	0.0106782	0.986413	0.0789749	0.027672	1	69.1	1515.1	2394.9	98.24	13.18	6.99	238.7	231	17.3	20.7	1703.2	1688.3	1337.9	1359.6	2560.9	2506	2214.1	2288.8	238.7	204.9
High	CDP03611	pep chromosome:AUK_PRJEB4211_v1:1:36432716:36433379:-1 gene:GSCOC_T00016031001 transcript:CDP03611	MASANFKLVISSIYPLVAVLLLLLSGGPTTCAAQGSFRPHALVVPVTKDASTLQYVAKVNQRTPSVSLNVVLDLGGRFLWVDCDKDYVSSTYRPVRCRSAQCSLAGNAGCGNCTGAPKPGCNTDTCALFPENTVTHTSTGGEVAQDALTLSSTDGSNPGPSATVPHCLLPSVSTRNSPFEEVIFGW	Probable aspartic proteinase GIP2; AltName: Full=Glucanase inhibitor protein 2; Short=NbGIP2; Flags: Precursor	0	4.292	5	1	4	1	1	186	19.4	7.17	161	1	0	21.915	2.825	0.129	4.45	1.5	-2.96	1.50152e-08	0.00280187	2.87506e-06	1.16926e-06	0.00855569	0.00021003	82.5	1809	233.2	16.33	14.22	13.8	68.9	73.6	92.6	96	1605.8	1604	2072	2037.9	208.6	211	273.3	257.7	68.9	65.3
High	CDP12362	pep chromosome:AUK_PRJEB4211_v1:4:28116734:28119460:-1 gene:GSCOC_T00035856001 transcript:CDP12362	MASKASSMVYFFVLIGLTLLFSNNVYATDYDNYINVYELTNGKISIKVTNYGATLLSVTVPDRNGKLDDVVLGYPTIEGYKNDSTYFGGLIGRVANRIGGAKFTLNGVEYNLPANDHGNTLHGGTRGFSDVIWEVTSYEKNSHVSLHYHSYDGEQGFPGAVDVYVTYMIIGGNRLGLKMEATPLDKATPINLASHSYWNLAGHGSGDIFSHDIQLFASKITPVDDKLIPTGQIVPVQGTPYDFLQSRSIGSKFNELPSGYDINYVVDYVPNGHVHKVAVVQEPKSGRKMELWSNKPGVQFYTSNMLNDTLGKDGATYRRYGGLALETQGFPDSVNHPNFPSQIVNPGENYLHVMVYRFTAHH	---NA---	0	26.103	20	4	10	4	1	362	39.9	6.64	99	4	0	21.746	9.75	0.448	4.44	3.29	-1.16	0.052906	0.20599	0.920617	0.136819	0.358478	1	150.4	3271.4	1466.8	98.51	87.74	87.32	42.5	42.1	534	532.5	1228.7	1178.2	8913.6	8710.1	558.9	524.5	3950	3849.5	42.5	37.3
High	CDP00178	pep chromosome:AUK_PRJEB4211_v1:11:31173044:31174596:-1 gene:GSCOC_T00032042001 transcript:CDP00178	MAGLHKKFAFFGLLKLWMLMPVSSRGPVYTPPNVERVTDQFRRISVSQGYNVFYGGSNVHLTNNGTSADLILDKSSGSGLVSKNRYYYGFFSAAMKLPAGFTSGIVTAFYLSNQDLFPHNHDEIDFELLGHEKRRQWVLQTNLYGNGSVGTGREEKFYLWFDPTQAFHEYSILWNNHHIVFLVDNVPVREVIHNGAISSAYPSKPMSAYVTIWDGSKWATHGGKYPVNYSYAPFATSLRGIEMEGCIRENSAACSKRSVSSLDPVDGQEFAKLSQLQTTGLEWARGKHMFYSYCQDKSRYKVLPPECTTAK	Probable xyloglucan endotransglucosylase/hydrolase protein 33; Short=At-XTH33; Short=XTH-33; Flags: Precursor	0	18.79	12	3	8	3	1	311	35.1	8.72	193	3	0	20.514	15.685	0.765	4.36	3.97	-0.39	3.14869e-08	1.04603e-07	0.776138	2.17371e-06	1.96515e-06	1	109.2	2240.9	1713.4	34.85	32.16	31.65	148.8	141.8	84.1	72.7	1696	1684.7	2961	3027.7	1293.9	1293	2271.5	2268.9	148.8	125.8
High	CDP03301	pep chromosome:AUK_PRJEB4211_v1:6:8052926:8055268:-1 gene:GSCOC_T00041840001 transcript:CDP03301	MFLLEWLVILASVNVIRSANAAVSDYAWASIRRVNQEGPYLGIVVPNSFEMSPLLQSPSFVPHDKLPHIDVAGRRFRIGKAENKRVIVVMTGLSMLNAGVSTELLLSLFKIKGILHIGIAENANPQLQIGDVTIPQYWAHTGLWNWQRYGDGPEDKLSLESNGDYTRSVGYLELSDFNSNVKDQNLLNNVWYQPEEVFPVDGYPEIRQHAFWIPVNELYFSLAEKLEGIKLEGCLNSTCLPRRPLVTRVERGISANVFVDNAAYREFVYTKFNATAIDMESAAIALVCLQQRTPFLTIRALSDLAGGGSSTSNAAAIFAPLAAHNAVVVLLKFISLLNP	Bark storage protein A; Flags: Precursor	0	8.916	13	3	3	3	1	339	37.6	6.3	27	3	0	20.082	6.65	0.331	4.33	2.73	-1.59	0.00495866	0.0949943	0.517781	0.0185075	0.185604	1	34.4	690.5	228.6	74.47	76.59	66.14	78.4	69.8	16.9	15.4	306.1	313.7	1541.7	1519.7	115.9	123.3	453.5	423.9	78.4	61.9
High	CDP16892	pep chromosome:AUK_PRJEB4211_v1:11:863891:864763:-1 gene:GSCOC_T00019478001 transcript:CDP16892	MAASLQPLFSAITFLLLIASLIGSSEAAGIVQYWGRGHSEPSSLAEFCRRQFATDVNIAFLKDFGSGHMPELNVIHPWPSAADIESCQNNQTKVFISLAGPSNLSSVEDAQEVAAYVWNTYLGGESSDRPFGTAVLDGVELHIHSGNPNYLDVLALALKGYPNVTLAVAGECPIPNLFLDPTIRTGVVDQVRVEFFDNPSCEFLPPNDTSLLFRSWDSWSDYPGVHKLYLGIPISSSIASEGGYIPPNELVYDVLPYLQNSPVYGGITVYPYFGHGVTFKSLLRSYARAV	Acidic endochitinase; Flags: Precursor	0	21.392	12	4	10	3	1	290	31.6	4.87	176	4	0	19.957	2.539	0.127	4.32	1.34	-2.97	5.34989e-09	0.00972018	3.18875e-07	5.26018e-07	0.025423	3.97204e-05	213.4	4259.1	541.9	15.57	5.2	34.09	234.8	264.8	194	193.8	4605.8	4144.3	4377	4131.8	646.2	672.5	296.6	454.5	234.8	234.9
High	CDP04489	pep chromosome:AUK_PRJEB4211_v1:9:585424:586136:-1 gene:GSCOC_T00017904001 transcript:CDP04489 description:Cysteine proteinase inhibitor 4 [Source:Projected from Arabidopsis thaliana (AT4G16500) UniProtKB/Swiss-Prot;Acc:Q84WT8]	MASAFPHLLLLTTLAAICLFSDVPSAALGGRPKDALVGGWSKADPKDPEVVENGKFAIDEHNKEAGTKLEFKTVVEAQEQVVAGTNYKIVIKALDGTASNLYEAIVWVKPWLKFKKLTSFRKLP	Cysteine proteinase inhibitor 1; Short=KCPI1; AltName: Full=Phytocystatin; Flags: Precursor	0	36.864	64	7	23	7	1	124	13.5	8.62	276	7	0	19.036	2.771	0.146	4.25	1.47	-2.78	1e-15	1.10453e-06	1.24642e-10	1.9468e-12	1.36004e-05	2.42204e-07	648.1	12337.3	1795.8	8.88	6.94	2.9	688.3	726.1	608.9	610.2	13523.6	12865.2	11831.1	11710.4	1784.2	1848.9	1724.6	1807.5	688.3	644.1
High	CDP18241	pep chromosome:AUK_PRJEB4211_v1:2:48456384:48461024:-1 gene:GSCOC_T00011802001 transcript:CDP18241	MGLMSEAFSQTLIPVCALIGILFALVQWFLVSRIRVASSGPDSYEDQLIEEDDEQVEGIDSAEVVNKKCAEIQNAISVGATSFLFTEYKYLGIFMFVFGVIIFIFLGSVKGFSTKSEPCTYNEGNLCKPALANAIFSTIAFWLGSLTSVLSGFLGMKIATFANARTTLEARKGIGKAFITAFRSGAVMGFLLAANGLLVLYVSINLFKLYYEDDWEGLYESITGYGLGGSSMALFGRVGGGIYTKAADVGADLVGKVEKNIPEDDPRNPAVIADNVGDNVGDIAGMGSDLFGSYAESSCAALFVASISSFGIHHDYAAMSYPLIISSVGIIVCLITTVIATDVVEIKTVSEIEPSLKRQLLISTVLMTVGIAGVSFLVLPSKFTLFDFGADKVVKNWHL…	---NA---	0	41.282	13	6	16	1	1	780	82	5.25	375	6	0	17.954	16.705	0.93	4.17	4.06	-0.1	0.000117065	0.000146718	0.999907	0.00103592	0.000726081	1	10.3	185.7	172.8	28.5	70.91	74.72	11.3	15.4	8.2	9.5	84.4	95.4	387	361.5	81.5	78.3	379.1	366	11.3	13.7
High	CDO99717	pep chromosome:AUK_PRJEB4211_v1:2:9542111:9543889:-1 gene:GSCOC_T00029390001 transcript:CDO99717	MANTYQSLLDTPKKNTGFKVLFLVLFLAAILGAIAIVSITILKSTQTVISSSPRSHLCSKAHDQPSCMALVSELTSAGLLQSSDVELLQMLLAKSSSRIQETIELTNNINRRINDQKGQAALADCLELMDISMDRVMDSMVSLGSQTANSHSDVHSWLSSVLTNHVTCLDGLNGLARPAMEPLMKELISRARTSLAMLVAIAPSEEEMIQEPLNGDFPSWVTHKDRRLLQSSAKNINANVVVAQDGSGNYKTVQEAVTAAPNNPQTRYVIYVKKGTYKEKVDIGKSKKNLMLVGDGMDLTIITGSLNVVDGTTTFQSATVAAVADGFIGQDIWFQNTAGPQKQQAVALRVGADQSVINRCKIDAFQDTLYAHSLRQFYRDCYITGTVDYIFGDAAVVFQ…	Pectinesterase/pectinesterase inhibitor 18; AltName: Full=AtPMEpcrA; Contains: Pectinesterase inhibitor 18; AltName: Full=Pectin methylesterase inhibitor 18; Contains: Bifunctional pectinesterase 18/rRNA N-glycosylase; Short=PE 18; AltName: Full=Pectin methylesterase 18; AltName: Full=Pectin methylesterase 4; Short=AtPME4; AltName: Full=Ribosome-inactivating protein; Flags: Precursor	0	90.782	35	17	49	14	1	533	57.8	7.93	787	17	4	16.66	13.873	0.833	4.06	3.79	-0.26	4.14931e-09	1.08782e-08	0.877277	4.43577e-07	3.35902e-07	1	589.8	9825.5	8181.9	11.82	29.23	30.65	617.8	678.2	515.6	563	13039.6	12591.2	7622.9	7667.3	10627.3	10902.2	6299.2	6205.9	617.8	601.6
High	CDP14520	pep chromosome:AUK_PRJEB4211_v1:9:21917734:21921118:1 gene:GSCOC_T00041034001 transcript:CDP14520	MPAVVDLACLLCLLLLISSSSTATACDRCVHSTKAAFFNKASALQSGACGYGSMATSFNAGHLAAAVPAIYKDGAGCGACFQIRCKNTQLCTKQGAKVIVTDLNKNNNETDFVLSSRAFRAMAVQGKDQDILKLGILDVEYKRVPCDYRRNLGIRVEESSQKRSNYLAIKFLYQGGQTEIVGVDVAQVDSPNWTFMSRNYGAVWDSSRVPSGALQLRVVVTAGYDGKFVWAKNALPADWKNGMVYDSGVQITDVAQEGCSPCDDGSWPATARLI	Expansin-like A1; Short=At-EXPL1; Short=AtEXLA1; Short=AtEXPL1; AltName: Full=Ath-ExpBeta-2.1; Flags: Precursor	0	12.566	14	5	10	5	1	274	29.5	8.07	149	5	0	16.607	8.084	0.487	4.05	3.02	-1.04	4.58591e-06	0.000146849	0.254561	0.00010553	0.000726264	0.758896	262.7	4362.8	2123.7	13.99	21.39	21.69	224.1	242.2	285	303.7	3690.3	3601.2	5420	5157.8	1763.4	1754.1	2586.2	2557.7	224.1	214.8
High	CDO97476	pep chromosome:AUK_PRJEB4211_v1:2:19322015:19326721:-1 gene:GSCOC_T00014827001 transcript:CDO97476	MYKISTSSSIMHCPALLEARSRLKAQMETSVVSAAPDYFTRTRVSRNVNMEKLQNNYLFPEISSRELEHMKKYPHAKVISLGIGDTTEPLPEIVALSMANYARCLSTPEGYKGYGLEQGNKELRKAIAETLYKDLQIKDTEVFISDGSQSEISRLQLLLGSKVTIAVQDPSFPAYIDSGVIMGQAGEFDHASGRYQKIEYMKCGPENNFFPDLHETPRTDIIFFCSPNNPTGQAASREQLEQLVEFAQENGSIIVYDSAYAAFVSDESPRSIYEIPGARKVAIEVSSFSKIAGFTGVRLGWTVVPDELLYSDGFPVLHDFNRIICTCFNGASNVAQAGGLACLSTEGLAAVHSAVDHYKENARILVDSFTSLGLRVYGGVNAPYVWVHFPGSKSWDVFS…	Aminotransferase ALD1, chloroplastic; AltName: Full=AGD2-like defense response protein 1; Flags: Precursor	0	17.8	7	2	5	2	1	446	49.2	5.97	134	2	0	16.601	2.583	0.156	4.05	1.37	-2.68	5.75074e-08	0.00761067	8.6597e-06	3.68274e-06	0.0204367	0.000431475	43.8	727.8	113.3	8.39	8.67	5.38	49.1	44	40.1	43.7	700.9	678.5	822.2	755.8	120.4	110.7	106.4	115.9	49.1	39
High	CDP15781	pep chromosome:AUK_PRJEB4211_v1:6:25707580:25710211:-1 gene:GSCOC_T00015869001 transcript:CDP15781	MDFYRYQYRVGHLLEDGSYVWSKTYYFRASPYPGQESLQRVIIFGDMGKAERDGSNEYANYQPGSLNTTDQLIRDLPNIAIVFLIGDLPYANGYISQWDQFTAQVAAITSTKAFMIASGNHERDWLNSGSFFNVQDSGGECGVPAETYYYVPAENRAKFWYQTDYGMFRFCIIDSEHDWREGSEQYQFIEKCLASVDRKHQPWLIFAAHRVLGYSSNDWYAKDGSFEEPEGRAHLQKLWQKYKVDIAFFGHVHNYERTCPIYQNQCVKDGKSHYSGVVNGTIHVIVGGGGSHLSQFTPTNTFWSLYKDYDRGFVKLTAFNRSSLLFEYKKSRDGEVYDSFTISRDYRDVLACVHDGCEFTTLAS	Probable inactive purple acid phosphatase 27; Flags: Precursor	0	52.825	35	13	26	12	1	364	42	6.15	411	13	1	16.315	2.751	0.169	4.03	1.46	-2.57	7.45408e-08	0.00654428	2.30477e-05	4.3982e-06	0.0178403	0.000973613	620.7	10127.1	1707.8	31.81	12.11	6.42	820.3	826.6	465.8	469.7	9324.3	8751.6	11214.3	10999	1580.1	1652.5	1823.1	1764.9	820.3	733.2
High	CDP12588	pep chromosome:AUK_PRJEB4211_v1:9:9260541:9262124:1 gene:GSCOC_T00036251001 transcript:CDP12588	MEKKHISLVLTFISLFLLTSSTHSYLILDNFIECFSHDFPLSTTSLDVIHTPSNSSYSSLLESPIRNLRFLTSTTPKPLAVITPSTYDHVQATVTCCRKHGVQIRTRSGGHDYEGLSYTSNVPFIILDLVNLRAIDVNSEENSAWVQSGASLGELYYWISQKSPSHGFPAGICPTIGVGGHFSGGGYGTISRKYGLAADNVLDALIVNADGQILDRKSMGEDLFWAIRGGGGSSFGVIVAWKIKISYVPPLVTVFSPARTLDQGATNLVYKWQQIANKLPEDLFIRLVIVADGEGKNRTIRVTFNSLFLGRTDQLLEVMKESFPELGLIKEDCREMSWIETILFFDNRNGQTIDGLKNRVPDPKGFFKATSDYVEEPLSQAALEKLWKWSLEEERPALI…	---NA---	0	13.131	10	3	7	2	1	527	59.5	7.59	102	3	0	15.935	12.758	0.801	3.99	3.67	-0.32	0.0011759	0.00241981	0.994046	0.00578385	0.00754554	1	62.1	989.6	792.3	92.35	11.74	8.04	21.8	23.2	166.1	209.9	903.6	879.4	1100.4	1083.8	759.4	738.5	826.7	879.3	21.8	20.6
High	CDP07624	pep chromosome:AUK_PRJEB4211_v1:2:24029375:24030240:1 gene:GSCOC_T00024938001 transcript:CDP07624	MVCPPAIHLDPNLYENPLEFNPWRWEGKELHVGSKSFMAFAGGTRLCVGADYAKVQMSLFLHYLVTQYTWRVLPGAERIRTPTGIQFPKGLPIEISKNK	Cytochrome P450 708A2; AltName: Full=Thalianol hydroxylase; Short=AtTHAH	0	21.644	45	6	21	6	1	99	11.3	8.88	142	6	0	15.51	29.565	1.906	3.96	4.89	0.93	2.83349e-05	2.35939e-06	0.432147	0.000371552	2.52942e-05	1	176.9	2743.1	5229	48.16	43.98	38.69	254.7	280.9	100.2	122.8	4091.5	4101.4	1839.2	1834.3	7738	7259.2	3766.6	3725.2	254.7	249.2
High	CDP09754	pep chromosome:AUK_PRJEB4211_v1:8:29484185:29486922:-1 gene:GSCOC_T00030208001 transcript:CDP09754	MKLKLFVHRLSQPSRAVLIFCKLNKIEFEEVQIDLSKGEHLSPEFKEINPMHKVPAMEVDGGFKLFESHAILRFLACASPGVADHWYPADLFKRAEINSVLDWHHANLRHGSAGLVFHSKLAPLFGLPSDVQAAAECEKVLLASLAKIESFWLKEEEQFLLGNSKPSIADLSLVCETMQLEALDEKVRQRLLDPHEKVRKWVDDTRNAMQPYFGEIHGVLFQLKDKLKEMESDE	Glutathione S-transferase T1; Short=AtGSTT1; AltName: Full=GST class-theta member 1; AltName: Full=Glutathione S-transferase 10	0	31.479	24	5	29	4	1	234	26.7	6.32	399	5	0	15.062	21.201	1.408	3.91	4.41	0.49	0.00471611	0.00155016	0.976075	0.0176972	0.00516355	1	182	2742	3859.5	30.54	49.23	43.38	134.7	143	231.8	244	1790.3	1650.1	4341.2	4199.5	2600.1	2655.2	5610	5941	134.7	126.8
High	CDP12596	pep chromosome:AUK_PRJEB4211_v1:9:8967672:8969279:1 gene:GSCOC_T00036268001 transcript:CDP12596	MVTSGGSLFSHLSFLILALAILQADASRIHDDYLKCLQSQNSNSVSTIAYTPRNTSYSSILQSTEQNLRPASTSLFKPTLILTPLHSSQIQAAIRCARKHEIQIRVRSGGHDYEGLSYASTSPFVIVDLRNISSISVDRENRTAWVEAGATLGQLYYKIGETSRELAFVAGACPTVGVGGHFSGGGYSMLSRKFGLSVDHIIDAKIIDVNGQILDRRSMGEDLFWAIRGGGGASFGIIIAWKVSLVSVPQKVTVFNLTKTSDQNATQLVHQWQHIADKIDENLLIRLFITSSNSPQTGKKSIVVSFTSLFLGGVDQLLSLMQKSFPELGLAKEDCIEMSWVESTVYFANIPGAASVEVLLDRNSSKSYFKGKSDYVKKPISVKGLEGLWKRLFAEEEED…	Berberine bridge enzyme-like 18; Short=AtBBE-like 18; Flags: Precursor	0	13.705	7	3	8	2	1	535	59.6	8.95	144	3	0	13.472	10.024	0.744	3.75	3.33	-0.43	0.000134741	0.000446135	0.950494	0.00116171	0.00186529	1	181.2	2441.6	1816.8	27.15	54.84	44.14	147.9	138.4	222.1	237.8	4198	3984.6	1423.3	1496.1	2621.4	2844.2	1259.2	1196.5	147.9	122.8
High	CDP19854	pep supercontig:AUK_PRJEB4211_v1:scaffold_731:12154:13359:-1 gene:GSCOC_T00010670001 transcript:CDP19854	MENCTEIFDVIVVGAGVMGSSTAYQTAKRGKKTLLLEQFDFLHHRGSSHGESRTIRATYTKDFYPKMVLESAKLWEEAEEEAGYKVYFKTSQIDLGSSYDKSLQAIISSCQKNRVPVQVLNHNQVSEEFKFQLTEDWIGAVIEHGGVIRPTKAVSMFQMLAMKNGASLRDNMEVVDIKKDPSKDAILVSTRNGQMFWAKKCVVTVGAWMKKLVKEVAGLTLPIQPQEITVYYWKIEQGHEAEFTIESGFPTFSSYGEAHIFGTPSLEFPGLLKILVDGGHPCDPDKRTWSASPDTLSATKEWIQSKFGGLVDSSEPVLTQSCMYSMTPDKDYVIDYLDGEFGKDVVVAGGFSGHGFKMAPIIGRILADLAIDMQAKDVDMKHFNIKRFEGNSEGNHEDF…	Probable sarcosine oxidase	0	66.659	38	12	26	10	1	401	44.7	5.6	445	12	1	13.464	10.264	0.762	3.75	3.36	-0.39	4.27687e-10	2.15551e-09	0.442775	1.09555e-07	9.66354e-08	1	334.7	4505.8	3435	9.36	14.9	12.24	296.4	331.2	338.1	372.8	4002.8	3927.6	5197.6	5072	3102	3066.5	3803.9	3826	296.4	293.8
High	CDP14907	pep chromosome:AUK_PRJEB4211_v1:4:25975498:25976651:1 gene:GSCOC_T00042395001 transcript:CDP14907	MQNMASYNVIHLVIWLTFLSLVQLPMRSHCADPGPLQDFCVADLNSPVLVNGFPCKNPANVTSNDFFFDGLQKLGTVFDALNVNLTEVDVFAFPALNTLGMSMNRVQFHPGGENPPHIHPRATELSLVTEGKLLVGWVSTAYVLNWKILTAGQVFVIPPGLVHFQLNVGKGNALFYAFFNSQNPGISKLAPALFASTPLIPDPVLTTAFNVNKTIIDLIKSRASVLIP	Germin-like protein 3-6; Flags: Precursor	0	11.489	13	2	4	2	1	228	24.8	7.09	100	2	0	13.435	15.996	1.191	3.75	4	0.25	0.0178955	0.0103922	0.998241	0.054436	0.0270113	1	57.3	769.8	916.5	101.77	16.62	10.56	203.1	254.3	16.2	15.9	912.4	863.4	686.4	649.9	952.6	1084	881.8	864.1	203.1	225.6
High	CDO99592	pep chromosome:AUK_PRJEB4211_v1:2:11118727:11121064:-1 gene:GSCOC_T00029229001 transcript:CDO99592	MASLSTSTACTSATTLSSLHYSPFLAKTFHISTTKKRNHHFKVSCQATNGERNASRRNVLIGLGGLYGAASLAADPFALAAPIQAPDVSKCGPADLPSGATPTNCCPPPATTIVDFKLPAPSNTLRVRPAAHLVDEAYIAKFQRAVQLMKALPDDDPRSFKQQANVHCAYCDGAYDQVGFPNLELQVHNSWLFLPFHRYYLYFYERILGKLINDPTFAMPFWNWDAQGGMRLPDIYTDPTSPLYDTLRDGSHQPPTMIDLDFNGTDSNISDSQQLSQNYTIMYRQMVSNSRTPRLFFGSPYRAGDDPDPGAGQLENIPHGPVHVWTGDRTQPNLEDMGNFYSAGRDPIFYAHHSNIDRMWTLWKTLGGRRQDITDTDWLNASFVFYDENAQMVRVRVRD…	Polyphenol oxidase, chloroplastic; Short=PPO; AltName: Full=Catechol oxidase; Flags: Precursor	0	88.815	24	10	37	10	1	580	65.1	7.17	753	10	0	13.418	5.085	0.379	3.75	2.35	-1.4	8.449e-08	3.32086e-05	0.00520395	4.92394e-06	0.00021241	0.047835	484.8	6505.5	2465.6	23.55	27.04	28.74	373.9	424.2	554.1	627.7	5142.7	5086.1	8229.6	8253.8	1931.8	1858.3	3152.4	3146.8	373.9	376.3
High	CDP14600	pep supercontig:AUK_PRJEB4211_v1:scaffold_88:1122561:1126119:1 gene:GSCOC_T00041159001 transcript:CDP14600	MAAAGFLVTLAIVLVSSSSISTAFDNDPLQDFCVAVPDASAAVFVNGKICKNPKLVTTDDFVASGFNTPASINNSLGFGVKVADVNLIPGLNTLGLTVLRVDFEPDGVVPPHTHPRATEAIVVLEGTIYAGFVTSNPTDNTKNKLFAKILKPGDVFVFPIGLVHFQRNVGKTKGMAIVAFNSQNPGVITIGNAVFGSEPHIAPEVLTKSFQVDKKVIEYLESKF	Germin-like protein subfamily 1 member 7; Flags: Precursor	0	88.158	57	10	59	9	1	224	23.7	6.54	659	10	1	13.286	2.372	0.179	3.73	1.25	-2.49	9.27239e-07	0.0467253	0.000115863	3.6248e-05	0.100403	0.00319805	1399.3	18591.9	3319.4	37.74	25.81	33.34	1913.8	2000	966.5	1023.1	23932.1	23022.7	15013.8	14826.8	4443.7	4421	2492.3	2401.5	1913.8	1774
High	CDO97229	pep chromosome:AUK_PRJEB4211_v1:2:17445818:17446507:-1 gene:GSCOC_T00014498001 transcript:CDO97229	MGQRKTFLLSSLAAILLAALIQGSHAVEYTVTNSAASTPGGARFERDIGVQYTKQTLDSATNFIWRIFQENAPADRKNVQRVDMFVDDMDGVAYTSNDQIHVSARYIQGYSGDVRSEITGVLYHEMTHVWQWNGNGQAPGGLIEGIADYVRLKAGYAPSHWVKPGQGDRWDQGYDVTARFLDYCNSLKNGFVAQLNNKMRNGYSNDYFVELLGKSVDQLWNDYKAKFNN	Basic secretory protease; AltName: Full=Boswellia basic secretory protease; Short=BBSP	0	10.583	21	4	7	4	1	229	25.7	6.7	91	4	0	13.12	2.297	0.175	3.71	1.2	-2.51	2.45143e-08	0.00709037	4.74134e-06	1.72914e-06	0.0192016	0.000250363	117.1	1536.5	269	14.54	33.6	22.69	127	132.9	96.4	108	2159	2014.2	1172.1	1129.3	317.3	344.9	219.9	228	127	117.9
High	CDP09079	pep chromosome:AUK_PRJEB4211_v1:1:31555634:31558233:1 gene:GSCOC_T00028271001 transcript:CDP09079	MKPWSNALFLIILALLGFAISFANAETHYHDFVVEAKPVKRLCRTHNIITVNKKFPGPTLTVRNGDTLVIKALNKARYNVTLHWHGIRQMRTPWADGPEYVTQCPIQPGATYTYRFTIEDQEGTLWWHAHSKWLRATVYGALVILPKLGSPYPFPKPRHEVPIILGEWWDRDIISVLRQALFTGAAPNVSDAYTINGQPGDLYRCSSKGTFKVSVNSGDRVLLRVINAALNQQLFFTIANHQLTVVGADAIYHKPFATRVIMLGPGQTTDVLLTANQRPARYYMAARAYASARGAPFDNTTTTAVLEYNTARGGSSSTSRPLLPRLPAFNDTATATAFENGLRSIPSEAAKVPTKIDHSLFFTVGLGFVNCNPGPRCQGPNNTRFAASMNNVSFVLPRR…	Laccase-3; AltName: Full=Benzenediol:oxygen oxidoreductase 3; AltName: Full=Diphenol oxidase 3; AltName: Full=Urishiol oxidase 3; Flags: Precursor	0	26.95	15	6	9	6	1	569	63.2	9.41	161	6	0	12.831	6.34	0.494	3.68	2.66	-1.02	0.0070772	0.0632677	0.78035	0.0251881	0.130737	1	176.3	2262.5	1117.9	5.89	80.12	82.04	158.1	174.2	180.6	178.5	5432.4	5239.6	954.6	976.9	2665.8	2711.3	441.6	468.8	158.1	154.5
High	CDP02145	pep chromosome:AUK_PRJEB4211_v1:7:1698099:1703845:1 gene:GSCOC_T00039446001 transcript:CDP02145	MTLVDKLLFLIIHFVDKLGIWHRLPVFLGLIYLSIRRHLHQEYNLFNVGKTPAGVRFNPADFPFRTADGEFNDPFNEGAGSEDSFFGRNVLPVDQRNKLLKPNPMVVATKLLARRNLKDTGKQFNMIAASWIQFMIHDWIDHLEDTQQIELTAPAEVASQCPLKSFKFYKTKEVPTGFYEIKTGHLNRRTPWWDGSAIYGSDEKSLKKVRTFKDGKLKISKDGLLLHEDDDGRAISGDVRNSWAGVSLLQALFVMEHNSVCDALKKEYPELGDEELYRHARLVTAAVIAKIHTIDWTVELLKTDTLHAAMRANWYGLLGKKFKDTFGHVGGAILSGLVGLKKPENHGVPYSLTEEFVSVYRMHSLLPDDLLLRDINAATGPNKSPPLSKQIAMPNLIGI…	Alpha-dioxygenase 2; Short=Alpha DOX2; AltName: Full=Fatty acid dioxygenase AlphaDOX2; Flags: Precursor	0	105.643	23	17	62	17	1	613	69.7	7.5	1073	17	0	12.725	12.426	0.977	3.67	3.64	-0.03	4.60042e-05	5.3265e-05	0.999985	0.000531204	0.000313456	1	1036.1	13183.6	12874.6	38.59	38.92	40.68	1389.3	1603.9	744.7	772.7	18957.2	18619.6	9300.4	9334.7	18562.4	18461.8	8978.2	8758	1389.3	1422.7
High	CDP18238	pep chromosome:AUK_PRJEB4211_v1:2:48434398:48435808:1 gene:GSCOC_T00011799001 transcript:CDP18238	MASEVAEKERKILVAVDEGEESSYALSWCLSNIVNENSKDTLVLVYARPPRAVYSTLDGSGEEGRLPGYLFSSDILASMEKYSHEVAECVLEKAHRICKDFNAIKVETKVEHGDPRDVICQVAEKLNVDLVVMGSHGYGLIKRAFLGSVSHHCAQNLKCPVLIVKKPKSNDGN	Universal stress protein PHOS34; AltName: Full=Phosphorylated protein of 34 kDa; Short=AtPHOS34; Flags: Precursor	0	7.474	29	2	2	2	1	173	19	6.28	0	2	0	12.531	4.145	0.331	3.65	2.05	-1.6	0.0980092	0.537902	0.758916	0.228782	0.802743	1	62.7	785.4	259.8	87.45	95.7	100.58	157.7	169.6	20.6	24.9	2582.9	2554.4	239.6	241.5	1015.9	973.6	68.4	69.3	157.7	150.4
High	CDP11514	pep chromosome:AUK_PRJEB4211_v1:10:26974329:26977715:1 gene:GSCOC_T00033803001 transcript:CDP11514	MALAFLCLVILLSSTLNSWQVVKVAGGSTPNYRDALAKSLLFFQGQRSGRLPRTQQIDWRSASGLSDGSFARVDLTGGYYDAGDNVKFNFPMAFTTTMLSWSTLEYGKKMGPELQSARAAIRWATDYLLKCALATPGKLYVGVGDPNSDHRCWERPEDMDTVRSVYSVSPSNPGSDVAGETAAALAAASLVFRTVDPAYSRLLLRTAQKVMQFAIQYRGSYSDSLGSAVCPFYCSYSGYKDELLWGAAWLFRATNNVYYFNFIRSLGANDGTDIFSWDNKYAGARVLLSRRSLLNRDMAFEPYRQQAEDFVCRILPNSPYSSTQYTPGGLMFKLSQSNLQYVTSITFLLTTYSKYMAATKHTFNCGNLLVTSNTLRSLSKRQVDYILGENPLKMSYMVG…	---NA---	0	79.416	33	13	30	13	1	492	54.5	8.48	748	13	0	12.38	10.892	0.88	3.63	3.45	-0.18	5.03553e-07	9.15079e-07	0.991027	2.22799e-05	1.1986e-05	1	454.3	5624.5	4948.2	20.46	43.72	44.45	523.7	565	372.6	394.1	3821.6	3656.6	8277.9	8308.4	3334.9	3300.2	7585.8	7341.9	523.7	501.2
High	CDP01879	pep chromosome:AUK_PRJEB4211_v1:7:8047000:8057701:1 gene:GSCOC_T00037055001 transcript:CDP01879	MGNLAASVSTLLCLVSLLYLHGRVGGSGYMKYNTGGGIVGGKLNVHLVPHSHDDVGWLKTIDQYYVGSNNSIQGACVENVLDSVITSLGRDPNRKFVYVEMAFFSRWWETQSSEIKQQVRRLVDSGQLEFINGGWCMHDEAATHYIDMIDQTTLGHQLIKSQFNKTPRAGWQIDPFGHSAVEAYLLGAELGFDSVHFARIDYQDRAKRKVDKTLEVIWHGSRTFGSSSQIFANAFPVHYSPPNGFHFEVDDDFVPVQDNPLLFDFNVERRVADFVSAAMAQANVTRTNHVMWTMGDDFQYQYAESWFKQMDKLIHYVNKDGRVNALYSTPSIYTDAKHAANETWPLKTADYFPYADSANAYWTGYFTSRPAFKRYVRTLSGYYLAARQLEFLIGWRSKG…	Alpha-mannosidase; Short=JBM; Short=Jbalpha-man; Contains: Alpha-mannosidase, heavy subunit; Contains: Alpha-mannosidase, light subunit	0	76.034	22	13	32	13	1	1009	112.5	6.89	482	13	0	12.178	3.107	0.255	3.61	1.64	-1.97	0.000254696	0.104916	0.0410053	0.00186127	0.201871	0.210909	302.2	3680.6	939	57.79	44.92	55.83	166.3	179.7	508.3	529.3	2512.2	2366.5	5673.3	5392.5	560	549.1	1609.7	1574.4	166.3	159.4
High	CDP12234	pep chromosome:AUK_PRJEB4211_v1:8:31266646:31269358:1 gene:GSCOC_T00035659001 transcript:CDP12234	MTSCLPKFTIKLLLILCFSLSSSHAFTTRDYSDALEKSILFFEGQRSGKLPSNQRLSWRGDSALSDGSGYHVDLAGGYYDAGDNVKFGLPMAFTTTLFAWSIIEFGSSMHNQLENAKAAVRWGADYLLKAATATPATLYAQVGDPNIDHRCWERPEDMDTPRNVYKVTSQNPGSDVAAETAAALAAASIVFKDSDPHYSTKLLHTAMEVFDFADRHRGSYSDSLNSVVCPFYCSYSGYQDELLWGASWLHTASENSSYLAYIQSNGHTLGADNDDYSFSWDDKRPGTKVLLAKGFLEKSTQEFQLYKAHSDSYICSLIPGMPNFQAQYTPGGLLYKQSESNLQYVTSSSFLLLTYAKYLRSNGGVAACGVSTITADKIIETAKRQVDYILGDNPAKMSY…	Endoglucanase 1; AltName: Full=Abscission cellulase 1; AltName: Full=Endo-1,4-beta-glucanase 1; Flags: Precursor	0	22.432	17	6	9	6	1	495	54.5	6.16	111	6	0	11.691	0.632	0.054	3.55	-0.66	-4.21	7.79539e-07	0.387025	7.59287e-08	3.08457e-05	0.614394	1.17099e-05	362.4	4236.5	229.1	40.83	21.22	45.14	516.7	511.5	234.9	256.7	3591.5	3453.7	5196.5	4997.4	118.5	215.2	243.9	380.1	516.7	453.7
High	CDP05192	pep chromosome:AUK_PRJEB4211_v1:2:2323062:2327844:1 gene:GSCOC_T00020155001 transcript:CDP05192	MENLTLSGLLIKVAAKFPSRRAISVPGRFDLSHARLHQLVERTATRLVAAGVQPGDVIALTFPNSVEFVIAFLAVIRARATAAPLNPAYTADEFQFYLSDSDSKILLTSKQGSAPAQAAASKLNIPHVTVALPDADSDVALSSSLSQYESDPEPDPNLSSKLINDPSDISLFLHTSGTTSRPKGVPLTQLNLVSSVNNIKSVYRITESDSTVIVLPLFHVHGLLAGLLSSVGAGGAVTLPAAGRFSASTFWSDMKNYNATWYTAVPTIHQIILDRHLNSPEPVYPRLRFIRSCSAALAPSILARLEEAFGAPVLEAYAMTEASHLMASNPLPQDGPHVPGSVGKPVGQEMAILDENGKPQEANANGEVCIRGPNVTKGYKNNPEANKSAFQFGWFHTGD…	Oxalate--CoA ligase; AltName: Full=4-coumarate--CoA ligase isoform 8; Short=At4CL8; AltName: Full=4-coumarate--CoA ligase-like 10; AltName: Full=Acyl-activating enzyme 3; AltName: Full=Adenosine monophosphate binding protein 3; Short=AtMPBP3; AltName: Full=Oxalyl-CoA synthetase	0	76.614	34	10	21	10	1	529	56.6	6.93	406	10	0	11.576	10.016	0.865	3.53	3.32	-0.21	0.0235355	0.0342582	0.999624	0.0686286	0.0766709	1	250.3	2897.4	2507	53.46	84.32	81.9	391.7	432.5	145	159.9	7380.6	7323.4	1146	1146.3	6263.7	5983.1	1050.4	1037.3	391.7	383.6
High	CDP10698	pep chromosome:AUK_PRJEB4211_v1:10:10239155:10240248:-1 gene:GSCOC_T00031496001 transcript:CDP10698	MGAPFLITLAAMALLSSLAIASDPSPLQDFCVAINDSKAAVFVNGKICKDPKVVNANDFFFQGFNIPGNTNNPVGSNVTRVLVNNLPGLNTFGISLARIDFAPYGVNTPHTHPRATEVIFAVEGTLAASFVTSNPPNNMKNRLFTKVLNPGDVFVFPQGLVHFIQNLGKTKALAFSGFSSQNPGVNTIANVVFGTEPPISLGVLTKAFQVDKKVIDALEAQFS	Germin-like protein subfamily 1 member 14; Flags: Precursor	0	13.98	32	4	6	4	1	223	23.7	8.46	107	4	0	11.54	3.076	0.267	3.53	1.62	-1.91	1.04184e-06	0.00365473	0.000944294	4.02432e-05	0.0107281	0.0131032	168.2	1941.5	517.5	53.75	2.36	12.65	259.1	308.6	102.5	109.2	1959.4	1923.8	1962	1864.5	607.3	564.6	474.3	473.3	259.1	273.7
High	CDP02462	pep chromosome:AUK_PRJEB4211_v1:7:3988014:3992318:-1 gene:GSCOC_T00039845001 transcript:CDP02462 description:Sks17 [Source:Projected from Arabidopsis thaliana (AT5G66920) UniProtKB/TrEMBL;Acc:A0A178UJS3]	MGRPVMLYLVCAILAFWSSGSLVTAEDAYRYYTWTVTYGTASPLGFSQQVILINGQFPGPKLDLVTNDNVILNLINKLDQPFLLTWNGIKQRKNSWQDGVLGTNCPVPPNSNYTYKFQAKDQIGSYTYFPSTLLHKTAGAFGALNIWQRSVISIPYPKPVGDFTLLIGDWYKYNHKVLQQRLDAGKNLPFPDGVLINGQAHPSFSGDQGKTYMFRISNVGFKTSLNFRIQNHKLKLVEVEGSHVIQNTYDSLDVHVGQSATVLVTFDQPPKDYYIVASTRFTEKVLTATAVLHYTNSRTAVSGPLPAGPAPKDVQWSLNQAKTLRWNLTANAARPNPQGSFHYGKISVTKRFVLANSAPLINGKQRFAVNGVSYVNPDTPLKLADHFNIPGVFGLNSIE…	L-ascorbate oxidase homolog; Flags: Precursor	0	41.224	21	9	18	9	1	540	60.1	9.14	344	9	0	10.953	4.921	0.449	3.45	2.3	-1.15	0.000145874	0.0064464	0.256586	0.00122641	0.017632	0.763785	509.7	5582.5	2508.2	55.52	32.86	34.86	843.6	882.9	298.4	307.9	7646.9	7343.1	4244	4117.2	3382	3445.4	1802.6	1860.2	843.6	783.1
High	CDP10190	pep chromosome:AUK_PRJEB4211_v1:6:13388642:13390321:1 gene:GSCOC_T00030830001 transcript:CDP10190	MASTTKFILLSLTLCVLHLNFCHGQNAVNAGYWFPDSGIEISDIDSTLFTHLFCAFADLDPESNEVTISASNAGPFSQFTETVQLKNPSVKTLLSIGGGNSNRDDFASMASQPTSRKSFIDSSINLARANSFHGLDLDWESPQSDLEMTNLGSLLDEWRAAVATEAQNSGKPQLILTAAVSYASKVDGLYQYPITSVSRSLDWINLMAYDFYAPDRPSTSTRCHAALKDPTGQASGSSGIADWENAGVGAKKLVLGIPFYGYAWRLANANNHGILAPANGAAGPDNGAEQYRAIRTFVAQTPGAVVVYNSTYVCNYCYAGTTWIGYDDTQTVSTKVSYAKQNGLLGYFAWHIGADDNFALSRQASQAWADGSGAGSHLTLLLASQNRAGIVE	Class V chitinase; Short=AtChiC; Flags: Precursor	0	191.676	58	16	85	11	1	392	42	5.24	1689	16	6	10.914	3.208	0.294	3.45	1.68	-1.77	2.65133e-09	2.96179e-05	1.83757e-05	3.56194e-07	0.000191563	0.000826564	1274.8	13912.2	4089.3	17.87	11.45	18.26	1406.4	1516.8	1018.9	1155.4	15950.5	15074.6	12839.4	12718.1	4864	4769.7	3500.3	3506	1406.4	1345.4
High	CDP03612	pep chromosome:AUK_PRJEB4211_v1:1:36423021:36423831:-1 gene:GSCOC_T00016033001 transcript:CDP03612	MRDEVTSPRTRGVAEVSTLTICLSSSTRASGVAFFGDGPYNFLPNIEAAGFLRYTPLFINPVSTAGVSSQGEPSDEYFIGVKSIKVNDKAVPLNATLLTIDSRGNGGTKISTVNPYTVLETSIYKAVTEAFISEAAAWNISRVAGVAPFEVCVSSKNVFSTRLGPSVPQIDLVLQSQSVVWSITGSNSMVYVNDNVLCLGFVNGGVNPRTSIVIGGYQLEDLLLQFDLATSRLGFTSTLLGSRTTCANFNFTSTA	Probable aspartic proteinase GIP2; AltName: Full=Glucanase inhibitor protein 2; Short=NbGIP2; Flags: Precursor	0	34.139	37	5	13	5	1	255	27.1	5.34	387	5	0	10.415	2.033	0.195	3.38	1.02	-2.36	0.0751352	0.912751	0.295088	0.184239	1	0.846993	137.3	1429.6	279	77.81	57.59	77.23	306.5	303.2	56.7	62.2	2530.8	2426	842.5	817.8	603.2	602.4	129.2	110.2	306.5	268.9
High	CDP10935	pep chromosome:AUK_PRJEB4211_v1:10:21405741:21409242:1 gene:GSCOC_T00031905001 transcript:CDP10935	MHEEKSPRKIPFLQGFLCLLVVLLASFPSCSFAASRSSATKKKASASSVIFPVSGNVYPKGYYQVTVNIGQPPKPYFLDIDTGSDLTWLQCDAPCAKCTPAPHSPYKPNKNLVTCKDPLCVSLYWPTSHQCESLDQCDYQVEYADRGSSLGVLVQDLFPLRFTNGSISAPRLAFGCGYDQEIPGPNPPYTDGVLGLGTGKSSILSQLNGLGLTRNVIGHCLSVQGGGFLFFGDDLVPSSGIVWTSLSSNSLEKHYSVGPADLFFGGQASGVKGQSIVFDSGSTYNYFNSQAYNAVVSLLKKDINGRKQLQDAVDDKSLPICWKAPKPFKSILDVKSYFKPLALVFTSAKNVQFQLQPEAYLIVTKQGNACLGILNGTEVGIGKFNVIGDISLQDKLVIY…	Aspartic proteinase Asp1; Short=OSAP1; Short=OsAsp1; AltName: Full=Nucellin-like protein; Flags: Precursor	0	23.953	20	6	7	6	1	419	45.3	8.1	155	6	0	10.369	5.378	0.519	3.37	2.43	-0.95	0.0231988	0.143357	0.853355	0.0678536	0.263547	1	224.4	2326.2	1206.5	76.58	67.76	67.63	480.5	514.1	97.5	104.8	4550.3	4504.4	1201.4	1157	2324.6	2325.8	626.2	589.1	480.5	456
High	CDO97206	pep chromosome:AUK_PRJEB4211_v1:2:17280880:17284284:1 gene:GSCOC_T00014474001 transcript:CDO97206	MASFKCFLGFFLAFLVVSSALDMSIIDYDKKHKSSDDDEVKALYESWLVKHGKNYNALGEKEKRFEIFKDNLRFIKEHNAQDRPYKLGLNRFADLTNDEYRSMFVGGRMDRSTRLMNRRSNDRYALRAGDSLPESVDWRAKGAVAPVKDQGQCGSCWAFSTIGAVEGINQIVTGELVTLSEQELVDCDTSYNQGCNGGVMDYAFEFIIKNGGIDSEEDYPYHARGGTCDQYRKNARVVSIDGYEDVPGNDEKSLKKAVSHQPVSVAIEAGGRAFQLYHSGVFTGQCGTQLDHGVVAVGYGTENGVDYWTVRNSWGPSWGENGYIRLERNVANVTTGKCGIAIEPSYPVKTGANPPNPGPSPPSPVKPPSVCDDYYTCPEASTCCCVYEYGNYCFGWGCC…	---NA---	0	18.36	9	3	11	3	1	462	50.8	5.8	327	3	0	10.201	6.576	0.645	3.35	2.72	-0.63	1.06719e-09	2.05353e-08	0.0672307	2.25826e-07	5.75398e-07	0.300837	298.3	3043.5	1962	11.7	2.55	1.63	264.7	271.8	329.5	327.5	3143	3005.5	3081.9	2969.7	1967.5	1927	2004.3	1956.5	264.7	241.1
High	CDP18750	pep chromosome:AUK_PRJEB4211_v1:5:23551819:23554341:-1 gene:GSCOC_T00002685001 transcript:CDP18750	MFPKCWNFIIIISILLSLQLGDGQPFDYPTANLSTTWINSVSANHSVDFTDGSKVVWSANRNHPVKINATLQLTSGGDLVLRDADGTSVWSTNTRGRSVAGLNLTEEGNLVLFDRNNKVVWQSFDHPTDALVPGQKLVSGQKLTASASITNSTEGGLFSMFVNNEGLFAAVKANPPQIYYQQLVVGTKANKKASYAKFQNGSLALYIHSSEPRDPDSVITLPQISSAQYMKLGSDGHLRLYEWADGWKEVFDILTGYLGDCNYPTVCGKNGICSNGQCSCPTSVNASMNYFKPINGRQPNLGCSEITPLDCNASRYHNFLELEDMTYFTFNADITSTNMDSCKQACLGNCSCKAAIFRYGSNSSNGDCYLPAQIFSLMNNEQDKTHYNSSVFMKVQITP…	EP1-like glycoprotein 4; AltName: Full=Curculin-like (Mannose-binding) lectin family protein; Flags: Precursor	0	5.902	3	1	4	1	1	413	45.2	6.52	139	1	0	10.122	1.004	0.099	3.34	0.01	-3.33	0.000172466	0.991257	0.000380961	0.00139666	1	0.00702356	119.7	1212	120.2	45.71	45.05	43.94	82.4	69.8	176.3	174	830.2	738.4	1798.5	1769.5	108.4	100.6	133.2	238.6	82.4	61.9
High	CDP15081	pep chromosome:AUK_PRJEB4211_v1:4:10166744:10169502:1 gene:GSCOC_T00042644001 transcript:CDP15081	MAFPSFSLIFLLFCFLVSSLIASASPVRDPELVAQEVQRSIANATRARRKLGYLSCGTGNPIDDCWRCQPDWEQNRQRLADCGIGFGKNAVGGRDGRIYVVTDSGDDDPVTPKPGTLRYAVIQEEPLWIIFARDMVIQLKEELIMNSFKTIDGRGASVHIAGGPCITIQYVTNIIIHGINIHDCKQGGNANVRSSPSHYGWRTLSDGDGVSIFGGSHVWVDHCSLSNCRDGLVDAIQGSTAITISNNFFTHHDKVMLLGASDTYEQDKNMQVTIAFNHFGEGLVQRMPRCRHGYFHVVNNDYTHWEMYAIGGSAAPTINSQGNRFLAPDDRFNKEVTKYEDAPESEWKSWNWRSEGDLMLNGAFFTQAGASASSSYARASSLSARPSTLVSALTSGAGV…	Probable pectate lyase 18; AltName: Full=Pectate lyase A10; Flags: Precursor	0	57.731	33	9	22	9	1	408	44.7	6.79	456	9	0	9.991	11.834	1.184	3.32	3.56	0.24	0.00177079	0.000886363	0.995709	0.00811527	0.00325439	1	361.2	3609	4274.6	30.7	1.29	0.77	451.9	487.7	260.4	288.7	3622.9	3524.6	3622.3	3595.8	4247.2	4316.3	4254.4	4294.8	451.9	432.6
High	CDP00817	pep chromosome:AUK_PRJEB4211_v1:11:25480944:25481654:1 gene:GSCOC_T00032911001 transcript:CDP00817	MDTHQRPLFLITTFLLLLLHHPTSTHSLIDPTTYSTPAAAPTTTSAATPPATTTTYPTNKDTEFIRSSCASTRYPDECYNSLSGYASAVQQNPARLARVAIAVSLSRARLEATYFSNLSKEADYGADHRVSAAIHDCFSTFGDAVDQLRGSLNQMRHLVPAGSSETFRFQMSNVQTWMSAALTNEDTCTDGFDGVSDGPTKKDVFDRVHRAEAVTSNALALVNSYANTVAADSNFP	Pectinesterase inhibitor 7; AltName: Full=Pectin methylesterase inhibitor 7; Short=AtPMEI7; Flags: Precursor	0	20.693	33	4	17	4	1	236	25.6	6.13	304	4	0	9.677	10.322	1.067	3.27	3.37	0.09	2.9827e-07	2.01391e-07	0.997754	1.46131e-05	3.39472e-06	1	105.5	1021.1	1089.1	7.92	41.95	25.18	99.2	116.8	100.4	110.9	1514.3	1455.3	716.4	673	1332.9	1377.6	853.1	889.8	99.2	103.6
High	CDP16197	pep chromosome:AUK_PRJEB4211_v1:8:24159363:24161501:1 gene:GSCOC_T00017295001 transcript:CDP16197	MAKIALGNGREAIQPDVFQALVVEFIVTFLFVFAGVGSAMTADKLSGSPLTGLFFVALAHTLVVAVMISAGFRISGGHLNPAVTLGLCVGGHITVVRSILYWIDQCLASAAACALLKYLTGGLTTPPHTLASGVDCTQGVIMEIILTFSLLFTVYATIVDPKKGNLDGLGPLLTGLVVGANIMVGGAFSGASMNPARSFGPALVSGNWTDHWVYWVGPLIGGGLAGFVYENFFIVRSHVPLSNDETF	---NA---	0	9.239	18	2	7	2	1	247	25.8	6.51	168	2	0	9.65	10.571	1.095	3.27	3.4	0.13	8.9783e-06	5.29765e-06	0.996539	0.000158038	5.03864e-05	1	201.3	1943	2128.3	36.35	5.69	29.78	136.1	153.3	264.4	286.6	1875.2	1840.2	2073.6	2013.2	1663.3	1650.1	2878.9	2723.2	136.1	136
High	CDO96939	pep chromosome:AUK_PRJEB4211_v1:2:15207797:15208396:-1 gene:GSCOC_T00014133001 transcript:CDO96939	MRKTTLSFLLVVFAIVMTAMAPPVHGQINPDDQSPKAVERWFKKLGHAKQEKLTKLHFYFHDILSGNKPTAVQVAQANITSKSPTLFGIVNVMDDPLTVGPEPDSRIIGSAQGLYASASQKDVGLLMTLNFVFTDGKYNGSTLSILGRNPVFHKYRELPILGGSGVFRLARGIATAKTHTFNATTGDAIVEYHVIVMHY	Dirigent protein 21; Short=AtDIR21; Flags: Precursor	0	25.529	26	3	11	3	1	199	21.8	9.55	312	3	0	9.635	7.884	0.818	3.27	2.98	-0.29	1.3558e-05	4.21368e-05	0.953143	0.000203349	0.000260582	1	139.8	1346.8	1102	47.09	29.71	30.15	208.3	224.8	89.2	93.8	1800.3	1698.2	1068.1	1006.6	1414.1	1442.9	816.7	858.8	208.3	199.4
High	CDP18910	pep supercontig:AUK_PRJEB4211_v1:scaffold_305:99170:101691:-1 gene:GSCOC_T00001257001 transcript:CDP18910	MDASTQESLSSWSKLGKLDAKDGTAELVFKYAAKKMLGYEESKDQQKLRDSYKAFMDGLISFPLNIPGTPFHACLQGRKKAMKVIHDIFEKKRSGNDAAANDYDFADHLLEEIKKEDTFLNEEIARDLVFLFLFAAHETTSTALTVALRYLDGHQRVMAELKREHENILKMRETEGSAVSWKEYKSMTFTHMVINETVRLANIAPGILRKVVKEVEVKGYTIPAGWTVMVCPPSVHLDPNLYEDPLEFNPWRWEGKELHAGSKSFMAFAGGTRLCVGADYAKVQMSIFLHYLVTKYTWRVINGAERIRTPTGIRFPKGLHIEISENK	Cytochrome P450 708A2; AltName: Full=Thalianol hydroxylase; Short=AtTHAH	0	27.378	22	9	21	7	1	327	37.2	7.93	164	9	2	9.631	21.326	2.214	3.27	4.41	1.15	4.04941e-05	9.69245e-07	0.149486	0.000479525	1.2529e-05	0.544381	341.1	3285.1	7274.3	55.79	2.37	13.99	203	222.9	522	654.6	3394.6	3292.1	3278.2	3205.1	8047.7	8414	6372	6575.2	203	197.7
High	CDP15120	pep chromosome:AUK_PRJEB4211_v1:3:10632652:10634052:1 gene:GSCOC_T00042698001 transcript:CDP15120	MENCHFLVVTFPGQGHINPTLQFAKRLAKLGVRTTFSTSLGAINRMSRASDSLPEKLSIVAFSDGYDQGWTTDDDVQEYMTSLVTRGSQTLKELIMAQSNEGRPITHVVYAILMPWVGQVARQLQIPSTLLWIQPAALFQLYYCFFNGCGEVIGDISSSKAIKLPGLPTLASRDLPTFLLASNPDVYSFALPTINKHFELLQEEETPKVLVNTFDALESETLKAAVKLKLVAVGPLIPSSFLDGRDSSDSSFGGDLLQETKDCVEWLNSKNDASVVYVAFGSFADVPLKQLEEIAQGLLQSKKPFLWVLRKSPKGEKLEEKLSCKDELEKQGLIVSWCSQVEVLSHPSVGCFVSHCGWNSSLESLASGVPVVAIPLWTDQTTNAKFIQDVWKTGIRPTA…	UDP-glycosyltransferase 75C1; Short=Abscisic acid beta-glucosyltransferase; Short=Indole-3-acetate beta-glucosyltransferase; Short=SlUGT75C1	0	29.528	13	4	11	2	1	466	51.1	5.45	232	4	3	9.543	17.104	1.792	3.25	4.1	0.84	1.52573e-06	7.71112e-08	0.193148	5.18737e-05	1.56491e-06	0.641581	111.6	1064.6	1908.1	43.22	13.21	13.87	66.8	82	169.8	151.8	938.3	953.8	1188.3	1192	1719.8	1644.7	2157.3	2117.1	66.8	72.7
High	CDP14657	pep chromosome:AUK_PRJEB4211_v1:3:15150133:15151050:-1 gene:GSCOC_T00042056001 transcript:CDP14657	MSLAGKLVNQIEIKSDGDVFHEIFRYRPHHISTMSPTNVQGCDLHGGDWGTVGSVTFWNFTHDGKEKVAKVVIEAIDEGKKSITFKMIEGDLMEFYKTFIATVHVEALGQSSLIAWTIEYEKRSENVPDPNTLMELALNITKDIEAHQLK	Kirola; AltName: Allergen=Act d 11	0	21.142	31	5	13	2	1	150	16.9	5.72	199	5	0	9.492	9.959	1.049	3.25	3.32	0.07	2.09962e-08	1.66194e-08	0.999179	1.5252e-06	4.80695e-07	1	38	360.4	378.1	18.35	13.23	24.73	37.2	51	38.8	34.1	399.6	393.3	330.3	303.7	453.1	461.2	315.5	279.7	37.2	45.2
High	CDP06456	pep chromosome:AUK_PRJEB4211_v1:6:870136:873551:-1 gene:GSCOC_T00023316001 transcript:CDP06456 description:Pyruvate decarboxylase 2 [Source:Projected from Arabidopsis thaliana (AT5G54960) UniProtKB/Swiss-Prot;Acc:Q9FFT4]	MDTRIGALDTCKPLSNDVGSLPTNGAVTIHQSPISFNSADSTLGRHLARRLVQVGVNDVFSVPGDFNLTLLDHLLAEPGLNLVGCCNELNAGYAADGYARCRGVGACVVTFTVGGLSILNAIAGAYSENLPVICIVGGPNSNDYGTNRILHHTIGLPDFSQELRCFQTVTCYQAVVNNLEDAHEAIDTAISTALKESKPVYISISCNLPAIPHPTFSREPVPFSLSPKLSNQKGLEAAVEAAAEFLNKAVKPVMVGGPKLRVAKACEAFVELADASGYALAVMPSAKGLVPEQHSHFIGTYWGAVSTAFCAEIVESADAYIFAGPIFNDYSSVGYSLLLKKEKAIIVQPDRVTIANGPAFGCVLMKDFLRELAKKLKRNTTAYENYERIYVPEGHPLKC…	Pyruvate decarboxylase 1; Short=AtPDC1	0	54.059	18	9	23	7	1	603	65.1	6.11	136	9	2	9.351	4.605	0.493	3.23	2.2	-1.02	2.31359e-08	3.20658e-06	0.0107043	1.65592e-06	3.21081e-05	0.0801257	578.8	5412.5	2665.7	6.85	20.69	15.67	532.5	629.4	574.8	582.8	4567.3	4378.7	6414.1	6427	2341.7	2323.3	3092.6	3034.5	532.5	558.3
High	CDP00264	pep chromosome:AUK_PRJEB4211_v1:11:30505851:30507222:-1 gene:GSCOC_T00032149001 transcript:CDP00264	MAASDVKLLGARPSPFVNRVQFALNLKSIDHEFIPQNLAEKSELLLKSNPVHKKVPVLIHGDQPISESLVIVQYIDEVWSGPPSLLPSDPYDRATARFWAAYIDEKWFPLVRDLRNATDEQSKAAAVEKLFEGLKLLEDAFVNSSNGKGFFGGEKLGYLDIVLGCYLGWVRAGEIFTGLKILDETKTPALVGWAERFASHKAVDGVIPEPEELVNLIKMFQARAAAAAADASTK	---NA---	0	79.406	60	12	41	11	1	234	25.7	5.68	369	12	1	9.293	16.568	1.783	3.22	4.05	0.83	0.00126633	0.000124055	0.708308	0.0061694	0.000640602	1	606.3	5635.1	10046	23.41	7.38	10.68	503.6	494.4	730.1	771.2	5485.9	5265.1	6236	5788.2	8863.9	9613.2	10498.3	11347.2	503.6	438.5
High	CDO99610	pep chromosome:AUK_PRJEB4211_v1:2:10767062:10768028:1 gene:GSCOC_T00029253001 transcript:CDO99610	MNSIAATSVILAIFFILAASSSSAVRPDPNHPDHATDEKPHQSQSKGGGGDDSGEYGGFFGPGGGFNIPGFGTVGGIIRPTVVCKEKGPCYKKKLICPAKCFSSFSRSGKGYGAGGGGGGCTMDCKKNCVAYC	---NA---	0	23.174	23	6	14	6	1	133	13.5	8.47	103	6	0	9.23	11.032	1.195	3.21	3.46	0.26	0.0313027	0.0187678	0.998576	0.0875577	0.045104	1	201.5	1859.7	2222.8	9.48	82.43	90.28	196.7	199.3	239.3	203.7	4511	4591.2	766.6	753.4	6468.5	6228.5	793.2	764.5	196.7	176.8
High	CDP15780	pep chromosome:AUK_PRJEB4211_v1:6:25710298:25716212:-1 gene:GSCOC_T00015868001 transcript:CDP15780	MGKPYLGLVALFRVVSSLLCFITSPSASAADVHGGEQPLAKIAIHKTVLALRDSASIFASPSLLGKNDEDTEWITVELVNKDPAEDDWVGVFSPAKFNDSLCYPTLEDSYEESPYICTAPIKYKYANDSNPYYTSTGKTSLTFQLINQRSDFSFALFSGGLSNPKLVAVSNTIVFANPKAPVFPRLAQGKAWDEMTVTWTSGYNIDEAYPFVEWGWKGHAAMRSPAGTLTFNRGSLCGPPARTVGWRHPGYIHTSFLKNLWPNTF	Probable inactive purple acid phosphatase 27; Flags: Precursor	0	42.194	52	10	16	10	1	265	29.1	6.68	238	10	0	8.853	2.426	0.274	3.15	1.28	-1.87	3.97935e-05	0.0783902	0.00708994	0.000475204	0.158305	0.0590788	281.1	2488.4	681.9	8.91	47.45	37.81	269.4	293.2	246.3	300.9	3945.6	3784.1	1636.3	1595.5	969.1	943	493.1	476.5	269.4	260.1
High	CDO99718	pep chromosome:AUK_PRJEB4211_v1:2:9532431:9534965:-1 gene:GSCOC_T00029392001 transcript:CDO99718	MANTYQPLLDIPKKRSGFKVLYVVLSLAAILGAISIVSVAILSSSQTSTSSLRGGHLCSHAHDQSSCLQAVSEVASSGQSSDVDLLQMILAKSSAQIQETIKLTENINRRINDQREQAALADCLELMDMSVDRLMDSMVALGSQTAQSQSDAHSWLGSVLTNHVTCLDGLNGPARSVVEPMMKDLILKARTSLAMVVAIAPPKEEMIEQPLNGDLPSWVTSKDRRLLEALPKDVKANSVVAKDGSGNYKTVQEAVNAAPNNAQSRYVIYVKAGTYKEKVDIGKNKKNLMLVGDGMDKTIITGSLNVVDGSTTFNSATVAAVADGFIAQDLGFQNTAGPQKHQAVALRVGADKSVINRCKIDAFQDTLYTHSLRQFFRDCYITGTVDFIFGDAAVVFQNS…	---NA---	0	68.096	34	12	40	11	1	548	59.1	7.93	786	12	0	8.845	8.956	1.013	3.14	3.16	0.02	1.47602e-06	1.40809e-06	1	5.18737e-05	1.66923e-05	1	274.7	2429.5	2459.9	21.3	14.65	19.7	225.9	231	326.6	336.3	2214.5	2044.5	2789.6	2665.5	1986	2106.5	2872.7	2892.5	225.9	204.9
High	CDO97010	pep chromosome:AUK_PRJEB4211_v1:2:15786549:15789696:1 gene:GSCOC_T00014220001 transcript:CDO97010 description:Purple acid phosphatase [Source:Projected from Arabidopsis thaliana (AT2G16430) UniProtKB/TrEMBL;Acc:A0A178VZQ7]	MGVTRTRFSSLSFVLAVVGLILNAANFCRGGITSSFVRVDRKAVDMPLHADVFRVPPGYNAPQQVHITQGDLEGKAVIVSWVTVDERGSDTVLYWSDNATEKLKAKGTVTKYKYFNYTSGYIHHATIKHLQHDTKYYYEVGIDHTSRTFWFVTPPKVGPDVPYTFGLIGDLGQSFDSNSTLTHYESNPSKGQAVLFVGDLSYADNYPNHDNVRWDTWGRFVERSVAYQPWIWTAGNHEIDFAPEIGETKPFKPFTHRYHVPYKASNSTAPFWYSIKRGPAYIIVLASYSAYGKYTPQYKWLEKEFPKVNRSETPWLIVLMHSPWYNSYNYHYMEGETMRVMYEPWFVQYKVDLVFAGHVHAYERSERISNVAYNVVNGLCSPVSDLSAPVYITIGDGGN…	Purple acid phosphatase 2; AltName: Full=Manganese(II) purple acid phosphatase 2; Flags: Precursor	0	51.893	23	7	25	7	1	471	53.9	7.56	486	7	0	8.457	2.961	0.35	3.08	1.57	-1.51	7.27438e-06	0.00828227	0.00885663	0.00013335	0.0220183	0.0692842	656.2	5549.2	1943.2	40.84	34.37	26.88	919	1019.9	468.5	464.7	7816.2	7366.6	4180.3	4061.3	2494.2	2442.3	1546	1527.4	919	904.7
High	CDP07044	pep chromosome:AUK_PRJEB4211_v1:1:29088676:29092313:1 gene:GSCOC_T00024140001 transcript:CDP07044	MVVSSFLPQSLSLLILLLSSTSPAFSIRATGNDHNLLPSSTLNFPKKQAEKLIRELNLFPEHDININTGNNSAAAAATSVVEKRLNLPVLGDSGATVQDLGHHAGYFRLPNTKAARMFYFFFESRKDKTDPVVIWLTGGPGCGCELALFYENGPFKIANNLSLVWNNFGWDKVSNLIYVDQPTGTGFSYSSSEEDVRHDEFGVSNDLYNFLQAFFKQHPEYAKNNFYITGESYAGHYIPALASRVLQGNKNKEGTYINLKGLAIGNGLTNPGIQYKAYPDYALDMKVISQSDYNTLQKSVADCDKALKPCGTNGENSCVTAFQVCESIFNDILSIAFGLNYYDIRKECEGDLCYDFSNVEHFLSQQSVKSALGVGNIEFVSCSTTVHQDMITDIMRNLE…	Serine carboxypeptidase-like 48; Flags: Precursor	0	12.081	10	4	4	4	1	499	55.2	5.48	71	4	0	8.285	1.405	0.17	3.05	0.49	-2.56	0.0092876	0.923352	0.0418385	0.0312497	1	0.213724	78.2	647.7	109.8	51.99	85.14	84.03	108.3	120.4	33.5	56.4	1664.1	1619.6	237.9	259	281.2	271.8	44.4	42.9	108.3	106.8
High	CDP19044	pep chromosome:AUK_PRJEB4211_v1:6:34445848:34447381:1 gene:GSCOC_T00012876001 transcript:CDP19044	MKKPELVFVPSPGMGHLGSTVELAKLLIDRNEHLSITVLIMKFPFETKVGSSIDSQTEISDSRIRFLELKKDESASQTASSNLFMYQFIEDHKSSAREVLAEISDSASSDLAGVVIDMFCSSMIDVANEFGVPSYVFYTSGAAMLGLILHLQSLRDDFGEDVTNYENSKVELAVPTYINPVPVKVLPSRLFDKEGGGNMFLNLAKRYRETKGIVINSFLQLECHAIQALSNDKTIPPVYPVGPILNHKGRNGQNQETDMITKWLDIQPDSSVVFLCFGSGGWFDGEQVKEIAYALGRSGYRFLWSLRRPPPKGKFEFPGDYENLEEVLPEGFLQRTAEVGKVIGWAPQAAVLSHPAVGGFVSHCGWNSTLESVWHGVPIATWPLYAEQQVNAFQMLKDL…	UDP-glucose flavonoid 3-O-glucosyltransferase 6; AltName: Full=Flavonol 3-O-glucosyltransferase 6; Short=FaGT6	0	4.897	3	1	3	1	1	478	53	5.47	37	1	0	8.266	9.147	1.107	3.05	3.19	0.15	6.65947e-08	3.51359e-08	0.953882	4.2093e-06	9.14369e-07	1	103.1	852.3	943.1	21.64	6.4	7.14	86.2	85.8	123.3	127.7	907.8	860.9	776.9	843.8	994.4	1017.7	885.8	894.5	86.2	76.1
High	CDP11520	pep chromosome:AUK_PRJEB4211_v1:10:27017509:27019615:1 gene:GSCOC_T00033814001 transcript:CDP11520	MKKLMNMVVFDEPLTFVILRLLISIILITSFAVHPSLCTATATDHEDMKNSTSSNSTRSSWILAACLADYGVNNFTLFPSYHHHLGQDAKLYYTFLDFSISNLRFAQPSVPKPAAIIMPQSKDQLVNTLLCCRGNLGGGSFEIRVRSGGHSYEGTSSVATDGSPFVIIDLMNLNRISVDLESQTAWVGGGATLGQTYYAISEASRDRGFSAGSCPTVGVGGHISGGGFGFLSRKYGVAADNVEDALLVDAAGRVLDREAMGEEVFWAIRGGGGGIWGIIYAWKIKLVEVPRTVTAFTLSRPGTINYVGRLVEKWQHVAPKLSDDFYLSVSLASDSSEGLPPTIQVSATFDGLFLGTKREALSALIKVFPELRLRAGDCKEMSWIESVIYFSGLEPAGNS…	Reticuline oxidase; AltName: Full=Berberine bridge-forming enzyme; Short=BBE; AltName: Full=Tetrahydroprotoberberine synthase; Flags: Precursor	0	50.003	9	5	14	5	1	587	64.3	7.08	352	5	0	8.029	4.095	0.51	3.01	2.03	-0.97	1.17278e-08	2.22619e-06	0.00512453	9.92679e-07	2.41123e-05	0.0471943	344.9	2769.4	1412.5	22.3	11.37	12.14	389.9	427.8	259.3	305.2	3110.1	3013.8	2544.9	2491.1	1568.8	1529.5	1218.5	1304.5	389.9	379.5
High	CDP13034	pep chromosome:AUK_PRJEB4211_v1:8:3452667:3459157:-1 gene:GSCOC_T00037780001 transcript:CDP13034	MATHKVLRGGYNEGSGGVTGGGGFGHGIGGGYGAGGGTGYGHGGGAGAGGGYGGGGHGNGGGAGAGGGYGGGGYGKGGSGGAGGGYGGGGEGGGGHGKGGGAGGGGGYGKGGGVGVGGGYGKGGGAGAGGGYGGGGESGGGYGKGGGVGGVGYGKGGGAGGGGGYGKGGGAGTGGGYGGGGEGGGYGKGGGAGVGGGYGGGGEGGGGYGKGGGVGGGAGGGSGGGEGGGKGGGYGAGGEHGGGAGGGYGGGGASGGGYGSGGGAGGGHGGGSGGGYGGGAGGGSGYGGGGYGSGGGVGGGGGYGGGGEAGGGYGKGGGAGAGGGYGGGGEGGEGYGIGGGAGAKRGEAGGGYEKEDGAGAGGGYGGGGEGGEGYGIGGGAGAKRGEAGGGYEKEDGAGA…	---NA---	0	59.808	28	6	21	6	1	427	34.4	8.68	695	6	0	8.001	0.739	0.092	3	-0.44	-3.44	2.98172e-07	0.62158	5.26802e-08	1.46131e-05	0.881093	9.3062e-06	548.6	4389.5	405.6	17.5	22.66	25.76	607	672.8	461.6	495.9	5388.7	5340.8	3601.6	3607.7	325.7	553.4	343	479.6	607	596.8
High	CDO99728	pep chromosome:AUK_PRJEB4211_v1:2:9438023:9440917:1 gene:GSCOC_T00029405001 transcript:CDO99728 description:Serine carboxypeptidase-like 28 [Source:Projected from Arabidopsis thaliana (AT2G35770) UniProtKB/Swiss-Prot;Acc:Q8S8K6]	MSKSSSNGSLVPYVLCFVTLHLASPIFVANAKQGRHQESDRIIRLPGQPANITFSQYSGYVTVDKIAGRALFYWLIESPASEKPETKPLVLWLNGGPGCSSIAYGASEEVGPFRVSPDGKTLGLSPYAWNKVANLLFLDSPAGVGFSYSNTSFDMVTGDKRTAKDAYNFLKRWYERFPQYKNRPFYIAGESYAGHYIPELSQVIVRHNKGLKNPIINFRGFLLGNPLIDDYYDNIGTFEFWWNHGLISDSTYEALNKSCPYDSFLFPRIQCYRALENAYSEFGDINPYAIYDNPCNDFGTLINNLNMPLPWKFRGNDQCIVKYTKVYMNNPDVQKALHANITQLPHPWMTCSEVIRSSWTDSPKSMLPIFKELIAAGHRLWVFSGDTDAVLPLTATRYS…	---NA---	0	4.102	2	1	4	1	1	470	53.2	8.73	148	1	0	7.832	7.866	1.004	2.97	2.98	0.01	5.5871e-10	5.55248e-10	1	1.35962e-07	3.44429e-08	1	113.1	885.4	889.3	24.15	5.99	3	133.7	128.7	77.2	99.3	932.7	838.7	931.6	841.6	912.6	902	853.4	876.8	133.7	114.2
High	CDP13790	pep chromosome:AUK_PRJEB4211_v1:5:27547723:27550022:1 gene:GSCOC_T00038849001 transcript:CDP13790	MLVFTIWMRSIINNWPRCPNIPPPHPISHSHSHSHSALLSSLLPCTSIYKTTIELEPNTCNAEKKSPLGKILSSMLCVRKIQSNMATPSAPHHHLLLLLSLISLSSLPSTLSAGGSVAINYGRVANDLPSPPQVVQLLKAQGLTKVKLYDTDSNVLSALSGSGISVTVALPNEQLSSAAGGQSYTDSWVQSNVLAYYPKTLIEAIAVGNEVFVDPKNTTPFLVPAMKNVYSSLVKYNVSAIKISSPIALSALQTSYPSSSGSFKSELIEPVIKPMLNFLKQTGSYVMVNAYPFFAYTANTDTISLDYALFGNSKGVTDPNNGLVYKSLFEAQLDAVFAAMNAVGFKDVKVAVSETGWPSKGDENEAGASQQNAASYNGNLVRRVLTGGGTPLRPDEPLN…	Glucan endo-1,3-beta-glucosidase 13; AltName: Full=(1-	0	12.967	8	3	8	3	1	564	60.3	8.24	92	3	0	7.82	3.034	0.388	2.97	1.6	-1.37	6.35462e-09	1.99253e-05	0.000118201	6.12434e-07	0.000153055	0.00319805	143.6	1123.1	435.8	10.83	24.9	15.99	150.5	168.7	137.1	133.4	927.9	859.1	1401.6	1359.4	379.9	380	504.4	499.7	150.5	149.6
High	CDO97904	pep chromosome:AUK_PRJEB4211_v1:4:1407049:1410416:-1 gene:GSCOC_T00021847001 transcript:CDO97904	MASFYLWLMCLCWMVVLGHGILEAEASHGVYRNLASLQPASPSQTYRTSYHFQPPKNWMNDPNGPTVYKGLYHLFYQYNPLGPDWGNIVWAHSTSKDLINWNPHKAAIFPSQKGDVNGCWSGSTTMLRGENPAILYTGIDPKSQQVQNLAVPRNLSDPYLIEWVKSPYNPLMTPTPENKIDSSSFRDPTTAWLGPDGRWRVIVGNKLNRRGKALLYRSKDFVRWTKAQHPLYSIQGTGMWECPDFYPVSSSPIGLDTSTIGEGVKHVLKVSLDDTKHDQYAIGTYVHSKDVFVPNAGAAEKFSGLRYDYGKFYASKTFYDSLKKRRILWGWINESLSREDYIAQGWSGVQAIPRLIWLDKSGKQLVQWPISEIETLRQKKVGYPLTLLKSGSTLEVQGI…	Beta-fructofuranosidase, insoluble isoenzyme CWINV3; AltName: Full=6-fructan exohydrolase; Short=6-FEH; AltName: Full=Beta-fructofuranosidase 5; Short=AtFruct5; AltName: Full=Cell wall beta-fructosidase 3; AltName: Full=Cell wall invertase 3; Short=AtcwINV3; AltName: Full=Sucrose hydrolase 3; Flags: Precursor	0	63.935	24	9	23	9	1	576	64.6	9.1	402	9	0	7.779	6.295	0.809	2.96	2.65	-0.31	0.0137046	0.028348	0.995203	0.0435522	0.0649016	1	778.9	6059.2	4902.9	8.09	35.99	27.92	755.3	693.9	838.1	803.2	4516.9	4143.4	8127.9	8342.7	3709.7	3892.5	6263.4	6175.7	755.3	615.5
High	CDP11888	pep chromosome:AUK_PRJEB4211_v1:5:20507631:20512696:-1 gene:GSCOC_T00035173001 transcript:CDP11888	MEKSVLVFNAAPYMGHLAQSVQLAKLMLEKSNQLSVLFLVMKVPVDPEGTIKVQNIISGCNFERLRFHHLPTPENTDNWSSNKGLFINQLVECQKPHVREIASKIEGLSGFILDATTSTLSDVAEEFRVPSYIFFTSSAASFGLMLHVQSLQDEHNQDTFELLKTSQELTLPSFVQPVPITVLPTGITDKLLWSSRMHKLIQYWRKPKGLIINTFSELEDFALDSFVKDSAYGKTGLPRIYPIGPVLNRSETKIKSHSEIIEWLDNQPPNSVVLVSFGSLGSFDLDQVKEIASGLEQSRHRFLWVLRRPSAEKGGFPREYENLELVLPKGFLDRTASIGKVVGWVPQLAVLSHSAVGGFVSHCGWNSILESIWCGVPIATWPLAAEQQLNAFHLVKELG…	UDP-glycosyltransferase 71A16; AltName: Full=UDP-glucose:chalcone 2'-O-glucosyltransferase; AltName: Full=UDP-glucose:flavonol 2'-O-glucosyltransferase	0	16.205	6	4	7	4	1	972	108.7	6.57	94	4	0	7.777	5.564	0.715	2.96	2.48	-0.48	0.000130724	0.000884552	0.825374	0.00114122	0.00324929	1	167.5	1303.1	932.2	49.73	32.04	31.79	250.3	291.4	112.2	107.1	1823	1680.4	982	1010.5	1226.2	1255.8	708.7	702.5	250.3	258.5
High	CDP16024	pep chromosome:AUK_PRJEB4211_v1:7:22361509:22363156:1 gene:GSCOC_T00017006001 transcript:CDP16024	MDHQKQFSTPHVLVFPLPLQGPVNCMLNLAELFCLGDLHVTFINTDHVQDRLRSCSDVESRFERYPNFRFHTIPDGLPEDSPRTGGHILKLIQSLEVVSQPIFRAMVTSGSLGHNSEKPATCIIADGIFSFAVDIAKEIGVPLIYFDTISPCGLWTYLCIPKLIEAQEFPFKGDDLDAPLSSLQEMECIMRRRDLPSFCRVREIDDPLIRIILEEDRQLPLAQAIIFNTFEELDRGTLSLMRTLGPTVYAIGPLHTHLKSRLAATTSPPASSHSLWKEDKSCIAWLNDQPVKSVIYVSIGSLATMTKDQLMEIWYGLVNSGVRFLWVQRPGSIAGSAAKGDQIPEELAKATQERGYIVDWAPQEEVLGHPGIGGFLTHSGWNSTLESIAEGVPMIGWPY…	7-deoxyloganetic acid glucosyltransferase; AltName: Full=UDP-glucose glucosyltransferase 8; Short=CrUGT8; AltName: Full=UDP-glycosyltransferase 709C2	0	16.362	16	4	6	4	1	483	54.1	5.33	91	4	0	7.735	9.129	1.18	2.95	3.19	0.24	0.147717	0.102129	0.999423	0.316923	0.19753	1	53.8	416.3	491.3	101.41	72.46	67.11	9	15.4	187.6	188.5	205.1	185.6	845	860.6	254.4	253.1	966.6	948.8	9	13.7
High	CDP08669	pep chromosome:AUK_PRJEB4211_v1:2:53960202:53962575:-1 gene:GSCOC_T00027714001 transcript:CDP08669	MRTPTIALSLLLLLFSTFLTSTPTPTPTHKLDCQTFIPNSLPKPTQSPSWTSDGEPQTILSQETAAGTEFQSNNFSLELHHVDALSLSPHASPESLFNLRLQRDAFRAKSISDMASGRGRQGVGLGRMNFSSSVISGLSQGSGEYFTRLGIGTPPKYSYMVLDTGSDVVWIQCSPCKKCYTQADPLFDPSHSSSFAGVACASPLCRRLDSPGCNNRQKCLYQVSYGDGSFTFGEFSTETLTFRRVRVNNVGLGCGHDNEGLFIGAAGLLGLGRGKLSFPSQAGRRFGRKFSYCLVDRSSSSRPSSIVFGESSVSRTSVFTPLLTNPKLDTFYYVGLNGISVGGSRVPGITESHFKLDAAGNGGVIVDSGTSVTRLTRPAYIAMRDAFRAGASNLRRAPD…	---NA---	0	23.272	6	2	9	2	1	487	52.1	8.7	408	2	0	7.641	7.218	0.945	2.93	2.85	-0.08	1.33719e-07	2.0892e-07	0.995982	7.35376e-06	3.48239e-06	1	125.2	956.6	903.7	35.31	9.79	8.9	164.6	177.4	95.2	87.7	1088.6	1008.9	882.7	907	970.4	984.8	841.6	834.7	164.6	157.4
High	CDP18184	pep chromosome:AUK_PRJEB4211_v1:9:4562389:4565541:1 gene:GSCOC_T00007085001 transcript:CDP18184	MSTLAKLRCVTLDVTGTLIAYKGELGDYYCMAAKAVGLPCPDYKRVHEGFKLAYTDMAKKHPCFGFAEKIPNIVWWKSCVRDSFVKAGYDYDEETFERVFKRIYASFGSSAPYSIFPDSQPFLRWLRKKGLKVGLVSNAEYRYQDVILPALGLNQGSEWDFGVFSGLVGAEKPDPRIYEIALEKAGNIPPEEALHIGDSMRKDYLPAKSAGMHALLLDRFKTPDAENWRKSGATVLPDLVATQEWLTNSERLSC	---NA---	0	42.923	38	7	17	7	1	254	28.6	7.68	243	7	0	7.636	3.958	0.518	2.93	1.98	-0.95	4.32972e-08	7.11707e-06	0.0112682	2.8097e-06	6.41643e-05	0.0835743	407.3	3109.7	1611.7	6.32	8.65	7.29	392.3	406.3	408.2	452.8	2926.6	2822.9	3304.3	3359.9	1538.2	1489.7	1735.5	1688.8	392.3	360.4
High	CDP08178	pep chromosome:AUK_PRJEB4211_v1:8:24623493:24627937:1 gene:GSCOC_T00026930001 transcript:CDP08178	MFLSCIWFLELLLLSLLFNVNSAQTIVKSLPGYPGELPFKLETGYVSVGKNDTVQLFYYFIESERDAVRDPLVLWLTGGIGCSAFSGLVYEIGPLNFDAESYNGSLPSFILNPYSWTKIANIILLDLPVGTGFSYATTSQGYLSSDTKSTNDAYMFLQKWLLNHPKFINNRLYIAGDSYGGKIAPMVVLEITKGGNEAGLTPHMSIEGYLIGNPAMNVPKDMNWRVPYAHLLALISDEYYERAKSSCDGEYMNPNPNNTECQFALQLIKQCTSDICLSHILEPICKFRAPKLDGLKWDLTYFEEDPNDVLLLSSDQENPKCRFTDYVLSYVWMNNPSVREALQIRKGTKEKWKRCNGSLPISYDQDVTSVFDHHQVLSTKGYQALVYSGDHDMMIPYIG…	---NA---	0	4.03	3	1	2	1	1	508	58.3	6.96	37	1	0	7.528	7.665	1.018	2.91	2.94	0.03	1.03041e-07	8.61353e-08	0.999685	5.8314e-06	1.71281e-06	1	68.5	516	525.3	33.41	6.15	3.5	89.8	92.9	48.6	52.3	543.3	497.7	535	476.2	520.5	509.3	552.8	530.2	89.8	82.4
High	CDP15123	pep chromosome:AUK_PRJEB4211_v1:3:10574045:10575725:1 gene:GSCOC_T00042703001 transcript:CDP15123	MQLKLVAGNSAGTVTAYYLSSQGPTHDEIDFEFLGNVTGQPYILHTNVYAQGKGGREQQFYLWFDPTKNFHTYSMAWTRDHIIFLVDNTPIRQFKNAESLGVPYPKNQPMRIYSSLWNADDWATRGGLVKTDWTQAPFTAYYRNFNAQTATVGKLSNGAWQNQELDANSRRRLRWVQKNFMIYNYCTDYKRFPQGFPPECRL	Probable xyloglucan endotransglucosylase/hydrolase protein 16; Short=At-XTH16; Short=XTH-16; Flags: Precursor	0	23.298	32	5	10	5	1	202	23.5	9.1	231	5	0	7.504	1.133	0.151	2.91	0.18	-2.73	0.000171543	0.993474	0.000356941	0.00139034	1	0.00668216	521.2	3910.9	590.7	42.56	53.49	41.66	354.2	354.1	768.5	766.8	2392.2	2341.5	6505.8	6393.9	404.7	415.1	898.8	840.7	354.2	314.1
High	CDP01414	pep chromosome:AUK_PRJEB4211_v1:7:12386110:12388315:1 gene:GSCOC_T00036456001 transcript:CDP01414	MVELLQCRRLAKNLAGLSLLLCLAAIAVPSVEAKVRYHKWEVKYQYKSPDCYQKLVITINGRSPGPTINAQQGDTVIVEIRNSLLLEDVAIHWHGIRQHGTPWADGTEGVTQCPIIPGDTFTYKFVVDKPGTFLYHAHYGMQRGAGLYGLIKVSLPAGESEPFSYDYDRSIILTDWYHKSTYEQMTGLNSIPFVWVGEPQSILIQGRGKFNCSTPGTEADLCNATNPECSPFSLTVVPGKTYRLRIGSLTGLSALSFEIEGHNMTVVEADGHNVEPFVVQNLFIYSGETYSVLIKADQDPSRNYWASAHIVSRNSNTTNGLGIINYYPNHPKRNPPTSSPVGPRWNDTAPRIAQSQAIKALKGYIHTPPQTTDRVIVMLNTQNRIDGHVRWSVNNVSFG…	L-ascorbate oxidase; Short=ASO; Short=Ascorbase; Flags: Precursor	0	13.537	6	2	3	2	1	578	64.6	7.93	81	2	0	7.49	6.838	0.913	2.9	2.77	-0.13	1.54918e-06	2.93482e-06	0.987166	5.18737e-05	3.05339e-05	1	18.2	136.6	124.7	4.75	9.36	7.69	18.3	19.4	17.3	18.2	138.1	126.6	135.1	157.4	134.7	132.6	116.8	117.3	18.3	17.2
High	CDP01617	pep chromosome:AUK_PRJEB4211_v1:7:10203803:10204909:1 gene:GSCOC_T00036720001 transcript:CDP01617	MAISATISSRYGGSFLQQNLDHFKISVQTIPRSQNIRMIVPKKINPASHVANSSALEAAQVQEKKPLSLDSPFPDFRFDEYMNTKAISVNKALDDAIPLQEPIKIHEAMRYSLLAGGKRVRPMLCIASCELVGGDESLAMPMACAVEMIHTMSLIHDDLPCMDNDDLRRGKPTNHKVYGEETAVLAGDALLSLAFEHVAAKTGNVEASRVVRAIAELASSVGSQGLVAGQIVDLSSEGEQVDLNHLEYIHVHKTSKLLEAAVVCGAIVGGANEAEIERMRNYAKCIGLLFQVVDDILDVTKSSEELGKTAGKDLATDKATYPKLMGLERAKKFADELVAVATEELSHFDAVKAAPLYHLANYIAYRQN	---NA---	0	49.061	30	7	19	7	1	368	40	6.04	472	7	0	7.417	7.966	1.074	2.89	2.99	0.1	6.64739e-05	4.55382e-05	0.999363	0.000690957	0.000277706	1	697.6	5173.9	5557	5.28	11.7	10.87	686.7	708.7	634.1	712.9	4703.3	4636.6	5691.7	5750.1	4943.2	5143	6004.3	6147.1	686.7	628.6
High	CDO98292	pep chromosome:AUK_PRJEB4211_v1:4:4271252:4275332:-1 gene:GSCOC_T00022339001 transcript:CDO98292	MAKGSKCQFIFLATLLLVDTIQSFLMSETDENEVKTLVYLSPKFELGPGSVINKYYYDIDFPRGHIAVKSFDAEVIDEAGNSIPLYETYLHHWVAVNYYQRRGVETPKYHSRVGFQKSDYISAGNNGVCAQVLSQFFGLGSETRKTSNNVPDPYGIEFGNPAVIPAGYDEKWLLNVHAIDTRGAENRLGCTECRCDLYNVTVDEYGHNLDPSYVGGLRCCYDETRCRLKEGFQGVKRSLYLKYTVTYVDWHSSIGAVRVYIFDVTDRWKKSDGISSRHDCLIEYDVESCPAGVTKGGCVHTKSVSIILPAGGNVIYGVAHQHTGGVGSTLHGEDGRVICSSLPIYGEGKEPGNEAGYIVGMSTCYPQPGSVKISNGETLTVKSYYSSEQGHTGVMGLFY…	---NA---	0	8.248	6	2	3	2	1	464	51	6.47	61	2	0	7.382	10.278	1.392	2.88	3.36	0.48	0.00691968	0.00201866	0.952384	0.0247179	0.00644755	1	96.7	714.1	994.1	82.74	40.89	40.48	40.8	37.7	243.8	229.3	492.2	495.4	1029.2	1041.1	678.7	703	1463.2	1405.9	40.8	33.4
High	CDP07753	pep chromosome:AUK_PRJEB4211_v1:2:25770944:25771549:-1 gene:GSCOC_T00025113001 transcript:CDP07753	MQNQPFFSNILIKSQLTPQENPRFFSTSNASSSSSSDQEKAGKPESQSEYPSQNPAFKHQEIDGPTVERDVSALANETREVLETMMKTVYSLSKALAGLGLINLGLGAWISYVTTASPVVEVSVQSILAFGLPFSLAFMLRRALKPMYFFKKMEEQGRLQILTLTLQVAKQLNLLFIRVRGVSYLCIAGASVGLVYVALAR	---NA---	0	14.636	19	2	4	2	1	201	22.1	9.2	74	2	0	7.112	4.159	0.585	2.83	2.06	-0.77	0.00206354	0.0195427	0.771253	0.00919713	0.0467498	1	65.4	464.9	271.9	32.36	68.47	47.76	40.4	53.1	82.6	80.5	247.3	201.6	879.2	873.7	172.5	179.2	433.7	412.4	40.4	47.1
High	CDP19301	pep chromosome:AUK_PRJEB4211_v1:2:28820178:28826685:-1 gene:GSCOC_T00011530001 transcript:CDP19301	MSGAGKVVGVTGASGYVASWLVKLLLERGYTVKASVRDLNDPENIEHLISLDGAKERLHLFVADLMKDGSFDEVVDGCEGVFHTASPFKPVVSDPEAELLDPAVKGTLNVLQSCTRVSSVKRVVVTSSIASVAYNREAKDGVVVDESWFSEPSYCEERKLWYVLSKTLAETAAWKFSKEHGIDMITIHPSWIIGPHLQPSINTSVQLILNLLNGDESFPYANFRWVDVRDVAHAHILAYENPSASGRYCLVERAAHISQVIKILQELYPTHQFPDKLSHDSILINPDYSVSNEKAKALGVQFIPLEVSLKDTIEGFKKKNLVSI	Phenylacetaldehyde reductase; AltName: Full=2-phenylethanol synthase	0	39.686	34	6	20	6	1	324	35.8	6.05	361	6	0	7.036	7.901	1.123	2.81	2.98	0.17	0.0157617	0.00965452	0.998989	0.048908	0.0252647	1	85.8	603.4	677.5	79.96	39.84	33.99	183.9	220	35.8	40	879	831	398	438.1	886.7	955.7	491.7	517.7	183.9	195.1
High	CDP07813	pep chromosome:AUK_PRJEB4211_v1:2:26851152:26853957:1 gene:GSCOC_T00025208001 transcript:CDP07813	MAVNISLLLSFCFLFISSAFAAPKPIHTPKPVRTPLEGLLPNGNFEDPIKPSDIKKTTLIGKYALPKWEISGKVEYIHGGPQPGGMYFAVAHGVHAVRLGNEASISQTIPVKIGTLYALTFGASKTCAQNEVLRVSVPPQTGDLPLQTLYSSNGGDTYGFGFIPNTNYAKITFHNPGIQEDPACGPLLDAVAIKELSPPKPTRANLVKNGDFEEGPYRLINSSHGVLLPPSQEDRTSPLPGWIIESLKAVKFIDAMHFNVPSGRAAIELLGGRESVIAQIIRTVPNKEYNLTFSVGDGKNGCHGSMMVEAFAAKSTLKVPFQSVGKGQYKTVSFKFTAISARTRLTFFSSFYHTKIDDYGALCGPVLDNVKVVTARF	---NA---	0	119.27	57	15	62	15	1	377	40.7	9	739	15	0	6.907	3.046	0.441	2.79	1.61	-1.18	1.18827e-08	1.53725e-05	0.000463547	9.97119e-07	0.000124466	0.00830963	2121.3	14651.2	6461.4	5.42	22.91	21.54	2219.4	2190.5	1976.8	2054.3	18449.7	17629.2	12176.3	12006	7770.1	7860.1	5343.6	5373	2219.4	1943
High	CDP11579	pep chromosome:AUK_PRJEB4211_v1:7:20477757:20479132:-1 gene:GSCOC_T00033915001 transcript:CDP11579	MAGDKVVVLGTYVSMFSMRVQVALAEKGIEYENKEEDLANKSPLLLEMNPVHKKIPVLIHNGKPVCESLIIVQYIDEVWHDKNPLLPSDPYQRAQARFWADFIDKKVYDCGRRIWATKGEEKEAAKKEFIGIMKTLEGELGNKPYFGGEDFGYVDVALIPFYCWFHAYENFGNFKTETECPKLVEWAKRCMQRESVSKSLADPHKIYEFVVSLKKKLGIE	Probable glutathione S-transferase parC; AltName: Full=Auxin-regulated protein parC	0	25.748	24	6	9	4	1	220	25.3	6.68	97	6	0	6.825	6.935	1.016	2.77	2.79	0.02	0.00865186	0.00772679	0.999997	0.0296722	0.0207203	1	117.7	803.5	816.4	78.15	4.37	9.13	56.7	48.1	244.5	286.2	875.1	803.2	803.9	802.7	835.3	960.1	795.8	798	56.7	42.7
High	CDP17748	pep chromosome:AUK_PRJEB4211_v1:2:51743360:51745648:-1 gene:GSCOC_T00003852001 transcript:CDP17748	MLMVFLTISFNQVFASDPDMLQDVCVADLTGKPKVNGFICKENITANDFFTTILGTPGATNNTFGSVVTGANVEKVPGLNTLGVSLSRIDYAPGGLNPPHTHPRATEMVFVLEGELDVGFITTANVLISKSIKKGEVFVFPRGLVHFQKNNGNVAAAVISAFNSQLPGTQGISVTLFASNPPVPENVLTMAFQIGSKEVDKIKSRLAPKK	Nectarin-1; AltName: Full=Superoxide dismutase [Mn]; Flags: Precursor	0	30.741	35	7	20	6	1	210	22.4	7.99	160	7	1	6.666	3.971	0.596	2.74	1.99	-0.75	0.00122482	0.0156682	0.681667	0.00599115	0.0386821	1	842.8	5617.9	3346.3	21.61	2.55	2.61	679	704.2	1010.2	1008.7	5652.8	5348.1	5617.5	5618.4	3306.7	3307.5	3385.6	3493.4	679	624.6
High	CDP16155	pep chromosome:AUK_PRJEB4211_v1:8:23497221:23498666:1 gene:GSCOC_T00017236001 transcript:CDP16155	MKKTELLFIPGPGMGHLASAVEFGKLLINRDEHLSIVYIIIDLSYNTGVDAFMEPQLTDAYSCIRFVNIPYQIDSSDHQEPKSKNRNVVAVELINRQKPLVRDAVLDIISKANSDREIAGIVVDMFCVGMIDVAQEFELPSYMFFTSSAGFLGLMLHVQSLHDEYNEDITHYKDSDAELLVPSFSNPVPAKVLPTTMLDKNWGSAAVVTSARRMLEVKGIIVNTFHELESYAIKSLSGQAGKIPRIYPIGPIINWNSKQDDGIMSWLDTQPSCSVVFLCFGSLGSFSCEQVKEIAVALEHSRCRFLWSLRQPPAKGEIDAPSAYANPEEVLPEGFLQRTSGVGKVIGWAPQMAVLSHPAVGGFVSHCGWNSILESLWAGVPIAAWPMYAEQQTNAFEVV…	---NA---	0	35.003	23	7	8	7	1	481	53.5	5.21	237	7	0	6.619	14.825	2.24	2.73	3.89	1.16	0.0040426	0.000164346	0.40139	0.0155536	0.000796926	1	74.4	492.6	1103.2	64.6	32.34	29.59	137.8	138.9	40.2	38	644.7	685	373.8	376.3	1414.3	1414.3	815.4	860.6	137.8	123.2
High	O24381	Plastidic ATP/ADP-transporter OS=Solanum tuberosum OX=4113 PE=2 SV=2	MEGVLQTRGLLSLPSKPKIKAFYPLPQGGLRNRFNSLSSLKPNPLNGVSLSSNGFQKVQGFDTKPQLFGQKKRCFPICKAEAAAAAGAADGQPLFVEKEQPKFMGIELVTLKKIIPLGAMFFCILFNYTILRDTKDVLVVTAKGSSAEIIPFLKTWVNLPMAIGFMLLYTKLANVLSKEALFYTVILPFIAFFGAFGFVLYPLSNYFHPTAFADKLLNTLGPRFLGPIAILRIWSFCLFYVMAELWGSVVVSVLFWGFANQITTVDEAKRFYPLFGLGANVALIFSGRTVKYFSSLRSSLGPGVDGWAISLKGMMSIVVMMGGAICFFYWWVNRNVALPTRSKKKKVKPNMTTMESLKFLVSSKYIRDLATLVVAYGISINLVEVTWKSKLKAQFPSPN…	Plastidic ATP/ADP-transporter	0	8.274	2	1	3	1	1	631	68.8	9.48	80	1	0	6.585	8.545	1.297	2.72	3.1	0.38	0.0179909	0.00598336	0.974485	0.0546408	0.0164521	1	79.2	521.8	677	66.43	59.58	61.47	146.1	153.3	38	43	900.9	876.9	258.9	310.5	1233.8	1218.2	372.1	376.3	146.1	136
High	CDP19306	pep chromosome:AUK_PRJEB4211_v1:2:28926800:28930325:-1 gene:GSCOC_T00011537001 transcript:CDP19306	MAAWEAEKDRTVCVTGAGGYLASWLVKLLLSRHYTVHATLRNPDDEKYVHLKKLDKAAENLKLFKADLLDYNSISAAIRGCDGVFHVASPVPSGSVPNPEARPFSIVELVEPAVKGTLNVLKACSEANVKRVVAVSSLAAVVMSPNLPEGEIIDEKCWSDGEYCKATNIWYCYSKTVAEREALQYAKETGLDVLTVCPSYVFGPMLQHDANASSLILIKLLKEGCEETENKFYNTVDVRDVAEALLLVYGRPEAEGRYICSPHVTTTKDMVETLRKNYANYKYPKRLIEVKDQSRWNISSEKLERLGWRYRPVEETLVDSVESYKQAGILD	---NA---	0	29.171	33	7	13	5	1	331	37	6.13	105	7	2	6.482	5.427	0.837	2.7	2.44	-0.26	4.77553e-07	1.6769e-06	0.88416	2.15156e-05	1.93668e-05	1	198.8	1288.3	1078.7	9.26	29.91	38.01	180.3	192.3	223.6	205.4	974.1	993.5	1670.5	1672.5	760.2	773.6	1533.6	1504.3	180.3	170.6
High	CDP05792	pep chromosome:AUK_PRJEB4211_v1:5:26941837:26944271:1 gene:GSCOC_T00021077001 transcript:CDP05792	MNHAILETQKIMNQINDQNEQGALEDCLDLLDLSVDRVTDSMMALGGGTTRISYLNVQTWLSGALTNHVTCFDGLNISGRKLMGEVVQDLISRARASLAMLAAVHTAPNEEEMMQPLKGEAPSWLTLRDRKLLEKSAEDIKADAVVARDGTGDYKTIAEAVAAAPDKSKKRYVIYVKKGTYVENVEVTKKKKNLMIVGDGMDLTVVSGSLNVVDGSTTFKSATLAAVGDGLILQDICIQNTAGPEKHQAVALRVGADQSVINRCRIDAYQDTLYSHSLRQFYRDCYVTGTIDFIFGNAAVVLQNCTLVPRLPMKDQKNMVTAQGRIDPNQNTGTSIQNCEIIASQDLEPVKSSFPTYLGRPWKEYARVAVLESYIGDEIDPAGWSVWSGDFALKTLYFG…	Pectinesterase/pectinesterase inhibitor PPE8B; Includes: Pectinesterase inhibitor PPE8B; AltName: Full=Pectin methylesterase inhibitor PPE8B; Includes: Pectinesterase PPE8B; Short=PE PPE8B; AltName: Full=Pectin methylesterase PPE8B; Flags: Precursor	0	45.242	26	7	20	5	1	454	49.6	5.54	300	7	0	6.329	9.347	1.477	2.66	3.22	0.56	2.37852e-07	1.61996e-08	0.195725	1.23152e-05	4.79205e-07	0.647706	170	1075.9	1588.9	9.72	26.46	24.59	157.9	155	183	187	819.1	866.5	1335.8	1348.9	1253.6	1318.3	1914.9	2032	157.9	137.5
High	CDP02212	pep chromosome:AUK_PRJEB4211_v1:7:2160328:2162854:1 gene:GSCOC_T00039535001 transcript:CDP02212	MSRLSFLLGLIIAATTFRVVVNGSESGLEIYELKKGDFSLKVTNFGARIMSVVLPDKNGKPADIVLGYDSVKDYLNDTAYFGAVVGRVANRIGGAQFTLNGVHYKLDANEKQNMLHGGKKGFSQLIWKVEEYVKDDANPFIVFAYYSLDGEEGFPGNLLVRVSYALLEPYKLRVIMEAEALNKATPVNLAQHSYWNLGGHNSGDVLSDEVQIFASHFTPVNNQLIPTGKISPVKGTPYDFLKPHTIGSQINQLPSGFDINYALDGGGDEDNDMKVAVIAHSKKTGIGMKISTSAPGLQFYTANHLKDVTGKSGYVYQAHAAYCFETQGFPDSVNHPNFPSQIVNPGDVYTHYILYEFKTKHE	---NA---	0	30.555	17	5	8	5	1	362	39.8	6.67	177	5	0	6.313	1.987	0.315	2.66	0.99	-1.67	6.718e-06	0.05582	0.000846761	0.000129818	0.118018	0.0120632	626.4	3954.9	1244.9	23.69	1.09	14.74	797.7	745.6	497.3	526.3	4008.8	3971.4	3909	3938.4	1380	1406.7	1123	1043	797.7	661.4
High	CDP18857	pep chromosome:AUK_PRJEB4211_v1:8:17245193:17250530:1 gene:GSCOC_T00005865001 transcript:CDP18857	MKGQALERSLAAEINYHTVHVSSILPSSACKPSAKGPSRKSSLTVVHRHGPCHQLNQESSNRETLTQILSEDQTRVRSIQARHAFGADTDKIRGSKADLPAKRGSAIGTGNYVVSVGLGTPAKSYTLVFDTGSDLTWTQCEPCVRVCYKQQDPIYDPAKSSSYSNISCNAAQCSALSSATGNSPGCSASNCLYGIQYGDQSFSVGFFAKERLTLTPTDVFNEFFFGCGQNNQGLFGKTSGLLGLGRDPLSIVSQTAQKYGKYFSYCLPTKSGSNGHLTFGKGSVPNTVKFAPFSSSSSQSNAFYFLDIQSISVGGQLLSISASVFQTAGNVVDSGTVITRLPPAAYSALRSAFRQQMSQYKTAPALSILDTCYDFSSQSTVKIPKISIVFSGNVKVDLG…	Aspartyl protease family protein At5g10770; Flags: Precursor	0	77.455	34	11	52	9	1	426	45.3	8.79	600	11	1	6.299	1.705	0.271	2.66	0.77	-1.89	1.1252e-05	0.221814	0.000496972	0.000186587	0.382474	0.00874788	1450.4	9136.6	2473.4	35.88	13.31	18.58	1977.6	2023.6	1041.6	1063.8	10407.8	10078.9	8282.4	8008.6	2917.6	2882	2122.7	2071.6	1977.6	1795
High	CDP20356	pep supercontig:AUK_PRJEB4211_v1:scaffold_1129:13285:15959:-1 gene:GSCOC_T00007028001 transcript:CDP20356	MVLILFRAQLFIGELRKLVEEGKIKYIGLSEASASTIRRAHAVHPITAVQLEWSLWTRDVEEEIIPTCRELGIGIVAYSPLGRGFFSSGPKLMENLAEGDFRKGLPRFQAENLEHNKKLYERATAIASRKGCTPSQLALAWVHHQGNDVCPIPGTTKIENLNQNIGALSVKLSAEDMAELESIASAGVKGERYGPEISTWQNSETPPLSTWKRT	Probable aldo-keto reductase 4	0	81.768	63	12	58	1	1	214	23.7	7.46	888	12	0	6.275	8.424	1.343	2.65	3.07	0.42	0.0244252	0.0088155	0.977522	0.0707183	0.0232989	1	19.3	121	162.5	41.38	61.91	77.76	23.9	33.9	14.3	15.6	220.1	217.2	67.5	64.6	358.6	362.8	67.2	73.6	23.9	30.1
High	CDP11801	pep chromosome:AUK_PRJEB4211_v1:5:19302533:19304073:1 gene:GSCOC_T00035045001 transcript:CDP11801	MYTFGYFWLVILAILGAINSSQADLQLNFYAKTCPKAEEIVQDYVHEHIPNAPSLAATLIRMHFHDCFVRGCDASILLNFTSSSGNQTEKIAIPNQTVRGFDFIDRVKGLVEAECPGVVSCADIIALVARDSIVVTGGPFWRVPTGRRDGQISNAPEALTNIPAPFFNFTQLQTSFANKGLDLRDLVLLSGAHTIGIAHCFPGFSNRLYNFSGILGNQDPSLDSEYAANLKARKCKTINDTTTIVEMDPGSFRTFDLSYYRLLLKRRGLFQSDAALITSSTTLSYINQLLQGSLLNFYQEFALSMEKMGRIEVKTGSSGEIRKHCAFVNS	Peroxidase 3; Short=Atperox P3; AltName: Full=ATPRC; AltName: Full=RCI3A; AltName: Full=Rare cold-inducible protein; Flags: Precursor	0	23.233	26	5	13	5	1	330	36.4	7.11	109	5	0	6.267	2.427	0.387	2.65	1.28	-1.37	0.0110277	0.359701	0.320908	0.0363138	0.57856	0.887544	265.3	1662.8	643.9	8.6	72.61	72.41	235.5	258.2	272.7	289	3560.8	3327.8	830.8	746.1	1359.9	1335.9	307.7	310.4	235.5	229
High	CDP01966	pep chromosome:AUK_PRJEB4211_v1:7:7354730:7356462:1 gene:GSCOC_T00037161001 transcript:CDP01966	MTRPMSFLIIAAMLAFAPLCLCGMTSGGYLYPQFYDRTCPKAKEIVYSIVAKAVAREARMAASLIRLHFHDCFVKGCDASLLLDSSGAIISEKMSNPNRNSARGFEVIDEIKSALEKECPHTVSCADLLALAARDSTSGGPSWEVPLGRRDSRGASLSGSNSNIPAPNNTFQTILTKFKLQGLDIVDLVALSGSHTIGNSRCTSFRQRLYNQSGNGQPDFTLNQAYANQLRTRCPRSGGDQNLFVLDFVTPTKFDNSYFKNLLASKGLLNSDQVLVTKSAVSLQLVKQYAQNNQLFFEQFPKSMLKMANISPLTGSKGEIRKNCRTVNS	Peroxidase 72; Short=Atperox P72; AltName: Full=ATP6a; AltName: Full=PRXR8; Flags: Precursor	0	46.95	29	8	21	8	1	329	36	9.11	308	8	0	6.226	2.849	0.458	2.64	1.51	-1.13	4.93276e-10	1.15183e-06	3.35618e-05	1.23117e-07	1.40949e-05	0.0012639	826	5142.9	2353.1	2.59	11.35	8.37	799.2	825.1	851.5	827	5902.3	5512.8	4797.8	4653.1	2502.2	2542.8	2156.9	2212.8	799.2	731.9
High	CDP04718	pep chromosome:AUK_PRJEB4211_v1:7:15492553:15495301:-1 gene:GSCOC_T00018784001 transcript:CDP04718	MSTCTSTEGQVIRCKAAVAWGPGKPLVIEEVEVAPPQAMEVRLKILFTSLCHTDVYFWEAKGQTPVFPRIFGHEAAGIVESVGEGVTELKPGDHVLPVFTGECKECRHCKSEESNMCDLLRINTDRGVMLNDGKSRFSINGKPIYHFVGTSTFSEYTVAHVGCVAKINPEAPLDKVCVLSCGISTGLGATLNVAKPPKGSTVAIFGLGAVGLAAAEGARIAGASRIIGVDLNSNRFEEAKKFGVTEFVNPKDYNKPVQEVLAEITDGGVDRSIECTGSINAMISAFECVHDGWGVAVLVGVPNKDDAFRTHPINVLNEKTLKGTFFGNYKPRTDLPSVVEKYMNKELELEKFITHEVPFSEINKAFEYMLKGEGLRCIIHMGA	Alcohol dehydrogenase 1	0	61.208	44	10	20	2	1	383	41.5	6.24	485	10	5	6.201	5.934	0.957	2.63	2.57	-0.06	0.00644117	0.00801556	0.999959	0.0232044	0.02139	1	309.3	1917.8	1835.4	44.09	38.42	12.71	207	209.7	456.1	474.2	2745.4	2695.2	1359.8	1364.7	2025	2065.5	1619.6	1663.5	207	186
High	CDP11973	pep chromosome:AUK_PRJEB4211_v1:10:23125939:23127303:1 gene:GSCOC_T00035311001 transcript:CDP11973	MSSPGIQHISQCFIKPKNTPEEAKQPIYLSQWDLAMACANYIQKGLLFAKPPAFDRENQMEDLLEKLKDSLALALDHFYPLAGRLATLKQENPPIYSIYVDCNNSPGARFVHASLNSTIDDILSPVDVPKIVQSFFDHDRAINHDGHTRPLLTIQVTELIDGIFMGCSANHMIVDGTSYWHFFNTWSEIFNAKGQKIAISRPPIHKRWFLEGHGPILSLPFTHHDQFVRRHEAPQMRERVFHFSSESLAKLKAKANAESDTTKISSLQALAAHVWRCITRTRNLPPDQETSCMMAINNRTRLCPPVPQEYVGNCIQAVRATAAAGELLDRGLGWSSSKLHLAVHNHTDEIVRNWVESWLQSPVIYQAAEFIDPCSVLMGSSPRFNMYGSEFGLGKAVAI…	Uncharacterized acetyltransferase At3g50280	0	7.734	5	2	3	2	1	454	50.7	6.83	73	2	0	6.141	6.822	1.111	2.62	2.77	0.15	4.23639e-12	4.19009e-12	0.138511	3.74882e-09	4.17443e-10	0.51524	144	884.1	982.2	2.57	4.23	2.93	142.6	140.7	149.2	145.4	876.2	827.2	914.8	892.1	964.6	997	967.5	1026.3	142.6	124.8
High	CDP10778	pep chromosome:AUK_PRJEB4211_v1:5:17535210:17536292:-1 gene:GSCOC_T00031632001 transcript:CDP10778	MAKGLAIASLQILSVLLLASLGQSKTLFTNLTMYLHEFQSGDAQSIFPVAGLPNVTWGFGQFGTVFVDDNIFTQGVSIESALVGRSQAIPVVASLDGNNTALAATILFTNGKYKGSTVEFKGIALRSVDANEFAIIGGTKQFRYATGYIIFELVSAVGGYIISRVDLYIRQDIPDDYPGQDGIEIFSLQNFSIHTFHLYYLIDRAYANPTERLRILLRLGGGIKQESG	Dirigent protein 11; Short=AtDIR11; Flags: Precursor	0	21.654	19	3	9	3	1	228	24.8	5.88	215	3	0	6.139	2.291	0.373	2.62	1.2	-1.42	2.26921e-07	0.00224618	0.000282846	1.18755e-05	0.00706895	0.00552898	634.9	3897.6	1454.8	22.3	21.16	23.05	793.6	759.7	521.9	530.6	4827.9	4590.7	3309.2	3211.7	1757.3	1761.5	1204.4	1145.9	793.6	673.9
High	CDP08119	pep chromosome:AUK_PRJEB4211_v1:3:31278832:31282526:-1 gene:GSCOC_T00026851001 transcript:CDP08119	MVKNKQVLLKDYVSGSPKESDFIIATDKKTSLEVPESSDNGPANSTFEDGFSHYTPGSPINGYAVSKVLDSKHPKFKKGDLVWGITGWEEYSLIAEPDSLFKIEHTDIPLSYYTGLLGMPGMTAYVGFYEVCKPKKGEKVFISAAAGAVGQLVGQFAKLAGCYVVGSAGSKAKIDLLKNKFGFDDAFNYKEEQDLDAALKRYFPEGIDIYFENVGGKTLDATLLNMKVHSRIAVCGMISQYNLDKPEGIHNLASVLYKRIRMEGFVVKEYYHLYPKFLDLVLPYIRKNKITYVEDIAEGLENGPAALVGLFSGRNVGKQVLVVARE	2-alkenal reductase (NADP(+)-dependent); AltName: Full=Alkenal double bound reductase; AltName: Full=Allylic alcohol dehydrogenase 1; Short=allyl-ADH1; AltName: Full=Flavin-free double bond reductase; Short=NtDBR; AltName: Full=Pulegone reductase; Short=NtRed-1	0	22.84	17	3	5	3	1	326	36	7.09	150	3	0	6.122	6.967	1.138	2.61	2.8	0.19	0.186303	0.129523	0.999384	0.384455	0.241811	1	59.6	364.6	415	91.24	69.12	82.74	16.7	21.8	164.6	163.1	191	160	696.2	699.2	170.3	167.3	1011	1032.9	16.7	19.3
High	CDP10318	pep chromosome:AUK_PRJEB4211_v1:3:12703616:12704451:1 gene:GSCOC_T00031009001 transcript:CDP10318	MAPITYSSEMTSPIPPARLFKAAILDDTLLPKILPQAIKSVEILEGDGGAGTIKLSKFGEANKFKSAKHRVDELDKENFVYSYSVIESDALKEGIEKFTNEIKFEASPNGGSICKTNSSIYTKGDVQITEEEIKGATERALGMFKAVEAYLLANPDAYN	Major allergen Pru ar 1; AltName: Allergen=Pru ar 1	0	5.113	23	2	5	2	1	159	17.3	5.1	34	2	0	6.094	10.503	1.723	2.61	3.39	0.79	0.0026859	0.000244168	0.701774	0.0113229	0.00112272	1	81.5	496.8	856.3	55.21	49.63	61.41	133.4	135.2	49.8	45.1	826.6	744.3	331.7	300.5	1444.7	1556.9	507.5	416.4	133.4	119.9
High	CDP08970	pep chromosome:AUK_PRJEB4211_v1:1:30734610:30735733:1 gene:GSCOC_T00028122001 transcript:CDP08970	MDSSKVFISLFTLIKVIICLCSIQAVSASQSNLFREYIGAEFKNVKFSDVPVYSNVDFHFILSFAIDYGTSASPSPTDGNFNVFWDTANLSPDDVSAIKSQHPNVKVALSLGGATIGDAQPVYFQPSSVDSWVSNAVSSLTDIIQKYHLDGIDIDYERFHADPDTFSQCIGKLVSTLKNNGVISFASIAPFDDDDVQSHYQALWNSHGQLIDYVNFQFYAYARGTTVDQFMDYFAQQRRNYNGGKILASFISDGSGGLAPQDGFFTACTRLRSEGQLGGIFVWCADDSKAEDFQYEKQSQALLATPR	Chitinase 2; AltName: Full=Tulip bulb chitinase-2; Short=TBC-2	0	86.308	27	10	37	10	1	307	33.9	4.91	601	10	0	6.068	0.582	0.096	2.6	-0.78	-3.38	0.00761992	0.770446	0.000821442	0.0268935	1	0.0118239	1536.6	9324.2	894.2	41.66	44.17	53.3	2270	2204.5	1071.1	1032.5	14298.8	13752.5	6321.8	6220.2	1361.5	1621.1	536.9	587.3	2270	1955.4
High	CDP07012	pep chromosome:AUK_PRJEB4211_v1:1:28834489:28838599:-1 gene:GSCOC_T00024092001 transcript:CDP07012	MVILFSNIIRLSLVLQLSSISAHKNFSQPDFVGIGSLSFLCLIDMKKSHVVVSLLLVLLFHEGVVSAVRTQDGSEAWGYVQVRPKAHMFWWYYRSPNRIEDPQKPWPIILWLQGGPGASGVGIGNFQEVGPLDEFLKPRNSTWLQKADLLFVDHPVGTGYSFVEDTTLFVKTDVEAATDGTTLLIEVFNKNETLQKSPLYIVAESYGGKFAVTLALSALNAIQAGKLKLNLGGVALGDSWISPEDFTSSWGPLLKDVSRLDNNGLQKSDSLALQIKQQIAAGKMSEATDTWSALEGLISHYSNNVDFYNFLLDSDEDPLSLTAASVELKQEISLKRYSRYLQTLRSTPGGEADLDKLMNGPIKKKLKIIPQNLTWGEQSNQVFAALQGDFMSPRISEVD…	Serine carboxypeptidase-like 51; Flags: Precursor	0	15.248	8	3	7	3	1	518	57.1	6.74	229	3	0	6.015	2.02	0.336	2.59	1.01	-1.57	1.79235e-06	0.0208922	0.000578923	5.18737e-05	0.0495456	0.00904544	432.3	2600.2	873.3	14.12	14.99	12.66	368.1	401.9	465	504.6	2333.6	2229.8	3008	2897.3	777.4	797.8	1000.2	955.9	368.1	356.5
High	CDP00410	pep chromosome:AUK_PRJEB4211_v1:11:29363218:29367316:-1 gene:GSCOC_T00032343001 transcript:CDP00410	MRVMFVTPDGKESTVKYGLNRKNMDQVVGTRVVRYEREDMCDAPANDSVGWRDPGFIHDGVMVNLRKGKRYFYQVGSDSGGWSITNSFVSQDGDSNEVVAFLFGDMGTATPYSTFHRTQQESISTIKWISRDIEALGDKPALISHIGDISYARGYAWLWDNFFTQIEPVASQLPYHVCIGNHEYDWPLQPWRPDWSYSIYGKDGGGECGVPYSLRFIMPGNSSEPTGTRAPATRNLYFSFDLGPVHFLYFSTETNFLQGSKQYEFLKQDLESVDRKKTPFVVVQGHRPMYTTSNEIRDAPIRMKMLEHLEPLFVKNKVTLALWGHVHRYERFCPLNNFTCGSLGMNGQGWEAYPVHIVIGMAGQDWQPIWDPSTEPPDVPVFPQPARSLYRGGEFGYTR…	Probable inactive purple acid phosphatase 2; Flags: Precursor	0	6.574	3	1	2	1	1	494	55.7	6.33	108	1	0	5.987	5.809	0.97	2.58	2.54	-0.04	1.31384e-09	1.37565e-09	0.999993	2.55779e-07	6.34021e-08	1	80.5	482	467.7	15.64	14.45	14.44	91.6	87	64.2	74.5	534.4	537.5	434.7	402.6	540.1	525.6	413.4	416.1	91.6	77.2
High	CDP15015	pep chromosome:AUK_PRJEB4211_v1:4:9257211:9260418:1 gene:GSCOC_T00042543001 transcript:CDP15015 description:Malate synthase [Source:Projected from Arabidopsis thaliana (AT5G03860) UniProtKB/Swiss-Prot;Acc:Q9LZC3]	MLGFGTFSHSISAGRKTGMGYDVPEGVDIRGRYDPEFARILTRDALQFVADLQREFRNHIKYAMECRKEAKMRYNNGAMPGFDPATKSVRDAEWACAPVPPAVADRRVEITGPVERKMIINALNSGAKVFMADFEDALSPSWENLMSGQVNLKDAVNGTISFHDQARNRAYKLNEHTAKLFVRPRGWHLPEDHILIDGEPATGCLVDFGLYFFHNYAAFRENQGEGCGPFLYLPKMEHSREARIWNNVFEKAEKMAGIQRGSIRATVLIETLPAVFQMDEILYELRDHSVGLNCGRWDYIFSYVKTFQAHPDRLLPDRVLVGMAQHFMKSYCDLLIRTCHRRSVHAMGGMAAQIPIRDDPAANEAALELVRKDKLREVKAGHDGTWAAHPGLIPTCMEV…	Malate synthase, glyoxysomal	0	34.343	11	5	11	4	1	519	58.6	7.4	264	5	1	5.973	5.318	0.89	2.58	2.41	-0.17	3.72376e-05	8.923e-05	0.984124	0.000453089	0.000483027	1	200.4	1197.3	1066	38.05	33.94	34.95	257.4	276.2	118.1	156.1	1742.1	1554.3	922.3	895.1	1460.5	1451	775.5	783.1	257.4	245
High	CDP20458	pep supercontig:AUK_PRJEB4211_v1:scaffold_1220:4484:5477:-1 gene:GSCOC_T00004884001 transcript:CDP20458	MGEEDTVILHGMWASTYVKRVELALKIKGIPFEYVEEDLSNKSALLLKYNPVQRKVPVLVHNGKPICESLVILEYIDETWPSHGLQLLPKDPYERARVRFWAAYIQQLLESMAKLFNPDHKEAQEKALEEMYEKQRILEEGMREFFPEESPNVHPEKLGILDIMIVSTLGAFRAQEEALGVKTLDPEKNPLLFSWVEALIQLPVVKEIIPPFEKLVSLLQFIKQNGIKF	---NA---	0	17.545	17	4	9	3	1	229	26.4	5.38	175	4	0	5.948	13.466	2.264	2.57	3.75	1.18	0.110982	0.0106772	0.724988	0.253115	0.027672	1	104.4	621.1	1406.1	86	60.09	54.4	37.6	42.2	282	258.6	328	356.2	1083	1085.1	855.3	826.5	2311.6	2364	37.6	37.4
High	CDP10407	pep chromosome:AUK_PRJEB4211_v1:6:6848747:6849928:1 gene:GSCOC_T00031125001 transcript:CDP10407 description:Embryo-specific protein ATS3A [Source:Projected from Arabidopsis thaliana (AT2G41475) UniProtKB/Swiss-Prot;Acc:Q681K2]	MAKPLPDLLLLFASFLAVVITISEARSLPPPTSTLLPHLLKSFEIKPNQSAASARSCSYTVTIKTSCSSSSYTRDRVSLAFGDAYGNEVYAARLDDPSSRTFERCSTDTFRIRGPCTYDICYLYLLRVGSDGWEPESVKVYVPDGRAITFNYNTFLPDGVWFGFNHCNGGSAALLM	Embryo-specific protein ATS3A; AltName: Full=Protein ARABIDOPSIS THALIANA SEED 3A; Flags: Precursor	0	47.681	36	7	19	7	1	176	19.4	7.15	712	7	0	5.938	1.935	0.326	2.57	0.95	-1.62	6.60239e-07	0.0188156	0.000172412	2.80645e-05	0.0452079	0.00385064	838.1	4976.7	1622	22.07	14.11	15.43	703.7	669.4	998.1	1020.7	4463.2	4371.7	5549.3	5726	1431.7	1400.4	1865.7	1837.6	703.7	593.8
High	CDP02115	pep chromosome:AUK_PRJEB4211_v1:7:1514017:1516657:1 gene:GSCOC_T00039403001 transcript:CDP02115	MEFRKLILMLNILGLVANGEIGGARDVDRVDRREIKSCKFPALYNFGDSNSDTGGRSASLDMVAPPNGETFFKAPSGRFCDGRLIIDFMAEELGLPYLSAYLDSIGSNFRHGANFATGGSSIRPGGYSPFHLQLQIGQFLQFKSRTTLLYKELNHSAKSPPLQSRLPRPQDFSDALYTFDIGQNDLAYGFEHTSEAETRESIPSMLDKLGEAIHQLYKAGARNFWVHNTGPIGCLPYSVIYYLPKPRNLDGNGCVEPQNKVAQEFNEQLRRKVLQLRAQLPAAAFTYVDMYSAKYSLISNAKKLGFEDPSQFCCGSYYGYHIGCGEKAIVNGTVYGNPCPNPSEHISWDGIHYSEAANALLAKTVLDGSLADPKVSVGEACHSSMT	GDSL esterase/lipase At5g14450; AltName: Full=Extracellular lipase At5g14450; Flags: Precursor	0	5.669	8	2	3	2	1	386	42.5	6.84	24	2	0	5.821	1.012	0.174	2.54	0.02	-2.52	0.0158615	0.99998	0.0190387	0.0491864	1	0.123977	231.6	1348.2	234.4	23.04	12.7	28.83	281.5	275.5	178.4	194.7	1495	1508.8	1193.7	1215.8	320.5	293.1	187.4	183.5	281.5	244.4
High	CDP06220	pep chromosome:AUK_PRJEB4211_v1:6:23008484:23009899:-1 gene:GSCOC_T00022914001 transcript:CDP06220	MKTEELVFVPAPGRGHMVSMIEFAKRLLERDERISITVLVIRLPTPSKLESYVEELAAANSNIRFIDLPSVDRPSPELSSSIEKSASVYIEKHKPLVQDAIINHVLSDPSTHLAGLVIDLFCTSMIDIANELGVPSYVFFTSSAAFLGLMLYLPVRHSLKGTEFSISDPDSIIPAYTHPVPSRVLPSFLFDETGGYESMLYHGTRFREAKGLIINTFAELEPHAIKSLESDKELAPIYTIGPVLNFELDKNPDFEKIIKWLDDQPSSSVLFLCFGSLGGFEPPQLAEMAAALERSGYRFLWSVRAPMPRDFRTRQIEYTNFSEILPEGFFERTKDKGLVCGWAPQLDVLAHEAVGGFVSHCGWNSILESLWNGVPIATWPVYAEQQSSAFQLVKDLEFA…	UDP-glycosyltransferase 71K2; AltName: Full=UDP-glucose:chalcone 2'-O-glucosyltransferase; AltName: Full=UDP-glucose:flavonol 2'-O-glucosyltransferase	0	14.566	10	3	8	3	1	471	52.8	5.4	63	3	0	5.7	7.76	1.361	2.51	2.96	0.45	0.000702001	0.000144921	0.881807	0.00409669	0.000718632	1	202.9	1156.4	1574.2	30.37	37.92	36.52	258.5	276.8	154.4	159.2	1696.2	1569.9	851.8	807.8	2194.6	2145.1	1155.3	1100.9	258.5	245.5
High	CDP10320	pep chromosome:AUK_PRJEB4211_v1:3:12749662:12750756:1 gene:GSCOC_T00031012001 transcript:CDP10320	MAPVTSSYEVTCSIPPARLFKATILEEKHLHKILPQGVKSVEILEGDGGVGTIKLTTFVEGGELKTAKQKVDGIDKEKFTYSYTVLEADGFNDVIEKICCVIKFEPSADGGSICKTTNTYYPKGGAQISEEHVKGGKEKGLGMVKAVEAYLHANPTAYN	Major allergen Pru ar 1; AltName: Allergen=Pru ar 1	0	168.787	96	22	269	8	1	159	17.1	6.54	4111	22	15	5.669	10.039	1.771	2.5	3.33	0.82	3.81768e-08	7.03487e-10	0.00987349	2.5109e-06	4.23079e-08	0.0755361	3563.5	20202.9	35773.2	8.57	7.38	6.43	3253.6	3423.4	3709.3	3948.1	19310.8	18653	21821.7	21136.2	34065.2	33325.1	37566.9	37690.4	3253.6	3036.6
High	CDP01027	pep chromosome:AUK_PRJEB4211_v1:10:6398539:6408038:1 gene:GSCOC_T00034515001 transcript:CDP01027	MRILEIKIIFISSVILVTAIESFQPPYSCDSTNPLAQSFPFCNTTLALDHRVQDLVSRLTLDEKISQLVDSAPAIPRLNISAFEWWSEALHGISESGKGILFNGTLTAATVFPQVILTAASFDACLWYNISQAIGKEARAFYNEGQALGVTFWAPNINIFRDPRWGRGQETPGEDPSVAESYAVSYVRGIQGDSFDGGQLKDGHLQVSACCKHFTAYDLDNWDGVTRFVFNANASNQTISDLADTYEPPFESCIQQGQATGLMCAYNLLNGVPNCADYNLLTETVRGEWGFKGYIASDCDAVAVIHDDQGYAKLPEDAVADVLKAGMDVDCGSFLMNYTGRAVQQKKLSESDLDRALHNLFSIRMRLGLFNGDPTRLEYGNIGPEQVCSQEHQDLALEA…	Probable beta-D-xylosidase 7; Short=AtBXL7; Flags: Precursor	0	85.527	16	15	31	15	1	1426	155.6	5.72	613	15	0	5.652	0.531	0.094	2.5	-0.91	-3.41	0.000581185	0.24202	1.40491e-05	0.00353358	0.413223	0.000653115	2030.8	11477.5	1078.3	42.61	16.83	34.7	3031.4	2959.4	1393.6	1368.8	13709.3	13020.2	10117.6	9879.2	1162.5	1497.1	606.3	1000.2	3031.4	2625
High	CDP00929	pep chromosome:AUK_PRJEB4211_v1:10:7799184:7800626:-1 gene:GSCOC_T00034385001 transcript:CDP00929	MESSNVLHVVMFPWLAMGHLIPFFRLSKLLAGKGHKISFISTPRNLQRLPKIPQELASQIELVSIPLPEVDNLPKQGETSTDIPHEKDQFLKIAFDLLRSPIASFLENTRPKPDWIIHDYASHWLPEIAAQNGVSAAFFSLFTAAALSFLGRPSALLSGEDGRSTAEDFTVVPKWIPFPSNCAYRLHEVRKNIEDASGNESGASDFVRFAASIDRSDLVIFRTSVEFEPEWFNLVRELYQKPVVSLGVLPPSLDDDDELETDEKWQKIQNWLDKQTASKVVYVALGTEATISQKEVQDLAIGLEQSELPFFWVLRKPPGSKKDVTDMLPEGFRERINANGQGVVYTEWVPQVKILSHPAIGGYLTHCGWNSVIEALGFGRVLILFPVMNDQGLNARLLE…	UDP-glycosyltransferase 91C1	0	44.241	26	8	18	8	1	480	53.6	5.48	317	8	0	5.626	5.548	0.986	2.49	2.47	-0.02	1.7232e-05	1.65982e-05	1	0.00024813	0.000131693	1	497.2	2797.5	2758.8	36.86	12.79	9.91	341.4	365.6	676.2	691.9	2541.2	2422.4	3079.6	3107	2558.6	2560.2	3091.3	2972.8	341.4	324.3
High	CDP11239	pep chromosome:AUK_PRJEB4211_v1:9:6712514:6716117:1 gene:GSCOC_T00033357001 transcript:CDP11239	MAGSSLEDVSASGAFMRKPSTFRNAISRDPNSPFPAEAGRYHLYVSYGCPWASRCLACFKIKGLDKIISFTAVKISWARTKDTDEHMGWVFPASSTEEPGADPDPLNGAKSIRELYEIASSNYSGRYTVPVLWDKKTKTIVNNESAEIIRMLNTEFNDLAENPELDLYPSHLQSQIDEINRWIYEEINNGVYKCGFARKQEPYDEAVKKLYEALDKCEEMLSKQRYLCGGTVTEADIRLFVTLIRFDEAYAVYFKCNKKLIREYPNLFNYTKDIFQLPGISSTVKMDFIKKGYGSLSSNNPSGIIACGPDIDYSSPHDRSRF	---NA---	0	10.562	13	2	5	2	1	322	36.5	6.28	93	2	0	5.53	7.226	1.307	2.47	2.85	0.39	1.52159e-06	3.13774e-07	0.698557	5.18737e-05	4.89676e-06	1	23.7	131.2	171.4	11.11	16.7	11.35	26.9	21.4	22	25.5	137.5	163.4	125.1	110.5	187.9	177.8	165.2	143.5	26.9	19
High	CDP03044	pep chromosome:AUK_PRJEB4211_v1:6:10234796:10235914:-1 gene:GSCOC_T00041519001 transcript:CDP03044	MALPFSFLLSLFVLLLSSTASKTPKDLVHASCAHASYPNICLRTLSSYSGQANSLRGLAQAAVKVSISRSHKASNFLARLKGHNKRERGALGDCIQQMSESVYELTKTLSELQNLRLGSEFKWHLSNAETWVSAALTYEDTCLDGFREIDAQVRSDVKRAITNVAKVTSNALYLINRLDGSRG	Pectinesterase inhibitor 7; AltName: Full=Pectin methylesterase inhibitor 7; Short=AtPMEI7; Flags: Precursor	0	28.747	39	6	10	6	1	183	20.1	9.32	114	6	0	5.505	5.094	0.925	2.46	2.35	-0.11	2.35441e-05	2.43744e-05	1	0.000322332	0.000165682	1	146.4	805.9	745.6	4.94	32.98	34.12	144.8	154.8	137.4	148	858.3	756.7	1082.5	456	1000.2	1030.2	555.8	549.1	144.8	137.3
High	CDP07855	pep chromosome:AUK_PRJEB4211_v1:8:18910417:18911696:1 gene:GSCOC_T00025316001 transcript:CDP07855	MSCFTQLCIHNLQMTRIYEGISEGQPFVVPNMPDKIEFTRAQLPGVFNPGSSMADLKGIRERVEAAQVEAYGVVVNSFEEMEQRYVHEFRKVKGGKVWCIGPLSMSNKENLHKIQRGSEAGSFDEDLCLKWLDSRQPGSVIYACLGSLGRLALQQFTELALGLEESNHPFILVVKEEKKEETERWIAEDGFEERTKGRGLLITGWAPQVLILSHPAIGGFLTHCGWNSTLEAVSAGVPMITWPLFAEQFFNERLVVQILDIGASVGAKAVRHLGEEEKSGVSVRRHEIQKAISKVMDGGIDGRERRKRAKQVGEMAKMAVEKGGSSDLNIELLIQDIMQLA	UDP-glycosyltransferase 73C3	0	12.206	7	2	5	2	1	341	38	6.2	164	2	0	5.497	6.499	1.182	2.46	2.7	0.24	0.00136594	0.000526474	0.981597	0.00651132	0.00213512	1	128.7	707.5	836.4	48.24	10.54	3.71	212.6	194.7	83.1	85.1	665.7	614.7	772.5	752	816.2	801.2	857.2	864.9	212.6	172.7
High	CDP03316	pep chromosome:AUK_PRJEB4211_v1:6:7963693:7968164:-1 gene:GSCOC_T00041857001 transcript:CDP03316	MASDHGDSVFANVVRAPEDPILGVTVAYNKDPSPKKLNLGVGAYRTEEGKPLVLNVVRRAEQMLVNDTSRVKEYLPIVGLAEFNKLSAKLIFGVDSPAIQENRVTTVQCLSGTGSLRVGAEFLARHYHEHTIYIPQPTWGNHPKVFTIAGLSVKTYRYYSPETRGLDFQGLLDDLNAAPSGAIVLLHACAHNPTGVDPTPEQWEQIRQLMRSKGLLPFFDSAYQGFASGSLDEDAQSVRMFVSDGGECLVAQSYAKNMGMYGERVGALSIVCKSADVAVRVESQLKLVIRPMYSNPPIHGASIVAAILKDSHMYHEWTVELKAMADRIISMRQKLFDALQARGTPGDWSHIIKQIGMFTFTGLNAQQVAFMTKEYHIYMTSDGRISMAGLSSQTVPLLA…	Aspartate aminotransferase, cytoplasmic; AltName: Full=Transaminase A	0	81.442	42	10	34	7	1	410	44.9	7.17	591	10	0	5.496	2.668	0.485	2.46	1.42	-1.04	0.0107374	0.204195	0.513558	0.035466	0.355701	1	499.3	2743.9	1332	68.32	52.81	53.81	228	266.1	937	982.9	1699.7	1619.1	4429.6	4480.9	806.9	803.1	2221.3	2198.6	228	236
High	CDP18459	pep chromosome:AUK_PRJEB4211_v1:3:11372895:11377661:1 gene:GSCOC_T00012901001 transcript:CDP18459	MFELTVILKQPKQKSRIGAAKGRDSMASALAGLVPLSFLLLLVGCASRPLYPLPGKRYDGSKKPLQTFRPYNLAHRGSNGEFPEETAAAYMRAIEEGADFIEGDVLASKDGVLIMQHDVTLDDTTDIAEHKEFANRKRTCNVQGTNTTGFFHFDFTLEELKSLGVKQRYPFRDQQYNGKFPIITFKEFISIALDAPRVVGIYPEIKNPAMVNQYVKWPGGKKFEDKFVETLHKYGYRGEYMSKQWLKQPAFIQSFAPTSLIYVSNLTDLPKVFLIDDITIPTQDTNQSYWEVTSDKYLNFIKNYVMGIGPWKDTIVYVSENYLQPPTDLVARAHALNLQVHPYTYRNENQFLHFNFSQDPYKEYDYWINTIGVDGLFTDFTGSLHQYQEWTTPSPSGEK…	Glycerophosphodiester phosphodiesterase GDPD6; AltName: Full=Glycerophosphodiester phosphodiesterase 6; Short=ATGDPD6; Flags: Precursor	0	12.227	8	2	3	2	1	420	48	7.59	69	2	0	5.478	1.778	0.324	2.45	0.83	-1.62	1.26923e-05	0.100928	0.00103234	0.000195171	0.195493	0.0139696	169.4	928.1	301.1	13.03	4.04	8.68	142.1	157.2	188.8	182.6	948	978.4	908.5	896	280.8	276.6	322.9	324.9	142.1	139.4
High	CDP02788	pep chromosome:AUK_PRJEB4211_v1:7:6564431:6567479:1 gene:GSCOC_T00040285001 transcript:CDP02788	MKGDYHRYLAEFKTGADRKEAAENTLVAYKSAQDIALAELPPTHPIRLGLALNFSVFYYEILSAPDRACNLAKQAFDEAISELDTLGEETYKDSTLIMQLLRDNLTLWTSDIQEDAGDEIKEPSRLDTGEGQQ	14-3-3-like protein GF14-C; AltName: Full=G-box factor 14-3-3 homolog C	0	48.741	53	5	16	4	1	133	14.9	4.58	300	5	0	5.401	3.541	0.656	2.43	1.82	-0.61	1.44548e-06	4.68346e-05	0.207519	5.18737e-05	0.000281514	0.675546	180.2	973.4	638.2	27.15	4.97	10.81	219.1	216.9	123.7	149.7	1019.6	966.6	980.2	903.8	689.3	690.3	590.8	557.1	219.1	192.4
High	CDP10319	pep chromosome:AUK_PRJEB4211_v1:3:12737194:12738915:1 gene:GSCOC_T00031011001 transcript:CDP10319	MAPVTSSYEVTSSIPPARLFKATILEEKHLHKILPQGVKSVEILEGDGGVGTIKLTTFVDGGEHKTAKQRVDGIDKEKFTYSYTVLEADGFNDVIEKICCVIKFEPSADGGSICKTTNTYYPKGGAQIGEEHLKGGKEMGLGMVKAVEAYLHANPTAYN	Major allergen Pru ar 1; AltName: Allergen=Pru ar 1	0	133.847	96	19	247	5	1	159	17.2	6.38	3482	19	0	5.397	8.474	1.57	2.43	3.08	0.65	0.00185191	0.000181229	0.717089	0.00838053	0.000865179	1	275.8	1488.4	2337.1	46.24	27.9	33.27	179.1	184.4	412.4	434.8	1195.3	1143.4	1962.9	1853.3	1772.1	1685.6	3082.3	3166.7	179.1	163.6
High	CDO99300	pep chromosome:AUK_PRJEB4211_v1:3:5215659:5220765:1 gene:GSCOC_T00026408001 transcript:CDO99300	MSLISLWAQQQHDPQATDFGKMTAVASISAAVRRLQELLLDEARALGQLKPVVEGTVLPRLQESEEMLMGLPAHKIRVKGAQDDLEFGRRTRNLLSSIEDKVESYALQLGSATSSSREACCGGGGGENTAFGKLVADLKASVDGLKDCVTSYCAEQNQYPQIRKLGQKSQWLVSRANFSSGRWGDEAFGLEEEVRKLTKVLVSEETDPRVVFIVGMGGIGKTILAKKLFNHPDVRHHFKGFAWVYVGGYWSTRDILVTILDQLSSLPRKKREAMMKSEEVELAPQVFRILQRKSCLVVLDDCSDRELLDILSIAVPFAVRSASASKFILTTRNRNLSRFLDPGAVYSLRMESLNPNKSWDLFSHIWRKLKAGPIPGKLVPIAWEILARCEGLPLAIIVL…	Disease resistance RPP8-like protein 3	0	18.812	7	4	7	4	1	999	112.8	7.72	112	4	0	5.351	3.222	0.602	2.42	1.69	-0.73	1.56992e-05	0.000791763	0.208343	0.000230145	0.00295131	0.67769	148.3	793.8	478	7.46	22.29	25.15	152.7	158.8	133.5	144.1	659.5	651.6	955.3	981.6	387.1	380.1	590.3	603.5	152.7	140.9
High	CDP16888	pep chromosome:AUK_PRJEB4211_v1:11:788765:793239:-1 gene:GSCOC_T00019472001 transcript:CDP16888	MSNINIEGILKELPNDGRIPKTKIVCTLGPASRSVPMLEKLLHAGMNVARFNFSHGTHEYHQETLDNLRIAMHNTQILCAVMLDTKGPEIRTGFLKDGKPIQLKEGHEITVTTDYGIKGDEKMISMSYKKLPVDLKPGNIILCSDGTVTLTVLSCDPQAGTVRCRCENTAMLGERKNVNLPGVVVDLPTLTEKDKEDILGWGVPNNIDMIALSFVRKGSDLVNVRKVLGPHAKRIQLMSKVENQEGVINFDEILRETDSFMVARGDLGMEIPVEKIFLAQKMMIYKCNLVGKPVVTATQMLESMIKSPRPTRAEATDVANAVLDGTDCVMLSGESAAGAYPEIAVKIMARICIEAESSLDYGAIFKEMINSAPLPMSPLESLASSAVRTANKAKAKLIV…	---NA---	0	108.425	46	19	57	13	1	510	55.2	7.8	973	19	7	5.201	4.099	0.788	2.38	2.04	-0.34	8.52662e-06	5.19275e-05	0.79176	0.00015229	0.000306316	1	2275.2	11832.8	9327	5.74	8.53	3.33	2196.8	2237.7	2313.3	2496.6	11187.1	10735.9	12515.7	12811.9	9167	9026.9	9714.5	9489.8	2196.8	1984.9
High	CDP21311	pep supercontig:AUK_PRJEB4211_v1:scaffold_3283:1905:7609:-1 gene:GSCOC_T00004550001 transcript:CDP21311	MASKENFCQDYLLLNPKEAGFWDLLRIFYSSELEKRDFFDTPIADRLGGFPDRWLVFVSVVAQKILLKGKKPMANIGYYIEQGLNYPTANGGFGRLILNFLSGKVVRPDRLSATFTSAIGNLDTRWDLDSRIGANDERYGAALSVMAAKLSYENEAFITTVLGDRWQMEFLGYFNFWNDYEQIYTTQAIMFQDKKVDPDLIVVAFRGTSPFDADDWLTDLDLSWYDLEDVGKLHAGFMKALGLQKEKGWPKQIDQGSGTKEYAYYAIREKLRKSLSENRKAKFMVTGHSLGAALAILFPAILSLHEEEWLLDRMEGVYSFGQPRVGDEKFGNFMKEKLRLYDVKYCRYVYNNDVVPRLPYDDKTLLFKHFGPCLYFNSSYKGQILEEEPNKNYFSLLWV…	Triacylglycerol lipase OBL1; AltName: Full=Oil body lipase 1; Short=AtOBL1	0	11.79	6	2	4	2	1	475	54.7	6.25	107	2	0	5.177	5.002	0.966	2.37	2.32	-0.05	0.09852	0.10777	0.999998	0.229644	0.206628	1	82.5	427	412.6	80.76	57.3	54.83	35.4	34.3	192.2	200.9	238	254.5	744.3	716.5	241.3	249.5	682.1	695.7	35.4	30.4
High	CDP02510	pep chromosome:AUK_PRJEB4211_v1:7:4447673:4452233:-1 gene:GSCOC_T00039911001 transcript:CDP02510	MRKRCSNINFISGSRRALKSFAVTGTQNHPFYLLLVILIVPVAFIPATACSTGNCQLLDSCTSATDCGPGLYCGNCPAVGKTQPFCARGQATIPTSIINGLPFNKYTWLVTHNSFSIVDAPSLTGAQRITFYNQEDTVTNQLRNGVRGLMLDMYDFEDDIWLCHSFRGQCYNFTAFEPAIDTLKEVEAFLNENPTEIVTIIIEDYVHAPKGLTKVFSNAGLDKYWFPLSKMPKKGEDWPTVTDMIKDNHRLLVFTSDSSKEATEGIAYQWKHMVENEAGDPGVVPGSCPNRKESKPLNSKSASLFLQNYFPTIPDQNQACKEHSVALIDMINTCYKAAGNVIPNFLAVNFYMRSDGGGVFDAVDRMNGQALCGCTVITACQAGASFGSCKNVPASNTTP…	PI-PLC X domain-containing protein At5g67130; Flags: Precursor	0	14.391	5	2	4	2	1	441	47.9	6.81	142	2	0	5.174	1.209	0.234	2.37	0.27	-2.1	0.00164901	0.976616	0.00498751	0.0076254	1	0.0460504	108.5	561.4	131.2	15.95	43.8	33.31	119.5	128.7	91.5	98.5	832.8	800.8	344.2	393.6	179.5	174.2	98.8	96.7	119.5	114.2
High	CDP10289	pep chromosome:AUK_PRJEB4211_v1:3:12200649:12204579:1 gene:GSCOC_T00030969001 transcript:CDP10289	MASSAVEEVRVPRIKLGSQGFEVSAQGLGCMGMSAFYGPPKPEPDMINLIHYAASRGITHLDTSDVYGPHTNELLLGKALKGGIREKVELATKFGVKIEDGKREIRGDPAYVRAACEASLKRLGVDCIDLYYQHRIDTSLPVEITIGELKKLVEEGKIKYIGLSEASASTIRRAHAVHPITAVQLEWSLWTRDAEEEIIPTCRELGIGIVAYSPLGRGFFTSGSKVVENLSEGDIRKNLPRFRTENMEHNKNLYERVNVIASKKGCTPSQLALAWVHHQGNDVCPIPGTTKIENLNQNIGALSVKLSAEDMAELESIASAGIKGDRLPPGFDSWKTSDTPPLSTWEAT	Probable aldo-keto reductase 2	0	80.713	45	13	47	2	1	348	38	6.62	664	13	2	5.111	7.012	1.372	2.35	2.81	0.46	0.00267099	0.000473429	0.864489	0.0112796	0.00195047	1	158.1	808.3	1109	59.35	10.35	15.18	95.8	88.2	261.1	302.4	751.3	723.9	869.7	891.4	1011.4	971.5	1335.8	1215.9	95.8	78.2
High	CDP05567	pep chromosome:AUK_PRJEB4211_v1:11:23091828:23096454:1 gene:GSCOC_T00020689001 transcript:CDP05567	MKVATSTSHSIPKLACPDGENGLLISTKNLDQTINVDKSSMTMTVGSGMTLRELISKAAEVGLALPYAPYWWGLTVGGMLGTGAHGSSLWGLGSAVHDYIVQLRIVTPAGPEEGYAKVRILESDNPELNAAKVSLGVLGVISQVTLKLQPMFKRSITFLEMNDSSLGDQALSFGYQHEFADVSWHPSQKKVIYRVDDRVATNALGNGLNDFTGFRSTPSLVVAAVRSTEEIQESTNDANGICLNAATTIFTLKATAYGYTNDGIIFKGYPIVGYQNRLQASGSCLNGIQDALLTACPWDPRVKGLFFHQTTFSIGFSKVKGFIEDVQNLVNLVPKALCGIDIYNGILMRYVKASSAYLGKQEDGIDFDITYYRSKDPNKPRLYEDILEEIEQIAMFKYG…	Probable L-gulonolactone oxidase 6; Short=AtGulLO6; Flags: Precursor	0	42.378	28	9	17	9	1	500	54.7	7.12	252	9	0	5.107	3.678	0.72	2.35	1.88	-0.47	5.02911e-06	7.91139e-05	0.451446	0.000112278	0.000435436	1	453.3	2314.7	1666.9	27.32	11.39	9.13	377.7	372.9	543.9	643.1	2619.6	2518.2	2127.6	2098.4	1824.7	1789.3	1553	1534	377.7	330.8
High	CDP19038	pep supercontig:AUK_PRJEB4211_v1:scaffold_333:54375:56944:-1 gene:GSCOC_T00000206001 transcript:CDP19038	MRSKTIFVLVFALAIAYADCNSEGDALNAWKVSLADPNNVLQSWDPTLVNPCTWLHVTCNDENSVTRVDLGVAGLSGPLVPQLGLLANLQYLEVYGNKLSGAIPSALGNLTNLVSLDLYHNRLSGSIPAVLGNLRSLRFLRLNGNKLSGNLPDSIVQLINHGHLQILDVSNNRLAGTVRATKKTGFAVTTVIQDPKAYY	---NA---	0	29.231	33	5	18	5	1	199	21.5	8.29	92	5	0	5.084	8.048	1.583	2.35	3.01	0.66	0.0134686	0.00163283	0.807175	0.0430176	0.00538616	1	213.6	1086.1	1719.2	48.8	35.82	33.78	312.3	378.5	141.8	146.1	789.3	788.8	1502.8	1494.4	1268.1	1280	2345.5	2309.2	312.3	335.7
High	CDP05890	pep chromosome:AUK_PRJEB4211_v1:5:26224787:26226327:1 gene:GSCOC_T00021202001 transcript:CDP05890	MLAIFHKAFAHPPDELNSPASHHGSKKPKMPEETLKEFLASNPSDAFSLSFGDAAVLSYVRQDQPSLLHKNQRLFCGHDEIYCLFMGSLNNLCAQIKQYGLSKGSNEAMLVIEAYRTLRDRGPYPADQVIKDLDGSFAFVVYDSKRGTVFAALGSDGGVKLYWGIAADGSVVISDDIAVIKAGCAKSYAPFPKGCMFHSEGGLMSFEHPMNKMRAMPRVDSEGAMCGANFKVDLYSRVNSIPRVGSETNWVDWNTEQI	Stem-specific protein TSJT1	0.001	2.908	6	1	2	1	1	258	28.3	6.71	78	1	0	5.074	2.614	0.515	2.34	1.39	-0.96	4.72347e-05	0.00826904	0.0818161	0.000542196	0.0219891	0.350187	43.7	221.8	114.3	12.95	4.07	1.63	39.5	39.1	48.4	49.9	217.1	214.5	234.2	226.7	116.5	114.1	112	114.4	39.5	34.7
High	CDP01813	pep chromosome:AUK_PRJEB4211_v1:7:8550915:8554827:1 gene:GSCOC_T00036981001 transcript:CDP01813	MAESTRIPSPSSSGGTSGERTKKSRWPFACLVSVLPVVVGVLIYQLDSFDPAPYPAHELTRKKPLTVPKSNPHVLKGAENIGVGKLLGPEDIAYDPKSGVIYTGCEDGWIKRVTVNDSAADSVVADWINTGGRPLGVVCGHHGEVIVADADKGLLNATADGGIQLLTDEAEGVKFRLTDGVDVAEDGIVYFTDASYKYSFWEFAWDYFEGRPFGRLLSYDPSTKETKVLVRDLYFANGVAVSPDQKFVIFCESPMARCKKYYINGERKGSVDIFVENLPGMPDNIRYDGQGHYWIALPTEITYAWDLAQRYPFIRKIMAILERYVGRPHVEKNGGGLAVDLDGKPAAHYCERDLSLITGVNKIGDHIYLGSIDKPYIIRLNIKQYPAVSDTEYMRSLIL…	---NA---	0	37.526	19	7	15	7	1	406	44.9	5.63	245	7	0	5.058	11.671	2.307	2.34	3.54	1.21	0.0129719	0.000322423	0.296413	0.0417831	0.00142545	0.850296	405.3	2050	4730	38.88	40.93	41.73	547.2	624.7	289.1	300.2	2996.7	2906.3	1446.1	1370.8	7035.2	6829.6	3275.9	3232.4	547.2	554.1
High	CDO98669	pep chromosome:AUK_PRJEB4211_v1:4:8041570:8048040:1 gene:GSCOC_T00022841001 transcript:CDO98669	MRAAVFWEPNKPLTIEDFQMPRPKANEILIKTKACGVCHSDLHVIKGELPFASPCVVGHEITGEVVEHGALTDSKIVERFPVGAQVVGAFIMPCGSCFFCSKGQDDLCESFFAYNRAKGTLYDGETRLFLRSNGKPVYMYSMGGLAEYCVVPAHGLTVLPNSLPYTESAILGCAVFTAYGAMAHAAQVRPGDAIAVIGIGGVGSSCLQIARAFGASEIIAVDVQDEKLQKAKTLGATYTINARNEDAAKKIKEITGGMGVDVAVEALGKPQTFNQCVQSVRDGGKAVMIGLTLSGAKGEVDINHLVRRQIKVIGSYGGRARQDLPKLVKLAESGIFNLKAAVSRTLTFEEADKAYKDLDKGNIIGRAVVEIM	---NA---	0	50.735	31	9	25	9	1	372	39.7	7.78	440	9	0	5.036	4.813	0.956	2.33	2.27	-0.07	9.4794e-06	1.32318e-05	0.999477	0.000164772	0.000108483	1	1128.7	5684.5	5432.1	30.04	6.14	6.93	1480.1	1465.3	859.9	869.4	5367.9	5422.4	6036.2	5959.3	5082.7	5182	5694.3	5852	1480.1	1299.7
High	CDP07317	pep chromosome:AUK_PRJEB4211_v1:10:710672:712078:1 gene:GSCOC_T00024547001 transcript:CDP07317	MAEYDQSNIKVEEGSAVEATDRGLFNLGKKEEVKKCDQGQAISAEFDEKVRVSEPDKEEGKKHGGLLEKLHRSGSSSSSSSEEEVEEGGEKKKKKKEKKGLKDKIKEKISGDKKDEEKVEKCEEDTSIPVEKYAEPAHADAAHEPEEKKGFLDKIKEKLPGGGQKKTEEVAAAAPPPPPAECTATEGEAKDKKGFLDKIKEKLPGYHPKTEEEKEKEKEKEKEAGCH	Dehydrin ERD14	0	55.01	27	8	24	8	1	227	25.1	5.58	492	8	0	4.99	3.701	0.742	2.32	1.89	-0.43	0.00368782	0.0184336	0.916936	0.0144223	0.0444198	1	1315.8	6566.4	4870.3	45.33	31.75	23.03	1976.1	2004.8	860.6	876.2	8878.7	8640.6	4978.8	4990.1	6043.4	5915.5	3975.8	4009.8	1976.1	1778.3
High	CDO96745	pep chromosome:AUK_PRJEB4211_v1:2:12617383:12622037:1 gene:GSCOC_T00013860001 transcript:CDO96745	MEIQAIHGSGITACSAQAPAGGSLGSHLAKRLVQIGVKDVFSVPGDFNLALLDHLIAEPELNLIGCCNELNAGYAADGYARAKGVGACVVTFTVGGLSVLNAIAGAYSENLPVICIVGGPNSNDYGTNRILHHTIGLPDFSQELRCFQTVTCIQAVVNNLDDAHELIDTAISTALKESKPAYISISCNLPGLSHPTFAREPVPFFLAPKVSNQLGLEAAVDATVEFLNKAVKPVIVGGPKLRVAKAQQAFLEFANASGYPVAVMPSAKGLVPEHHPHFIGTYWGAVSSSFCGEIVESADAYVFVGPIFNDYSSVGYSLLIKKEKLISVQPNRVTICNGPSFGWVFMTEFLSALAKKLKKNSTAMENFRRIYVPPGVALTRGKDEPLRVNILFKHIQEML…	---NA---	0	39.62	21	5	14	3	1	584	62.9	6.28	184	5	0	4.955	3.103	0.626	2.31	1.63	-0.68	0.383868	0.689704	0.980997	0.683477	0.951273	1	82.5	408.5	255.9	74.73	95.06	92.64	169	191.9	38.2	40.2	1218.3	1230.6	137	100.8	737.4	738	73.2	88.8	169	170.2
High	CDP09755	pep chromosome:AUK_PRJEB4211_v1:8:29474154:29479161:-1 gene:GSCOC_T00030210001 transcript:CDP09755	MKLKLFVDRLSQPCRAILIFCKMNEIEFEEVRIELSKGEQLSPEFKEINPMQKVPAMKVDERFRLFESHAILRFLAGAFPGVADHWYPADLFKRAEIDSVLDWHHANLRHGSAGLVFHSKLARLSGRPLDLRAAADCEKVLSASLAKIESVWLKEEGQFLLGNSKPSIADLSLVCETMQLEALDEKVRKRLLDPHGKVRKWMDDTRNATQPYFDEIHGVLFQVKDKLKEMESDE	---NA---	0	39.856	45	9	16	9	1	234	26.9	6.73	187	9	0	4.935	7.28	1.475	2.3	2.86	0.56	0.000229819	2.02209e-05	0.617354	0.00171685	0.000154364	1	305.4	1507.3	2223.6	52.96	10.22	14.19	183.7	194.9	478.6	532.7	1650	1613.9	1336.5	1407.7	2454.3	2491.1	1867.6	2014.5	183.7	172.9
High	CDP03995	pep chromosome:AUK_PRJEB4211_v1:1:33668550:33670200:1 gene:GSCOC_T00016515001 transcript:CDP03995	MMINSSKVHVLVLPYPGQGHINPMLQFCKRLVAKGVKTTFVNSVFISKSIPADPKSAINFETISDGHDEGGYAAAESPEAYLEKLATFGSKALADLIRKLEDKGEPVQAVIYDSFLTWALDVAKQFGLVTAAFFTQTCAVNSIYYNVYHGLLPVPLSDSPISLPGLPLLQPKETPSFVYLPDSYPAFLHMLVNQFSNVDQADWVILNNFHKLEEDAVNWIAKLWRVITVGPTVPSIYLDKRLEDDIGYGINLFKPDSSLCINWLNSQPKDSVVYVSFGSWTEIDVEQVEEIASALKESGFKFLWVVRAFEKEKLPRKFAEETSEKGLVVTWSPQLEVLAHESVACFVTHCGFNSVLEALSLGVPVVAAPQWTDQPTNAKFLADIWGVGVKADADEKGIV…	UDP-glycosyltransferase 74G1	0	27.537	18	7	8	7	1	459	50.7	5.19	102	7	0	4.902	6.257	1.276	2.29	2.65	0.35	0.497825	0.365672	0.99902	0.83319	0.586347	1	125	612.6	781.9	96.39	96.17	93.13	39.1	33.7	408.1	399.5	191	175.4	2041.7	1965	259.5	247.3	2356.4	2374.2	39.1	29.9
High	CDP16397	pep chromosome:AUK_PRJEB4211_v1:5:3862455:3865991:-1 gene:GSCOC_T00018255001 transcript:CDP16397	MSGPMCFSNPPKLSSTCGAGNVEEIAGLQTYVTGRRDSHRAILLIADAFGYEAPNLRKLADKVADTGFFVVVPDFLFGDPADVGNPNFDPEAWMNAHPSDKGSEDAKKVIAALKSKGYTAIGAAGFCWGGMVVVKLANNLDCIQAAVVLHPGPMTEDEINEVRVPFAILGAEVDRIFSAEKIKHLASILAQKSEVDSFVKIFPGTEHGWTTRYKDEDEAAVKKAEESHLDMLNWFTKYIK	Endo-1,3;1,4-beta-D-glucanase; Flags: Precursor	0	13.39	19	5	8	5	1	240	26.1	5.48	52	5	0	4.889	5.811	1.189	2.29	2.54	0.25	2.8324e-07	7.59875e-08	0.674336	1.40695e-05	1.55491e-06	1	346.5	1693.7	2013.3	3.49	20.3	23.84	336.8	365.3	343.5	349.4	1432	1378.9	2004.1	2003.2	1619.7	1645.9	2500.8	2462.7	336.8	324
High	CDP21875	pep supercontig:AUK_PRJEB4211_v1:scaffold_7398:1515:3397:1 gene:GSCOC_T00009493001 transcript:CDP21875	MAAWEAKKDRTVCVTGAGGYLASWVVKLLLSRHYTVHATLRNPNDEKYVHLKKLDKAAENLKLFKADLLDYNSISAAIRGCDGVFHVASPVPSGSVPNPEARPFSIVELVEPAVKGTLNVLKACSEANVKRVVVVSSTAAVVMSPNLPEGEIIDEKCWSDGEYCKATNNWYCYSKTIAESEALQYAKETGLDVLTVCPSFVLGPMLQHDVNASSLALIKLLKGDLLVLCSQLENLFRY	---NA---	0	12.067	13	2	5	2	1	238	26	6.96	93	2	0	4.786	3.919	0.819	2.26	1.97	-0.29	0.0036701	0.013339	0.93603	0.014371	0.033641	1	21.2	101.5	83.1	23.79	57.14	54.33	18.2	20.9	30.7	21.5	187.2	169.5	60.7	60.7	136.9	133.4	51.7	45.8	18.2	18.5
High	CDP18121	pep chromosome:AUK_PRJEB4211_v1:4:20969056:20978218:1 gene:GSCOC_T00001598001 transcript:CDP18121 description:Alpha-galactosidase 2 [Source:Projected from Arabidopsis thaliana (AT5G08370) UniProtKB/Swiss-Prot;Acc:Q8RX86]	MVKSPGTEDYTRRSLLANGLGLTPPMGWNSWNHFRCNLDEKLIRETADAMVSKGLAALGYKYINLDDCWAELNRDSQGNLVPKGSTFPSGIKALADYVHSKGLKLGIYSDAGTQTCSKTMPGSLGHEEQDAKTFASWGVDYLKYDNCNNNNISPKERYPIMSKALLNSGRSIFFSLCEWGEEDPATWAKEVGNSWRTTGDIDDSWSSMTSRADMNDKWASYAGPGGWNDPDMLEVGNGGMTTTEYRSHFSIWALAKAPLLIGCDIRSMDGATFQLLSNAEVIAVNQDKLGVQGNKVKTYGDLEVWAGPLSGKRVAVALWNRGSSTATITAYWSDVGLPSTAVVNARDLWAHSTEKSVKGQISAAVDAHDSKMYVLTPQ	Alpha-galactosidase; AltName: Full=Alpha-D-galactoside galactohydrolase; AltName: Full=Melibiase; Flags: Precursor	0	37.874	33	11	18	11	1	378	41.3	5.92	285	11	0	4.75	0.533	0.112	2.25	-0.91	-3.16	0.000629991	0.329739	2.10955e-05	0.00376569	0.536935	0.000915018	648.7	3081.5	345.5	5.44	5.17	11.02	671.9	673.3	602.4	626.3	3338.2	3147.2	3017.3	2981.8	349.4	422.4	341.6	338	671.9	597.2
High	CDP01046	pep chromosome:AUK_PRJEB4211_v1:10:6191159:6194116:1 gene:GSCOC_T00034540001 transcript:CDP01046 description:Annexin [Source:Projected from Arabidopsis thaliana (AT1G35720) UniProtKB/TrEMBL;Acc:A0A178WGZ8]	MSTLIVPPHVPSVAEDCEQLHKAFEGWGTNERLIISILAHRNAGQRKAIRHAYAETYGKDLLKDLDKELSSDFERLVLLWTLDPPERDAVLTDEATKKWTKSNQVLVEIACTRPSKGLILVREAYHSRFKRSLEEDVAYHTTGDFRKLLLPLVSSYRYEGDEVNLRLAKAEAKILHEKIKGKHYSDDDVIRIVATRSKAQVNATLNEYKNEFGNDIIKDLEHDDDNEFLPILKATFECLVYPENYFEKVLREAINKRGTDEGALTRVVATRAEVDLKIIKDLYHKRNSVPLHRAIVKDTHGDYEKMLVALIGEDDA	---NA---	0	104.888	54	21	116	21	1	316	36.2	6.42	1112	21	0	4.584	3.295	0.719	2.2	1.72	-0.48	3.77841e-05	0.000496634	0.592673	0.00045802	0.00203165	1	5609.9	25713	18486	4.8	3.84	4.43	5532.7	5411.8	6039.4	5688.1	25449.2	24221.3	26510.4	25979.5	17702.3	18285.6	18688.6	19658	5532.7	4800.3
High	CDO99907	pep chromosome:AUK_PRJEB4211_v1:2:7883070:7883702:1 gene:GSCOC_T00029620001 transcript:CDO99907	MASKVTVFLVLLIHIYAVSSSDPDPVYDFCVPRTNLSSDALSCKNSTLVTVEDFVYSGIKSPGDFKETGFAATPVSSTVFPGLNTLGMSFVRADFAAGGVNVPHYHPRATEVGFVLEGKIYSGFIDTKNKVFARVLEKGEVMVFPRGLVHFQMNVGESPATILGSFDSQNPGLVKIPAAIFGSEIKDELLLKAFGFNSKELAKLRKHFES	---NA---	0	7.043	11	2	3	2	1	210	22.7	7.03	35	2	0	4.584	3.248	0.709	2.2	1.7	-0.5	2.39164e-05	0.000280082	0.485747	0.000325788	0.00126312	1	124.5	570.9	404.5	28.25	9.06	23.11	94.4	101.2	166.7	153.2	537.5	515.3	621.3	606.4	336	338.2	522.2	483.8	94.4	89.8
High	CDO97158	pep chromosome:AUK_PRJEB4211_v1:2:16901151:16902291:1 gene:GSCOC_T00014412001 transcript:CDO97158	MNESMNYEISRAIISFFPLLPHSALCSWFTMATNSNEILHDFSPLIRIYKDGRVERLEGEDTVAASIDPETRVESKDIAMAPEFNNVSARLYLPQNAKPGHRIPLLVYFHGGGFVVGSAFSPVYQEHLNSLVAEANVIVVSVNYRLAPEHPLPIAYEDSWLALKWIASHSKSGDGPEEWLKNYADFDRVYFGGDSAGGNIAHNMAFRFGIEELHGVNLNGIFLNCPYFWGNDPIANEAGRKGEKNFLDNLWFCICPSTTGLDDPRLNPAANPMISRLGCKRVLVYVGGKDVLKDRGWYYKEALEKSGWAGEVTVVEVEGEEHVFNLSSPRGANSLSMIKDLARFLNRN	---NA---	0	6.23	5	1	2	1	1	348	38.9	5.66	29	1	0	4.492	2.624	0.584	2.17	1.39	-0.78	0.062734	0.338096	0.832304	0.158652	0.549183	1	50.9	228.5	133.5	50.41	63.08	55.9	33.2	33.5	77.3	89.9	132.2	109.6	395	424	81.7	77.5	218.1	237.3	33.2	29.7
High	CDO98048	pep chromosome:AUK_PRJEB4211_v1:4:2454148:2456247:1 gene:GSCOC_T00022022001 transcript:CDO98048	MTGRQYRYDCEAVVDIAIKYVKSLSIPSDGRSIWIFDIDDTALSNLPFFSRPDVFFGVKTLNAELEAEFYEFVLTAEVPVLAATLRLYQAIVEAGIKAVFLTGSSERSADARAKNLKAVGYDTWEELILKPDSVNTTVQVFKSQVRNRLVVQGYRIEGNIGDQWADIVGSNVGRRTFKLPNPMYYGYY	Acid phosphatase 1; AltName: Full=Apase-1(1); Flags: Precursor	0	83.478	69	10	34	5	1	188	21.2	5.43	779	10	4	4.469	3.715	0.831	2.16	1.89	-0.27	3.61851e-07	1.89908e-06	0.739347	1.69339e-05	2.12848e-05	1	1061.9	4745.3	3945	19.01	9.03	9.85	1252.9	1185	951.6	823.7	5210.1	5015.6	4489.6	4299.4	4149.1	4408.6	3539.6	3751	1252.9	1051.1
High	CDP10334	pep chromosome:AUK_PRJEB4211_v1:3:12976080:12979534:-1 gene:GSCOC_T00031032001 transcript:CDP10334	MASLPPVPRTKLGSQGLEVSKQGLGCMGMSYMYGPPKPEPDMIELIRYAVDSGVTFLDTSDVYGPHTNEILIGKALKGGYREKVQIATKFGIGKKDGKTDIRGDPEYVRACCEGSLKRLDVECIDLFYAHRIDTRVPIEVTVGEMKKLVEEGKVKYIGLSEASASTIRRAHAVHPITAVQLEWSLWSRDLEEEILPTCRELGIGIVPYSPLGRGFFSAGPQLLDNLAEGDMRKNFPRWKPENLEENKKIFARVSEMAAKKGCTPAQLALAWVYHQGDDVVPIPGTTKKENFNQNVRALSVKLTREEMAELESYASADVVKGDRHVSMGTTWINSETPPLSSWKAK	---NA---	0	163.129	55	19	63	15	1	345	38.2	7.39	1347	19	0	4.446	7.102	1.597	2.15	2.83	0.68	0.00520878	0.000460875	0.70604	0.0193225	0.00191239	1	1245	5535.4	8841.4	12.98	4.95	7.44	1388.1	1398.2	1116.7	1106.7	5955	5682.6	5366.5	5392	9250.2	9451.5	8066.2	8450.7	1388.1	1240.2
High	CDP03474	pep chromosome:AUK_PRJEB4211_v1:3:20059764:20061468:1 gene:GSCOC_T00015260001 transcript:CDP03474	MALFSSNTFNSLALVLSLSIILNLLPSSFASNKRGIPQSDVDLLEFPLNLEYLEAEFFLWGSLGYGLDKIAPELTGKGPEPIGAKIAKLDPFVRDVVAQFAFQEVGHLRAIKSTVPGFPRPLLNISSESFATVINSAIGRTLEPPFDPYANDINYLIASYVIPYVGLTGYVGANPNLQSPAAKRLVAGLLGVESGQDAVIRALLFEQAYVKVKPYGITVAEFTDRISNLRNELGHAGLKDEGIVVKPSEGAEGRISGNVLAGDKDSLAFGRTPEEILRIVYGSGNESKPGGFYPKGAEGRIAQSHLRLNEALLNFN	Desiccation-related protein PCC13-62; Flags: Precursor	0	4.654	3	1	2	1	1	316	34	5.53	85	1	0	4.42	2.949	0.667	2.14	1.56	-0.58	8.9386e-05	0.00204562	0.452236	0.000859766	0.0065231	1	108.7	480.4	320.5	9.93	6.47	6.6	102	102	115.8	124.4	473	427.2	488	494.9	295.3	314.7	326.4	345.8	102	90.5
High	CDP07882	pep chromosome:AUK_PRJEB4211_v1:8:19578788:19581907:-1 gene:GSCOC_T00025369001 transcript:CDP07882	MELPSNLIAFFLFLAFVLALFKEWRRSQAAKKLPPSPSKLPIIGNMHHLIGSQPHQALTKLAQKHGALMHLQLGEISSIIVSSSHLAKEIMKTHDLSFANRSEILLSKIIMYNSSDIGFCPYGDYLRQVRKICALELLSAKKVQSFGSIRQDEALHLVKSIRNLADAGEVIHFTDKVHSYTCSTVCRAAFGKVSKDVHSKFLQLMCEIVPLSSTFDISDLLPSFKMLHPLLSVKRQLVKIHLKMDRLLVNIIDQHTNNLQRNMSTGEYGNEDLIDVLLRVKHSGDLQIPITNDNIKAIVIDVFSAGTETSSTTVDWAMSEMIRNPSVMAKAQSEIRTAFKGKQMFEEDDVQELKYLKLVIRETLRLHPPLPLLVPRECREECEIDGYVIPVQTRVLVNA…	Premnaspirodiene oxygenase; Short=HPO; AltName: Full=Cytochrome P450 71D55	0	16.453	9	3	4	3	1	556	63.1	9.01	64	3	0	4.396	4.702	1.07	2.14	2.23	0.1	0.00385956	0.00318337	0.999975	0.0148965	0.00953463	1	49.2	216.2	231.2	55.57	14.78	28.65	29.3	29.8	81.3	86.8	263.5	229.4	203.8	188.8	301.1	282.1	165.1	189.5	29.3	26.4
High	CDP02505	pep chromosome:AUK_PRJEB4211_v1:7:4403744:4407903:1 gene:GSCOC_T00039905001 transcript:CDP02505	MQACKIFNLQNFFFRRITISINPYNSSSLQHIYCLNLFWSLQVLFSKLLFIALCLLLPLASCLQIGETCSNSSSSSNTCDAGLICGSCPVNGNTRPRCTRIQPLNPTSKVKGLPFNRYSWLTTHNSYALSGSNSATGSVILAPTNQEDTVTNQLQNGVRGLMLDMYDFNNDIWLCHSFGRKCYNFTAFQPAINVLKEIQVFLEENPTEIVTIFIEDYVQSPQGLTKVFNASGLSKYWFPVSRMPKGGQDWPTVDDMVQQNQRLVVFTSISSKEATEGIAYEWKYVVENQYGDGGMINGSCPSRSESSPMDTKTISLVLENFFPTNPNTNITEACANNSAPLVSMTRTCYKAAGNRWPNFIAVDFYQRSDGGGAPEAVDEANGHLTCGCDSIAYCKANAT…	---NA---	0	14.429	7	3	5	3	1	456	50.2	6.51	106	3	0	4.377	2.822	0.645	2.13	1.5	-0.63	0.00789304	0.0752731	0.759545	0.0273614	0.152919	1	276.4	1209.6	780	29.62	59.78	57.71	350.5	342.2	190	223.2	2174.7	2127.2	679.7	687.8	1363.9	1333	456.4	443.5	350.5	303.5
High	CDP19578	pep chromosome:AUK_PRJEB4211_v1:5:18696811:18699100:-1 gene:GSCOC_T00007005001 transcript:CDP19578	MDVAINVKQQKHFVLVHGACHGAWCWYKLKPLLESAGQRVTAIDLSAAGINPKRLEEVYTLEDYSLPLLELMASIPPTEKVVLVGHSYGGMNLALAMENYPEKISVAMFVTALVPDIVRPLSYPLEQFFAGETPEMELDREVSSYGAPEKGGKSLHFGPIYLSTRLYELCSVEDLELAKSLARPTLLLVDDLGKEKPFSAEKYGSVKRAYILCKEDKTISLDIQRSQIENIGMTEVKEIEDAGHMVMLSKPQELCQNLLEIALKYT	Polyneuridine-aldehyde esterase; AltName: Full=Polyneuridine aldehyde esterase; Flags: Precursor	0	25.836	22	5	12	5	1	266	29.7	5.27	163	5	0	4.37	6.886	1.576	2.13	2.78	0.66	0.012413	0.00111262	0.721323	0.0401821	0.00387629	1	272	1188.7	1873.1	47.97	29.08	38.85	410.5	432.8	169	180.2	946.9	857.9	1492.4	1518.2	1331.2	1319.3	2635.5	2700.3	410.5	383.9
High	P08216	Malate synthase, glyoxysomal OS=Cucumis sativus OX=3659 PE=2 SV=2	MGSLGMYSESGLTKKGSSRGYDVPEGVDIRGRYDEEFAKILNKEALLFIADLQRTFRNHIKYSMECRREAKRRYNEGGLPGFDPATKYIRDSEWTCAPVPPAVADRRVEITGPVERKMIINALNSGAKVFMADFEDALSPNWENLMRGQINLKDAVDGTISFHDRVRNRVYKLNDRTAKLFVRPRGWHLPEAHIFIDGEPATGCLVDFGLYFFHNHANFRRSQGQGYGPFFYLPKMEHSREAKIWNSVFERAEKMAGIERGSIRATVLIETLPAVFQMNEILYELRDHSVGLNCGRWDYIFSYVKTFQAHPDRLLPDRVLVGMTQHFMRSYSDLLIRTCHRRGVHAMGGMAAQIPIRDDPKANEVALELVRKDKLREVKAGHDGTWAAHPGLIPACMEV…	Malate synthase, glyoxysomal	0	8.715	7	3	3	2	1	568	64.9	8.24	51	3	0	4.34	3.927	0.905	2.12	1.97	-0.14	0.00344672	0.00529651	0.999391	0.0136606	0.0147653	1	61.4	266.5	241.2	30.2	15.31	17.54	75.7	86.5	46.6	49.8	292	294.3	243.3	212.1	278.2	282.2	209.1	203.8	75.7	76.7
High	CDP13576	pep chromosome:AUK_PRJEB4211_v1:5:28975879:28979943:-1 gene:GSCOC_T00038573001 transcript:CDP13576	MATKKSVGSLKEADLKGKKVFVRVDLNVPLDDNFNITDDTRIRAAVPTINYLIGCSAKIILASHLGRPKGVTPKYSLKPLVPRLSELLGVEVIIANDCIGEEVEKLVASLPEGGVLLLENVRFHKEEEKNDPEFAKKLASLADLYVNDAFGTAHRAHASTEGVAQYLKPAVAGFLMQKELDYLVGAVANPKKPYAAIVGGAKVSTKIGVIESLLAKVDILLLGGGMIFTFYKAQGHSVGSSLVEEDRLDLALSLIEKAKAKGVPLLLPTDVVAADKFAPDANSKVVPASGIPDGWMGLDIGPDAIKSFSEALDATKTIIWNGPMGVFEYDKFATGTEAIAKKLAELSGNGVTTIIGGGDSVAAVEKVGLADKMSHISTGGGASLELLEGKSLPGVLALD…	Phosphoglycerate kinase, cytosolic	0	134.45	44	17	59	7	1	401	42.1	5.8	1368	17	2	4.302	1.638	0.381	2.1	0.71	-1.39	0.0361609	0.81035	0.24175	0.0980519	1	0.740494	1392.9	5991.7	2281.2	58.87	61.76	54.57	2382	2539.3	788.4	814.5	11170.3	10762.1	3318	3335.8	3791.9	3838.9	1361.1	1372.4	2382	2252.4
High	CDP20787	pep supercontig:AUK_PRJEB4211_v1:scaffold_1757:6193:7525:1 gene:GSCOC_T00006599001 transcript:CDP20787	MGSKTLLFFCISLAIVLTIASQVAARELAETTTSAENSKTDETTGVEEGKYGGGYGGYGGYPGYGGYGGRGGYGGYGGRGGYGGYGGRGGYGGYGGRGGYGGYGGRGGYGGYPGGGYGGRGGYGGYPGGGYGHGGYPGQAVDAEPQN	Glycine-rich protein DC7.1; Flags: Precursor	0	26.352	31	3	6	3	1	147	14.3	8.03	436	3	0	4.24	32.514	7.669	2.08	5.02	2.94	0.379749	0.00203627	0.0636566	0.677507	0.00649749	0.288339	17.7	75.2	577	77.87	83.91	70.06	7.8	9.5	46.7	33.3	32.9	22.8	171.9	178.6	289.3	284.3	1151	1190.5	7.8	8.4
High	CDP14701	pep chromosome:AUK_PRJEB4211_v1:5:21096797:21098392:1 gene:GSCOC_T00042119001 transcript:CDP14701	MRKMSYSTMLQFAFLLLCSISWASASHPSRGDFVQCLLNYTDSPSYFAKAIYTQNSSSFTSVLDQYIHNLRFLLPEVPKPLVIITALTENQIQTAIFCSKKYRLQMRIRSGGHDFEGSSYTSNVPFFVLDMSNFRSISIDVKGQTAWVGAGATVGEVYYSIYEANSTLGFPAAYCPTVGIGGHISGGGYGPLVRQFGLAADNVIDARVIDANGTVLDRKSMGEDLFWAIRGGGGASFAVILGYKLKLVEIPEKVTVFSINRTWEQNATQLLYKWQYIAPKLPLNLVITPQIVSINSNQTGKRTVQVTFVSVFRGEVDELLSIMNQQFPELGLKKEDCTEMLWIQYFAYASGLPTSNITESLTSRVSSAKLYYKAKSDFVKEPIPENGIEEILRKLNELP…	Tetrahydrocannabinolic acid synthase; Short=THCAS; AltName: Full=Delta(1)-tetrahydrocannabinolic acid synthase; AltName: Full=THCA synthase; Flags: Precursor	0	14.326	10	4	6	3	1	531	59.6	8.57	120	4	1	4.222	4.341	1.028	2.08	2.12	0.04	0.00519067	0.00459253	0.999996	0.01927	0.0131331	1	168	709.1	729.1	62.9	27.11	26.34	322.5	302.4	91.5	93.3	590.6	547.6	851.3	959.4	583.6	578.1	936.2	910.9	322.5	268.2
High	CDP01294	pep chromosome:AUK_PRJEB4211_v1:10:3763309:3767223:1 gene:GSCOC_T00034889001 transcript:CDP01294	MATLSLLLLFSLLSFSSAEDMSILSYGNANLKTSGSGRTDEEVMALYEEWLVKHGKSYNGLGEKDKRFEIFKDNLRYIDEQNSLPSRTYQLGLNRFADLSNEEYRSTYLGTRPDPKRRLAKTSSDRYRPKVGDSLPNSIDWREKGAVLPVKDQGSCGSCWAFSAVAAVEGINQIVTGDLISLSEQELVDCDTSYDEGCNGGLMDYAFEFIINNGGIDTEEDYPYRGRDMTCDTYRKNARVVTIDGYEDVIPYDERALQKAVANQPVSVAIEGSSRDFQLYLKGLFTGNCGTALDHGVNVVGYGTANGKDYWIVRNSWGAEWGEDGYIRMERNVKATSGLCGITSEPSYPVKKGPNPPNPGPSPPSPIKPPAACDNYYECPQDNTCCCVFEFYGSCFEWG…	Oryzain beta chain; Flags: Precursor	0	73.255	18	7	108	7	1	465	51.4	5.16	2657	7	0	4.208	2.886	0.686	2.07	1.53	-0.54	8.59945e-08	4.51701e-06	0.0615616	4.92394e-06	4.34223e-05	0.281209	2362.8	9941.5	6818.1	17.43	13.27	17.72	2026.7	2046.3	2728.2	2789.6	9001.4	8672.9	11240.1	10979.8	5922.3	5736.5	8018.5	7849.4	2026.7	1815.1
High	CDP02506	pep chromosome:AUK_PRJEB4211_v1:7:4409333:4420317:1 gene:GSCOC_T00039906001 transcript:CDP02506 description:DNA polymerase alpha catalytic subunit [Source:Projected from Arabidopsis thaliana (AT5G67100) UniProtKB/Swiss-Prot;Acc:Q9FHA3]	MSDEEPRVAGRRRSRGAQATARADALQRLKALRSGCRRPTEGGATFNIKMEDPIYDTVDEEEYKELVATRREEAKDFIVDDDGLGYVDEGQEEDWSRAGVPLSSEESDGELERPKRKKNNKSNTTAEKEQQSTKKSSALSAAAALMGKQRISNMFTSSVFKKNRDDNKGKNTLSCESIVDDVIAEFAPDEADRERRKKATSRLLSNSISSVPLNSNFMSVKFDNAVNDCVDSSVRHEDTGFRNSNSEFLVNNLQKSHVDEEKNVMLENGKENEGIVKLKDDKLQQEVKLDERVFTLNAKIKEETDSALSATAGWQAVRTAGNEAVSSNGSGVNQSLNNEDKSDFELNSDGSLPFYILDAHEEFYGANSGNLYLFGKVKSGDTYYSCCVVVKNMLRCVYA…	DNA polymerase alpha catalytic subunit	0.002	2.616	1	1	3	1	1	1538	172.1	7.55	24	1	0	4.204	3.501	0.833	2.07	1.81	-0.26	0.00955747	0.0244474	0.987516	0.032047	0.0569227	1	101.7	427.5	356	40.17	34.97	40.7	73.4	67	148.2	140.9	308.8	317.1	576.4	592.3	240.7	256.5	538	494.2	73.4	59.4
High	CDP11782	pep chromosome:AUK_PRJEB4211_v1:5:19006749:19011427:1 gene:GSCOC_T00035016001 transcript:CDP11782	MDSSSNDAGQPLLPRTNTQISKELEEILCDNEQPLLQRYRAATWIEMKLLFHLAAPAVIVYMINYLMSMSTQIFSGHLGNLELAAASLGNTGIQIFAYGLMLGMGSAVETLCGQAFGAKKFEMLGIYLQRSTILLSLTGVLLTIIYVFSKPILIFLGQSPDIASAAALFVYGLIPQIFGYAVNFPIQKFMQAQSIVQPSAYISTATLVLHLVLSWLVVYKIGLGLLGASLVLSISWWIIVIGQFIYIVKSEKCKKTWTGFTLQAFSGLWGFFKLSAASAVMLCLEAWYFQILVLLAGLLPNPKLALDSLSICTTISGWVLMVSVGFNAAASVRVSNELGAGHPKSAAFSVVVVNVISFIICVIAAIVILALRRVMSYAFTEGEVVADAVSDLSPLLALT…	Protein DETOXIFICATION 40; Short=AtDTX40; AltName: Full=Multidrug and toxic compound extrusion protein 40; Short=MATE protein 40	0	5.343	3	1	2	1	1	524	57.4	8.76	61	1	0	4.201	5.88	1.4	2.07	2.56	0.49	0.000538744	7.16158e-05	0.694994	0.00332539	0.000399518	1	78.9	331.5	464	33.19	16.93	11.87	98.6	114.9	57.5	63.2	391.7	379.7	285.4	289.4	502	515.2	402.8	429	98.6	101.9
High	CDO98140	pep chromosome:AUK_PRJEB4211_v1:4:3192576:3195712:-1 gene:GSCOC_T00022143001 transcript:CDO98140	MEWVAETVESIKSFQIRKALNDAVSFGMIISSALIIWKALMCITGSESPVVVVLTGSMEPGFKRGDILFLHMNNDPIRAGEIIVYNVDGRSIPIVHRVIKVHERKDTGEVNILTKGDANPGDDIGLYAPGQRWLEQRHIMGRAVGFLPYVGWVTIIMTEKPIVKCVLIGVLGLLVITSKD	---NA---	0	8.035	16	2	3	2	1	180	19.9	7.44	71	2	0	4.198	5.29	1.26	2.07	2.4	0.33	0.000621802	0.000152454	0.917842	0.00372928	0.000746229	1	60.9	255.6	322	40.9	17.97	15.63	85.5	90.5	40.9	43.3	316.1	289.1	220.3	226	288	276.9	360.2	378.5	85.5	80.3
High	CDP04065	pep chromosome:AUK_PRJEB4211_v1:1:33098254:33100732:1 gene:GSCOC_T00016604001 transcript:CDP04065	MVSVTLLMVMCSMISFASAQLSTSFYSKSCPKVLGTIRSEVQSAVSKERRMGASLVRLFFHDCFVQGCDASILLDDTSSFKGEKTAFPNINSVRGFGVIDNIKEKVEKVCPGVVSCADIVAIAARDSIVILGGPSWDVKLGRRDSKTASLSQANSGRLPGPASTLANLINRFQAVGLSAKDMVALSGAHTIGQARCTNFRTRIYNETKIDTSFAKTRRSQCPATVGRGDNNLAPLDLQTPTGFDTKYFQNLINKKGLLHSDQVLYNGGSTDSLVEKYSKDSKTFNSDFVKAMIKMGDINPLTRSQGEIRKKCRKLN	Peroxidase 4; Flags: Precursor	0	41.09	34	5	11	5	1	316	34.3	9.48	198	5	0	4.181	1.124	0.269	2.06	0.17	-1.9	0.0124035	0.999457	0.0188318	0.0401756	1	0.123229	310.4	1297.7	348.9	11.74	6.7	10.82	308.8	311.9	288.3	375.4	1237.8	1220	1394.7	1360.6	382.5	376.5	323.3	307.7	308.8	276.7
High	CDP03948	pep chromosome:AUK_PRJEB4211_v1:1:33951092:33952015:-1 gene:GSCOC_T00016460001 transcript:CDP03948	MVYFDQQQVKKICSSGYSCHFFSRNRQLAGNRDAQIFSPIKNIAALRKQMQVKIATTEIRNMALSRFIFLLWILSSCIFAVLADVSVENCSDNSTIPTAQMSANIDSLVAELASSTSQNRFSIATYGKGTDKVYGLGQCRGDVNSTDCTTCIQDAAKNIRTNCQNQTDAWLWQNDNCILRFDDDQFFGNVDPSSFANLYNNDHPQHPSAFKKQLDALISKVSSEAVVPANEGLGRGKSFSVASNDTIYALTQCTRDLSRHSCSECLNIAIGNFPKFCNNEKTVGCRVLYGSCYVRYEIYPFYYPLDS	Cysteine-rich repeat secretory protein 55; Flags: Precursor	0	27.232	22	6	18	5	1	307	34.3	7.43	409	6	1	4.16	1.734	0.417	2.06	0.79	-1.26	1.26324e-06	0.0230526	0.000334146	4.69327e-05	0.0540195	0.00634094	1733.2	7210.7	3005.4	3.88	6.76	10.15	1836.6	1693.6	1769.4	1697.8	7932.5	7339	7084.7	6771.5	3278.2	3278.3	2741.4	2755.4	1836.6	1502.2
High	CDP05944	pep chromosome:AUK_PRJEB4211_v1:5:25803427:25809239:-1 gene:GSCOC_T00021268001 transcript:CDP05944	MNLSPYLLIYTQYACNCADIWSLGITVIEMAKGEPPLADLHPMRVLFIIPRENPPQLDDHFSRLMKEFVSLCLKKNPAERPSAKELLKHRFIRNARKSPRLLERIRERHKFQAKEDVETPRNGIKPFGEASGTMKVTRDAGVEDTVRISGQGKTLRNAGWDFSLGATPGTGTVRSAVRPPQVRDRKPEAFLSQASSRKILDSGNQWSSASGKDARDAYQDDKQDYYHEDEELSVGGTGTVVVRSPRRVSPSSLFSDQSSLSSSTYNSVEDSSTSGTVVYRGQHDDSDSPRKSRLGIQERTSSASVEDSSINLAEAKAAIQAGLKKGNMRERSMLGKANRDEQESKRREQSSSDLSRHTEEYLDAQKALPRSHQTSDEEDAARSSAASSSAPLSILLIPS…	---NA---	0	3.779	2	1	2	1	1	513	56.9	9.01	48	1	0	4.159	2.81	0.676	2.06	1.49	-0.57	0.0985088	0.314295	0.9453	0.229644	0.515446	1	36	149.7	101.1	8.63	82.91	74.98	33.3	33.8	38.3	39.5	55.7	66	339.6	387.8	48	45.9	227	213.1	33.3	30
High	CDP06551	pep chromosome:AUK_PRJEB4211_v1:6:1620821:1622798:1 gene:GSCOC_T00023442001 transcript:CDP06551	MVKDRKIGVAIDFSKSSKLALQWAIENLADKGDTFFVIHVNSHPLDESRNQLWSQSGSPLIPLVEFREPEVMKQYGVKTDIEVLDMLDTAARQKEIIIVWKLYWGDAREKLCQAVEDLKLDSVVMGSRGLSSIRRIILGSVTDYLLANATCPVTVVKDPDLHRH	Universal stress protein PHOS32; AltName: Full=Phosphorylated protein of 32 kDa; Short=AtPHOS32; Flags: Precursor	0	16.675	29	3	10	3	1	164	18.5	6.55	260	3	0	4.148	3.467	0.836	2.05	1.79	-0.26	0.000956013	0.00316243	0.96169	0.0052017	0.00948056	1	408.9	1696.2	1417.4	29.87	40.03	38.13	314.9	316.3	528.4	542.7	1198.6	1139.8	2400.2	2417.4	979.3	1017.1	1988.9	1975.2	314.9	280.6
High	CDO99537	pep chromosome:AUK_PRJEB4211_v1:2:11512899:11519353:1 gene:GSCOC_T00029162001 transcript:CDO99537	MAACNKLLASSTRFLLNVKPFQRRKKLSTFNSILPNYTRKPLEYSSKAILGHAETCSAEENLAKAEKDEPSRTISLSAIVTLKYANPTDLKDVIFQLMNASSTTNGRGVVLQLVSSELDPHTREPKLSREAVLNMSNSNGPSSGSSDHQTFRIQFTVDHNFGVPGAIMVYNKYEKEFFLISISVEGFVNFDCKSWIQPEKVNSRPRVFFSNKAYLPFQTPAGLKKLRERELQELRGDGTGTRLASDRIYDYDVYNDLGDPDKGIERVRPTLGGQQNPHPRRCRTGRPPTIVATNEYPTVNYANRTQLDENQLGSPHRRAMINFLYANAEIPASCSKPVYVPRDEEFEESKNRYVSTGKLKAVFGYLMFSLVPNLYSDVTNLKIKLPHYQNNSPPEISFS…	---NA---	0	6.992	3	2	3	2	1	938	106.4	6.8	64	2	0	4.139	5.122	1.238	2.05	2.36	0.31	2.77747e-05	6.93773e-06	0.871475	0.000365349	6.30081e-05	1	62.2	257.4	318.5	21.57	12.98	25.41	75.8	71.6	54	48	227.4	240.7	302.4	275.3	240.9	260	390.2	391.8	75.8	63.5
High	CDP13563	pep chromosome:AUK_PRJEB4211_v1:5:29050422:29055057:1 gene:GSCOC_T00038554001 transcript:CDP13563	MALSSSSSLVRSTPSPVLQASRFGSSYHQPQVFGAIGANVRFQSSIHGNRILAQSSSLQKCSTTARSIQPIKATATEIPPTISKSSSGGKTKVGINGFGRIGRLVLRIATSRDDIEVVAVNDPFIDAKYMAYMFKYDSTHGAFKGSLRVLDDTTLEINGKQIKVCSKRDPADIPWGEHGADYVVESSGVFTTVGKASAHKRGGAKKVVISAPSADAPMFVVGVNESTYKPSMDVVSNASCTTNCLAPLAKVVHEEFGILEGLMTTVHATTATQKTVDGPSMKDWRGGRGAGQNIIPSSTGAAKAVGKVLPELNGKLTGMAFRVPTPNVSVVDLTCRLEKSASYEDVKAAIKYASEGPLKGILGYTDEDVVSNDFVGDSRSSIFDAKAGIGLSSSLMKLV…	Glyceraldehyde-3-phosphate dehydrogenase GAPCP2, chloroplastic; AltName: Full=Glyceraldehyde-3-phosphate dehydrogenase of plastid 2; AltName: Full=NAD-dependent glyceraldehydephosphate dehydrogenase chloroplastic 2; Flags: Precursor	0	62.888	23	6	22	6	1	426	45.1	8.87	677	6	0	4.044	5.224	1.292	2.02	2.39	0.37	5.89853e-05	7.24782e-06	0.691911	0.000628187	6.52833e-05	1	850.3	3438.3	4442.4	20.77	22.76	22.85	714.9	724.7	997.8	1064.4	2863	2704	4129.3	4159.7	3680.1	3580.5	5362.6	5472	714.9	642.8
High	CDP18267	pep chromosome:AUK_PRJEB4211_v1:10:24622316:24625946:-1 gene:GSCOC_T00011992001 transcript:CDP18267 description:Nuclear speckle RNA-binding protein A [Source:Projected from Arabidopsis thaliana (AT1G76940) UniProtKB/Swiss-Prot;Acc:A1A6K6]	MGDPYWNRQSGMQPPAAGGGMLKRHRSDYDVPPSRMTLGHEMHNYLAPDDDRGGPRIVKDTKTLGSAYDRYLQNSQLSLNSGEGNNYGGAALRAVGSGMPTLPIRDPVSSGRPGTGGPELAPSSRRVGYSGQLPVEEIPRTRETLPLPPDASSTLYIEGLPPDSTKREVAHIFRPFVGYKEVRLVTKESKHRGGDPLILCFVDFADPACAATALSALQGYKMDEHDPDSSYLRLQFSRFPGPRSGPGFRGKR	RNA-binding protein 2	0	5.191	6	1	2	1	1	252	27.4	8.95	62	1	0	4.033	2.083	0.516	2.01	1.06	-0.95	5.42537e-06	0.00446236	0.00769292	0.00011658	0.0128129	0.0632356	98.7	398.1	205.6	2.95	17.34	8.57	100	94.9	97.4	101.5	357	341.7	490.1	443.9	185.4	194.6	217.1	221.9	100	84.2
High	CDO97479	pep chromosome:AUK_PRJEB4211_v1:2:19363015:19368029:1 gene:GSCOC_T00014831001 transcript:CDO97479	MLTLQEKVANLVDGAAGVSRLGIPKYEWWSEILHGVSNTGPGVHFTSLVPGATSFPQVILTAASFNKSLFEIIGKVVSTEGRAMYNVGLAGLTYWSPNVNIFRDPRWGRGQETPGEDPTLTSNYAAAFVRGLQQRDDGDKDRLKVASCCKHYTAYDLDNWKGIQRYTFNALVTQQDLDDTFQPPFKSCVLDGNVASVMCSYNQVNGKPTCGDPDLLSGIVRGKWNLNGYIVTDCDSLDVIFNNQHYTKTPEETVALTLNAGVDLNCGSFLAKNGVSAVNKGLVNESVIDRALTNNFATLMRLGFFDGDPKKQLYGNLGPKDVCTPENQELAREAARQGIVLLKNTAGSLPLSPAVIKSLAVIGPNAQATHTMLGNYEGVPCKYVTPLQGLSASVSTVFQ…	Beta-xylosidase/alpha-L-arabinofuranosidase 2; AltName: Full=Xylan 1,4-beta-xylosidase/Alpha-L-arabinofuranosidase 2; Short=MsXyl2; Includes: Beta-xylosidase; AltName: Full=1,4-beta-D-xylan xylohydrolase; AltName: Full=Xylan 1,4-beta-xylosidase; Includes: Alpha-L-arabinofuranosidase; Short=Arabinosidase; Flags: Precursor	0	105.39	38	15	55	15	1	706	76	7.09	839	15	0	4.007	0.473	0.118	2	-1.08	-3.08	0.000453433	0.0548176	3.07872e-06	0.00293292	0.116172	0.000221577	1476.3	5915.7	698.3	22.37	29.77	12.44	1219.3	1222.1	1829.2	1783.5	4663.9	4405.2	7828.3	7503.5	750.2	799.6	610.6	650	1219.3	1084
High	CDP08351	pep chromosome:AUK_PRJEB4211_v1:8:26320538:26322184:-1 gene:GSCOC_T00027156001 transcript:CDP08351	MAACNGNGPFGSKLEFHAIQTVMPVKPTDPRKSTRVCLSENPISGIFFRCFNVLLCYQKVASEEEDSGIASGSLVAGWIRESLGWALSEQPMLAGRLRRNQDVEGELEMVSNDSGVRLIEAQLAMTLSEFLDLKDKKKAEAELVYWEGLDREQNPQFSPLFYVQVTSFKCGGYSIGISCSLLLVDPVAMTSFLKRWRDIHVEMVSRTDVPKIPIFYRPNLRNPGPLPGLSIGSSKKAYAAKTMIFTIANKVLDLDSEIHNKFAAACIDEAEYKLGYKTAPSLNFSFLVKEPSEEVNVRNFTREGLVQKPSTTVNGIHTCSTWDDLGVTEIWFEEGNRPAHVSCWINSVPDEALVMIIPSPEKDGSGMKIVVTLPH	Protein ECERIFERUM 26-like; Short=CER26-like; AltName: Full=CER2-like protein 2; Short=CER2-like2	0	66.584	42	11	25	11	1	375	41.6	5.76	723	11	0	3.987	9.425	2.364	2	3.24	1.24	3.46074e-05	8.20034e-08	0.00472151	0.000428359	1.6439e-06	0.0439829	422.8	1685.5	3984.8	7.11	0.55	7.61	424.2	374.7	421.4	444.8	1697.3	1688.3	1682.6	1675.2	4228.1	4275.5	3755.4	3701.6	424.2	332.4
High	CDO99938	pep chromosome:AUK_PRJEB4211_v1:2:7632474:7636423:1 gene:GSCOC_T00029660001 transcript:CDO99938	MAEGAVVEGLKLEQRHGKERVRVGRVWRDVDGTHHFVEWNVSIGLLSDCIPAYVTGDNSNIVATDTMKNTVYVKAKECSERIPVEVFAIKLANHFSTFYHPVTTAIVNIAEKQWERVSVDGQSHKHGFKLGSEEHTTEVVVKKCGALQVASGIGKLKLLKTTQSGFEGFIRDKYTMLPDTQERLLGTEVTASWRYAFDSLENIPVQPLYFFNSYTGVKKVLVDTFFGTPKMGVYSPSVQYTLYEMAKAVLGRFHDLSSVDLKMPNIHFLPVNLSSKDNPVIVKFEDDVYLPTDEPHGAIEASLSRIRSKM	---NA---	0	7.903	9	2	3	2	1	310	34.8	7.34	48	2	0	3.987	2.417	0.606	2	1.27	-0.72	0.111902	0.442013	0.88521	0.254914	0.68644	1	113.3	451.6	273.8	46.23	75.01	72.75	166.5	182.3	77.1	73.2	945.3	935.7	217.9	182.2	563.4	584.2	127.7	133	166.5	161.7
High	CDP10711	pep chromosome:AUK_PRJEB4211_v1:10:9993491:9996501:-1 gene:GSCOC_T00031512001 transcript:CDP10711	MAEETKTTAAEAPAEVVVSDVQAVVEKESMVGPQPEPDPVPKSEAAMEKPAEEAAVETLEAEAEKAEEKIAESASFKEETNVVEELPDPQKKAIDEFKKLIREALDKHEFTAPPPPPPAAPAKEEEKKPEPEEEKKPEPEAEAAASAAATEEVKPTEEVEKKEGVEETKTEEKKEAEAEAPAAQVTPPVSEEPPKPEAEPVVEEKKEVITPPSAAPQPAPVVAAKVEEKAETEEIKETIVEETTPPAAPAPEAAAQVEEQPKEEPKEEVVEEPKGPEEVSIWGIPLLADERSDVILLKFLRARDFKVKDAFSMLKSVVAWRKEFGIEGLLEEEGVGSGLEKVVYMHGVDKEGHPVCYNAFGEFQDKELYQNAFADADKRSKFLRWRIQFLEKSIRKLDF…	Patellin-3	0	190.523	60	24	61	24	1	620	68.7	4.78	1255	24	0	3.985	1.026	0.258	1.99	0.04	-1.96	3.9056e-09	0.999495	4.83418e-09	4.32013e-07	1	1.20433e-06	4698.1	18720.4	4822.4	11.13	16.14	14.32	5273.6	5134.5	4298.7	4288.8	22276.6	21260.7	16460.5	16483.5	5484.4	5449.1	4267.8	4253.2	5273.6	4554.4
High	CDP07872	pep chromosome:AUK_PRJEB4211_v1:8:19329878:19331686:-1 gene:GSCOC_T00025349001 transcript:CDP07872	MDLPLNFTAFFLFIAFVLTLIKVLKRSKTAQKLPPSPWKLPIIGHMHHLSGSPPHHALRKLAQKYGPLMHIQLGEISSIVVTSPRLAKEIMKTHDLAFANRGETLAGKIMLYNCSDIACCPYGDYWRQMRKICTLELLSSKSVRSCGSIRQEEALHLVSSIKALANAGKSIDVTEKMSSYASAVLYRAAFGKVSNDDHFAFFQLIKESSSIASAFDVSDLLPSFKILHPFLSVKNKMLNIRYKLDKVLDKIIDQHMDNLARTKIATGASDNEDIIDVLLRVKESGELQIPLTKDNIKAVLSDVFAGGTETSSTTVEWAMSEMIRNPGVMAKAQSEIRNAFRGKNTIEETDIQRLQYLRSVIKETLRLHPPIPLLIPRECREECEIDGYIIPVKTRVLVN…	---NA---	0	12.351	9	3	6	1	1	504	56.6	7.93	98	3	1	3.951	8.208	2.078	1.98	3.04	1.05	0.000121249	1.12597e-06	0.0235044	0.00106519	1.38128e-05	0.142374	75.7	299.2	621.6	23.54	21.99	19.03	90.4	97.2	63.4	61.3	240.7	250.2	357.7	363.5	534.5	507	727.5	722.8	90.4	86.2
High	CDP02582	pep chromosome:AUK_PRJEB4211_v1:7:5014119:5016354:1 gene:GSCOC_T00040013001 transcript:CDP02582	MDRHRLSNVVITVFSLSLVACLSPDLVSAQLKRNYYANICPNVESIVRNAVTQKFQQTFVTVPGTLRLFFHDCFVNGCDASVIIASTPNNKAEKDHPDNLSLAGDGFDTVIKAKAAVDAVASCRNKVSCADILAMAARDVIALAGGPSYAVELGRLDGLSSTASSVNGKLPQPSFNLNQLNAIFAAHGLSQTDMIALSGAHTVGFSHCNRFANRIYNFSPQNPIDPTLNRAYASQLQAMCPRVVNPTIAINMDPTTPRTFDNVYFQNLVTGKGLFTSDQVLFTDSRSKPTVNAWASNPQAFQNAFVAAMTKLGRVGVKTGRNGNIRRDCGAFN	Peroxidase 73; Short=Atperox P73; AltName: Full=ATP10a; AltName: Full=PRXR11; Flags: Precursor	0	120.822	57	16	44	16	1	333	35.9	8.81	1376	16	0	3.93	0.6	0.153	1.97	-0.74	-2.71	0.0096066	0.613555	0.000615498	0.0322006	0.872225	0.00955299	2570.9	10104.8	1541.7	31.1	37.92	47.36	3395.7	3339.4	1979.2	1900.3	14461.5	13933.7	7328	7046.3	2361.9	2426	997.4	1006.3	3395.7	2962.1
High	CDO99212	pep chromosome:AUK_PRJEB4211_v1:3:4308949:4311082:1 gene:GSCOC_T00026280001 transcript:CDO99212	MFRYNKVTFDRSQMKKSVAWGDCISCEFDHLPADFPELPGEFRNPMSEYMNCVNTLGMTLFELLSEALGLRKGYLKDIGCAEGLYFVGHYYPPCPEPELTLANFVHNDLAFLNMLLQDQIGGLQVLYQNQWVDVTPVPGAMVVDFGDMMQLITNDKFKSSKHRVLAKEVGPRISVANFMVPANNEVVTSRMYEPIEELLSDENPPIYKRTTIKDCMAQLFSNYISGDRSSALLHFKI	Deacetoxyvindoline 4-hydroxylase	0	35.441	27	4	11	4	1	237	26.9	5.3	132	4	0	3.926	5.59	1.424	1.97	2.48	0.51	0.00346403	0.000440733	0.777185	0.013718	0.00184506	1	301	1181.8	1682.4	4.58	27.72	34.46	279.7	305.5	296.5	310.9	1589.6	1435.4	973	900.9	2315.3	2276.5	1238.2	1243.3	279.7	271
High	CDP12237	pep chromosome:AUK_PRJEB4211_v1:8:31281604:31287954:1 gene:GSCOC_T00035663001 transcript:CDP12237	MNSPTRYVAMLFLLMLLGSLLGSNVASAHIGIQPLSKIAIQKTTLALTDSAAIKASPIVLGLKGEDSEWVTVRFKNSAPSRYDWIGVFSPANFNGSICSSENPKEATPYLCTSPIKYQFANFSSSSYIKTGEASIKFQLINQRADFSFALFSGGLSNPSLLAVSNHITFANPKAPVYPRLAQGKSWNEMTVTWTSGYNIDEAIPFVEWGLKRQNQRRSPAGTLTFQQNSMCGSPARTVGWRDPGFIHTSFLKDLWPNTLYSYKMGHLLPNGSYVWSKVYSFRSSPYPGQNSLQRVIIFGDMGKGERDGSNEYNNYQPGSLNTTDQLIKDLNNIDIVFHIGDITYANGYISQWDQFTSQIEPIGSRVPYMIASGNHERDWPGTGSFYNGMDSGGECGVLA…	Probable inactive purple acid phosphatase 27; Flags: Precursor	0	37.661	14	9	15	8	1	617	69.3	7.36	255	9	0	3.917	1.934	0.494	1.97	0.95	-1.02	0.00017353	0.0591739	0.0496592	0.00140294	0.123077	0.242213	386.8	1515.1	747.9	16.35	5.68	8.07	451.2	442.5	338.1	334.2	1593.8	1566.2	1465.6	1410.6	779.4	834.6	717.7	700.8	451.2	392.5
High	CDP11536	pep chromosome:AUK_PRJEB4211_v1:10:27161415:27164474:-1 gene:GSCOC_T00033835001 transcript:CDP11536	MDAVREEEEHEVVIVGGGIGGLATALALHRKGLRSVVYERSESLRAEGSAITILRNGWRALDQLGVGDVLRDKAILVQGGQGIWVDEGNQQQPIPIPGGEARCLKRSDLIKALADALPPETVRFGYKVVAVTMDPENMFPTLTLNNGSSIRAKVLIGCDGSNSVVADFLGIKPTRLFALCSVRGLTSYPNGHVFSPELVRIKRDRVMVGRIPVDNNLVYWFVSVPLSWLDRKFPDDPELIRKLTTKITEGFPSDAVEMIEGSDLDSLSITHLRYHAPWEMLVGRFRRGPITVAGDAMHAMGPFLGQGGSAALEDAVVLARNLGRKIASLSPYERGKEIMTDKIGQAFDQYVEERRMRMVRLATQAYLTGLILGSPPMSITKFIAVIIMAILFRDRNEHA…	---NA---	0	13.919	13	3	5	3	1	406	44.6	7.85	161	3	0	3.907	4.234	1.084	1.97	2.08	0.12	0.00424586	0.00163945	0.986517	0.0162139	0.00539896	1	82.7	323	350.1	38.5	19.27	38.22	50.8	62.8	115.8	108.9	341.7	219.9	345.9	305.4	257.8	235.2	475.4	501.7	50.8	55.7
High	CDO97637	pep chromosome:AUK_PRJEB4211_v1:2:20564250:20573986:1 gene:GSCOC_T00015035001 transcript:CDO97637	MLVNGSDNGEGESYDSHKAKVDPAKPASLTWKRRLNTKEVVLSTFGLTLKEIITLAPTGIRLWRHLRGEKSSEQVAFLNPFMKRDLSSCHGVPLGGIGAGSIGRSYKGEFRRWQLFPRICEDGPVLANQFSVFVSRPNGEKHSTVLCSGYPDSQNASPASGVGSWDWNLNGSSSTYHALFPRAWTVYDGEPDPNLKIVCRQISPVIPHNYKESSFPAAVFTFTLSNSGKMAADVTLLFSWANSVGGDSGLSGRHFNSIFRMEDGVRGVLLHHMTANGLPSVTFAVAAEETDEVRVSECPCFVVSGNSQGITAKDMWHEVKEHGSFDHLHFEEMSMPSEPGSLVGAAIAASVTIPADTVRTVTFSLAWACPEVNFSGGRTYHRRYTKFYGTFGNAASAIA…	---NA---	0	16.132	3	2	5	2	1	948	105.6	6.32	204	2	0	3.88	4.907	1.265	1.96	2.29	0.34	4.45368e-06	7.74687e-07	0.581351	0.00010273	1.02963e-05	1	107.7	418	528.6	20.58	23.96	21.7	84.3	93.5	129	124.2	364.3	321.6	479.6	543.7	446.1	421.4	640	626.4	84.3	82.9
High	CDO98200	pep chromosome:AUK_PRJEB4211_v1:4:3593828:3596681:1 gene:GSCOC_T00022219001 transcript:CDO98200	MSSSIHLSSINPISFRHSNRQVLSPLACHNVDVREPDSGSSKPPALRQNAQSAKETIEEEKRVLVGTYARAPVVFASGKGCKLYDVEGREYLDLSSGIAVNALGHGDPDWLRALTEQANTLTHVSNIYYSVPQVELAKRLVASSFADRVFFTNSGTEANEAAIKFARKFQRSLHPSEEQPPVEFIAFSNCFHGRTMGALALTSKEHYRIPFEPVMPGVSFLEYGDTQAATKLISSGKIAAVFVEPIQGEGGIYSATKEFLKALRTACDSAGALLVFDEVQCGLGRAGYLWAHEAYGIYPDMMTLAKPLAGGLPIGAVLTSERVAGSINFGDHGSTFAGNPLVCSAAIAVLDKISKPGFLASVSKKGKYFKELLVKKLGGNAHVKEVRGLGLIIGIELDV…	Acetylornithine aminotransferase, mitochondrial; Short=ACOAT; AltName: Full=Acetylornithine transaminase; Short=AOTA; Flags: Precursor	0	11.818	15	3	3	3	1	457	48.9	6.9	50	3	0	3.852	2.53	0.657	1.95	1.34	-0.61	0.00306393	0.0488894	0.583308	0.012401	0.104734	1	77.3	297.7	195.5	35.01	11.16	52.74	101.2	115.7	59	58.5	265.5	290.9	304.7	346	318.5	322.5	119.1	120	101.2	102.6
High	CDP02997	pep chromosome:AUK_PRJEB4211_v1:6:10818533:10826509:1 gene:GSCOC_T00041452001 transcript:CDP02997	MGGDKAISLEEIKNETVDLEKIPIEEVFEQLKCTREGLSSEEGANRLQIFGPNKLEEKKESKILKFLGFMWNPLSWVMEAAAIMAIALANGGGQDPDWQDFVGIVCLLVINSTISFIEENNAGNAAAALMAGLAPKTKVLRDGQWSEQEAAILVPGDIVSIKLGDIIPADARLLEGDPLKVDQSALTGESLPVTRNPGEEVFSGSTCKQGEIEAVVIATGVHTFFGKAAHLVDSTNQVGHFQKVLTAIGNFCICSIAVGMLIELIVMYPIQHRKYRDGIDNLLVLLIGGIPIAMPTVLSVTMAIGSHRLSQQGAITKRMTAIEEMAGMDVLCSDKTGTLTLNKLTVDKNLIEAFAKGVDKEHVLLLAARASRVENQDAIDAAIVGTLADPKEARAGIRE…	Plasma membrane ATPase 2; AltName: Full=Proton pump 2	0	110.498	27	19	44	10	1	954	104.8	6.76	951	19	0	3.845	3.177	0.826	1.94	1.67	-0.28	1.58641e-06	9.98298e-06	0.726429	5.18737e-05	8.4808e-05	1	1348.1	5182.7	4282.4	17.39	23.26	20.27	1555.4	1560.5	1133.2	1168.4	6451.8	6206.2	4328	4107	5148	5097	3598	3587.8	1555.4	1384.2
High	P21342	Pyrophosphate--fructose 6-phosphate 1-phosphotransferase subunit alpha OS=Solanum tuberosum OX=4113 GN=PFP-ALPHA PE=1 SV=2	MDADYGIPRELSDLQKLRSHYHPELPPCLQGTTVRVELRDATTAADPSGEHTIKRFFPHTYGQPLAHFLRATAKVPDAQIITEHPAIRVGVLFCGRQSPGGHNVIWGLHDALKVHNPKNILLGFLGGSEGLFAQKTLEITDDVLATYKNQGGYDMLGRTKDQIRTTEQVNAAMAACKALKLDGLVIIGGVTSNTDAAHLAEKFAETKCLTKVVGVPVTLNGDLKNQFVEANVGFDTICKVNSQLISNVCTDALSAEKYYYFIRLMGRKASHVALECTLQSHPNMVILGEEVAASKLTIFDITQQICDAVQARAEHDKNHGVILLPEGLIESIPEVYALLQEIHGLLRQGVSADKISSQLSPWASALFEFLPHFIRKQLLLHPESDDSAQLSQIETEKLI…	---NA---	0	17.24	7	3	6	2	1	616	67.3	7.43	234	3	1	3.841	2.371	0.617	1.94	1.25	-0.7	0.000706433	0.0254423	0.373671	0.00412008	0.0590719	0.976227	251	964	595.1	20.6	4.2	2.13	296.5	305.7	207.9	212.5	952.2	892.7	976	978.4	593.6	579.6	610.6	596.5	296.5	271.2
High	CDO98809	pep chromosome:AUK_PRJEB4211_v1:3:955511:956983:1 gene:GSCOC_T00025734001 transcript:CDO98809	MGVITYDHEVTSSVPPAKLFKAFILDFDNLIPKILPQAIKSVETLQGDGGAGTVKLTHFGEGSQYKSMKHRVDELDKENFAFKYTVFEGDVLGDVIEKISYEVKIEASADGGSITKSKSTYYTKDDAKITEEHIKSGKDKSAGVFKAIEAHLAANPDAY	---NA---	0	28.288	42	5	17	5	1	159	17.4	5.83	451	5	0	3.838	8.158	2.126	1.94	3.03	1.09	0.0636784	0.00264474	0.485712	0.160606	0.00816945	1	524.5	2012.8	4278.7	60.26	52.72	56.2	303	293.9	982.9	907.8	1256.5	1197.9	3224	3346.8	2546.7	2429.4	7188.7	7221	303	260.7
High	CDO97058	pep chromosome:AUK_PRJEB4211_v1:2:16199386:16203698:1 gene:GSCOC_T00014282001 transcript:CDO97058	MPLFNHNSPLFICAAAALCPLLFQFLHFACSESFIGVNYGQVADNLPPPAATAKLLQSTSIEKVRLYGADPAIIRALADTGIGIVIGAANGDIPALASDPNFAGQWVATNVLPYYPASKILVITVGNEVMTSTDQNLISQLLPAMQNVQNALNAASLGGKIKVSTVHSMAVLTQSDPPSSGTFNPGFGGTMKALLQFHQANGSPFMINPYPYFAYQSDPRAETLAFCLFQPNAGRVDSGTSIKYMNMFDAQVDAVHSALNALGFKDVEIVVAETGWPYKGDPTEVGPSLDNAKAFNGNLISHLRSLVGTPLMPGKSVDTYIFALFDEDLKPGPSSERSFGLFKPDLSVTYDVDLSKNSQTPATPATPAPVSPTTPITPITPVPKPAAGWCVPKPGVSDA…	Glucan endo-1,3-beta-D-glucosidase; AltName: Full=Major pollen allergen Ole e 9; AltName: Allergen=Ole e 9; Flags: Precursor	0	17.696	11	3	9	3	1	450	47.4	5.47	168	3	0	3.832	1.019	0.266	1.94	0.03	-1.91	0.0823473	1	0.0869785	0.198703	1	0.365047	474.3	1817.3	483.3	51.18	34.72	64.04	296.4	289.5	759.9	758.8	1358.7	1280.6	2430.9	2473.1	265.6	247.2	908.4	879.2	296.4	256.8
High	CDP00799	pep chromosome:AUK_PRJEB4211_v1:11:25731751:25733203:-1 gene:GSCOC_T00032887001 transcript:CDP00799	MGLKGKMIGQTNIHGPAGDVFHDVFSKRPHHLATMTPEKVQGFTLLGGDLGTVGSKICWHYTHDGKDRVAKQIIQDINEEKKSIVFKMIEGDLMELYKTFTIIYHVDVLGDKESLITWTLDYEKLKEDTPHPGTLLNFFLHMVEDIESHHIKNA	Kirola; AltName: Allergen=Act d 11	0	7.539	7	2	3	2	1	154	17.5	6.6	52	2	0	3.811	5.444	1.428	1.93	2.44	0.51	0.0349139	0.00730106	0.913584	0.0954104	0.0197235	1	77.7	296.3	423.2	21.44	46.06	70.18	67.8	64.3	89.1	100.3	201.4	196.2	435.9	482.3	203	217.2	824.3	889.6	67.8	57
High	CDO98178	pep chromosome:AUK_PRJEB4211_v1:4:3450817:3453594:-1 gene:GSCOC_T00022189001 transcript:CDO98178 description:Glycerol kinase [Source:Projected from Arabidopsis thaliana (AT1G80460) UniProtKB/Swiss-Prot;Acc:Q9M8L4]	MPGEEVFIGSIDQGTTSTRFIIYDRSAKPIASHQLEFTQFYPQAGWVEHDPNEILESVRVCISKAIDKATAEGHNVDGGLKAIGLTNQRETTVVWSKSTGRPLYNAVVWMDIRTSPICRKLEQELPGGRTHFVDTCGLPISTYFSALKLLWLLENVDAVKEAVKSGDALFGTIDTWLIWNLTGGVGNGLHVTDISNASRTMLMNLKTLDWDKPTLDALGIPSGILPKIISNSEIIGNITEGWPITGIPIAGCLGDQHAAMLGQACRKGEAKSTYGTGAFILLNTGEETIKSNHGLLSTLAYKLGPKAPTNYALEGSIAIAGAAVQWLRDSLGIISSASEIEELASKVDSTGGVYFVPAFNGLFAPWWRDDARGVCIGITRFTNKSHIARAVLESMCFQV…	Glycerol kinase; Short=Glycerokinase; AltName: Full=ATP:glycerol 3-phosphotransferase; AltName: Full=Protein GLYCEROL INSENSITIVE 1; AltName: Full=Protein NONHOST RESISTANCE TO P. S. PHASEOLICOLA 1	0	13.583	10	4	7	4	1	522	56.4	5.57	113	4	0	3.775	4.734	1.254	1.92	2.24	0.33	0.148578	0.0701669	0.990705	0.31849	0.14361	1	366.4	1383	1734.4	63.29	55.6	55.54	645.6	726.4	197	207.9	2327.2	2279.8	774.8	838.9	2911.7	2892.1	1040.2	994.3	645.6	644.3
High	CDP06462	pep chromosome:AUK_PRJEB4211_v1:6:933078:944621:1 gene:GSCOC_T00023324001 transcript:CDP06462 description:FAC1 [Source:Projected from Arabidopsis thaliana (AT2G38280) UniProtKB/TrEMBL;Acc:A0A178VY66]	MDTYALHLAMAALVGASAVAVSAYYMHRKTLNHLLEFAKTIERERERGDAHFKRYGSVDKRRNHGRRKGSGYYRRGSASLPDVTAISGGMDILDDRRNGPVHVDSIPIGLPRLHTLPEGKSSHASSAKRAGHLIRPTSPKSPVASASAFESVEGSDDEDNMTDSAGLNDPYLHANGNADLPDHRNANNGEQMAMSASSMIRSHSVSGDLHSVQPDPVAADILRKEPEQETFVKLKIAPRETPSPDEVDVYRNLQVCLEMRKTYVFREAVVPWEKEIITDPSTPKPIPNPFDYMQERKSDHSFQMEDGVVQVYANKEATEKLFPVADATTFFTDLHYILKVIAAGNIRTLCHHRLVLLEQKFNLHLMLNADREFLAQKSAPHRDFYNVRKVDTHVHHSAC…	AMP deaminase; Short=AtAMPD; AltName: Full=Protein EMBRYONIC FACTOR 1	0	27.734	15	8	14	7	1	841	96.2	7.08	211	8	1	3.77	5.829	1.546	1.91	2.54	0.63	8.15357e-05	2.88545e-06	0.264085	0.000806009	3.01155e-05	0.77871	463.3	1746.4	2700.3	38.86	18.28	13.66	332.1	311.9	650.2	646.2	1500.1	1477.2	2062.7	2033.1	2410.7	2379.1	3048.8	3024.7	332.1	276.7
High	CDP01682	pep chromosome:AUK_PRJEB4211_v1:7:9583737:9585664:-1 gene:GSCOC_T00036814001 transcript:CDP01682	MGKARTVGAGMDYSQTSKLALKWAADNLVEEGDSLIIIHGVSPKVETTNKQLFEDTGSPLIPLAEFREINVSKHYGLNPDPEVLDLLDMVAKTKGVKVVAKVYWGDAREKLCEAVDHLKLDSLVVGSRGLGAIKRVLLGSVSNYVVQNALCPVTVVKGPPK	---NA---	0	13.285	24	2	3	2	1	161	17.3	7.96	113	2	0	3.748	1.877	0.501	1.91	0.91	-1	0.141568	0.734389	0.70992	0.308828	0.994137	1	76.9	288.3	144.4	65.23	30.21	61.53	137	145.4	43.2	35.7	375.5	370.2	212.4	224.5	251.3	269.9	76.6	82.9	137	129
High	CDP21255	pep supercontig:AUK_PRJEB4211_v1:scaffold_2984:8847:9818:-1 gene:GSCOC_T00006245001 transcript:CDP21255	MAFFHSHLFFQLAIIVSLVHFAMAGRQVPKPTQDDQNTMVFQYHNGPLLSGKISINLIWYGKFNPSERAIIADFVTSLSTSSSNPTTNEPSVATWWKATEKYYHLLRSKKASPLILSLGTQVIDESCSLGKSLTRNQIEELAAKGEQKNAINVVLTASDVAVDGFCSSTCGTHGSLLSSKIASAKGKIYKFAYIWVGNSATQCPGQCAWPFYQPMYGPQAPPLVAPNNNVGLDGMVINVATLLAGTATNPFGNGYFQGPANAPLEAASACTGVYGRGAYPGYPGKLLVDPTTGASYNAHGTNGKKYLLPAFVDPSTSSCSTLV	---NA---	0	7.836	11	2	2	2	1	323	34.4	8.48	29	2	0	3.741	2.635	0.704	1.9	1.4	-0.51	0.000154519	0.00256999	0.514912	0.00128444	0.00796599	1	122.6	458.7	323.2	8.29	30.33	28.69	115.2	121.1	124.2	139.5	593.7	603.2	344.7	354.5	446.7	395.6	264	249.8	115.2	107.4
High	CDO98503	pep chromosome:AUK_PRJEB4211_v1:4:6191969:6195356:1 gene:GSCOC_T00022622001 transcript:CDO98503	MALAPTPLSKPFFSTKPTSQTPLFTLPATRKVHTRPNSVVRSSIATAPAAATVSKASAKVKSVKARQIIDSRGNPTVEVDLVTDGADGQLYRSAVPSGASTGIYEALELRDGDKSVYGGKGVLNAVKNINDILGPQLVGVDVRNQADVDAIMLEIDGTTNKSKLGANAILGVSLSVCRAGAGAKGIALYKHIQELSGTKELVMPVPAFNVINGGSHAGNNLAMQEFMILPVGATSFAEALRMGSEVYHTLKGIIKAKYGQDACNVGDEGGFAPNVQDNREGLVLLMDAIEKAGYTGKIKIGMDVAASEFLTKDGKYDLNFKKQPNDGAHVLTDQSLCELYKEFVKDFPIVSIEDPFDQDDWKSWASLQSSVDIQLVGDDLLVTNPKRIAEAIQKKACNA…	---NA---	0	66.187	30	12	28	9	1	490	52.2	6.67	517	12	2	3.688	5.492	1.489	1.88	2.46	0.57	0.000379026	2.12583e-05	0.474187	0.00260369	0.00015981	1	641.2	2364.9	3521.6	6.42	18.88	21.67	593	616	678.9	667.5	2005.2	2020.3	2828.2	2768.3	2925.2	2874.5	4239.5	4239.5	593	546.4
High	CDP15504	pep chromosome:AUK_PRJEB4211_v1:2:45665773:45670461:-1 gene:GSCOC_T00015359001 transcript:CDP15504	MFQKIVDALSGNNKKIKGTVVLMKKNVLDLNDFNASFLDGIHELLGQKVSLQLISAVNVDQGTLKGKLGKAAYLEDWITTNTFLAAGETAADITFDWDEDQGIPGAFIIKNNHPTQFYLKTLTLEEVPGHGRVHFVCNSWVYPAAKYKKDRVFFSNQAYLPSDTPEPLRQYRAEELVNLRGDGTGELKEWDRVYDYAYYNDLGDPDKGKEYARQNLGGSQEFPYPRRGRTGRPPSKTDPTVESRLPLLTSLDIYVPRDERFGHLKMSDFLGYGLKSVAQILYPALKSLFDSTPNEFDSLEDVLKLYEGGIKLPKGPLLQSITDNIPFELLKEILRTDGEAILKFPTPQIIQEDKSAWRTDEEFGREMLAGLNPVIISLLQEFPPKSKLDPKVYGSQDST…	---NA---	0	143.244	39	32	70	26	1	856	96.4	5.88	824	32	6	3.666	7.055	1.924	1.87	2.82	0.94	0.00467583	9.26049e-05	0.258838	0.0176079	0.000496393	0.767656	2249.7	8247.7	15871	23.08	31.93	42.59	2737.5	2762.8	1819.8	1848.9	11258.5	10791.5	6212.5	6303.6	23153.8	23431.8	10604.3	10879	2737.5	2450.6
High	CDP02196	pep chromosome:AUK_PRJEB4211_v1:7:2048950:2053164:-1 gene:GSCOC_T00039515001 transcript:CDP02196	MAKGPGLYTEIGKKVRDLLYKDFQSDHKFSITTCSPTGVAVTSSGTKKGDLFWADVNAQLKNKNITTDFKVDTNSNLFTAVTIDEPVPGLKTIFSFRVPDQRSGKLELQYLHDYAGISTSVGLTANPIINFSGVVGTNALALGTDVSFDTKTGTLTKCNAGLSFTNSDLIASLTLNDKGDALSASYYHTVSPLTSTAVGAEVTHSFSTNENTITLGTQHALDPLTTLKARVNNYGKASALIQHEWRPKSLFTITGEVDTKSIDQSAKFGLALVLKP	Mitochondrial outer membrane protein porin of 34 kDa; AltName: Full=POM 34; AltName: Full=Voltage-dependent anion-selective channel protein; Short=VDAC	0.005	2.067	3	1	3	1	1	276	29.6	7.97	47	1	0	3.662	3.565	0.974	1.87	1.83	-0.04	0.740418	0.737315	1	1	0.996593	1	57.3	209.7	204.2	99.3	100.93	100.68	187.5	227.8	17.5	16.1	763.9	808.9	48.8	57.6	800.9	766.3	53.3	54.4	187.5	202.1
High	CDP03031	pep chromosome:AUK_PRJEB4211_v1:6:10379231:10382084:-1 gene:GSCOC_T00041501001 transcript:CDP03031	MRLNSRFGTSSLIHVSLVLLLCFKASGGSAERSSAFFIFGDSTVDPGNNNYIKTTPENQANYKPYGQNGFFKEPTGRFSDGRIIVDYIAEYAKLPIIPPYLQPSADYSHGVNFASGGAGILSTTNPGVVIDLKTQLEYFHKVQRSLAEKLGTAEAEEIISNAVYFISMGSNDYMGGYLGNPEMQQLHPPEDYVRMVIGNLTQGIQELYDRGARKFGFLSLCPLGCLPALRVLNPKGHDAGCFEQASALALAHSNALQAVLPNLELLLPKGFKYCNSNFYDWLLDRINDPTKYGFKEGESACCGAGPYRGIFTCGGTKKDPNYELCDNPSDYVWFDSFHPTERIHEQFAKALWDGLSPSVGPYNLEGLFFNKQTIADVVDNPETQQIF	---NA---	0	13.123	10	2	7	2	1	387	42.7	5.54	139	2	0	3.662	3.288	0.898	1.87	1.72	-0.16	0.0722438	0.103167	0.999605	0.178709	0.19901	1	60.3	221	198.4	69.77	27.9	30.09	118.5	116.5	26.8	31.3	274.5	285.7	165.4	177.8	272	248.7	158.3	149.5	118.5	103.3
High	CDP04050	pep chromosome:AUK_PRJEB4211_v1:1:33217631:33223508:-1 gene:GSCOC_T00016584001 transcript:CDP04050	MSEGQRFQLGTIGALSLSVVSSVSIVICNKALISTLGFTFATTLTSWHLLVTFCSLHVALWLKLFEHKPFDPRAVMGFGILNGSSIGLLNLSLGFNSVGFYQMTKLAIIPCTVLLETLFFRKKFSRHIQVSLGILLLGVGIATVTDLQLNLVGSVLSLLAVVTTCIAQIMTNTIQKKFKVSSTQLLYQSCPYQAITLFVTGPFVDGLLTNQNVFAFKYTPQVLAFIVLSCLISVSVNFSTFLVIGKTSPVTYQVLGHLKTCLVLAFGYVLLRDPFSWRNILGILIAVVGMVVYSYYCTTESQQKASEAAAQLAQAKESESDPLISVENGASILTDGAAKAPGWNSNKDLQA	---NA---	0.001	2.926	7	1	2	1	1	351	38	8.72	29	1	0	3.64	2.261	0.621	1.86	1.18	-0.69	0.0153765	0.151892	0.72753	0.0478501	0.276557	1	40.5	147.5	91.6	43.38	17.56	15.39	20.9	31.7	51.8	59.4	175.1	164.5	120.3	132.2	78.5	89	113	94.2	20.9	28.1
High	CDP15410	pep chromosome:AUK_PRJEB4211_v1:6:4592102:4597041:-1 gene:GSCOC_T00043136001 transcript:CDP15410	MSLVDESFELKELQVLEGHADRVWSVAWKPATGFDGVPAVLASCSGDKTVRVWEQSPSSGSFQCKAVLEETHTRTVRSCAWSPSGKLLATASFDATTAVWEHVGDDYECVSTLEGHENEVKSISWNASGSLLATCGRDKSVWIWEVLPGNEFECVSVLQGHTQDVKMVQWHPNMDILFSCSYDNTIKVWAEDGDDDWHCVQTLAEANNGHTSTVWALSFNATGDKMATCSDDLTLKIWGSDLLTIQSGNGSAPWKHICTLSGYHDRTIFSVHWSREGIIASGAADDAIRLFAEDGDGLVDEPKYHLLLKKDKAHDMDVNSVQWSSAGNRLLASASDDGTIKIWELISLAGDQKPPL	---NA---	0	27.747	19	4	9	4	1	356	39	4.91	143	4	0	3.618	2.017	0.557	1.86	1.01	-0.84	0.0315659	0.4038	0.564646	0.0881419	0.637228	1	225.6	816	454.9	31.88	43.57	48.3	294.1	296.2	162.2	173	1237.8	1194.2	543.1	557.6	710.5	698.2	296.4	281.7	294.1	262.7
High	CDP00701	pep chromosome:AUK_PRJEB4211_v1:11:26747568:26751414:-1 gene:GSCOC_T00032750001 transcript:CDP00701	MAACTTFVKLNASSSSWIGQQSFNQRACAFPSRSRVSVVRASSSGSYTDELVKTAKSIASPGRGILAIDESNATCGKRLASIGLDNTEVNRQAYRQLLLTTPGLGDYISGAILFEETLYQSTTDGKKFVDCLRDECIVPGIKVDKGLSPLPGSNNESWCQGLDGLASRSAEYYKQGARFAKWRTVVSIPCGPSALAVKEAAWGLARYAAISQDNGLVPIVEPEILLDGDHPIERTLEVAEQVWAEVFYYLAENNVVFEGILLKPSMVTSGAEHKEKASPETIAKYTLTMLRRRVPPAVPGIMFLSGGQSEVEATLNLNAMNQSPNPWHVSFSYARALQNSVLKTWQGRPENAEAAQMALLVRAKANSLAQLGKYSAEGESEEAKKGMFVKGYTY	Fructose-bisphosphate aldolase 3, chloroplastic; Short=AtFBA3; AltName: Full=Protein PIGMENT DEFECTIVE 345; Flags: Precursor	0	122.337	43	14	49	13	1	394	42.7	7.62	1428	14	0	3.61	4.097	1.135	1.85	2.03	0.18	0.000135396	4.32107e-05	0.960108	0.0011646	0.000265372	1	927.6	3348.2	3799.9	35.62	13.04	10.12	678.3	676.2	1293.6	1268.4	3036.9	2870.1	3698.1	3691.3	3501.3	3431.7	4124.1	4136.5	678.3	599.8
High	CDP11250	pep chromosome:AUK_PRJEB4211_v1:9:6622499:6626325:-1 gene:GSCOC_T00033373001 transcript:CDP11250 description:Glycine cleavage system H protein 2, mitochondrial [Source:Projected from Arabidopsis thaliana (AT2G35120) UniProtKB/Swiss-Prot;Acc:O82179]	MATKLWASKAASYLRISVFHRGFATVVKDLKYADSHEWVKVDGNSATVGITDHAQDHLGDVVYVELPEVGKEVKQGDSFGAVESVKATSDVYSPVSGKVVDVNEKLGDSPGLVNGSPYEDGWIMKVEISNKDELNSLLDSEQYTKHCEAEDQKH	Glycine cleavage system H protein 2, mitochondrial; Flags: Precursor	0	47.214	48	4	14	4	1	154	16.9	5.11	265	4	0	3.598	4.612	1.282	1.85	2.21	0.36	0.000643248	0.000100506	0.834752	0.00382024	0.000532665	1	561.2	2019.4	2588.4	11.45	7.12	8.44	615.4	625.1	505.4	511.8	2181.8	2082.7	1852.4	1958	2742.4	2800.2	2357.4	2443	615.4	554.5
High	Q9M2A0	ATPase 8, plasma membrane-type OS=Arabidopsis thaliana OX=3702 GN=AHA8 PE=3 SV=1	MATEFSWDEIKKENVDLERIPVEEVFEQLKCSKEGLSSDEGAKRLEIFGANKLEEKSENKFLKFLGFMWNPLSWVMESAAIMAIVLANGGGKAPDWQDFIGIMVLLIINSTISFIEENNAGNAAAALMANLAPKTKVLRDGKWGEQEASILVPGDLISIKLGDIVPADARLLEGDPLKIDQSALTGESLPTTKHPGDEVFSGSTCKQGEIEAVVIATGVHTFFGKAAHLVDSTNNVGHFQKVLTSIGNFCICSIGLGMLIEILIMYPIQHRTYRDGIDNLLVLLIGGIPIAMPTVLSVTMAIGSHRLSQQGAITKRMTAIEEMAGMDVLCSDKTGTLTLNKLSVDKSLIEVFPKNMDSDSVVLMAARASRIENQDAIDASIVGMLGDPKEARAGITEVH…	ATPase 6, plasma membrane-type; AltName: Full=Proton pump 6	0	38.208	11	6	11	1	1	948	104.1	5.77	329	6	0	3.562	2.515	0.706	1.83	1.33	-0.5	0.594603	0.817427	0.993753	0.951638	1	1	89.3	318.1	224.6	78.69	91.47	90.65	40.6	35.1	202.4	196.4	112.3	101.7	901.3	939.3	79.6	73.6	633.8	638.8	40.6	31.1
High	CDP10299	pep chromosome:AUK_PRJEB4211_v1:3:12344163:12349223:1 gene:GSCOC_T00030979001 transcript:CDP10299	MAARVKVPRIKLGSQGLEVSAQGLGCMGMSAFYGPPKPEPDMIKLIHYAISRGITHLDTSDAYGPHTNEILIGKALKEGKRETVQLATKFAFTYEGGQFGIRGDPDYVRAACEGSLKRLGLDCIDLYYQHRIDTNVPIEATVGELKKLVEEGKIKYIGLSEASASTIRRAHAVHPITAVQLEWSLWTRDVEEEIIPTCRELGIGIVAYSPLGRGFFSSGPKLVENLTDDDYRKYMPRFQAENLEHNKNLYERVNAIASRKGCTPSQLALAWVHHQGNDVCPIPGTTKIENLDQNIGALCVKLSAEEMAELESIASSIKGERYASDAGTWKTSETPPLSTWKCT	---NA---	0	126.73	68	22	86	7	1	343	37.8	6.79	1242	22	1	3.538	2.914	0.824	1.82	1.54	-0.28	0.000189452	0.00106969	0.87408	0.0014884	0.00377742	1	1565.3	5537.4	4561.9	10.46	19.43	21.12	1635	1831.3	1459.4	1498.6	4711.9	4633.9	6615.1	6507.6	3808.3	3767.8	5502.6	5464.7	1635	1624.4
High	CDP07527	pep chromosome:AUK_PRJEB4211_v1:10:2235798:2238793:1 gene:GSCOC_T00024812001 transcript:CDP07527	MESNGKGVSIDGVPLPYETGEIDFGEPGTNGQHSFYQLIHQGRVIPCDFIGIVKSQQPVYLEGEVVSNHDELMSNFFAQPDALAYGKTAEQLLKENVPQHLVPHKTFCGNRPSISLLLPSLSAYNIGQLLAIYEHRIAVEGFVWGINSFDQWGVELGKSLASQVRKQLHVSRRKGEPIEGFNFSTTTVLSRYLQASADVPSDPSTLLPKM	Glucose-6-phosphate isomerase, cytosolic 1; Short=GPI; AltName: Full=Phosphoglucose isomerase; Short=PGI; AltName: Full=Phosphohexose isomerase; Short=PHI	0	35.539	40	4	14	3	1	210	23.2	5.96	269	4	0	3.513	3.726	1.061	1.81	1.9	0.09	0.267813	0.229966	0.999974	0.513673	0.395217	1	177.1	622	659.7	74.63	64.12	63.79	83.8	80.3	388.5	374.2	328	336.1	1170.7	1151.1	350.8	357.2	1236.5	1218.6	83.8	71.2
High	CDP01089	pep chromosome:AUK_PRJEB4211_v1:10:5695834:5697697:-1 gene:GSCOC_T00034602001 transcript:CDP01089	MASFASSLRILKLFVLISLFSSCFGSRIIGRTLGQDNQFQLLHYHKGALLGGRISVNLIWYGKFKPSQRAIIADFITSLSSSSAPPQTQPSVASWWKTTEKYYHLANSKKPSSLSLYLGKQILDENYSLGKSLTRKQIVELASKGEQRNAINVVLTAADVIVDGFCQNTCGSHGSSKGAAIQGKTYKFAYIWVGNSETQCPGYCAWPFHQPTYGPQNPPLVAPNNDVGMDGMVINLGSLMAGTATNPFGNGYFQGPAEAPLEAASACPGVYAKGAYPGYPGNLLVDRTTGASYNAHGTNGRKYVLPALYDPSTTSCSTLV	Protein PHOSPHATE-INDUCED 1; Flags: Precursor	0	15.016	17	4	6	3	1	320	34.3	9.07	128	4	0	3.512	3.454	0.983	1.81	1.79	-0.02	0.236864	0.248794	1	0.465691	0.423151	1	246.7	866.4	851.9	73.78	60.72	66.74	560.4	506.8	117.1	120.1	1595.2	1523.8	492.6	478.1	1618.2	1683.1	435.6	448.5	560.4	449.5
High	CDP15849	pep chromosome:AUK_PRJEB4211_v1:2:44840904:44845320:1 gene:GSCOC_T00016736001 transcript:CDP15849	MASTRVDSVLHNLELLHNNLEKRDSFETGFSNLREDFEALKLNLLFLKPVLLCARNWSSDQLKVRLRAFLSKIEAPVNRSGMDIKSLNLRSKSSFNLKSVVTALKPVVSNLLGNIKSFKQDIIDIYETLSSCSSSESGSCLRDYELVDFIDSVLQNLIDLLSRRYFESMEDYNSALHAHIEALEDKLTFLKNFIGFAKFLGVEERELGDLLAHVQVVALNAARLSYKCLFYKEDEEMHDPRMCSIISELLEKINPVDLQVYETYVKVLKAPKSPESLLTTQTDMQILKNFNDSLISSLWELLWCRTSFAVSVKDQMKRLYEGLRFLRSILNEAQENMNELNDKIVAVISEAGIVIFSLFLNGVKEVEVDSLVVGESADCCAMLVTTNNSVKLIVDVSGS…	---NA---	0	19.317	5	4	8	4	1	1155	131.2	5.53	84	4	0	3.491	2.789	0.799	1.8	1.48	-0.32	0.00168653	0.00812773	0.909176	0.00778044	0.0216366	1	268.1	935.8	747.7	38.07	37.59	33.68	188.7	193.3	371.7	385.4	678.1	652.9	1322.6	1291.3	545.3	572.7	976.2	1052.4	188.7	171.5
High	CDP05479	pep chromosome:AUK_PRJEB4211_v1:11:21317749:21324366:-1 gene:GSCOC_T00020546001 transcript:CDP05479	MENNDQNTSVKASGNQELPHKGRKEEEVADKVPYYKLFSFADRADYVLVLVGTVAAVGSGICLPLMQVILGEMINSFGETLDRKQVVHEVSKVSSKYVYLALGSGVASFLQVACWNVTGERQAARIRSLYLRSLLMQDIAFFDKEISTGEIIERISVDTITIQDAIGEKVGKFIQVSASVSGGFIIAFIKGWLLSLVLLSSIPPLILASSAMTIQLAKRASQGQAAYSVAATVVEQTLSSIRTIAAFTREKKAIVEYGNSLNTAYKSGVQEGLAAGLGFGLFTFFSYCTYALAIWFGAKMISEKDYSGGDVLNVTLAVLSGSFSVGHASPCLSAFASGQAAGFKIFQIMKRKPGEVLIDGVNIKEFQLKWIRSKIGLVSQEPVLFASSIGDNIAYGKDS…	ABC transporter B family member 4; Short=ABC transporter ABCB.4; Short=AtABCB4; AltName: Full=Multidrug resistance protein 4; AltName: Full=P-glycoprotein 4	0	8.459	1	1	2	1	1	1204	129.8	8.44	126	1	0	3.488	1.656	0.475	1.8	0.73	-1.07	0.00735536	0.363514	0.199645	0.0260757	0.583457	0.657813	50.9	177.7	84.4	39.99	38.14	23.55	29.2	39.8	65.2	73.1	127.3	124.3	247.9	251.7	70.8	72.1	98.8	113.5	29.2	35.3
High	CDP01541	pep chromosome:AUK_PRJEB4211_v1:7:10980691:10989581:-1 gene:GSCOC_T00036627001 transcript:CDP01541 description:ATP-dependent 6-phosphofructokinase 5, chloroplastic [Source:Projected from Arabidopsis thaliana (AT2G22480) UniProtKB/Swiss-Prot;Acc:Q8VYN6]	MDSLSPVIGQRLTLPARASATPRLCDRSFLFRSIIIGGASRKFPRIRVKAVTNKLGSYSSSIDFSDPDWKSKYQKDFEARFNIPHLTDVFPNAVSYPSTFCLKMRTPVTEEFAGGYPSDEAWHGYINNNDRVLLKVIHFSSPTSAGAECIDPGCTWVEQWVHRAGPREKIYFKPEDVKAAIVTCGGLCPGLNDVIRQVVITLEIYGVKKIVGIPFGYRGFSDQDLAEMPLSRKVVQNVHLSGGSLLGVSRGGPTVSEIVDRMEDRGINMLFVLGGNGTHAGANAIHDECRRRKMKVAVVGVPKTIDNDIMLMDKTFGFDTAVEEAQRAINSAYIEAHSAYRGIGVVKLMGRSSGFIAMQASLASGQIDICLIPEVPFNLHGPHGVLTHLKYLLATKGSA…	ATP-dependent 6-phosphofructokinase 5, chloroplastic; Short=ATP-PFK 5; Short=Phosphofructokinase 5; AltName: Full=Phosphohexokinase 5; Flags: Precursor	0	11.786	6	3	3	3	1	534	58.3	8.27	66	3	0	3.485	2.785	0.799	1.8	1.48	-0.32	0.00175345	0.00904972	0.89633	0.00804341	0.0238337	1	99.9	348.1	278.2	33.71	38.37	3.04	67.4	80	139.7	124.7	471.9	516.4	241.9	256.8	276.1	269.7	289.9	280.3	67.4	71
High	CDP06146	pep chromosome:AUK_PRJEB4211_v1:5:24213262:24219064:1 gene:GSCOC_T00021539001 transcript:CDP06146	MRASASTIYFISLLLSLLLSPTFAIKKSYVVYLGAHSHRPEVSSIDYDRVTDSHYSFLGSFLGSKEKAQEAIFYSYTRHINGFAAILDDAEAAEISKHPEVISVFLNKGKKLHTTRSWEFLGLEHDGKIHPSSLWKRARFGEGTIIGNLDTGVWPESKSFSDDGYGPIPVKWKGTCQNGEDETFHCNRKLIGARYFNKGYASAVGKLNSTFNSPRDGEGHGSHTLSTAGGNFVVGANVFGYGNGTAKGGSPRARVAAYKVCWPPVSNNECFDADILAGIDMAIHDGVDVISVSLGGDPVPYFNDSIAIGSFHAVKHGIVVICSAGNSGPTPASVSNVAPWQITVAASTMDRHFPSYVVLGNNMRFSGESLSQEALPDKKFFPIVAAKSVKAAYASDKDA…	Subtilisin-like protease SBT5.3; AltName: Full=Auxin-induced in root cultures protein 3; AltName: Full=Subtilase subfamily 5 member 3; Short=AtSBT5.3; AltName: Full=Subtilisin-like protease AIR3; Flags: Precursor	0	16.509	6	4	7	4	1	769	82.6	8.85	145	4	0	3.483	1.554	0.446	1.8	0.64	-1.16	0.00106626	0.393465	0.0359161	0.00536105	0.622712	0.192313	328.1	1142.6	509.8	35.57	24.16	20	233.5	241	446.5	450.3	955.7	901.1	1458.4	1365.9	424.9	435.8	622.4	596.3	233.5	213.8
High	CDP18382	pep chromosome:AUK_PRJEB4211_v1:2:43245241:43250762:1 gene:GSCOC_T00012962001 transcript:CDP18382	MVKAVAVLSGNECVSGTIFLTQEGDGPTTVTGTITGLKPGLHGFHVHALGDTTNGCMSTGPHFNPKGKEHGAPCDENRHAGDLGNVTAGQDGTANVLVVDNQIPLTGPHSVVGRAVVVHADPDDLGRGGHELSKTTGNAGGRVACGVIGLQG	Superoxide dismutase [Cu-Zn] 2	0	15.954	39	3	8	3	1	152	15.2	6.42	246	3	0	3.477	3.433	0.987	1.8	1.78	-0.02	0.000807018	0.000958707	0.999982	0.00459925	0.00346618	1	429.3	1492.7	1473.7	4.14	25.04	20.4	416.6	417.5	452.5	441.4	1211.7	1205.8	1912.2	1839	1240.8	1223.5	1771	1750.2	416.6	370.3
High	CDP20001	pep supercontig:AUK_PRJEB4211_v1:scaffold_823:4337:5731:-1 gene:GSCOC_T00009997001 transcript:CDP20001	MNIKHQHFLITALPAQGHINPTLQLAKNLARAGAQVTFATTVYGLRCIKNPPASIGLSFASFSDGYDDEEPMKNRNPGRYLSDVKCYGSKDLTKLIQCSSNEGRPVTFLIYTVLLPWVAEVASEMNIHSALLAIQCATSFAIYHRYFNSHDGIYDGVREVDCSSISIKLPDLPLLQKEDLPTFLLPNDPLFASIVPFVHENIKILEQDSEACVLVNTFNELEEASIKAVHGMNLIPIGPLIPSAFCDGYDSSDKSVGGNLFDIPENDCLQWLDSKPERSVVYASFGSLLSLKKEEKMEILHGLKEAGRSYLLVLRADNEQEEEVKAVVENISSEEGMIVPWCSQMEVLCHRSIGCFLTHSGWNSTLESIVAGVPIVGCPHLSDQTTNAKLIEEVWGIGV…	UDP-glycosyltransferase 75D1	0	19.706	15	4	6	2	1	464	51.4	5.2	152	4	0	3.446	3.547	1.029	1.78	1.83	0.04	0.302568	0.3038	1	0.570673	0.500731	1	26.5	91.3	94	27.55	82.99	92.64	34.6	30.7	18.4	22.9	39.1	34.4	213.3	232	32.5	27.4	272.7	272.5	34.6	27.2
High	CDP03557	pep chromosome:AUK_PRJEB4211_v1:1:36859568:36863547:1 gene:GSCOC_T00015962001 transcript:CDP03557	MPHGQTALLSLPKKLSQSVVSNIYIFSEQQLSAIPESYSVQPPPPPPPTPRKKAQGKNLKQSLLSLASLEENNMFSIRSSSSSISRALLARSFIMREFCAAQRRESKLEGKVALITGAARGIGKETAAKFITNGAKVVIADIRRDVGQETARQLGANASFVACDVSQESDISNAVDYAVSTHGQLDIMYNNAGIACRTPPSVVDLDLAAFDKVVSINVRGAVAGIKHASRVMIPRQAGCILCTASVTGMMGGLAQHTYSITKSSVIGMVKSVAAELCRHGIRVNCISPFAIPTAFALEEMQDYFPGLDAGALAGMIHNAGVLRGANCEPSDVANAALYLASDDAKYISGHNLVVDGGFTSIKSLNFAGT	---NA---	0	8.966	14	3	5	3	1	369	38.9	8.57	68	3	0	3.431	3.371	0.983	1.78	1.75	-0.03	0.64512	0.647446	1	0.997857	0.908747	1	85.8	294.3	289.2	83.06	98.46	100.67	210.7	208	33	35.4	1053.4	1009.1	85.8	78.7	1095.8	1120.5	75.6	76.3	210.7	184.5
High	CDP13717	pep chromosome:AUK_PRJEB4211_v1:5:28020773:28022008:1 gene:GSCOC_T00038756001 transcript:CDP13717 description:Fasciclin-like arabinogalactan protein 1 [Source:Projected from Arabidopsis thaliana (AT5G55730) UniProtKB/Swiss-Prot;Acc:Q9FM65]	MQLTPAAMVAAAAVVFSLALILLPSPTEAHNITKILAEFPEFSTFNHFLTTTHLANDINNRETITVCAVDNAGMADLLGKHLSIFALKNVLSLHVLLDYFGAKKLHDITNGTALAATMYQATGSAPGSSGFVNITDLKGGKVGFGAVDNGGIDATFVKSVKEIPYNISVIQISKILPSPDAEAPTPGPSQMNITGIMSAHGCKVFAETLLASPAEQTFDSSVDGGLTIFCPGDAAMKSFLPKFKNLTADGKQSLLEFHGVPIYEPESSLKSNNGPINTLATDGAKKFGLVVQNDGQQVTLKTPLVTARITSTIFDEQPLAIFELDKVLLPRELFKGSLAPTPAPAPAPGPVADAPEPSKKHKSPPAPPAAGSPADGPAADQTAADVNGAVRFDGGRFAA…	Fasciclin-like arabinogalactan protein 1; Flags: Precursor	0	33.508	16	4	7	4	1	411	42.9	5.95	122	4	0	3.43	0.295	0.086	1.78	-1.76	-3.54	0.0684646	0.0288129	0.000146825	0.170793	0.0658133	0.00347544	331.2	1135.9	97.6	34.17	70.4	38.5	251.8	249.9	480.9	435.6	571.8	532	2256.4	2293.3	91.7	103.8	42.7	125.4	251.8	221.7
High	CDP05012	pep chromosome:AUK_PRJEB4211_v1:2:868827:871298:-1 gene:GSCOC_T00019914001 transcript:CDP05012 description:CB5-E [Source:Projected from Arabidopsis thaliana (AT5G53560) UniProtKB/TrEMBL;Acc:A0A178USU5]	MASDQKVHTFDEVVQHNKTKDCWLIINGKVYDVTPFMEEHPGGDEVLLSATGKDATNDFEDVGHSDSARDMMDQYYIGEIDKATVPLKRMYIPPQQAQYNPDKTPEFVIKILQFLVPLLIMGLAFAVRHYTKEK	Cytochrome b5 isoform E; Short=AtCb5-E; AltName: Full=Cytochrome b5 isoform 1; AltName: Full=Cytochrome b5 isoform A; Short=AtCb5-A	0	49.365	62	8	18	8	1	134	15.3	5.31	418	8	0	3.426	4.606	1.344	1.78	2.2	0.43	0.00106952	0.000122757	0.754937	0.00537189	0.000635235	1	561.8	1924.8	2587.4	36.18	34	30.97	378	417.8	755.3	763.4	1426.7	1408.9	2596.7	2606	1979.2	1933.6	3382.3	3397.5	378	370.6
High	CDP00179	pep chromosome:AUK_PRJEB4211_v1:11:31167243:31171142:1 gene:GSCOC_T00032044001 transcript:CDP00179	MAAKRVSSSLLLSRSFTSSLASRLTGGKSACQARAISRYSTAAALEEPIKPPVNVEYTKLLINGQFVDAASGKTFPTLDPRTGEVIAHVAEGDAEDVNRAVAAARKAFDEGPWPKLTAYDRQRILLRFADLVEKHNDEIAALETWDNGKPYEQAAKIEVPMFVRLMRYYAGWADKIHGMTVPADGPYHVQTLHEPIGVAGQIIPWNFPLLMYAWKVGPALACGNTVVLKTAEQTPLSALYVTKLLHEAGLPSGVLNVVSGFGPTAGAALCSHMDVDKLAFTGSTETGKIILELSARSNLKPVTLELGGKSPFIVCEDADVDNAVELAHFALFFNQGQCCCAGSRTYVHERVYDEFVEKATARALKRSVGDPFRQEIEQGPQVDSEQFEKILRYIRAGVD…	Benzaldehyde dehydrogenase, mitochondrial; AltName: Full=2-phenylacetaldehyde dehydrogenase; AltName: Full=Acetaldehyde dehydrogenase; Flags: Precursor	0	155.726	50	20	77	17	1	538	58.8	6.8	1266	20	3	3.423	5.348	1.562	1.78	2.42	0.64	0.00621575	0.000322707	0.53782	0.0225032	0.00142545	1	2335.3	7994.3	12489.3	24.86	10.65	7.78	1868.9	1881.8	2910.3	2898.2	7402.7	7020.3	8633.1	8663.7	11708.6	11627.9	13384.6	13322.1	1868.9	1669.2
High	CDP14135	pep chromosome:AUK_PRJEB4211_v1:6:17984292:17986107:-1 gene:GSCOC_T00040371001 transcript:CDP14135	MPYVIQDVRLIPNAESYCFPSSSAFTIYSFFGEPEWKPELSQPELLEPLEDLPTWESCFPQELTDFVKFQNDFKPISSGYLFNTCRAIEGPYLDLHVKSKITDSDKQWAIGPFNPVEMNGQKNSEKRHYCLNWLDKQAPDSVIFISFGSTTSVSDEEAKEIATGLDKSGQNFIWVLRDADKGDVFQGEDRRVQLPEGFEERIEGRGIVVRDWAPQLEILGHSSTGGFMSHCGWNSCIESISMGVPVAAWPMHSDQPRNAILLEKVLKIGLIIRDWSKQNELVTSITVENAVRRLMDSAEGEEMRQRARELSKAVKGSVIEGGVSRSEMDSFISHIRR	Zeatin O-glucosyltransferase; AltName: Full=Trans-zeatin O-beta-D-glucosyltransferase	0	7.385	7	2	5	2	1	337	38.1	5.06	32	2	0	3.416	3.886	1.138	1.77	1.96	0.19	1.63967e-06	4.33344e-07	0.81487	5.18737e-05	6.23952e-06	1	281	959.9	1092.1	20.18	11.13	8.73	347.4	329.5	237.3	239.7	1049.7	1056.1	858.8	877.8	1156.9	1207.8	1030.9	1009.8	347.4	292.3
High	CDP10240	pep chromosome:AUK_PRJEB4211_v1:6:12790384:12792347:1 gene:GSCOC_T00030903001 transcript:CDP10240	MASKVISLQTIDMSPYLREGDEKGRKKVVEEIWKASTECGFFQAVNHGIPVELLKKTRRIYREFFDRPDEEKFKCVPQVGERPSPGYFKSQQFGTKEGHEDFLTVAPGRLNVYPKDFPEFKQVLEEIFPYLVKLAAAIEEIINSASGLPPNFLKEYNDDRNSDFLLGLHYPAAENLSNIGRYPHEDVNLITFVYQDHVGGLQVLNNGQWIPVIPDDEKLVVNIGDILQVLSNNRLKSATHRVYRTEGTERDSFAFFYSLKPDKWVEPLPQFTTEVGEPPKYRGFLYDDYMQLRRRDYTDNQPDKYEDIARITYYAINT	Probable 2-oxoacid dependent dioxygenase	0	27.234	25	7	18	7	1	318	36.9	5.5	314	7	0	3.396	5.924	1.744	1.76	2.57	0.8	0.140784	0.0155369	0.755434	0.308368	0.0384351	1	809.3	2748.5	4794.1	5.39	7.86	6.67	827.4	875.4	791.6	776.1	2620.5	2459.2	2899.6	2882.7	4459.6	4602.8	4993.4	5139.2	827.4	776.5
High	CDP01938	pep chromosome:AUK_PRJEB4211_v1:7:7567835:7571569:1 gene:GSCOC_T00037124001 transcript:CDP01938	MDSLVQALDTETMLLLLIFPLAFLFLLSRFRSKPHPPGPRGLPLIGNMMMVNQLSHRGLAKLAHQYGGLCRLKMGFLNMVAVSSPEAARQVLQVQDNIFSNRPATIAISYLTYDRADMAFAHYGPFWRQMRKLCVMKLFSRRRAESWDSVRDEVDDMIKYAASNTGSAINLGELVFGLTRNIIYRAAFGSSCSEGQDEFIQILQEFSRLFGAFNLADFIPWLYWLDLQGLNKRLLKARASLDGFIDSIIDDHIEAKNKRNGLAVEGDSDMVDELLAFYSEEAKVSESEDLQNSIKLTRDHIKAIIMDVMFGGTETVASAIEWAMAELMKSPEDLKKVQQELKDVVGLHRKVEESDLDKLTYFKCCQKEVLRLHPPIPLLLHETAENAEVAGYQIPAKSR…	Cytochrome P450 84A4	0	21.54	12	4	7	4	1	513	57.9	6.24	194	4	0	3.388	3.058	0.903	1.76	1.61	-0.15	0.000801351	0.00177255	0.991091	0.0045723	0.0057817	1	95.9	325	293.4	14.43	19.2	18.62	105.9	109	86.9	81.1	392.8	373.1	283.1	267	351.3	337.7	254.9	244.1	105.9	96.7
High	CDP00580	pep chromosome:AUK_PRJEB4211_v1:11:27952352:27953758:-1 gene:GSCOC_T00032564001 transcript:CDP00580	MASTSSLRPVSSLKLFNLESLSNIEFHYDKLAFKLSNPLLTKSVQISTTHQAFSARRPSKDASTKAFFFNIGKPKPEPTKVQELYVYEINERDRGSPAYLRLSKKDANSLGDLVPFSNKLYTGDLQKRLGITSGLCVLIKHVPEKKGDRYEAIYSFYFGDYGHISVQGPYLTYEDTHLAVTAGSGVFEGVQGVVKLQQIVFPFKLFYTFYLKGIKDLPAELVVKPVLPTATAEPSAAAKATEPQATIPNFTD	---NA---	0	16.442	15	3	7	3	1	252	28	9.14	236	3	0	3.338	3.151	0.944	1.74	1.66	-0.08	2.45491e-06	4.02e-06	0.996871	6.54726e-05	3.891e-05	1	305.1	1018.2	961.4	7.3	23.94	22.57	313.9	326.7	296.5	275.7	1247	1227.9	844.3	784.5	1138.3	1194	763.7	812	313.9	289.8
High	CDP13870	pep chromosome:AUK_PRJEB4211_v1:2:3996888:4001043:1 gene:GSCOC_T00038999001 transcript:CDP13870	MKSLLFSFLLLLSVLVSLKNLSSWVLLGMLLIGLASYFLNVLWLKPKRLLWKLQRQGIRGPCPSFLYGNVQEMQKIQAKAMKAANFGEFVAHDYTSTLFPYFEQWRKEYGPIYTYSTGNKRHLYVNHPELVKEMNLSTSLDLGKPSYVTKRLAPMLGTGILRSNGHAWAQQRKIVAPEFFSDKVKGMVGLMLQSAEPLMAKWEASIEAQGGTTAEIRVEGDLRGVSADVISRACFGSSYFEGKMIFSKLRTLQKVIANQSVLFGIPTLGFFPSKQQKEIQSLEKEIESLIWETIAQRGEECSQEFPSEKDLLQLILEGAINDVGKNSSKKFIVDNCKNIYFAGHESTAVAISWCLMLLALHPEWQDRIRDEIAQVCPDGSIDADSLPKMKMVKMVIHEV…	Cytochrome P450 714A1; AltName: Full=EUI-like P450 A1	0	7.135	7	2	3	2	1	538	60.6	8.95	24	2	0	3.318	5.578	1.681	1.73	2.48	0.75	0.281611	0.0794496	0.932794	0.536333	0.160117	1	37.9	125.8	211.5	87.92	77.48	65.48	15.4	10.3	93.3	95.3	57.5	55.4	295.2	275.3	102.7	114.8	396.7	389.6	15.4	9.1
High	CDP04357	pep chromosome:AUK_PRJEB4211_v1:9:1755471:1760365:-1 gene:GSCOC_T00017717001 transcript:CDP04357	MAVKSALVFSILLLLFVSVLTTSFASETVEKGKGSEVEEDEDLSFLEEDDAASSSHHDPYAQYHNYENYDDLEDNDSGAAEDGGYEAYTPPAVDEADVVVLKESNFSDFIAKNKYVMVEFYAPWCGHCQALAPEYAAAATELKQEEEKVVLAKVDATEESDLGQKYDIQGFPTVYFFVDGIHTPYPGQRTKEAIVTWVKKKIGPGLNNITTVEEAEQILATESKLVLGFLDAFVGAASEELAAASKLEEDVNFYQTTSSDVAKLFQIDPQVKRPALVIIKKEDEKINHFSGQFTKSAISEFVYKNKLPLVTNFTRDSAPLIFENPIKNQLLLFATANDSEKFLPTFQEAAKAFKGKLLCVYVEMDNEDVGKPVSDYFGVQGDAPRVLAYTGNEDARKFL…	Protein disulfide isomerase-like 1-4; Short=AtPDIL1-4; AltName: Full=Protein disulfide isomerase 2; Short=AtPDI2; AltName: Full=Protein disulfide isomerase-like 2-2; Short=AtPDIL2-2; Flags: Precursor	0	77.974	35	14	34	11	1	579	64.3	4.81	604	14	2	3.299	6.149	1.864	1.72	2.62	0.9	0.000979425	9.58895e-06	0.101568	0.00521445	8.20258e-05	0.409475	1176.1	3879.7	7231.5	6.85	9.93	9.82	1132.5	1079.6	1254.4	1221.3	3646.3	3458.4	4267.3	4128.1	6565.5	6712.7	7790.5	7936	1132.5	957.6
High	CDP06650	pep chromosome:AUK_PRJEB4211_v1:6:2344747:2348074:-1 gene:GSCOC_T00023571001 transcript:CDP06650 description:PPa4 [Source:Projected from Arabidopsis thaliana (AT3G53620) UniProtKB/TrEMBL;Acc:A0A178VKC0]	MAPPSENPTDIETPVKPPKSHHSSHPPLNERILSSLTRRSAAAHPWHDLEIGPGAPMIFNCVVEISRGSKVKYELDKKTGLIKVDRVLYSSVVYPHNYGFIPRTLCEDNDPLDVLVIMQEPVLPGCFLRAKAIGVMPMIDQGEKDDKIIAVCADDPEYRHYNDINELPPHRLAEIRRFFEDYKKNENKEVAVNDFLPASKAYEAVQHSMDLYADYIVESLRR	---NA---	0	10.267	31	4	11	3	1	222	25.2	6.11	117	4	1	3.278	3.586	1.094	1.71	1.84	0.13	7.87909e-05	3.05797e-05	0.97815	0.000782955	0.000196615	1	306.7	1005.2	1099.6	9.81	22.36	26.07	284	283.9	331.1	341.2	849.9	788.1	1189	1227.4	882.2	866.9	1370.5	1397.2	284	251.8
High	CDP10280	pep chromosome:AUK_PRJEB4211_v1:3:12046414:12051440:-1 gene:GSCOC_T00030957001 transcript:CDP10280	MAAGVRRIKLGSQGLEVSAQGFGCMGMSFSYGPPKPEPDMIKLIHHAINSGITHLDTSDVYGPHTNEILIGKALKGVEREKVQIATKFASRILPTGEHVACGHPDYVREACAASLKRLDVDYIDLYFVHRIDRTIPIEITVGALKQLVEEGKVRYIGLSEASPETIRRAHAVHPITAVQLEWSLWTRDAEEVVIPTCRELGIGIVSFSPLGRGFFASGAKLTENLTSNDFRKRIPRFQEENVEHNNKLFEQVAQLATRKGCTPSQLALAWVHHQGDDVCPIPGTTKIENLESNIKALSVKLTLEDRAELESIASANAAKGDRYPPAIMANTWRFANTPPLSSWKATWKGVLALGS	Probable aldo-keto reductase 2	0	96.3	57	20	50	8	1	355	39	7.81	618	20	10	3.276	4.681	1.429	1.71	2.23	0.51	0.00408201	0.000331887	0.674719	0.0156928	0.00145189	1	2210.8	7243.4	10348.5	3.72	10.86	16.19	2184.2	2135.4	2328.2	2237.7	8106.4	7793	6732.6	6486	11749.6	12153.2	8939.7	9114.4	2184.2	1894.1
High	CDP10104	pep chromosome:AUK_PRJEB4211_v1:6:14390694:14391698:1 gene:GSCOC_T00030715001 transcript:CDP10104	MKSSVGFILFLSFHLFLSLPYPSLSVHAKCNAHDKQVLLEIKAAFNNPYHLASWNPDVDCCEWYALDCDRNTGRVIALTIFAGNISGEIPPAVGDLPYLQNLMFHKLTNLTGQIPSAVTKLVRLKELTISWTNLSGPVPSFLGQLKNLTSLDLSFNDLTGSIPPSLSELPNLLDLHLDRNKLTGSIPDSFGRFAGNTPDLFLSHNMLSGPVPKSLGNVNFSIQIDFSRNKLEGDPSFFFGKNKTIQFVDLSRNLFEFDLSKVEFPNSLTYLDLNHNKVFGSLPVGLTELNLQFFNVSYNRLCGQIPQGGKLQSFDSYNYFHNRCLCGAPLPACK	Polygalacturonase inhibitor; AltName: Full=Polygalacturonase-inhibiting protein; Short=PGIG; Flags: Precursor	0	32.406	20	7	17	6	1	334	37.1	7.2	249	7	1	3.264	1.132	0.347	1.71	0.18	-1.53	0.000159139	0.962602	0.000519433	0.00131947	1	0.00874788	2314.6	7555.7	2619.2	6.7	8.46	15.19	2216.8	2165.2	2489.3	2416.7	7263.2	6901.9	8355.9	7859.9	2299.5	2313	2965.9	3039.3	2216.8	1920.6
High	CDP17032	pep chromosome:AUK_PRJEB4211_v1:1:38031776:38038860:-1 gene:GSCOC_T00004935001 transcript:CDP17032	MTGDEESGSPLSGHPNTNQLPAAATTQGQIHATTAAATNGDLVVTAQQDKEEPTTTTANTVPFLKLFSFADSTDIFLMIIGTIGAIGNGLSLPLMTVFFGELTDSFGQTQNIKDVVRVVSKVSLKFVYLALGSAVAGFLQVSCWMITGERQAARIRSLYLKTILRQDVGFFDKETNTGEVVGRMSGDTVLIQDAMGEKVGKFIQLVSTFIGGFIIAFAKGWLLTLVMLSSIPPLVIAGGLMSLVISRMASHGQEAYAKAAIVVEQTIGSIRTVASFTGEKQAVADYDKSLRKAYRSGVHEGLATGLGLGSVMCLVFCSYALAIWFGAKMIAEKKNTGGEVLNVIIAVLSGSMSLGQASPCMTAFASGRAAAFKMFETINRTPEIDAYDASGKTLDDIRG…	ABC transporter B family member 14; Short=ABC transporter ABCB.14; Short=AtABCB14; AltName: Full=Multidrug resistance protein 12; AltName: Full=P-glycoprotein 14	0	12.145	3	2	4	2	1	1316	141.5	8.1	88	2	0	3.246	1.62	0.499	1.7	0.7	-1	0.121398	0.769739	0.619587	0.273413	1	1	180.5	585.9	292.3	73.07	47.52	45.54	68.4	98.5	330.6	390	381.5	373.1	910.2	899.7	195.7	197.8	469.5	432	68.4	87.4
High	CDP03645	pep chromosome:AUK_PRJEB4211_v1:1:36194565:36196877:-1 gene:GSCOC_T00016076001 transcript:CDP03645	MATKPIKFCVVDAFADQAFKGNPAAVCVLEDDKDEEWMQSVATEFNISETCYLTRIVDSDSQSTTPRFKLRWFTPVAEVKLCGHATLAASYFLFSYGLVNSDKIEFLTLSGILTAKKVPDSKTSNSIDHQNGDIQEDYFVELDFPVVPIAAPNSAEISEISKSLNGASVVEIHKTTTEEDLLVVLPSGKAVVEAEPLFDEIKRCPGRGLIITGPAPPESGFDFYSRFFCPKYGINEDPVCGSAHCALAPYWSKKLGKCDFVAYQASPRSGVLHLHVDEKNQRVLLRGKAVVVTEGSILV	---NA---	0	79.641	75	14	42	14	1	299	32.8	5.22	842	14	0	3.236	3.54	1.094	1.69	1.82	0.13	0.00269995	0.00131618	0.995226	0.0113674	0.00450435	1	2961.3	9582.4	10482.4	17.18	18.76	17.92	2605	2510.5	3517.1	3366.3	8224.3	7925.7	11164.7	11232.2	8860.3	9033.9	12163.3	12295	2605	2226.8
High	CDO99844	pep chromosome:AUK_PRJEB4211_v1:2:8365389:8371998:1 gene:GSCOC_T00029540001 transcript:CDO99844	MHSTHLLLEEPIRMASILEPSKPNFFPAMTKIVGTLGPKSRAVEIISGCLKAGMSVARFDFSWGDTEFHQETLENLKVAIKSTKKLCAVMLDTVGPELQVVNKTEHPISLKAESLVTLTPDQDKEASSSLLPINFTGLPKAVKAGDTIFIGQYLFTGSETTSVWLEVTEVKGEDVVCLIKNSATLAGSLFTLHVSQIHIDLPTLTDKDKEVISTWGVRNNIDFLSLSYTRHAEDVRQAREFLSKLGDLSQTHIFAKIENVEGLTHFDEILQEADGIILSRGNLGIDLPPEKVFLFQKAAVYKCNMAGKPAVVTRVVDSMTDNLRPTRAEATDVANAVLDGSDAILLGAETLRGLYPVETISIVGKICAEAEKAYNQDLYFKKTVKYVGEPMTHLESIAS…	Pyruvate kinase 1, cytosolic; Short=OsPK1	0	109.743	45	17	53	7	1	527	57.6	6.99	1191	17	10	3.235	2.84	0.878	1.69	1.51	-0.19	3.91464e-07	1.86771e-06	0.778411	1.80593e-05	2.10288e-05	1	1670.1	5403.3	4743	7.68	0.7	4.8	1711.7	1851.9	1548.7	1629.5	5476	5395.1	5399.1	5407.5	4976.9	4905.8	4585.6	4519.8	1711.7	1642.7
High	Q43299	Phosphoenolpyruvate carboxylase OS=Amaranthus hypochondriacus OX=28502 PE=2 SV=1	MASGKVEKMASIDAQLRLLAPKKVSEDDKLVEYDALLLDRFLDILESLHGSGIRETVQELYEHAAEYERTHDTKKLEELGNLITSLDAGDSIVIAKSFSQMLNLANLAEEVQLAYRRRIKKTKKGDFADESSAITESDFEETLRRLVDLKKSPEEIFATLKNQTVDLVLTAHPTQSVRRSLLQKHGRIRDCLSQLYAKDISPDDKQELDEALQRAIQAAFRTDEIRRVQPTPQDEMRMGMSYFHETIWKGVPKFLRRVDTALKNIGINERVPYNVPLIQFSSWMGGDRDGNPRVTPEVTRDVVLLARMMAANMYFTQITDLMFELSMWRCNDEVRARAQELHSQSKSDAKHYIEFWKQIPLSEPYRVILGDVRDKLYNTREHAHKLLANGSSDVPEEST…	Phosphoenolpyruvate carboxylase; Short=PEPC; Short=PEPCase	0	11.879	3	3	9	1	1	964	109.4	6.47	52	3	0	3.233	2.157	0.667	1.69	1.11	-0.58	0.133152	0.523121	0.873588	0.295147	0.784244	1	116.4	376.3	251.1	65.01	61.83	60.74	61.8	64	211.6	234.7	215.7	192.3	688.7	656.5	146.4	124	438.2	430.6	61.8	56.8
High	CDP20459	pep supercontig:AUK_PRJEB4211_v1:scaffold_1220:5565:10219:-1 gene:GSCOC_T00004885001 transcript:CDP20459	MGEENKVIVLGNWSSPFVKRVELALKTKGIRFEYVEEDLSNKSALLLKYNPVHKKVPVLVHNGKPVCESLVILEYIDETWQNGPHLLPKDPYERARVRFWVAYIHQLLDSMAKLYTPDKEAQEKALKEVHEKLRVLEDGMKENFPGGSPDVRAKKLEILDIMMIATVGSFKTHEEALGVQILHPERNPLTFSWVQALNELPVVKESNPPYEKLIALLQSLKEILLGNKKLGKMYTARFF	Glutathione S-transferase U9; Short=AtGSTU9; AltName: Full=GST class-tau member 9; AltName: Full=Glutathione S-transferase 14	0	19.736	23	6	7	5	1	239	27.4	8.44	51	6	1	3.222	7.452	2.313	1.69	2.9	1.21	0.642003	0.165	0.841284	0.993858	0.295837	1	398.1	1282.6	2967	100.62	47.2	50.59	105.6	107.8	1592.7	1470.7	833.9	828.1	1987.6	1972.6	1891.4	1861	4654.3	4927.5	105.6	95.6
High	CDP09987	pep chromosome:AUK_PRJEB4211_v1:8:27556160:27558749:1 gene:GSCOC_T00030510001 transcript:CDP09987	MAASASIIPSNATATAKFRATSTAATTPLSPPSVLKFPSISPNYPSTKPLISHSALPHFQHKPLSAVTPLNASSTPPPTATASTFHGVCYVVGDNLDTDQIIPAEYLTLVPSNPEEYKKLGSYALIGLPSSYQTRFVEPGQFKSNYSIVIGGDNFGCGSSREHAPVALGAAGVAAVVAESYARIFFRNSVATGEIYPLESEGRLWWYICLCPKNWDDSCVGNLMVLRLRRFTILASWQKGCTTQL	---NA---	0	48.184	30	5	15	5	1	245	26.3	8.24	540	5	0	3.217	2.124	0.66	1.69	1.09	-0.6	0.000372937	0.0174201	0.303457	0.00256937	0.042298	0.865756	532.2	1711.9	1130.3	20.16	27.47	24.11	632.6	637.1	447.7	444.6	2196.1	2164	1330.9	1354.3	1397.2	1390.9	906.7	918.5	632.6	565.1
High	CDP07438	pep chromosome:AUK_PRJEB4211_v1:10:1556292:1557787:1 gene:GSCOC_T00024704001 transcript:CDP07438	MGAQVSKQAERRKNVSTEMKALADLKQSSGSDFPGSDYRPADRKNWMLGLDPGKLVIEKIVWPGTHDSATNKIGIPCITRPFAQCQSLSIYRQLVRGARVVDIRVQEDRRVCHGILLTYSVDVVINDVKKFLSETQSEVIVLEIRTEFGHDDPPEFDKYLEDQLGEYLIPQDDSVFGKTIAELLPKRVICVWKPRKSPQPQHGSPLWSAGYLKDNWIDTDLPSTKFDSNMKHLSQQPPVNSRKFFYRVENTATPQADNPILCVKPVTNRIHGYARLFIIECLSKGYVDRLQIFSTDFIDEDFVDACVGLTQARIEGKL	---NA---	0	5.942	18	2	4	2	1	318	36.1	7.37	35	2	0	3.217	0.478	0.149	1.69	-1.07	-2.75	0.00136361	0.025764	1.15903e-05	0.00650339	0.0596784	0.000555073	115.6	372	55.3	35.76	32.93	17.52	81.4	87.1	164.7	153.5	268.1	281.4	495.7	491.7	50.2	43.1	60.9	63.7	81.4	77.3
High	CDP02656	pep chromosome:AUK_PRJEB4211_v1:7:5580912:5583171:-1 gene:GSCOC_T00040111001 transcript:CDP02656	MASAIVRSGLRSAIRGGASRTAPAPASKRTFSASAHHDEAAEASKWEKITYLGIATCSTLAVYNLSKGHHHHEEPPPYPYLHIRNKEFPWGPDGLFEEKHH	---NA---	0	6.866	15	1	3	1	1	101	11.1	8.76	121	1	0	3.216	2.163	0.673	1.69	1.11	-0.57	1.77843e-10	2.20741e-08	7.07004e-05	5.27754e-08	6.13287e-07	0.00239347	207.9	668.6	449.7	12.21	9.13	4.28	179.8	192.1	232.3	225	665.7	590.8	671.5	739.8	471.1	464.9	435.1	434.5	179.8	170.4
High	CDP18160	pep chromosome:AUK_PRJEB4211_v1:9:4401052:4407175:1 gene:GSCOC_T00007056001 transcript:CDP18160	MANTLFSRAFLIVSTLVLSSTSFLTEARFVVEKSSISILDPSDIRSKHDAAIGNFGVPDYGGSMVGTVVYPDTGATGCSPFEGDKPFRSKSSTPTILLLDRGGCYFALKVWNGQQAGAAAVLVADSVDEPLITMDSPEESSDADGYLEKIGVPSVLIDHSVGESIKGALKKAANVVVKIDWSESMPHPDQRVEYELWTNSNDECGIRCDEQMNFIKNFKGNAQILEKGGYTRFTPHYITWYCPHAFLLSSQCKSQCINHGRYCAPDPEQDFGMGYQGKDVVFENLRQLCVHRVANESNRSWVWWDYVTDFHIRCSMKQKKYSKECAEEVMRSLHLPIEKIKSCMGDPEADVENQVLKIEQDLQVGRGSRGDVTILPTLVINDVQYRGKLERIAVLKAIC…	---NA---	0	6.88	4	1	4	1	1	632	70.2	5.53	34	1	0	3.191	2.917	0.914	1.67	1.54	-0.13	0.0254937	0.0271869	1	0.0732456	0.0625483	1	25.3	80.7	73.8	47.98	37.7	10.47	15.6	17.2	37.1	41.6	68.7	45	114.9	94.8	76.4	86.5	71.3	68.5	15.6	15.3
High	CDP00960	pep chromosome:AUK_PRJEB4211_v1:10:7294544:7297163:-1 gene:GSCOC_T00034430001 transcript:CDP00960	MHNMCIRPTPEELENFGTPDFTIYNAGQFPCNRYTHYMTSSTSIDMNLDRREMVILGTQYAGEMKKGLFSLMHYLMPKRGILSLHSGCNIGKGGDVALFFGLSGTGKTTLSTDHNRYLIGDDEHCWSENGVSNIEGGCYAKCIDLSREKEPDIWNAIKFGTVLENVVFDEHYREVDYTDKSVTENTRAAYPIEYIPNAKIPCVGPHPKNVILLACDAFGVLPPVSKLNLAQTMYHFISGYTALVAGTEDGIKEPTATFSACFGAAFIMLHPTKYAAMLAEKMKKHGATGWLVNTGWSGGSYGSGSRIKLAYTRKIIDAIHSGTLLKANYTTAEVFGLEIPTEIEGVPSEILNPENTWSDKKAYKDTLLKLGGLFKKNFEVFTNYKIGADNKLMEEIVAA…	Phosphoenolpyruvate carboxykinase (ATP) 1; Short=AtPCK1; Short=PEP carboxykinase 1; Short=PEPCK 1	0	35.542	28	7	18	7	1	403	44.5	6.52	447	7	0	3.188	8.546	2.68	1.67	3.1	1.42	0.00995721	2.86244e-05	0.0391753	0.0332842	0.000186351	0.204858	539.4	1719.8	4609.7	34.36	38	33.81	407.6	368.7	716.7	713.9	1229.1	1227.7	2459.3	2406.3	3307.7	3462.7	6136.7	6232	407.6	327
High	CDP07111	pep chromosome:AUK_PRJEB4211_v1:1:29854725:29857883:1 gene:GSCOC_T00024229001 transcript:CDP07111	MAKDVEGVVAAEQGEFSAKDYHDPPPAAFFDLDELTKWSFHRALIAEFVATLLFLYVTVLTVIGYKHQTDATAGGDDCNGVGILGIAWAFGGMIFILVYCTAGISGGHINPAVTFGLFLARKVSLLRAFFYMVAQCLGAICGVGLVKAFQKSFYNRYGGGANVVAHGYTIGVGLAAEIIGTFVLVYTVFAATDPKRNARDSHIPVLAPLPIGFAVFMVHLGTIPVTGTGINPARSFGAAVIYGSRQAWDDHWIFWVGPFVGAAIAAFYHQYILRAGAIKALGSFRSNA	Aquaporin PIP2-2; AltName: Full=Plasma membrane intrinsic protein 2-2; Short=AtPIP2;2; AltName: Full=Plasma membrane intrinsic protein 2b; Short=PIP2b; AltName: Full=TMP2b	0	50.255	28	6	19	6	1	288	30.7	7.88	495	6	0	3.162	0.622	0.197	1.66	-0.69	-2.35	0.00414713	0.317398	0.000105941	0.0159055	0.519671	0.00319805	1339.7	4236.4	833.2	21.06	12.19	26.62	1152.3	1149	1557.6	1732.9	3877.9	3660.9	4628	4660.4	663.5	649.3	1052.6	1046.4	1152.3	1019.2
High	CDP20599	pep supercontig:AUK_PRJEB4211_v1:scaffold_1412:18692:23233:1 gene:GSCOC_T00007586001 transcript:CDP20599	MESRVILLLLLCLLSIPSDLSVSAGQFSRWGGGKKLKGSAVKLATGASSAPFDPTRVTQLSWKPRAFIYRGFLTNEECDHMINLAKNKMEKSMVADNDSGKSIESEVRTSSGMFLKKHQDDIVGGVEAKIASWTFLPVENGEAMQVLHYEHGQKYEPHFDYFHDKENQKLGGHRVATVLMYLSDVAKGGETVFPSSEKKETQPKGDDDWSDCAKNGYAVKPRKGDALLFFSLHPDATTDPLSLHGSCPVIEGEKWSATKWIHVRSFDALSTSEDCVDKDPNCPHWAASGECEKNPLYMVGSEEAVGYCRESCKICSS	Probable prolyl 4-hydroxylase 6; Short=AtP4H6	0	8.041	12	2	3	2	1	317	35	6.33	39	2	0	3.16	3.054	0.967	1.66	1.61	-0.05	0.0819669	0.0874233	1	0.197883	0.173353	1	155.9	492.6	476.1	68.53	20.78	14.49	74.4	80.7	306.6	301.1	433.2	375.9	560.1	589.4	422.3	414.2	536.7	539.6	74.4	71.6
High	CDP10287	pep chromosome:AUK_PRJEB4211_v1:3:12126571:12132460:1 gene:GSCOC_T00030966001 transcript:CDP10287	MSAFYGPPKPEPDMIKLIHYAIDRGITHFDTAEMYGPYTNEILVGKALKGGIQEKVEIATKFGVRFVDGKREVCGDPAYVRAACEGSLKRLGVDCIDLYYQHRIDTRLPIEITIGELKKLVEEGKIKYIGLSEASASTIRRAHAVHPITAVQLEWSLWTRDVEEEIIPTCRELGIGIVAYSPLGRGFFSSGPKLMENLADGDFRKFLPRLQPENVEHNKSLFERVNDIASRKGCTPSQLALAWVHHQGSDVCPIPGTTKIENLKENIGALSVKLLAEDLAELECLASSGVKGDRYGSGTATWQNSDTPPLSTWKSA	Probable aldo-keto reductase 2	0	70.822	34	12	51	4	1	316	34.9	6.54	678	12	0	3.149	3.673	1.166	1.66	1.88	0.22	0.151062	0.0799856	0.995398	0.322555	0.161008	1	90.8	286	333.6	52.25	63.61	70.49	145.8	149.2	54.7	56.6	520.1	525	157.2	145.5	705.9	646.1	172.2	157.2	145.8	132.3
High	CDP01901	pep chromosome:AUK_PRJEB4211_v1:7:7894294:7895553:-1 gene:GSCOC_T00037081001 transcript:CDP01901	MAILKACAFLILSALLLIHLTDAAQVVSKGVPSPSPSPLPAPKPIDCGAACGYRCSKTKRPNLCKRACGSCCAKCSCVPPGTSGNYEACPCYYNLTTVIKSTGKVVRKCP	---NA---	0	6.375	24	1	2	1	1	110	11.4	8.88	22	1	0	3.145	3.135	0.997	1.65	1.65	0	0.00652264	0.00847665	0.9999	0.0234545	0.0224805	1	24.7	77.8	77.6	12.26	53.38	44.41	24.7	30.6	23.5	24.8	47.5	47.5	127.5	130.7	55.3	46	108.9	117	24.7	27.1
High	CDP12300	pep chromosome:AUK_PRJEB4211_v1:4:26945606:26948562:1 gene:GSCOC_T00035762001 transcript:CDP12300	MAATSAATLSIGSTACVGAKANSAYNSKTSGLSFNSRNCLRSFTGLKAASSVSCDSDSSFVGKESCAAIQHSFVSRAQKPSQRSYNYVQPRASYKVAILGAAGGIGQPLALLIKMSPLVSTLKLYDVANVKGVAADLSHCNTPSQVFDFTGDKELASCLKDVNVVVIPAGVPRKPGMTRDDLFNINASIVKDLIEAVADNCPDAFIHIISNPVNSTVPIAAEVLKQKGVYDPKKLFGVTTLDVVRANTFVAQKKNLRLIDVDVPVVGGHAGITILPLLSKTKPSVAFTDEEVQELTVKIQNAGTEVVEAKAGAGSATLSMSYAAARFVESSLRALDGDSDVYECSYVQSNLTELPFFASRIKLGRNGVEALIKSELEGLTEYEQKALEALKPELKASIE…	Malate dehydrogenase, chloroplastic; AltName: Full=Chloroplastic malate dehydrogenase; Short=Chloroplastic MDH; Short=cpNAD-MDH; AltName: Full=Plastidic NAD-dependent malate dehydrogenase; Short=pNAD-MDH; Flags: Precursor	0	81.697	41	11	38	10	1	412	43.6	8.06	867	11	0	3.143	2.913	0.927	1.65	1.54	-0.11	5.53425e-05	9.81045e-05	0.99694	0.000610084	0.000523596	1	1118.7	3515.7	3259	25.61	17.62	17.94	882.9	914.3	1444.2	1368.8	3083.6	2893.2	4096.3	4008.3	2835.6	2797.3	3745.7	3937.4	882.9	811
High	CDP14027	pep chromosome:AUK_PRJEB4211_v1:2:5190736:5194078:-1 gene:GSCOC_T00039200001 transcript:CDP14027 description:GDSL esterase/lipase CPRD49 [Source:Projected from Arabidopsis thaliana (AT3G11210) UniProtKB/Swiss-Prot;Acc:Q9SRM5]	MVGPLRPQFVLFGSSIVQLSFSNEGWGATLTDIYPRKADIILRGYYGWNSRRALQVLDQVFPKDAAIQPALVIVYFGGNDSIGPHPSGLGPHVPLAEYVENMRKIAIHLKSLSDSTRLIFLSCPPVNEAVLQASHNPMLSEIVRTNELCQMYSEALIELCKEMGLKVIDLFNAIQKRDDWLTACFTDGVHFSAEGSNIVVEEVLKVLREADWVPSLHWKSMPAEFSEGSPYDLVAADGKSTINASEWNHWEGQWE	---NA---	0	24.902	18	3	9	3	1	255	28.5	5.2	279	3	0	3.127	2.935	0.939	1.64	1.55	-0.09	0.0386324	0.054231	0.999728	0.103728	0.115003	1	699.1	2185.9	2051.7	5.95	7.85	9.61	657.8	670.6	741.6	728.8	2078.3	1985.3	2338.8	2299.1	1833.9	1919.1	2193.4	2227.6	657.8	594.8
High	CDP17110	pep chromosome:AUK_PRJEB4211_v1:1:37410662:37413819:-1 gene:GSCOC_T00005030001 transcript:CDP17110	MENIKHQSVVVNGINMHVAEVGEGPAVLLLHGFPELWYSWRHQMLYLASKGYRALAPDLRGYGDSDAPPSPSSYTAFHVVGDLVALLNSLGLDKVFLVGHDWGSLIAWHLCLFRPDRIKALVNMSCVYHYFDPKNPSKKPLEEMRETFGDDYYVCRFQATGEVEEEFAGVDTAELVKAFLSNRDTRPPCIPRGGFQYFAHQNPNPLPEWLTQEDLNYYATKFKKTGFSGGFNFYRCIDLNWELSAPWREAQIQVPVKFVVGDLDLTYHIPGIQDYIHNGGFKKDVPDLQEVIVIPGAAHFINQEKADECSIHIYDFISKF	---NA---	0	12.342	10	2	5	2	1	320	36.4	5.85	163	2	0	3.122	4.855	1.555	1.64	2.28	0.64	0.106188	0.0150072	0.815415	0.243838	0.0372742	1	165.5	516.8	803.5	50.95	52.81	53.68	101.8	105.5	259.6	273.9	326	298.1	819.2	853.5	492.4	474.7	1335.5	1311.2	101.8	93.6
High	CDP07840	pep chromosome:AUK_PRJEB4211_v1:8:18550312:18556270:-1 gene:GSCOC_T00025290001 transcript:CDP07840	MMRKKSTQPITLFLLFILFLAIIINSCLSCPIKIVGAHSYDSRFPAGDADEEENEQCKAWLVQSIPTDMPHLPRVPGVLSSADVLRWLAGNSSETLDIIAQYWQLVAQPNDPRSGDYGYSKEEMQKFGANEGFEVYRELENAANRNIKIRLLQHSGVYPDYTDEPSNLASGRPNVKSVTLLLRDWWGSGVVHTKVWISDGQDVYIGSANNDWKSLTQVKELGIYLVGCPAIARKVSTYFANLWKLAHLNVSSYTKVAWDKQWQVRRKFPCWSHFLHPKVRCRTPLYDIVEIPHVIGYPMLSDPSMFHIPIETPGYNGSTLQTESSYLSFAPPELSFGRYQTDEQAWVDTIKSVRKGSTIRISTMDWLGQSQYTTNKVYWASLSSAISEIVFSKHAKVKI…	---NA---	0	10.464	6	2	4	2	1	540	61	7.69	109	2	0	3.112	1.074	0.345	1.64	0.1	-1.53	0.00621611	0.998916	0.0102448	0.0225032	1	0.0775223	177.9	553.6	191.1	29.43	27.64	25.36	138.6	134	228.4	230.6	436.1	433.5	713.6	702.9	147.9	156	240.2	234.1	138.6	118.9
High	CDP19299	pep chromosome:AUK_PRJEB4211_v1:2:28784789:28801213:-1 gene:GSCOC_T00011528001 transcript:CDP19299 description:Alpha-N-acetylglucosaminidase [Source:Projected from Arabidopsis thaliana (AT5G13690) UniProtKB/Swiss-Prot;Acc:Q9FNA3]	MQISNSLILLSLLSSLILCSSSSSIQESEAAIESLLKRLDSKRSPASVQEAAARGVLQRLLPTHLSSFEFKIVSKDGCDGRSCFRISNYKSSRRNSPQILIEGTTATEITSGLHWYLKYLCYVHVSWDKTGGIQIASVPKPGALPRVSDNVVIIQRAVPWNYYQNVVTSSYSYVWWDWERWEKEIDWMALQGINLPLAFTGQEAIWQKVFTEDFNITAEDLNDFFGGPAFLAWARMGNLHAWGGPLSQNWLDKQLLLQKQILARMLELGMTPVLPSFSGNVPAALKAIYPSANISRLGEWNTVDADPRWCCTFLLDPSDPLFVEIGEAFIKQQFKEYGDITNIYNCDTFNENSPPTDDPTYISSLGSAVYAAMSKADKDAVWLMQGWLFYSDSSFWKPP…	Alpha-N-acetylglucosaminidase; AltName: Full=N-acetyl-glucosaminidase; Short=AtNAGLU; AltName: Full=Protein CYCLOPS 1; Flags: Precursor	0	29.209	12	7	9	7	1	809	92.3	5.71	125	7	0	3.109	1.858	0.598	1.64	0.89	-0.74	0.00143785	0.116148	0.193784	0.00678232	0.219668	0.643285	407.9	1268.3	758	24.64	45.35	33.74	500.6	513.9	325.8	332.3	1949	1891	825	850.6	1013.1	1000.7	574.1	530.8	500.6	455.8
High	CDP17749	pep chromosome:AUK_PRJEB4211_v1:2:51736612:51741614:1 gene:GSCOC_T00003853001 transcript:CDP17749	MERHMLCFPADAPPLAVIVASKIAGLSLPTDPSLPSGSTPILHFSDGGKLRGLCVLLRYIGRVAKIPDFYNRDAFESTQIDEWLEYAPVFSSGSEFEGACGYVDRYLLQHTFLVGQSLSIADIAIWSALAGTGQRWQSLRNSKKYQNLVRWFNSIHDEFDAALNEVTAMYIGKKGLGTQAVSKVRDQQVSTSSSNSVNGAVSEKGVGGNRPVFEVHLPDAQVGKVRVRFAPEPSGYLHIGHSKAALLNKYFAEKYDGKLIVRFDDTNPDKESSEFVDNLLKDIETLGITYEAVTYTSDYFPNMIEMAEKLIHEGKAYVDDTTREKMQQERMDGIESKCRSNSVEENLSLWKEMVAGSERGLMCCLRGKLNMQDPNKSLRDPVYYRCNLTPHHKIGAKYK…	Glutamate--tRNA ligase, cytoplasmic; AltName: Full=GluRSAt; AltName: Full=Glutamyl-tRNA synthetase; Short=GluRS	0	28.72	12	5	11	5	1	736	83.5	6.84	173	5	0	3.098	2.239	0.723	1.63	1.16	-0.47	0.00113121	0.0183629	0.608598	0.00559799	0.0442685	1	535.5	1659.1	1199.1	35.86	23.49	21.23	395.5	394.2	725.2	771.5	1356.2	1334.1	2034.5	2029.7	994.3	1003.6	1432.8	1463.7	395.5	349.7
High	CDP10303	pep chromosome:AUK_PRJEB4211_v1:3:12402439:12409177:1 gene:GSCOC_T00030984001 transcript:CDP10303	MAASEEVKVPRIKLGSQGFEVSAQGLGCMGMSAFYGPPKPEPDMIKLIHHAISRGITHLDTSDIYGPHTNEILIGKALKEGIRAKVELATKFAISYQDGKVDVRGDPAYVRACCEASLKRLDVDCIDLYYQHRIDTRVPIEVTIGELKKLVEEGKIKYIGLSEASASTIRRAHAVHPITAVQLEWSLWARDVEEEIIPTCRELGIGIVAYSPLGRGFFSSGPKLVENLAEGDCRKDMPRFQAENLEHNKKLYERANAIASRKGCTPSQLALAWVHHQGNDVCPIPGTTKIENLNQNIGALSVKLSAEEMAELESIASAGVKGDRYAPGLGTWQTSETPPLSTWKRT	Probable aldo-keto reductase 2	0	91.577	57	16	60	3	1	346	37.9	7.03	1053	16	2	3.087	3.821	1.238	1.63	1.93	0.31	4.82382e-06	4.6808e-07	0.482476	0.000108945	6.70643e-06	1	423.1	1306	1616.7	8.46	5.22	6.83	474.7	441.7	395.3	405.2	1365.5	1331.7	1280.9	1209.9	1721.7	1712.5	1524.5	1526.3	474.7	391.8
High	CDP07006	pep chromosome:AUK_PRJEB4211_v1:1:28754640:28760960:1 gene:GSCOC_T00024085001 transcript:CDP07006 description:Protein argonaute 5 [Source:Projected from Arabidopsis thaliana (AT2G27880) UniProtKB/Swiss-Prot;Acc:Q9SJK3]	MSGRGRGRGGGGPGGGGGGRGSYSPAFGRSRGRGRGRDGGRGSSSGYNAPPPQPAGASAAGSSSSASTISRELEQKLTFQASSSGSEVPVQRPGEQAVTEERKLPPASSKATRFPQRPGFGTVGQKCVVRANHFLVGVADRDLHHYDVSITPEVSSKKVCRDVMRELVKSHKLSHLGNRALAYDGKKNVYAAGPLPFSSKEFIIKLSDKGDGPKREREFKVSIKFASKADLHHLQQFLRSEQLDVPQETIQALDVVLRESPSNNYTVVGRSFFHPTLGGRGDLGDGVEYWKGFYQSLRPTQMGLSLNIDVSATAFYEPISVLDFIAKYLNIRDLTRLSDQDCIKVKKALTRLRVQHTYLGHVRRYRISGISDKPTNKLTFVCDGIDVTVVQYFAEKYKI…	Protein argonaute 5	0	53.246	13	8	13	7	1	959	106.6	9.41	261	8	0	3.079	4.123	1.339	1.62	2.04	0.42	0.221846	0.0778085	0.9676	0.443601	0.157485	1	275.9	849.7	1137.7	58.75	60.26	58.52	456.9	497.1	146	166.7	1511	1480.6	452.9	487.6	2060.5	1956.4	661.6	655.8	456.9	440.9
High	CDP12145	pep chromosome:AUK_PRJEB4211_v1:8:30587068:30591859:-1 gene:GSCOC_T00035541001 transcript:CDP12145	MRPISSIVFAFLAAALLLNHCKAAAEWVTCSGIVPMRYRNDKISITDFGGVGDGRTLNTKAFREAIYRIEHLRRRGGTLLYMPPGVYLTESFNLTSHMTLYLARGAVIKATTDTRYWPLIAPLPSYGRGRELPGGRYMSFIHGDGLHDVIITGENGTIDGQGEIWWNMWRRRTLQFTRPNLIEFMNSRGIIVSNVIFKNSPFWNIHPVYCSNVVINYVTILAPADSPNTDGIDPDSSTHVCIEDSYISTGDDLVAVKSGWDEYGIAYGRPSHGITIRRVTGSSPFAGIAIGSETSGGIEDVLAEHINLYNMGVGIHLKTNVGRGGVIRNITVSNVYMQNARKGIKIAGDVGDHPDTNYNPNALPVVKDVTIKDVWGEGVLQSGQIQGLKNSPFTGICLS…	Probable polygalacturonase; Short=PG; AltName: Full=Pectinase	0	9.886	12	3	3	3	1	447	48.8	8.1	40	3	0	3.063	1.032	0.337	1.62	0.05	-1.57	0.00880427	0.999994	0.010035	0.0298713	1	0.076351	127.4	390.3	131.5	3.93	24.06	56.72	128.3	122.4	126.5	134.5	325.6	308.1	468	495.1	72.3	80.6	231.3	214.4	128.3	108.6
High	CDP07623	pep chromosome:AUK_PRJEB4211_v1:2:24021281:24023092:1 gene:GSCOC_T00024937001 transcript:CDP07623	MLFACAIIALIVILFSHWVYRWRNPKCNGVLPPGSMGLPIIGETIQYFTPYASDDVPPFVQKRVARYGPIFRTSIVGQPIVVSTDADVNYRVFQQEGNAFQIWYTESLFQIIGKQSVVAHHGDFHKYLKSLTFKFVSPEALRERLIYEMDASTQESLSSWSKLGKLDARDGTAELVFKYAARKMLGYDESRDRQKLRDSYKAFMDGLISFPLNIPGTPFHACLQGRKKAMKVIHDIFEKKRSGNNGATNDYDFADHLLEEIKKEDTFLNEEIARDLVFLFLFAAHETTSTSLTVALRYLDTHPRVMAELKVHDFPKQFLPLLSVFTLQFSNSCPSSILKGLILYIY	Cytochrome P450 87A3	0	75.204	40	9	55	7	1	346	39.5	8.35	530	9	0	3.053	5.386	1.764	1.61	2.43	0.82	0.0152274	0.00044366	0.380737	0.0475064	0.00185652	0.990617	607.2	1853.5	3270.3	61.43	13.46	12.03	304	365.5	1008.6	1149.3	2119.9	2053.1	1673.3	1634.4	3607.2	3651.9	2926.8	2964.9	304	324.2
High	CDP21488	pep supercontig:AUK_PRJEB4211_v1:scaffold_4500:2634:5963:1 gene:GSCOC_T00003233001 transcript:CDP21488	MPAVGITWGRFSDTYKFRGAIAYVHTLPSSIFNWLSTIFFSGEKMASKGSQNGEFSFATSPTIARGRHGLPKIHTEKKKEEDEICHDDSAPPVKAKTLDELHSLQRKKSAPTTPITGTQGAFGATLSEEERHRQQLQSISASLASLTRETGPKVVRGDPARSGETPRVEHVTHHHYAPTFAVSDSALKFTHILYNLSPAELYEQAIKYEKGSFITSSGALATLSGAKTGRSPRDKRVVKDETTEDELWWGKGSPNIEMDEHTFLVNRERAVDYLCSLEKVNTLAL	---NA---	0	58.937	45	11	26	11	1	285	31.5	8.05	478	11	0	3.042	7.687	2.527	1.6	2.94	1.34	0.0354433	0.000191678	0.090731	0.0966402	0.000909777	0.376273	896.4	2726.8	6890.9	10.13	5.59	1.47	803.3	831.8	979.8	966.1	2543.6	2624.2	2846.3	2833.4	6892	6831.3	7066.6	6889.7	803.3	737.8
High	CDP17023	pep chromosome:AUK_PRJEB4211_v1:1:38112523:38117978:-1 gene:GSCOC_T00004922001 transcript:CDP17023	MDDSCAVCAESLEWVAYGACGHKDVCSTCVVRLRFICHDRRCCICKTTSDFIFVTKALGDYTRMINDFSAFPSEPKEGRLGSFWYHEDTQAFFDDVDHYKMIKAMCRLSCSVCDAKMLDELPNNDASRRRPRFRSIEQLKGHLFHQHRLVMCSLCLEGRKVFICEQKLYTRAQLDQHISTGDSEVDGSESERGGFMGHPMCEFCRTPFYGDNELYSHMSTEHYTCHICQRQHPGQYEYYKNYDDLEIHFRRDHFLCEDEACLAKKFIVFQSEAELKRHNTLEHGGRMSRSKRNAALQLPTSFRYRRSNEQENRRGRGRTFRRDTSETDLSLAIQASLEASNLDGRIPNATSSSGRASASGEISDVDPLISPLESLATTDSEQSSRYREALSQNSGNAPL…	---NA---	0	9.564	4	1	3	1	1	853	94.3	7.85	83	1	0	3.01	2.365	0.786	1.59	1.24	-0.35	0.00110588	0.00765465	0.761533	0.00549215	0.0205436	1	21.8	65.7	51.6	25.45	11.26	43.97	26.8	26.7	17.8	16.4	76.5	68.7	62.8	59.3	72.4	82.3	33.5	36.8	26.8	23.7
High	CDP17189	pep chromosome:AUK_PRJEB4211_v1:2:47535878:47538263:-1 gene:GSCOC_T00000655001 transcript:CDP17189	MLVYQDLLSGDELLSDSFPYKEIENGMLWEVEGKWVVQGAVEVNIGANPSAEGGEEDEGVDDQAVKVVDIVDTFRLQEQPAFDKKQFVAYIKKYIKNLSPKLEPEKLDAFKKNIEGATKYLLSKLSDLQFFVGESMHDDGSIVFAYYKEGATDPTFLYLAPGLKEVKC	---NA---	0	45.688	45	3	43	2	1	168	18.8	4.6	218	3	0	3.002	2.342	0.78	1.59	1.23	-0.36	0.0150886	0.0755873	0.909311	0.0471349	0.153454	1	290.1	871.1	679.5	35.08	34.12	33.24	193.8	225.4	373.6	403.8	650.7	646.4	1166	1216	508	501.1	909	915.9	193.8	199.9
High	CDO99579	pep chromosome:AUK_PRJEB4211_v1:2:11217564:11220758:1 gene:GSCOC_T00029214001 transcript:CDO99579	MDQIQHKFIEVNGLKLHVAEIGENESKAVLFCHGFPEIWYSWRHQMVAVAKAGYRAIAPDYRGYGLSDPPSVPQEATYSDFISDLYSLLDVLGISKVFLIAKDFGARVAYLFVLLHPERVAGVVTLGIPFLPPVLPPLKEGLPEGFYMARWEEPGRAEADFGRLDPKTVVRNIYILFSRPDVPVAEKNQEIMDLVDSSTPLPSWFTEEDLANYGALYEKSGFQTALKVPYRSLQEVFNVPEVKVDAPALLIMGEKDYCIKFPSMGGYIRSDQAKMFVPRLETVFIPEGSHFVQEQFPGQVNELILNFLKTHS	Proline iminopeptidase; Short=PIP; AltName: Full=Prolyl aminopeptidase; Short=PAP	0	32.817	32	6	17	6	1	312	35.2	5.31	234	6	0	2.997	2.159	0.72	1.58	1.11	-0.47	0.0777409	0.317614	0.907092	0.189657	0.519852	1	682	2044.3	1472.2	38.61	30.79	25.71	957.7	975.1	485.7	478.7	2698.5	2641.2	1582.4	1511.9	1840.9	1825.1	1144.5	1187.6	957.7	864.9
High	CDP15353	pep chromosome:AUK_PRJEB4211_v1:6:4055947:4061162:1 gene:GSCOC_T00043048001 transcript:CDP15353 description:LOS2 [Source:Projected from Arabidopsis thaliana (AT2G36530) UniProtKB/TrEMBL;Acc:A0A178VT47]	MATIVSVKARQIFDSRGNPTVEVDVHVSNGVWARAAVPSGASTGIYEALELRDGGSDYLGKGVSKAVNNVNSIIGPALVGKDPTDQTGIDNFMVQQLDGTQNEWGWCKQKLGANAILAVSLAVCKAGAAVKNLPLYKHIANLAGNKKLVLPVPAFNVINGGSHAGNKLAMQEFMILPVGASSFKEAMKMGVEVYHNLKSVIKKKYGQDATNVGDEGGFAPNIQENKEGLELLKTAIAKAGYTGKVVIGMDVAASEFYGKDKTYDLNFKEENNDGSQKISGDQLKDLYKMFVAEYPIVSIEDPFDQDDWEHYAKLTCEIGEKVQIVGDDLLVTNPKRVAKAINEKTCNALLLKVNQIGSVTESIEAVRMSKKAGWGVMASHRSGETEDTFIADLSVGLAT…	Enolase; AltName: Full=2-phospho-D-glycerate hydro-lyase; AltName: Full=2-phosphoglycerate dehydratase	0	257.392	74	32	308	17	1	444	47.8	6.16	3361	32	15	2.985	3.033	1.016	1.58	1.6	0.02	1e-15	1e-15	0.945639	1.9468e-12	1.82648e-13	1	9973.1	29771.7	30250.2	5.04	1.83	1.97	9562.2	9876.3	10070.8	10761.1	29482.3	28952.1	30094.7	30063.9	30607.4	29897.1	31099	29861.3	9562.2	8760.4
High	CDP19307	pep chromosome:AUK_PRJEB4211_v1:2:28939954:28945876:-1 gene:GSCOC_T00011538001 transcript:CDP19307	MSGAGEGKMVCVTGASGYIASWLVKLLLERGYTVKGSVRDAYDPERTQHLTSLDGAKERLQLYSANLLEEGSFDAIVEGCEGVFHTASPIKLSFSNPEAELLEPAVSGTLNVLRSCANSSSVKRVVITSSMVAVSKNRELKEDVVVDESWFSDPSYCEEQKSWYELSKTMAENAAWKFAKERGIDVITIHPGLVIGPLLQPSVNSSAVLFLNLLKGVEPFPKATCSWVDVRDVAYAHVLALETPSASGRYCLVERCANASQIIKILHEHYPTHQFPDKMSNNTNLISPNYRASNEKAKRLGVQFTPLEVSLKDAVEFFREKNLVSI	Phenylacetaldehyde reductase; AltName: Full=2-phenylethanol synthase	0	30.117	24	3	10	3	1	326	35.9	6.24	238	3	0	2.978	5.737	1.926	1.57	2.52	0.95	0.00602514	8.50005e-05	0.195551	0.0219084	0.000463182	0.647351	72.7	216.4	416.9	49.56	15.28	3.93	47.4	42.1	111.4	112.2	196.3	197.3	267.3	237.4	404.4	439	407.2	426.7	47.4	37.3
High	CDP07530	pep chromosome:AUK_PRJEB4211_v1:10:2240767:2241937:-1 gene:GSCOC_T00024815001 transcript:CDP07530	MAQDMSHQNHSPEVKEPTPKIQKLDRENCSIQQAAPFFRVKRLSDNAILPSRGSPLSAGYDLSSAAETKVPARGKALIPTDLSIAVPQGTYARIAPRSGLTWKNSIDVGAGVIDADYRGPVGVILFNHSDVDFEVKPGDRIAQLIVQKIVTPEVEEVDDLDATVRGSGGFGSTGV	---NA---	0	13.343	19	2	3	2	1	175	18.7	5.92	95	2	0	2.974	4.509	1.516	1.57	2.17	0.6	0.694971	0.355058	0.96823	1	0.571744	1	41	122	184.9	57.32	104.05	86.81	70.3	71.1	23.7	23.9	497.8	501.1	22.1	29.9	489	490.5	68.9	69.9	70.3	63.1
High	CDP12591	pep chromosome:AUK_PRJEB4211_v1:9:9213862:9215478:1 gene:GSCOC_T00036257001 transcript:CDP12591	MLSLTMFPFLLLLVLFPFFTSISQPFCVAASDSIYDNFASCLTKNGIPSGQISNILYSPTNTSFNSVLQAHVRNLRFNTSSTRKPSIIVAPLEIPHVQAAVLCTKGAGLELKIRSGGHDYEGISYVSDVPFIILDMFNLSSITVDIPSESAWVQAGATVGELYYRIWEKSNAYGFPAGLCPTLGVGGHISGGGYGAMLRRFGLSVDNVLDAQIVDVKGQVLDRKAMGEDLFWAIRGGGGASFGVVLAYKLKLVQVPEIVTVFNVQRTEAENATDILVQWQNVADKIDNGLFIRVLVQPSTSESQKIIRLTFIALYLGDSDSLMSVMNAGFPALGLQKSDCKEGSWIQSMLFWSNFDIGAKPELLLNRTSDVNFLKRKSDYVQTPIPKDALTSIFNKMVQ…	Berberine bridge enzyme-like 21; Short=AtBBE-like 21; Flags: Precursor	0	5.376	6	2	4	1	1	538	59.6	7.01	27	2	0	2.972	0.785	0.264	1.57	-0.35	-1.92	0.00449948	0.901541	0.00084882	0.0170287	1	0.0120749	154.4	459	121.2	21.96	27.26	20.08	189.5	183.2	130.2	123.9	545.1	589	386.6	325.1	156.8	136	108	102.6	189.5	162.5
High	CDP10745	pep chromosome:AUK_PRJEB4211_v1:10:9504194:9506616:-1 gene:GSCOC_T00031557001 transcript:CDP10745	MEQKIDNGREEEQPIPLLTPYKMGPFQLSHRVVLAPLTRQRSYGNVPQPHAALYYSQRTTKGGFLIAEATGVSDTAQGYTDTPGIWTKEHVEAWKPIVDAVHAKGGIIFCQLWHVGRVSNYDAQPNGQAPISSTDKALTPRVQSNSTGFDLEYYSPPRRLRKEEIPNIVNDFRLAAINAIEAGFDGVEIHGAHGYLIEQFMKDEANDRTDEYGGSMENRCRFALEIVEAVSNAIGPLRVGIRLSPFTYFNDSADSNPNALGLYMAEALNKYGILYLHMVDPKLRFNPNFKRHDGSLLPMRKAFKGTFLAAGGYLREDGNEAIAENGADLIAYGRWFLSNPDLPRRFELNAPLTKYDSSTFYISDPVIGYTDYPFLETTTA	12-oxophytodienoate reductase 1; AltName: Full=12-oxophytodienoate-10,11-reductase 1; Short=AtOPR1; Short=OPDA-reductase 1; AltName: Full=FS-AT-I	0	102.566	48	13	40	13	1	380	42.5	5.99	921	13	0	2.971	10.924	3.677	1.57	3.45	1.88	0.0240004	1.04072e-05	0.0047851	0.0697166	8.80327e-05	0.0444474	767.3	2279.8	8382.5	33.64	24.81	30.38	587.6	596.4	987.2	1136.9	2909.6	2730	1762.9	1903.8	6377.3	6446.7	10899.6	11076.3	587.6	529
High	CDO99114	pep chromosome:AUK_PRJEB4211_v1:3:3288230:3291338:1 gene:GSCOC_T00026144001 transcript:CDO99114	MERRRDGIQCTKVYGLLVLLLFSFLGNLSVSALSVTVNDVECVYEYVLYEGDTVSGNFVVVDHDIFWSSDHPGIDLTVTAPGGNQVHSVRGTSGDKFDFKAPRSGMYKFCFHNPYSTPETVSFYIHVGHIPTEHDLAKDEHLDPINVKIAELREALESVTAEQKYLKARDARHRHTNESTRKRVIFYTATEYLLLALASSLQVLYIRRLFSKSVAYNRV	Transmembrane emp24 domain-containing protein p24beta3; AltName: Full=p24 family protein beta2; Short=p24beta2; AltName: Full=p24 family protein beta3; Short=p24beta3; Flags: Precursor	0	15.593	7	2	5	2	1	219	24.8	7.05	140	2	0	2.958	3.873	1.31	1.56	1.95	0.39	0.00254332	0.000289838	0.735782	0.0108439	0.00129763	1	325.8	963.5	1261.8	28.83	26.71	31.95	407.2	421.8	260.6	238.8	1192.9	1219.1	730.1	778.2	1703.1	1657.4	944.5	960.5	407.2	374.1
High	CDP00433	pep chromosome:AUK_PRJEB4211_v1:11:29187413:29193542:1 gene:GSCOC_T00032371001 transcript:CDP00433	MRISLTLLGILVALLKLQWATSHGVQPLSTIDISSAVIALDDGAYIRATPLILGLNGQNKEWITLEYGINNPSIDDWIGVFSPANFSASICLPDNPRTFPPVLCTAPIKFQYANYTNPKYKKTGKGSLKLQLINQRSDFSFALFSGGLLKPKLVAISNTITFANPNAPVYPRLAQGKQWNEMTVTWTSGYGLDEAEPFVEWGLQGEEQRSSLAVTLTFDRNTMCGAPARTVGWRDPGFIHTSFLKELWPNLVYTYKLGHRLFNGTYIWSQMYQFRASPYPGQSSLQRVVIFGDMGKDEADGSNEYNDFQPGSLNTTKQLIEDLMNIDIVFHIGDICYANGYLSQWDQFTSQIEPIASRVPYMIASGNHERDWPGSGSFYDTIDSGGECGVLAQNMFYFP…	Probable inactive purple acid phosphatase 1; Flags: Precursor	0	16.455	7	4	6	3	1	613	69	6.48	109	4	0	2.945	1.263	0.429	1.56	0.34	-1.22	1.33799e-05	0.186166	0.000259009	0.000201298	0.328884	0.00532036	29.9	87.9	37.7	18.34	9.51	20.18	22	31.6	28.2	34.4	103.7	88.4	87.5	84.3	48.6	43.2	32.6	32.9	22	28
High	CDP09731	pep chromosome:AUK_PRJEB4211_v1:1:25304141:25307660:1 gene:GSCOC_T00030179001 transcript:CDP09731	MAQTQEASKTAGKPIRCRAAVARKAGEPLVIEEITVAPPKARELRVRVLCSALCFSDIHFWRLKEPHGYYPRIFGHETVGVVESVGEGIEDVKVGDTVIPSFLAYCGECPDCTSIKSNQCSKLRFELSPYIRDGTSRFSDTKGETIYHFGYTSGFSEYTVVDITHVTKVDPAIPPSKACLLGCGVSTGVGAAWKTADIEAGTTVAIFGLGVIGLSVAEGARIRGAKTIIGVDLNPDKVEIGKKFGITHFINPKELGGKLASEVILGMTDGLGADYCFECVGLPSLSQEAFACCRKGWGKTVILGVDKPDAKFILNSLVNNHSGKTVIGVQYGGLKPNIDIAILGKRYLDKELQLDLFVTHQIKLEDINKAFKLLIEGKCLRTVIWLDRERASADGVTFD…	Alcohol dehydrogenase-like 7	0	40.143	34	9	15	2	1	401	43.4	7.31	150	9	7	2.941	3.963	1.347	1.56	1.99	0.43	0.0323692	0.00601526	0.902934	0.0900492	0.0165352	1	719.8	2117.1	2852.8	60.26	26.18	21.04	1283.7	1238.4	375.5	418.4	2760.6	2623.5	1693.5	1708.5	3418.6	3462	2380.1	2380.6	1283.7	1098.5
High	CDP18358	pep supercontig:AUK_PRJEB4211_v1:scaffold_230:91593:95695:-1 gene:GSCOC_T00013593001 transcript:CDP18358	MLPTFDPRDTEAGSRILEDISSNAGHIQEQVLEEILTKNASTDYLKSFLNGHSDKGLFKNKVPVVDYEDIKIYIDRIAVDGEPSRILTNESITELLISSGTSGGKQKWIPKTAEEGERRAFFFCLLATVQNRYLHGLNDGKALFFVLINPDIHTPGGLVLRTTTASEIKNRKDRYPEVIFCEDTNQSLYSQLLCGLVQRDAIVSIGTFFASGLQRIIKFFEEHWQEMSSNIRTGQMSDWITDPKCKRTVSLILSKQMPDLADSIDLVCQEKSWEGIIKKIWPRTKYVQAIITGSMAQYIPALEFYTGRLPVVSPAYVSSEACFGINLKPLCSPYDVSYTIIPNMAYYEFIPIGNHQDPDCTNSKDAHLKDHIVDLANVKIGQHYELVVTTCTGLYRYRM…	---NA---	0	23.477	12	5	8	3	1	582	66	6.09	253	5	2	2.922	3.425	1.172	1.55	1.78	0.23	0.506012	0.385662	0.999393	0.841681	0.612822	1	222.4	650	761.9	87.22	76.04	76.59	84	80.9	594.1	589.1	297.9	294.7	1418.2	1458.5	335.8	345.5	1685.6	1680.1	84	71.8
High	CDP17007	pep chromosome:AUK_PRJEB4211_v1:4:15633203:15639419:-1 gene:GSCOC_T00011375001 transcript:CDP17007	MAFFFRNTSLSQLRLQPQKSDPFALSRRGLHVEPGPREKALLAEDPALKQFKSHKKSVKRIKRVGDVLTIVVVAGCCYEIYVRAVMREEARKQAKESA	Succinate dehydrogenase subunit 7B, mitochondrial; Flags: Precursor	0	3.125	13	1	3	1	1	98	11.2	10.14	0	1	0	2.918	2.506	0.859	1.54	1.33	-0.22	0.012236	0.0352281	0.974218	0.0397149	0.0786452	1	255.5	745.4	640.2	37.42	35.58	37.77	165.7	193.6	337.2	360.7	525.4	555.1	1001.1	1038.4	483.4	419.7	917.8	847.9	165.7	171.7
High	CDP02154	pep chromosome:AUK_PRJEB4211_v1:7:1762758:1764603:1 gene:GSCOC_T00039457001 transcript:CDP02154	MALTAAALPFFVLVSSICIDVSSASQSHYRQIRPPQLTTNYYQKSCPRFEQIIQDTTTNKQISSPTTAAATLRLFFHDALLQGCDASVLISSTPFNKAERDADINLSLPGDGFDVVVRAKTALELACPGVVSCADILAVATRNLVTMAGGPYYPVRLGRRDGLVSKASAVQGNLPLPTMSLSEIIKIFGSRGFSVQEMVALSGAHTIGFSHCKEFSSNIYNYSSALESDPSYNPRFAAALRNACADYKKNPTLSVFNDVMSPNKFDNKYFQNLPEGLGVLSSDRMLYSDGRTRPYVELYAKDQDAFFKAFGLAMQKLSEGGVKTGGAGEIRRRCDAFNN	---NA---	0	4.817	5	1	2	1	1	339	36.9	8.27	81	1	0	2.918	2.387	0.818	1.55	1.26	-0.29	0.0249632	0.0696297	0.975717	0.0719123	0.142599	1	35.1	102.5	83.8	30.46	35.43	43.77	29.1	23.3	45.9	42.4	79.1	68	142.4	132.7	58	55	129.1	121	29.1	20.7
High	CDO98879	pep chromosome:AUK_PRJEB4211_v1:3:1458361:1459656:-1 gene:GSCOC_T00025833001 transcript:CDO98879	MAYLSIFPLCLFFLLISPSIAQTTSFRPRALVLPLTKDSATGQYITQLSQRTPLVAIRLTVDLGGQFLWVDCDRNYISSSYRPARCRSAVCNLANSKACGQCNGSPRPGCNNNTCGLSPYNPFIRTSTSGELAQDVVSLQSTDGSNPGRIVSAPRVAFTCGPTFLLEGLAKGVVGMAGLGRGPIGLPSQLASAFSFPRKFAICLGSKGVIFFGESPYNFLPGKDVSKSLIYTPLFINPVSTAGSFFQGEKSVEYFIGVKSIEVNGKPVAINSTLLKIFDKDGNGGTKISTVNPYTVMERSIYKAFTSAFAKAFSGVPRVAPVAPFEVCFNSSKLGSTRVGPPAPTIDLVLQSQSVFWRIFGANSMVQVKEDVLCLGFVDGGLNPRTSIVIGLHQIVDNL…	Probable aspartic proteinase GIP2; AltName: Full=Glucanase inhibitor protein 2; Short=NbGIP2; Flags: Precursor	0	76.884	37	13	25	13	1	431	46.2	9.23	599	13	0	2.894	1.637	0.566	1.53	0.71	-0.82	0.0484605	0.611227	0.484352	0.126805	0.871229	1	1117.7	3234.3	1830	47.5	49.97	51.22	1740.9	1721.5	725.6	718.5	5321.7	5044.1	2073.8	2038.4	2916.6	3008.6	1148.2	1137	1740.9	1527
High	CDP08932	pep chromosome:AUK_PRJEB4211_v1:1:30294690:30298306:-1 gene:GSCOC_T00028069001 transcript:CDP08932	MRTSSQLIGLLNFLTFLASIPILGGGIWLSSRANNTDCLKFLQWPLIVIGVAIMVVSLAGIAGSCYGNTFLMYLYLWAMFVIIATLIGFVIFAYAVTDKGTGRPVSNKVYQEYYLQDYSGWLEERVTSQSYWPKISSCIRDSHVCGKLRRDFGGIPESADMFSMRKLSPIESGCCKPPTGCGYVYQNETVWIPGSGTVGTDLDCGRWNNDQGTLCYNCDSCKAGVLGSLKKSWRRVSVINIVILIILVIVYVVACAAFRHDKRMDNDEPYGETRMEKVQPTRIHF	Tetraspanin-3	0	7.33	7	2	2	2	1	285	31.8	8.21	69	2	0	2.89	1.578	0.546	1.53	0.66	-0.87	0.169017	0.802189	0.690693	0.354934	1	1	104.1	301	164.3	48.17	62.47	65.48	64.9	67.9	162.9	159.8	173.1	150.7	523.6	558.6	88.1	88.2	329.1	306.2	64.9	60.2
High	CDP19933	pep supercontig:AUK_PRJEB4211_v1:scaffold_793:18064:21235:-1 gene:GSCOC_T00013299001 transcript:CDP19933	MASFSRCQILLTFLVILGLWSPHLVSCVNNNPLIQSECLMVPTSEFVGSLKSTIGIVRQVTSIVSRFTSFLGDFRLSNAISDCLDLLDLSADELDWTLSAGQKPSGKNNTNTVRLSSDLRTWLSAALVNQDTCMEGFEGTNGIVKSLVAGSLNQITSLVTDVLGMVHPIPDSKSNGGSGGGGGGRTGGRKLTSRKEFEFPSWLKSKDRKLLQANGVQADVVVAQDGTGKFTSVNDAISAAPEQSAKRFVIYIKKGVYKEYIEISKKKPNIMLIGDGMDVTVISGNRSFIDGWTTYRSATFGVKGQGFIARDMTFENTAGPQKHQAVAFRSDSDLSVVYRCAIRGFQDTLYAHSMRQFYGECVVTGTVDFIFGDGSVVFQRCTLNARKGLPNQKNTITAQ…	---NA---	0	7.715	4	2	3	1	1	532	57.8	8.75	60	2	0	2.887	2.582	0.894	1.53	1.37	-0.16	0.0290937	0.0611999	0.994227	0.0822009	0.12697	1	105.4	304.4	272.2	17.06	39.16	51.03	102.8	89.2	108.2	133.4	224.8	202.5	447.5	412.3	175.6	158.5	439.3	422	102.8	79.1
High	CDP15150	pep chromosome:AUK_PRJEB4211_v1:3:9527861:9528997:1 gene:GSCOC_T00042747001 transcript:CDP15150	SICTTFLILLKISLQYINFPSAKMGSKTLLFFFISMAVVLMITSEVAAKSVDNSKTVETNEEGEAKYHGGGYGGGHGGGYGGGHGGHGGGYGGGHGGGHGGHHGGGYGGHPGEGNGDGHGGYGGGGHGGYGHGGGSHGGYGHGGHGGGGHGGHPGEAADAKPQN	---NA---	0	11.174	7	1	6	1	1	164	15.8	7.14	180	1	0	2.886	8.945	3.099	1.53	3.16	1.63	0.0760454	0.000236235	0.0531211	0.186033	0.00108929	0.255002	68.3	197.1	610.7	15.84	21.7	73.99	55.6	62	75.2	78.2	148.5	178.5	217.5	246.1	289.3	275.9	1289.3	1291.6	55.6	55
High	CDP03485	pep chromosome:AUK_PRJEB4211_v1:3:19034690:19042540:-1 gene:GSCOC_T00015291001 transcript:CDP03485	MAASSFPRSATAGKGSLGVWPGMAQLSIRKNLVYGLMRLFSMPFKTLRGVSSRTLGVSRFCSINNMSSTLQIELIPCLRDNYAYLIHDTDTGTVGVVDPSEAVPVIDALDRNNRNLTYILNTHHHYDHTGGNMELKERYGAKVIGSGVDQDRIPGIDIALNDGDNWKFASHEVLIMDTPGHTRGHISFYFPGSKSIFTGDTLFSLSCGKLFEGTPDEMLSSLRKIMSLPDDTSIYCGHEYTLSNSKFALSIEPGNKELQSYAAEVNHLRDKGMPTIPTTLGKEKLCNPFLRTSSMEIRRSLKIPPAANDAEALGIIRQAKDNF	Probable hydroxyacylglutathione hydrolase 2, chloroplastic; AltName: Full=Glyoxalase 2-4; AltName: Full=Glyoxalase II; Short=Glx II; Flags: Precursor	0	13.962	19	2	6	2	1	323	35.6	7.55	170	2	0	2.876	2.85	0.991	1.52	1.51	-0.01	0.000310078	0.000268946	0.999987	0.00217928	0.00122522	1	126.4	363.6	360.3	9.57	10.2	15.07	135.1	142	117.5	118.3	368	396	308.4	359.3	426	395.4	309.6	328.3	135.1	126
High	CDP03972	pep chromosome:AUK_PRJEB4211_v1:1:33775961:33779767:-1 gene:GSCOC_T00016489001 transcript:CDP03972	MASMPLRIASNSVSSLLNLTFDGPCRLASNSGFYGLPDQPLNNIPLSTSASANRRTRRFLSQVPLHATNAPNRETIKSQSSLSFDVVIIGAGIIGLTIARQFLLFSDLSVAILDAAVPCAGATGAGQGYIWRINKTPGAEKWELASRSHQLWVNLAESLQHQGLNPLQILGWMKTGSLLVGKTKEESTLLKAKVKQLCDAGLEAVFLSNQDLLLKEPALVLGKEGTAAYLPDDCQLDARCAVAFLEKENRHFASEGRYAEFYHEPATYLLRSGSSGEVDAVQTSKNTIFSKKAVVMAAGCWTGTLMHELIKSTNIKLDIPVKPRKGHLLVVENFNSFKLNHGLMEAGYVNHQSASLPSTASHKRPLYDAQATSVSMTATMDTSGNLVLGSSRQLLGFNV…	---NA---	0	6.014	3	1	2	1	1	502	54.4	8.25	75	1	0	2.866	2.462	0.859	1.52	1.3	-0.22	0.000880791	0.00653299	0.804631	0.00487969	0.0178243	1	21.9	62.8	53.9	15.05	25.14	17.82	23.3	26.4	20.6	18.7	54.2	50.6	72.8	86	49.8	40.1	60.6	58.4	23.3	23.4
High	CDP17067	pep chromosome:AUK_PRJEB4211_v1:1:37781215:37785251:1 gene:GSCOC_T00004978001 transcript:CDP17067	MARSPCCSTRCLLVLFLISAVPIGYVIRLETAGKAGRHVYEYQSVGWLRECSKWDDVNSRFIVSLFEGGMGVVPILAEHHHPKASALEEIQVVKDADLAGNATLGFTIDRPRNRVVVCIADILGNRYSALAAYDITTWNRLFLTKLSGPEDEKAFADDVAVDEEGNSYVTDPKGGKIWKVGATGQFLGTIRNPLFTPHGWQNQIVGINGIIYHPNGYFLVVHTMAGQLYKVATNAVAGKEAGPVVRLVKLVEGGSLKFGDGLELLSPTKLIVAGNPTRLVETTDDWDTARVSGVTKGATHRIVTAATVKDGRVYLNHILGLGYPKRKHILMEAVF	---NA---	0	28.008	15	4	9	4	1	335	36.5	8.29	205	4	0	2.865	3.616	1.262	1.52	1.85	0.34	0.0728482	0.0222594	0.967522	0.179702	0.0523974	1	542.3	1553.6	1961	7.03	2.31	7.33	512.3	522.4	562.9	596	1547.4	1545	1622.1	1559.8	1875.7	1841.4	2147.6	2050.2	512.3	463.4
High	CDP02599	pep chromosome:AUK_PRJEB4211_v1:7:5195845:5199894:1 gene:GSCOC_T00040037001 transcript:CDP02599	MSKGPGLFSDIGKKAKDLLTKDYISDQKLSVSTYSYSGVALTSTAVKKGGLSTGDVAAQYKYKNTLFDVKVDTESNVSTTLTVTDIVPSTKTIASLKYPDYSSGKVEIHYFHQHATLTTAVGLKQSPAVDLSVTLGTPTFALGAEAGYETASGTLTKYTAGISVTKPESSASIILGDKGDTIKASYVHHLDQLKRSTAVAEITRRFSTNENTFTVGGSYAVDALTIVKMRLNNHGSLGTLLQHEVIPKSVLTISSEFDTKALDKTPRFGVALALKP	PUTATIVE PSEUDOGENE: Putative mitochondrial outer membrane protein porin 5; AltName: Full=Voltage-dependent anion-selective channel protein 5; Short=AtVDAC5; Short=VDAC-5	0	41.913	36	7	20	7	1	276	29.4	9.1	382	7	0	2.865	2.465	0.86	1.52	1.3	-0.22	0.334207	0.48166	0.998378	0.61777	0.734019	1	1011.8	2899.1	2494.2	66.76	80.07	65.43	1936.8	1997.2	528.6	523.8	7173.3	6622.1	1244.4	1269.2	4890.6	4685.3	1327.8	1324.8	1936.8	1771.5
High	CDP01639	pep chromosome:AUK_PRJEB4211_v1:7:10025909:10029351:1 gene:GSCOC_T00036754001 transcript:CDP01639	MAAKFTCIRVITAAILLILLPATTFSDLSSDRAALLALRSALGGRSALWNVSEPNICLWAGVTCSSNHSTVIELHLPAVGLSGSVPPNTVSNLTNLQTLSMRFNSLSGPLPSDLSRLSDLRNLYLQHNFFSGPIPGSLSSLANLVRLNLADNNFSGPIPTSFENLTRLATLYLEKNNLSGPIPDLNLPGLVQFNVSNNQLTGPIPKGIAEKNPKSAFEGNPLCGQPLNDLCDNGVGHSTKKKGKSLSGGAIAGIVIGCVVGLLLIVLILLFLCRKRREKGGVRSKVEGGTKQSDVEMAREKPGEGVEKDGVGGGFAAMSAKMKEKEKGEGNIAGGKSLVFFGKVGRGFDLEDLLKASAEVLGKGTFGTAYKAALETGITVAVKRLRDVSVSEKEFREKI…	Probable inactive receptor kinase RLK902; AltName: Full=Receptor-like kinase 902; Flags: Precursor	0	16.548	7	3	6	3	1	645	69.5	7.69	88	3	0	2.836	1.853	0.654	1.5	0.89	-0.61	0.442276	0.83645	0.949644	0.759279	1	1	121.8	345.5	225.8	68.76	83.21	72.74	229.6	242.4	55.5	64.6	888.3	826.3	144.4	135.6	474.6	464.1	103.4	109.9	229.6	215
High	CDO98334	pep chromosome:AUK_PRJEB4211_v1:4:4689850:4703684:1 gene:GSCOC_T00022397001 transcript:CDO98334	MASGSQKIVSFLGLDEVGLELAASLLRSGYDVRAFETFSPLMDEFCKLGGKRCGNTTEMSKGLSALVILTCHSDHINEKILEQKGILKGHAGGHHTDSIVDMFVSRAVSDDLNGKVMIISSGSSETTHRAQPILSAMCEKLYIFEGELGGGSKTKMVIELLEGAHFVASIEAISLGAQAGIHPWILYDIISNAAGNSWVFKNYLPQLLRGNQTKHHFLNALIQNVGTVLDMSKSLVFPLPLLTVAYQQLIAGSLHGRKDDEDATLLKVWENVLGVNITDAANSKSYNPEELAHQISAKSENVKRIGFIGLGAMGFGMATHLLKSDFSVTGYDVYKPTLSRFADAGGLIGSSPAEVSQDVDVLVIMVTNEAQAESVLYGDSGAVPALPSGASLILMSTVS…	Probable 3-hydroxyisobutyrate dehydrogenase-like 1, mitochondrial; Short=HIBADH-like; Flags: Precursor	0	5.443	3	2	2	2	1	737	79.4	6.47	45	2	0	2.812	3.189	1.134	1.49	1.67	0.18	0.0179012	0.00728946	0.987928	0.0544363	0.0196975	1	95.2	267.9	303.7	26.7	46.79	37.67	65.7	81.3	119.2	111.6	181.9	162.5	394.5	416.2	220.2	212.1	431.2	418.9	65.7	72.1
High	P45582	Beta-galactosidase OS=Asparagus officinalis OX=4686 PE=2 SV=1	MALKLVLMLMVALLAAVWSPPAVTASVTYDHKSVIINGQRRILISGSIHYPRSTPEMWPDLIQKAKDGGLDVIQTYVFWNGHEPSPGQYYFGGRYDLVRFLKLVKQAGLYAHLRIGPYVCAEWNFGGFPVWLKYVPGIHFRTDNGPFKAAMGKFTEKIVSMMKAEGLYETQGGPIILSQIENEYGPVEYYDGAAGKSYTNWAAKMAVGLNTGVPWVMCKQDDAPDPVINTCNGFYCDYFSPNKDNKPKMWTEAWTGWFTGFGGAVPQRPAEDMAFAVARFIQKGGSFINYYMYHGGTNFGRTAGGPFISTSYDYDAPIDEYGLLRQPKWGHLRDLHKAIKLCEPALVSGEPTITSLGQNQESYVYRSKSSCAAFLANFNSRYYATVTFNGMHYNLPPWS…	Beta-galactosidase; Short=Lactase; Flags: Precursor	0	12.442	3	2	6	2	1	832	92.2	7.43	82	2	0	2.811	0.358	0.127	1.49	-1.48	-2.97	0.00117305	0.00107881	1.15306e-06	0.00577274	0.00380828	0.000104702	222.7	626	79.6	37.08	7.72	8.71	147.2	165	305.5	300.4	647	549.4	651.5	605.7	79	66.6	80.3	80.5	147.2	146.4
High	CDP03348	pep chromosome:AUK_PRJEB4211_v1:6:7735157:7740226:-1 gene:GSCOC_T00041899001 transcript:CDP03348	MAVQSNGNGSLDSRVKVPVPQIKFTKLFINGEFVDSVSGKTFQTIDPRNREVIAEIAEGNKEDVDLAVKAAREAFDNGPWPRLPGFERRKIMMKFADLIDENNEELATLETIDAGKLFFLCKIMEIPGAAETIRYYAGAADKIHGETLKMSTALQGYTLHEPVGVVGHIIPWNFPSQMFAMKVGPALAAGCTMVVKPAEQTPLSALYYAHLAKLAGIPDGVLNVVTGFGQTAGAAISSHTDIDMVSFTGSTEVGRLVMQAAATSNLKPVCLELGGKSPILIFDDADVDKVTELALQGTLFNKGEICVAGSRVFVQEGIYDKFLLKLKEKVKNWVVGDPFDPTSHQGPQVNKKQYDRILSYIELGKKEGATLFHGGKPGDRKGYYIEPTIFTDVTDEMTI…	---NA---	0	93.384	35	12	35	11	1	505	55.1	6.48	459	12	1	2.807	6.582	2.345	1.49	2.72	1.23	0.000605249	4.81001e-07	0.00309002	0.00363953	6.83589e-06	0.0321786	573.2	1609.1	3772.7	16.95	27.07	33.85	625.9	676.9	461.9	524.9	2018.9	2013.5	1217.4	1286	5090.5	5131.5	2791.7	2796	625.9	600.4
High	CDP18990	pep chromosome:AUK_PRJEB4211_v1:11:31563878:31568471:-1 gene:GSCOC_T00001037001 transcript:CDP18990	MASISKLSTPPTASHFSTSSSSQPSPTIRSLCLFLPNNTNTNALCLSSSNLSIRPTRPIIAPSLLVRCSQIDGNGSHVKGTTLHDLYEKQGQSPWYDNLCRPVTDLLPLIESGVRGVTSNPAIFQKAISTSNAYNEQFRELVQAGKDIESAYWELVVKDIQDACKLFEPIYDETDGGDGYVSVEVSPGLADDTQGTIEAAKWLHKKVQRPNVYIKIPATAPCIPSIKEVIASGISVNVTLIFSLARYEAVIDAYLDGLEASGLSDLSRVTSVASFFVSRVDTLVDKMLEKIGTPEALDLRGKAANAQAALAYQVYQKKFSGPRWEALVKKGAKKQRLLWASTSVKNPAYPDTLYVAPLIGPDTVSTMPDQALQAFIDHGTVGRTIDANVSEAEGIYSAL…	---NA---	0	200.818	66	23	143	23	1	444	48.1	5.52	2198	23	0	2.805	2.75	0.98	1.49	1.46	-0.03	0.0011588	0.00162023	0.999752	0.00571707	0.00536251	1	4954	13894.7	13623	24.93	36	35.94	6181.2	6141.9	3951	3995.9	20085.1	18714.1	10316.4	10120.4	18714.4	18727.9	9916.8	9750.3	6181.2	5447.9
High	CDP20822	pep supercontig:AUK_PRJEB4211_v1:scaffold_1827:378:2201:-1 gene:GSCOC_T00010625001 transcript:CDP20822	MKETLLPFFLSFLLFTSSPSSAARPASNAVRDIDGKEVIVGAHYYILPVIRGRGGGLTLGSADNETCPLDVIQEQFEVKRGLPLTFTPVNTTKGVVPVSTDLNIKFFAATICVQSTVWKLEFDADISQYVIVSGGIEGNPGRETISNWFKIEKYDQDYKLVYCPTVCNFCKVICRDVGIFVQNGRRRLALSDVPFRVVVKKAEY	Kunitz trypsin inhibitor 5; Short=AtKTI5; AltName: Full=Kunitz trypsin inhibitor 2; Short=AtKTI2; Flags: Precursor	0	12.796	18	4	4	4	1	204	22.6	7.97	62	4	0	2.804	0.767	0.274	1.49	-0.38	-1.87	0.735942	0.997223	0.545059	1	1	1	298.1	835.8	228.6	83.34	104.59	89.17	738.4	742.3	120.3	119	3601	3613.7	194	162.8	649.6	624.5	83.7	80.4	738.4	658.4
High	CDP10282	pep chromosome:AUK_PRJEB4211_v1:3:12058635:12062822:-1 gene:GSCOC_T00030959001 transcript:CDP10282	MAAGVRRIKLGPQGLEVSAQGLGCMGMSFSYGLPKPELDMTKLIHHAINSGITHLDTSDVYGPHTNEILIGKALKGVEREKVQIATKFAARMLPSGEHVACGHPDYVREACEASLKRLDVDYIDLYYVHRIDTTIPIEITVGALKQLVEEGKVRHIGLSEASPETIRRAHAVHPITAVQLEWSLWTRDAEEVVIPTCRELGIGIVPFSPLGRGFFASGAKLTENLTSNDFRKSFPRFQKENVEHNNKLFEQVTQLATRKGCTPSQLALAWVHHQGDDVCPIPGTTKIENLESNIKALSVKLTPEEMAELESIASANAAKGDRYPPAMMAHTWRFANTPPLSSWKAT	Probable aldo-keto reductase 2	0	59.3	40	12	30	2	1	346	38.1	7.18	318	12	0	2.802	3.231	1.153	1.49	1.69	0.21	0.632574	0.517505	0.99963	0.982681	0.777456	1	102.8	288.2	332.3	30.45	85.98	87.93	131.6	134.6	80.4	75	776.3	722.8	105.8	114.9	887.5	917	124.4	120.2	131.6	119.4
High	CDP04982	pep chromosome:AUK_PRJEB4211_v1:2:569234:572303:1 gene:GSCOC_T00019870001 transcript:CDP04982 description:Flavone 3'-O-methyltransferase 1 [Source:Projected from Arabidopsis thaliana (AT5G54160) UniProtKB/Swiss-Prot;Acc:Q9FK25]	MAEEEACLFAMSLASASVLPMVLKSAIELDLLELIAKAGPGAYVSPSELAAQLPTHNPEAPIMLDRILRLLATYSVLDCKLNNLADGGVERLYGLAPVCKFLTKNADGVSMAPLLLMNQDKVLMESWYHLKDAVLDGGIPFNKAYGMTAFEYHGTDPRFNKVFNQGMSNHSTITMKKILEVYRGFEGLKTVVDVGGGTGATLNMIISKYPTIKGINFELPHVVEDAPSHSGVEHVGGDMFVSVPKGDAIFMKWICHDWSDDHCRKLLKNCYQALPDNGKVILAECVLPEAPDTSLATQNVVHVDVVMLAHNPGGKERTEKEFEALAKGAGFKEFRKVCSAVNTWIMELCK	Caffeic acid 3-O-methyltransferase; Short=CAOMT; AltName: Full=S-adenosysl-L-methionine:caffeic acid 3-O-methyltransferase	0	13.104	21	4	9	4	1	350	38.2	6.05	38	4	0	2.792	1.269	0.455	1.48	0.34	-1.14	0.63729	0.998656	0.788023	0.989085	1	1	165.4	462	210	81.44	83.92	80	418.3	384.8	68.6	71.1	1169.7	1100.7	167	193.9	478.8	474.4	93	80.2	418.3	341.3
High	CDP06438	pep chromosome:AUK_PRJEB4211_v1:6:777756:780167:1 gene:GSCOC_T00023292001 transcript:CDP06438	MLLQAPISSPTYSLQRAGATANPLLLSNNSATTGTATSNFLSSSSLSADSAGGRPTSVVLQTNRRKGFRTFASDEKTSTLSLTGVVFQPFEEIKNDEFLVPLSPSVSLARQRFSHECEAAINEQINAEYCVSYAYHAMYAYFDRDNIALKGLAKFFKESSEEEREHAEKLMKYQNIRGGRVTLLPLKEPKSEFDHVEKGDALYAMEVALCLEKLINAKLLEVHSVADRNNDPQMQDFIESEFLGEQVEAIKKISDYVTQLRMVGKGHGVWHFNQKLLHHEGEGGDGVF	Ferritin-1, chloroplastic; AltName: Full=SFerH-1; AltName: Full=SOF-35; Flags: Precursor	0	49.913	31	8	25	8	1	288	32	5.96	320	8	0	2.79	1.467	0.526	1.48	0.55	-0.93	0.0534545	0.775317	0.360287	0.138164	1	0.955128	613.5	1711.5	900	40.04	27.7	35.03	868.6	876.4	433.3	413.5	2183.3	2186.4	1337.2	1341.6	1248.2	1211	646.9	668.8	868.6	777.4
High	CDP17099	pep chromosome:AUK_PRJEB4211_v1:1:37505250:37509340:1 gene:GSCOC_T00005018001 transcript:CDP17099	MGEEKRLVKRLAVLLLLLAFCDATKHIGTQYDGECQFIRPLKPRPHSVSVLEFGAVGDGKTSNTVAFQNAIFYLKSFADKGGAQLYVPRGRWLTGCINLTSHLTLFLEREAVILGSQDYTHWDIVDPLPSYGRAIEVSGGRYRSLISGNNLTDVVITGNNGTIDGQGSIWWEKFNSHLLNYSRPHLVEFVGSNDVVISNLTFLNAPAWNIRPAYCSNVLVQNITVHSPPESPYTSGIVPDSSEHVCIENSNISMGYDAITLKSGWDEYGIAYGKPTTNVHIRGIRLQSGTGSGVAFGSEMSGGISNILVEHLDIHNSFVGIELKTSIGRGGYIKYILISDVIMENVQIGLKATGQCDSHPDDKFDPLALPTISAITFEDIRGTNITVAGSFTGINESPF…	Probable polygalacturonase; Short=PG; AltName: Full=Pectinase	0	12.546	11	2	4	2	1	462	50.1	5.63	48	2	0	2.79	0.661	0.237	1.48	-0.6	-2.08	0.0233958	0.605664	0.00142131	0.0683049	0.866008	0.017981	261.5	729.6	172.8	18.34	4.89	11	317.3	302.5	226.1	225	773.4	727.1	732.2	686.1	194.3	186.2	160.3	155.3	317.3	268.3
High	CDO98114	pep chromosome:AUK_PRJEB4211_v1:4:2999434:3003559:1 gene:GSCOC_T00022111001 transcript:CDO98114	MWRRLVSLQLKTLSIPRSVPKPHRFTAAGAVSSSPESFRPSVTLFSCQFSTESANVATKKTVEDVMPIATGHEREELEAELEGKDILAINYPVGPFGTKEAPAVIQSVYNKRIVGCPGGEGEDEHDVVWFWLEKDKAHECPVCSQYFVLEVVGHGGDPEGHSDDEHH	---NA---	0	16.358	35	4	9	4	1	167	18.4	5.36	148	4	0	2.779	3	1.08	1.47	1.59	0.11	0.0118747	0.00716923	0.998873	0.038762	0.0193939	1	491.4	1365.5	1474.2	18.96	16.31	9.44	392.1	428.2	573.4	563.9	1219.6	1144.1	1528.9	1596.7	1383.7	1307.8	1570.8	1586	392.1	379.8
High	CDP04189	pep chromosome:AUK_PRJEB4211_v1:9:3204629:3213498:-1 gene:GSCOC_T00017502001 transcript:CDP04189	MAPDLRRNGSVVALALLVSLVVNGVIFDVEGNNNVVFEVEHKFKGRRNENGGRGSFLTSLKAHDSHRHGRMLAALDMPLGGNGSPTDAALYFTKLSIGTPPQDYYVQVDTGSDILWVNCAGCVRCPKKSSLGIDLTLYDMKASSTGRLVTCDQDFCLSAFNAPASDCKVGNPCAYSVTYGDGSSTGGYFVRDYAKLNQLTGNLQTIPMNGSIVFGCSSQQSGELGSSTEAVDGIIGFGQANSSIISQLASAGKVKKIFSHCLDGINGGGIFAIGQVVQPKLKTTPLVPNEAHYNVVLNAIEVGGDVLNLPSDVLGGGSGSGTIIDSGTTLAYLPDDVYTPLMEKITASQSNLKIHIVENQFKCFVYSGNVDDGFPVVTFHFEDSLSLTVYPHEYLFDLH…	Aspartic proteinase 36; Flags: Precursor	0	10.534	8	3	4	3	1	500	53.5	5.91	52	3	0	2.772	1.986	0.716	1.47	0.99	-0.48	0.00455657	0.0565581	0.662081	0.017198	0.119323	1	255.6	708.6	507.6	30.6	21.39	25.74	328	323.8	201.8	178.5	836.8	840.8	600.1	556.1	612.5	656.2	390.5	420.7	328	287.2
High	CDP00673	pep chromosome:AUK_PRJEB4211_v1:11:27060409:27063184:1 gene:GSCOC_T00032696001 transcript:CDP00673	MEPPPLSAPPIATGAPPAPPQTTTVTSYADSVESSPRSRNTDSWDEPPYGPTATTNTNTTAAHPTSAATAAAKLRLMCSYGGHIVPRPHDKSLCYVGGDTRIILVDRQTTLSDLCLRLSKTLLSGKSFSLKYQLPNEDLDSLISVTTDEDLENMVDEYDRLNSSANPASKTSRLRLFIFSCNLDSETSSSIESLLENSSKSSEWFLNALNWNTTASCKVRGFSETSSINCLLGLDDAAASVENHSAVKDVSDAQLDASNVTNNGNVGQDVHSVPDSPMLETSSSFGSTSSSPSMANLPPIKVHSEEGINQKGMVGLGIEEQFSQLNVGVGLNNVQKQEEGGFVPPAVAAPGTVLSGLPVMVGGEYPNRVISDDERSEQGVPVGFRKAPQVQQYQQQVPQ…	---NA---	0	8.02	5	1	3	1	1	710	76.5	5.63	91	1	0	2.768	1.501	0.542	1.47	0.59	-0.88	0.000842892	0.281062	0.0208341	0.00475911	0.470863	0.132854	21.4	59.4	32.2	25.4	14.88	20.07	17.4	19.5	23.6	30.5	55.5	50.9	63.5	71.2	30.9	24.1	39.6	33.6	17.4	17.3
High	CDO99196	pep chromosome:AUK_PRJEB4211_v1:3:4214577:4216327:1 gene:GSCOC_T00026260001 transcript:CDO99196	MCTLEKRGNIFLLTLTGDDEHRLNPTLIASIRSALAAVKSQATKGSVLITSGQGKFFSNGFDLRYAQAAGSVQGAKDRLMNMVEIFKPLVADLISLPMPTIAAITGHAAAAGLMLAVSHDYITMRSDKGVLYMSELDIGMTLPDYFNAIFRSKIGSPSARRALLLRASKVRAEEAAGMGIIDSVHSNGMETLEAAVRLGEDLSKKKWEGKVYAEIRKSLYPELCGILGLKDEKVLPSRL	---NA---	0	5.908	7	1	2	1	1	239	25.8	9.1	0	1	0	2.748	6.242	2.271	1.46	2.64	1.18	0.00756963	2.59816e-05	0.0342171	0.0267548	0.000171221	0.187087	49.2	135.1	306.9	15.93	28.63	35.03	49	64.1	45.5	49.3	189.9	164.5	110.9	106.4	421.3	418.6	225	223.9	49	56.9
High	CDP21422	pep supercontig:AUK_PRJEB4211_v1:scaffold_4017:806:3337:1 gene:GSCOC_T00004619001 transcript:CDP21422	MEKMSKSTFSSCTTLLLLISVICSISFPHVHASSSSPSKPTSSDALCDMTPYSTFCKSQFPQNKSTNIHDHGRLSIQKSLSTSTVLLSAINRHLSSKSSLLSQTAVFALQDCQDLVTTNVDLLSNILQTIKNSDALQGSQYEDSNTWLSATITCLQTCLDGLKAVLSASPVASELSPSLTDGSMLSGVSLALLKYGWKPSTGKSRLLGDVNITKTVVVNPDGSGNYITINDAILAAPNNTKAGKGYYLIRVVAGVYQEYISIASNKKYLMMVGDGINKTIITGNHSVDDGWTTFDSPTFAVTAQGFVAMNITFRNTAGAIKHQAVALRSGADLSTFYKCSFEGYQDTLYTHSMRQFYRECDIYGTVDYIFGNAAVVLQMCNIYSRLPVQGQFNTITAQG…	Probable pectinesterase/pectinesterase inhibitor 7; Includes: Pectinesterase inhibitor 7; AltName: Full=Pectin methylesterase inhibitor 7; Includes: Pectinesterase 7; Short=PE 7; AltName: Full=Pectin methylesterase 1; Short=AtPME1; AltName: Full=Pectin methylesterase 7; Flags: Precursor	0	7.953	6	2	3	2	1	532	57.6	7.8	43	2	0	2.739	3.715	1.356	1.45	1.89	0.44	0.130111	0.0374057	0.956132	0.28942	0.0824431	1	110	301.4	408.8	63.19	50.45	54.28	48.6	65.5	184.9	200.7	191.4	190.8	498.9	474.5	238.4	250.7	666.5	689	48.6	58.1
High	CDP02681	pep chromosome:AUK_PRJEB4211_v1:7:5809124:5813003:-1 gene:GSCOC_T00040148001 transcript:CDP02681 description:Heat shock 70 kDa protein 9, mitochondrial [Source:Projected from Arabidopsis thaliana (AT4G37910) UniProtKB/Swiss-Prot;Acc:Q8GUM2]	MATSILLRSALRRPELHTSALAASRSLVGNVRASPATSPLSRMLTSLRYFSSRPLADDVIGIDLGTTNSCVALMEGKTARVIENAEGTRTTPSVVAFSQKGDLLVGATAKRQAVTNPQNTLFATKRYIGRRFDDPQTQKELKMVPYKIVRAPNGDAWVEANGQTYSPSQVGAFILTKMKETAESYLNKSVNRAVITVPAYFNDAQRQATKDAGRIAGLTVERIINEPTAAALSYGVNNKEGTIAVFDLGGGTFDISILEISNGVFEVKATNGDTFLGGEDFDNTMLEFLVSEFKKAERIDLSKDKLALQRLREAAEKAKIELSSTSQTEINLPFITADASGAKHFNVTLTRSKFETLVYHLIERTKAPCISCLKDAGVSTTDIDEILLVGGMTRVPKVQ…	---NA---	0	36.999	16	8	20	6	1	681	73.5	5.76	188	8	0	2.735	5.299	1.938	1.45	2.41	0.95	0.0516761	0.000742661	0.225987	0.133995	0.00281077	0.715907	118.3	323.6	627.1	29.76	33.22	51	101.2	100.3	138.4	182.5	427.2	438.5	245.2	234.2	1052	976.5	386.2	402.7	101.2	89
High	CDP03213	pep chromosome:AUK_PRJEB4211_v1:6:8871704:8875454:1 gene:GSCOC_T00041720001 transcript:CDP03213	MVNIRRTLHEIPELGFEEFETSKLVRTELDKMGIPYKHPVAITGVVGYIGTGKPPFVAIRADMDALAMQENVEWEHKSKIPGKMHACGHDAHVAMLLGAARILQEYRNHLQGTVILVFQPAEEGGGGAKKMLDTGILENVDAIFGLHVSSKYPIGTVAARPGPILAANGFFDAVIKGKGGHAAIPQTSIDPILAASNIIISLQHLISREADPLDSQVVTVGKFQGGAAFNVIPDSVAIGGTFRAFSKDSFRQLKQRIEEAGSSFGA	IAA-amino acid hydrolase ILR1-like 1; Flags: Precursor	0	12.84	12	2	6	1	1	266	28.5	7.08	135	2	0	2.728	5.187	1.902	1.45	2.37	0.93	0.000413679	7.5548e-07	0.00306491	0.00273642	1.00693e-05	0.0319857	60	163.5	311	21.35	24.39	19.33	53.7	58.4	61.6	84.7	143.9	108.5	189.1	185.9	253.5	268.6	369.9	360.1	53.7	51.8
High	CDP09786	pep chromosome:AUK_PRJEB4211_v1:8:29244971:29245648:1 gene:GSCOC_T00030252001 transcript:CDP09786	MKTFNSFSISTLLIIAFLSASAHAATFDIRNNCPYTVWAAAKPGGGRRLDRGQTWTINVAAGTAGARIWARTNCNFDGNGRGSCQTGDCGGVLQCTAYGRPPNTLAEYALNQFNNLDFFDISLVDGFNVPMDFSPTSNGCTRGIRCTADINGQCPSVLKAPGGCNNPCTVFKTDQYCCNSGSCSATDYSRFFKTRCPDAYSYPKDDQTSTFTCRGGTNYRVVFCP	Thaumatin-like protein; AltName: Allergen=Act c 2; Flags: Precursor	0	9.134	14	2	3	2	1	225	24.3	8.07	64	2	0	2.725	0.792	0.291	1.45	-0.34	-1.78	0.0706755	0.964091	0.0234925	0.175052	1	0.142374	89.4	243.7	70.9	45.86	62.71	34.34	135.8	132.8	60.2	55.8	462.4	422.2	140.7	123.2	96.1	96.7	52.2	52.2	135.8	117.8
High	CDP02294	pep chromosome:AUK_PRJEB4211_v1:7:2755800:2759303:1 gene:GSCOC_T00039649001 transcript:CDP02294	MVKICCIGAGYVGGPTMAVIALKCPSIEVAVVDISAPRINAWNSDQLPIYEPGLEEVVKECRGRNLFFSTAVEKHVCEADIVFVSVNTPTKTRGLGAGKAADLTYWESAARMIADVSKSDKIVVEKSTVPVKTAEAIEKILTHNSKGINFQILSNPEFLAEGTAIQDLFKPDRVLIGGRETPGGQKAIQVLKDVYAQWVPEDCIITTNLWSAELSKLAANAFLAQRISSVNAMSALCEATGADVTQVSYAVGKDTRIGPKFLNASVGFGGSCFQKDILNLVYICECNGLPEVAEYWKQVIKINDYQKNRFVNRLVSSMFNTVANKKIAVLGFAFKKDTGDTRETPAIDVCKGLLGDKARVSIYDPQVTEDQIQRDLNMNKFDWDHPLHLQPMSPTTVKQ…	UDP-glucose 6-dehydrogenase 1; Short=UDP-Glc dehydrogenase 1; Short=UDP-GlcDH 1; Short=UDPGDH 1; AltName: Full=Gm-UGD1	0	75.933	37	14	26	14	1	480	53	6.04	584	14	0	2.721	3.461	1.272	1.44	1.79	0.35	5.37257e-06	3.39569e-07	0.319756	0.0001157	5.18447e-06	0.886826	897.7	2442.3	3107	19.5	4.84	11.39	726.7	782.2	1030.3	1080.7	2602.4	2460.8	2315.3	2424	3505.9	3386.2	2850.8	2814.9	726.7	693.8
High	CDP18705	pep supercontig:AUK_PRJEB4211_v1:scaffold_272:221222:229354:1 gene:GSCOC_T00006259001 transcript:CDP18705	MGFVSFLTMTKRFTGIIAILLLLSLTIASASQEFCDARMDYSVVGCGGSDSTSQRILIKGGTVVNAHHQQVADVFIDNGIVTDVKPNIKVSDEVTIVDATGKFVMPGGIDPHTHLEFEFMGTETIDDFFSGQAAALAGGTTMHIDFVIPVNGSLSSGFKAYVEKAKKSCMDYGFHMAITKWDDTVAREMEIMVKEKGINSFKFFLAYKGALMINDELLLEGLKKCKSVGALAMVHAENGDAVFEGQKRMIELGITGPEGHALSRPPLLEAEATARAIRLAGFVNTPLYVVHVMSVEAMEEIAKARQSGLSFKTIK	---NA---	0	14.124	22	3	6	3	1	315	34.1	6.13	179	3	0	2.713	3.371	1.243	1.44	1.75	0.31	0.0128281	0.00290364	0.926578	0.0413474	0.00879834	1	142.2	385.7	479.3	22.09	5.61	12.84	122.3	124.1	162.9	191.2	361.4	396.6	409.8	375.1	522.9	526	404.8	439.3	122.3	110.1
High	CDP13499	pep chromosome:AUK_PRJEB4211_v1:8:896450:897511:1 gene:GSCOC_T00038458001 transcript:CDP13499	MGKGSALSDGLVKKIILSYTYVAIWIFLSFTVIVYNKYILDRKLYNWPFPISLTMIHMAFCSSLAFLLVRVLKLVEPVALSRQLYLSSVVPIGALYALSLWLSNSAYIYLSVSFIQMLKALMPVAVYSIGILFKKDTYKGNTMLNMVAISVGVAIAAYGEAKYDSWGVLLQLGAVAFEATRLVLIQILLTSKGINLNPITSLYYVAPSCLFFLFIPWIFVEYPVLRENSSFHFDFVVFGTNSLCAFALNLAVFLLVGKTSALTMNVAGVVKDWLLIAFSWSVIKDTVTPMNLIGYGLAFLGVGYYNHSKLQALKAKEAQKKSQQADEESGKLLGETEGKDGVEGIGKKGDTQA	Probable sugar phosphate/phosphate translocator At2g25520	0	7.376	7	2	2	2	1	353	38.9	9.09	24	2	0	2.7	2.15	0.797	1.43	1.1	-0.33	0.00478668	0.023278	0.91094	0.0179275	0.0544922	1	87.7	236.6	188.5	10.69	26.15	41.59	85.8	81.5	103.7	89.6	198.5	171.8	282.1	298.8	133.8	131.9	294.6	265.6	85.8	72.3
High	CDP03767	pep chromosome:AUK_PRJEB4211_v1:1:35233805:35236920:-1 gene:GSCOC_T00016246001 transcript:CDP03767	MAETVFTPALEGMKHVKSEQGDMLTKPFLEVCKQILPVIDKFGAAMALVKSDIGGNITRLENKYLSDPAQFNHLYSMVQVEIEAKTAKSSSSCTNGLLWLTRAMDFLVELFRNLVDHPDWAMSQACTDSYSKTLKKWHGWLASSSFTIAMKLAPDRNKFMDVIGGKGDINADIEKFCTTFPPLLEENHKFLASVGLDDLKAS	---NA---	0	14.994	13	3	4	3	1	202	22.5	6.39	67	3	0	2.693	2.593	0.963	1.43	1.37	-0.05	0.0203382	0.0292433	0.99963	0.0608023	0.0667038	1	206.1	555	534.4	45.98	8.52	5.61	124.7	142.2	318.1	298.7	525.2	515.3	614.1	586.5	521.3	491.3	547.8	557.5	124.7	126.1
High	CDP12590	pep chromosome:AUK_PRJEB4211_v1:9:9227576:9229424:1 gene:GSCOC_T00036255001 transcript:CDP12590	MLPFLFLLLLPIFTSNSQPFCIAASHSIYDNFAACLTKNGIPSGQIPKILYSPTNTSFSSVLQAYVRNLRFNTSSTKKPSIIVTPLEIPHVQAAVLCTKGTGLELKIRSGGHDYEGISYVSDVPFIILDMFNLRSIHVDIPSETAWVQAGATVGELYYRIWEKSNAYGFPAGLCPTLGLGGHISGGGYGAMLRRFGLSVDNVLDAQIVDVKGQVLDRKAMGEDLFWAIRGGGGASFGVVLAYKLKLVQVPEIVTVFNVQRTEAENATDILVKWQNVADKIDNGLFIRVLVQPITSKGGKSKGQKIIRLTFIALYLGDSKSLMSVMNAGFPELGLKKSDCKEGSWIQSMLFWSNFDIGAKPELLLNRTSDVNFLKRKSDYVQTPIPKDALTSIFKKMVQL…	Berberine bridge enzyme-like 21; Short=AtBBE-like 21; Flags: Precursor	0	6.633	4	2	5	1	1	540	60.1	9.26	62	2	0	2.691	0.678	0.252	1.43	-0.56	-1.99	0.73027	0.986137	0.444192	1	1	1	226.3	609	153.5	84.35	85.86	79.75	563.1	579.9	87.2	90.9	1588.1	1524.4	243.3	215.5	350.9	361.7	63.4	67.1	563.1	514.4
High	CDP07587	pep chromosome:AUK_PRJEB4211_v1:10:2641136:2643159:1 gene:GSCOC_T00024886001 transcript:CDP07587	MRSSPLLAKYILHYSLHTHLPQKKLHFWLAFQGKQNMAALSSTGLLQPPSETTSPQQQEATPVSPQPKTTAPLPLREIPGSYGLPFIGPIKDRLDYFYNQGEVQFFSTRAQKYKSTVFRSNMPPGPFISSNSKVIVMLDGNSFPVLFDISKVEKKNLFTGTYMPSTKLTGGYRILSYLDPSEPKHTKLKNLLFFLLSNRKDHVIPEFHKSYTELFDSIDKEIAAKGRVTFDQDGAAFRFLGRAYYGADPADSSLGQDGPTLINKWVLFSLHPIASLGLPKFIEDPLLHTFPFPPCFVQKDYRKLYDFINANSTFVLDEAERNGIPRDEAAHNLVFATCFNTFGGIKVLFPNLMKWIGQAGVELHKKLVQEIRSAIESAGGTLTTQALENMPLTKSVVYE…	Allene oxide synthase 2, chloroplastic; Short=LeAOS2; AltName: Full=Cytochrome P450 74A; Flags: Precursor	0	134.148	45	24	68	24	1	537	60.5	7.62	1140	24	0	2.68	2.339	0.873	1.42	1.23	-0.2	5.61585e-05	0.000285178	0.879928	0.000612416	0.00127967	1	4166.7	11168.3	9745.2	13.24	12.08	14.08	4691.2	4649.4	3734.1	3686.1	12706.5	12136.7	10277.1	9945	10973.7	11113.4	8636.2	8654.3	4691.2	4124.1
High	CDP04827	pep chromosome:AUK_PRJEB4211_v1:11:5113197:5120566:-1 gene:GSCOC_T00019562001 transcript:CDP04827	MESSEIYRLGSLRLSSSNVWRNTTIDVFSKSSREEDDEEALKWAAIERLPTYHRLRRGILTDEEKGQRREVDIEHLGPAERKIILERQVKFAEEDNEKFLLKLKQRVDRVGIDLPTVEVRFQNLSVEAEAHVGSRALPTLVNFSANIVEGLLGYLHILPNRKKPFPILHDVSGIIKPARLTLLLGPPSSGKTTLLLALAGRLDSDLKVSGNITYNGHGLNEFVPQRTSAYISQHDLHIGEMTVRETLAFSERCQGVGPRHDMLEELSRREKQANIKPDPDIDIFMKAAALENQESTVKSDYIMKILGLEVCADTLVGNEMIRGISGGQRKRVTTGEMMVGASRVFLMDEISTGLDSSTTFQIVNSIKESIHILQGTAVISLLQPAPETYDLFDDVILLS…	Pleiotropic drug resistance protein 1; AltName: Full=ABC transporter G family PDR1; AltName: Full=Strigolactone transporter	0	16.395	4	5	8	3	1	1445	163.1	7.72	69	5	0	2.667	1.741	0.653	1.42	0.8	-0.62	4.67545e-05	0.00842482	0.0619548	0.000539228	0.0223612	0.282474	370.8	989	645.4	27.11	7.44	9.44	282.2	301.1	456.6	481.2	940.3	910.6	1060	1040.3	607.5	594.8	722.7	685.6	282.2	267.1
High	CDP07763	pep chromosome:AUK_PRJEB4211_v1:2:25938783:25942752:1 gene:GSCOC_T00025133001 transcript:CDP07763	MGGVSAAVSKTAAAPIERVKLLIQNQDEMIKAGRLSEPYKGIGDCFTRTVRDEGVVSLWRGNTANVIRYFPTQALNFAFKDYFKSLFNYKKDRDGYWKWFAGNLASGGAAGASSLVFVFSLDYARTRLANDAKAAKKGGERQFNGLIDVYRKTFASDGIAGLYRGFNLSCVGIIVYRGLYFGLYDSVKPVVLTGKLQDSFFASFALGWVITNGAGLASYPIDTVRRRMMMTSGEAVKYKSSLDAFTQIVKNEGVKSLFKGGAANILRAVAGAGVLAGYDKLQVLVLGKKYGSGGGA	---NA---	0	38.621	29	7	20	5	1	296	32	9.82	298	7	0	2.664	1.47	0.552	1.41	0.56	-0.86	0.0011412	0.304944	0.0545096	0.00563879	0.50195	0.260509	440	1172.1	647	23.83	25.76	6.89	345.7	365.8	529.2	549.6	1514	1411	973.7	897	598.3	630.8	663.6	702.6	345.7	324.5
High	Q9C9C4	Enolase 1, chloroplastic OS=Arabidopsis thaliana OX=3702 GN=ENO1 PE=1 SV=1	MALTTKPHHLQRSFLSPSRVSGERYLESAPSCLRFRRSGVQCSVVAKECRVKGVKARQIIDSRGNPTVEVDLITDDLYRSAVPSGASTGIYEALELRDGDKSVYGGKGVLQAIKNINELVAPKLIGVDVRNQADVDALMLELDGTPNKSKLGANAILGVSLSVCRAGAGAKGVPLYKHIQETSGTKELVMPVPAFNVINGGSHAGNSLAMQEFMILPVGATSFSEAFQMGSEVYHTLKGIIKTKYGQDACNVGDEGGFAPNVQDNREGLVLLIDAIEKAGYTGKIKIGMDVAASEFFMKDGRYDLNFKKQPNDGAHVLSAESLADLYREFIKDFPIVSIEDPFDQDDWSSWASLQSSVDIQLVGDDLLVTNPKRIAEAIKKQSCNALLLKVNQIGTVTE…	Enolase 1, chloroplastic; AltName: Full=2-phospho-D-glycerate hydro-lyase 1; AltName: Full=2-phosphoglycerate dehydratase 1; Flags: Precursor	0	12.604	10	4	9	1	1	477	51.4	6.13	85	4	0	2.661	3.389	1.274	1.41	1.76	0.35	0.00368293	0.000481691	0.814941	0.014409	0.00197461	1	122.5	326	415.2	20.33	13.16	21.98	152.4	141.3	101	106.3	281.4	294.7	362.4	360.6	352.3	321.5	497.2	489.3	152.4	125.3
High	CDP03586	pep chromosome:AUK_PRJEB4211_v1:1:36653095:36659389:-1 gene:GSCOC_T00015998001 transcript:CDP03586	MVYLSTFVAVCGAYEFGCCAGYSSPTQSAIREDLNLSISEYSLFGSILTFGAMIGAITSGPIADFVGRKGAMRLASGFCVAGWLAIYFSKGAVPLDIGRMATGYGMGVFSYVVPVFIAEIAPKDLRGALTTINQFMIVAGVSVSFIIGTLLAWRTLALVGLLPCAVLLLGLFMIPESPRWLAKGGRRREFEVALQKLRGSKADISEEAVEIQDYIETLERLPKAKIVDLFQRRYLRSVTIGVGLMVVQQLGGINGVCFYTSSIFETAGFNPDVGTITYAILQVVITGLGATLVDRAGRKPLLLVSGAGLVIGCLLTGISFYLKVHELALKTVPVLAVTGVLVYIGSFSAGMGAVPWVVMSEIFPINIKGVAGSLATLVNWFGAWLCSYTFNYLMTWSSP…	Probable plastidic glucose transporter 3	0	28.546	10	4	15	4	1	439	46.9	8.41	253	4	0	2.66	2.314	0.87	1.41	1.21	-0.2	0.000801958	0.00401252	0.911605	0.00457309	0.0116399	1	370	984.1	856.2	21.2	10.77	8.35	427.3	459.9	296.6	320.4	1144.3	1020.7	948.8	894.6	921.8	902.1	812.6	772.8	427.3	407.9
High	CDO97351	pep chromosome:AUK_PRJEB4211_v1:2:18350422:18360026:-1 gene:GSCOC_T00014669001 transcript:CDO97351	MGKKRVMLPAAEVDLTAVKYEFEQVQAPHLTGFSLKLLVGLLEAPFIGPMLLSHLKKQNRVVEMLRNTVIPEPPMFRPEFPPQEPESGVAHLEEDGKPEDRVELALKCLPHYDPDETWIADSIASFCYWKIRDYAYAYRSKLTTPSIVAERFIAAIGEFDNKNPSTPLLISYDPEDIRKQAAASTQRFEEGKPLSVLDGTFMAIKDDIDCHPYPSNGGTTWLHEVRKVKKDAVSVSRLRSCGVILVGKANMHEFGLGTTGNNPNHGTARNPHSPDRYTGGSSSGPAAIVASGLCSAALGTDGGGSVRIPSSLCGVVGLKTTYGRTDMRGALCDSGTVEIIGPITSSVEDALLVYAAILGSSAADRIALRPSLPCLPYLSSHEGLNAVGSLRLGKYTEWF…	Fatty acid amide hydrolase; AltName: Full=N-acylethanolamine amidohydrolase	0	33.974	17	8	13	8	1	608	66.2	6.54	228	8	0	2.659	3.082	1.159	1.41	1.62	0.21	0.325421	0.197654	0.997083	0.605437	0.345771	1	929.2	2471.2	2863.4	60.13	58.15	58.12	1600.4	1690.6	500.5	539.5	4271.6	4200.6	1453.7	1345.3	5005.2	4962.7	1641.1	1652.1	1600.4	1499.6
High	CDP06113	pep chromosome:AUK_PRJEB4211_v1:5:24464743:24466195:-1 gene:GSCOC_T00021499001 transcript:CDP06113	MFSMRVQVALGEKGIEYEYKEEDLGNKSPLLLQLNPVHKKIPVMIHNGKPVCESLIIVQYIDEVWHDKNPLLPSDPYQRAQARFWADFVDKKVYDSTRRIWTTKGEEKEAAKKEFIEILKTLEGELGNKPYFGGENFGYVDVALIPFYCWFYAYETFGNFKIECPKLVEWAKRCMQRESVSKSLADPHKVYEFVVSLKKKLGIE	Probable glutathione S-transferase MSR-1; AltName: Full=Auxin-regulated protein MSR-1	0	36.725	22	7	19	5	1	204	23.8	7.36	137	7	2	2.657	2.738	1.03	1.41	1.45	0.04	0.119658	0.102505	0.999984	0.270369	0.197982	1	1752.5	4657	4798.3	36.64	28.54	29.35	2488.2	2402.8	1278.2	1258.8	6122.5	5768	3760	3454.6	6020.6	6365.8	3570.4	3824.1	2488.2	2131.3
High	CDP05926	pep chromosome:AUK_PRJEB4211_v1:5:25946420:25951739:-1 gene:GSCOC_T00021247001 transcript:CDP05926	MGVEVVESKLPHVSGETAGEENSLLKENGKISNVMGLSEPITFGSHGMDEPVKGEKNKAAEVNFPKDAVDEWPAPKQIHSFYFVRYRLHEDQKLKAKLDQADTELQKKNQARSQLIEKLRKLKADRAQKIAFLKDLNKENKQYRELIDEKKKEREPLQQALGQLHGGRDRGSGICSSEEELNHRIKSLQYHIQHESITLNEEKQILREIKQLEGTREKVIANAALRAKIQESMGEKEALEDQMKLIRVDMDGVRKDQQLVLAKRKQLEEEKEAIEKEIKSLEEELTAVTQKRDKTFENIQELRKQREEGNSAFYQNRSLLNKARGLAEKKDVEGLKELSETEVDKFISSWSGSEGFREDYERRILASLDGRQLSSDGRMRNPDEKPLVVVEVAPAAVTD…	Proton pump-interactor 3B	0	20.263	10	4	8	4	1	515	58.7	8.21	91	4	0	2.656	4.573	1.722	1.41	2.19	0.78	0.29405	0.0447059	0.800848	0.555674	0.0966978	1	556.2	1477.6	2543.8	43.48	38.12	44.77	367.8	378.9	816.5	831.7	1077.3	1039.9	2026.6	2163.1	1683.1	1693	3830.4	3822.2	367.8	336.1
High	CDO99322	pep chromosome:AUK_PRJEB4211_v1:3:5381304:5389108:-1 gene:GSCOC_T00026435001 transcript:CDO99322	MASATITSPPTPLINKKDAGLSAFSSQASFSVRKSQKRACKKIVSVMAPQQSERRPATTGSVKTGMTMTEKIFAKASEKSQLSPGENVWVNVDVLMTHDVCGPPAIGIFKREFGENAKVWDREKLVIIPDHYIFTTDERANRNVGILRDFCNEQNIKYFYDIQDLGNFKANPDYKGVCHVALAQEGHCRPGEVLLGTDSHTCTAGAFGQFATGIGNTDAGFVLGTGKLLLKVPPTLRFVMDGEMPDYLLAKDLILQIIGEISVAGATYKSMEFVGTTVESLTMEERMTLCNMVVEAGGKNGVVPADSTTYKYLEDKTSVPYEPVYSDEQARFLSEYRFDISKLEPLVAKPHSPDNRALARECKDVKIDRVYIGSCTGGKTEDFMAAAKVFLASGKKVKV…	3-isopropylmalate dehydratase large subunit, chloroplastic; AltName: Full=AtLEUC; AltName: Full=Isopropylmalate isomerase large subunit 1; Short=AtIIL1; Short=IPMI LSU1; Flags: Precursor	0	65.775	35	13	24	13	1	508	55.2	7.28	345	13	0	2.65	1.625	0.613	1.41	0.7	-0.71	5.21226e-05	0.0304723	0.025883	0.000588586	0.0690439	0.153435	1953.4	5177.2	3174.6	27.45	2.25	7.55	2517.1	2466.3	1523	1547.2	5294.5	5083.9	5272.3	5080	3316.9	3421.7	3038.3	2905.8	2517.1	2187.6
High	CDP18893	pep supercontig:AUK_PRJEB4211_v1:scaffold_300:191467:195028:-1 gene:GSCOC_T00007493001 transcript:CDP18893	MSGAGKVVCVTGASGYIASWLIKMLLHRGYTVKASVRDLNDPKKTEFLMALDGAKERLRLFQANLLEEGSFDAIVDGCEGVFHTASPLLHPTSVTNPQIEQLDPALKGTLNVLRSCARVSTIKRVVLTSSMRAVTCNRELKDGVVVDESWFADPTYCEERKLWYPLSKILAENAAWEFSKEHGIDMVAIIPGMVIGPILQPYPSLTAGMVLNLVNGAASFYTARMRWVDVRDVAYAHILAFEVPSASGRYCVVEGFALWTEFIKTLNELYPTLQLSDECSTSTPLVEPNYEISNEKAKSLGIEFIPFNVCLKDTIESFKERNLVNF	Phenylacetaldehyde reductase; AltName: Full=2-phenylethanol synthase	0	7.783	9	2	2	2	1	326	36.2	5.72	27	2	0	2.643	3.45	1.305	1.4	1.79	0.38	0.884066	0.754347	0.998613	1	1	1	116.7	308.6	402.8	99.6	94.41	99.66	442.9	403.7	29.8	33.8	952.4	946.5	90	100.6	1404.1	1524.3	115.5	102.5	442.9	358.1
High	CDO98162	pep chromosome:AUK_PRJEB4211_v1:4:3318591:3323388:1 gene:GSCOC_T00022168001 transcript:CDO98162	MAFPSIFCCVKGSDRKDQRKKQAWRIFSLKELHSATNNFNYDNKLGEGGFGSVYWGQLWDGSQIAVKRLKVWSNKAEMEFAVEVEILARVRHENLLSLRGYCAEGQERLIVYDYMPNLSLLSHLHGQHSAECLLDWNRRMNIAIGSAEGIAYLHHHATPHIIHRDVKASNVLLDSDFQARVADFGFAKFIPDGATHVTTRVKGTLGYLAPEYAMLGKASESCDVYSFGILLLELASGKKPIEKLNATTKRTITDWALPLACESKFGELADPKLKGNYVEEELKRVVFVALICAQNRPEKRPTMLEVVDLLKGDSEEKFVALENDEMFKNTRPADYNDGLSGAEDSSDFISEEKDVKQEGEKVKEQKEEIEKVDG	PTI1-like tyrosine-protein kinase At3g15890	0	5.611	3	1	2	1	1	374	42.1	6.1	62	1	0	2.64	1.561	0.591	1.4	0.64	-0.76	0.0165441	0.421758	0.344592	0.0511354	0.660286	0.9295	141.1	372.6	220.3	10.04	5.6	44.43	151.3	155.7	127	131.7	363.6	345.8	393.1	381.9	346.9	324	149.8	149.4	151.3	138.1
High	CDP06868	pep chromosome:AUK_PRJEB4211_v1:1:27294934:27296241:-1 gene:GSCOC_T00023900001 transcript:CDP06868	MANMAIASNIMKRLQGKVALITGAASGIGESAARLFVKHGAKVVIADIQDDLAKKVCQDLDPSSASHVHCDTTQESDIENAVNTTVSKYGKLDIMFNNAGIAGSGTSNILDDKKSDFERVISVNLVGVFLGTKHAARVMIPNRCGSIINTASSCSTLGGGAPHAYVSSKHAVVGLTRNTAIDLGRYGIRVNCLSPYYVPTPLAADVVERIYGGVSKVYKFLDGAELKAEDVADAALYLASDDSKYVSGHNLVVDGGYSIVNSAVCMFENSQK	Secoisolariciresinol dehydrogenase	0	16.811	11	3	8	3	1	272	28.6	7.12	223	3	0	2.637	10.771	4.084	1.4	3.43	2.03	0.0512197	2.01197e-05	0.00261411	0.132882	0.00015371	0.0285058	102.9	271.3	1107.9	21.23	28.72	53.18	88.9	86.7	119	132.7	216.8	195.7	344	339.4	653.7	682.4	1798.6	1817.6	88.9	76.9
High	CDO98407	pep chromosome:AUK_PRJEB4211_v1:4:5227603:5232455:1 gene:GSCOC_T00022489001 transcript:CDO98407	METVQKGKGTTFGFKNLMATFTVNVHRAEGRRLNVPLIAPFTIATSRLDKVENVAIRIELSNGCVGWGEAPILPFVTAEDQPTALAKAEEACEFLRQSSGKSMCFILGEIGQILPGHQFASVRAGIEMALIDAAATSTGIPLWRLFGGASNTITTDITIPIVSAAEASELASKYRTRGFKTLKLKVGKNQCGDIEVLQAIRKAHPDCLFILDANEGYTSKEAIEVLEKLHEMDVTPILFEQPVHRDDWEGLGQVTAIATDKYGVSVAADESCRSLADVQRIVKEKLADVVNIKLAKVGVRGALEIIEFARASGLDLMIGGMVETRLGMGFASHLAAGFGCFKFIDLDTPLLLAEDPVLEGYEVSGPNYKFSNARGHGGYLHWKDVAW	L-Ala-D/L-amino acid epimerase; AltName: Full=L-Ala-D/L-Xxx epimerase	0	7.166	15	2	3	2	1	387	41.9	5.87	42	2	0	2.632	1.947	0.74	1.4	0.96	-0.44	0.0313594	0.208905	0.807382	0.0876657	0.363072	1	59.5	156.7	115.9	4.24	7.58	8.18	55.7	61.7	59.1	59.9	150.1	145.6	171.4	163.5	125	102.5	117.7	114.1	55.7	54.7
High	CDP01424	pep chromosome:AUK_PRJEB4211_v1:7:12264833:12266725:-1 gene:GSCOC_T00036468001 transcript:CDP01424	MAKLLVLVALCILPAIASAAIPEPFTVTGKVYCDTCRVGYETPATTYLPGCIVKLVCKKRDNPDQITFTKEATTDSTGKYEMQVAYDAGDDICEMEHVKSSDPTCATPNAGRDHARICLTRNNGMVSNVRHANNIGYFRDVPLARCPQILQRYQDAESD	---NA---	0	23.654	35	3	8	3	1	159	17.5	6.3	170	3	0	2.603	4.271	1.641	1.38	2.09	0.71	0.00715351	0.00011788	0.229179	0.0254132	0.000612891	0.723897	245.7	639.6	1049.3	11.67	23.37	35.31	222.6	233.9	258.1	288.7	533.1	501.1	767.3	788.2	781.6	747.2	1462.2	1408.8	222.6	207.5
High	CDP02507	pep chromosome:AUK_PRJEB4211_v1:7:4420424:4428817:-1 gene:GSCOC_T00039907001 transcript:CDP02507	MVTPLLTDLYQFTMAYAYWKAGKHDERAVFDLYFRKNPFGGEYTIFAGLEDCIRFVAHFNFTEDEIAFVRATLPPPCEDSFFDYLRGLDCSDIEIYSISEGSVVFPKVPLLRVEGPVAVVQLLETPFVNLINYASLVATNAARHRFVAGKSKLLLEFGLRRAQGPDGGISASKYCYMGGFDATSNVAAGRLFGIPLRGTHSHAFVSSFLSPDEILEKSLCSCDGSTVCEDFVSWVQTWLSKLKRSKLLAGIFGETNQSELAAFMSYALAFPNNFLALVDTYDVVRSGIPNFCAVALALNDLGYKAQGIRLDSGDLAYLSCEARKFFHSIETEFGVPDFGRTSITASNDLNEETLDDLNKQGHEVDAFGIGTHLVTCYAQPALGVVFKLVEINNQPRIKL…	---NA---	0	45.323	20	7	11	7	1	537	60.3	6.11	219	7	0	2.595	3.663	1.412	1.38	1.87	0.5	0.00135129	4.83171e-05	0.376407	0.00644776	0.000287426	0.982319	185.6	481.6	679.9	8.56	20.94	17.73	181.1	170.1	190.2	208	576.4	579.7	398.9	402.3	775.7	823.5	595.9	582.6	181.1	150.9
High	CDO98315	pep chromosome:AUK_PRJEB4211_v1:4:4536636:4540835:1 gene:GSCOC_T00022371001 transcript:CDO98315	MSLLSDLINLDLSESTQKIIAEYVWIGGSGMDIRSKGRTLPGPVNDPAKLPKWNYDGSSTGQAPGEDSEVILYPQAIFKDPFRRGNNILVMCDAYTPAGEPIPTNKRYNAAKIFSSPEVVAEEPWYGIEQEYTLLQKEVNWPIGWPVGGYPGPQGPYYCGAGADKAFGRDIVNSHYKACLYAGINISGINGEVMPGQWEFQVGPAVGISAGDEVWMARYILERITEIAGVVLSFDPKPIQGDWNGAGAHTNYSTKSMRSDGGFNVIKKAIEKLKLRHKDHIAAYGEGNERRLTGKHETADINTFSWGVANRGASVRVGRDTEKAGKGYFEDRRPASNMDPYVVTSMIAETTIVWKP	Glutamine synthetase nodule isozyme; Short=GS; AltName: Full=Glutamate--ammonia ligase	0	114.974	46	13	46	8	1	356	39.1	6.19	802	13	1	2.589	3.116	1.204	1.37	1.64	0.27	7.05223e-05	9.32911e-06	0.725526	0.000718059	8.0431e-05	1	803.9	2081.1	2504.6	33.51	6.63	10.52	575.9	605.4	1067.4	1078.5	2248.7	2186.4	1980.8	1980.1	2796.4	2711.1	2282.6	2313.8	575.9	537
High	CDP04453	pep chromosome:AUK_PRJEB4211_v1:9:861644:869317:1 gene:GSCOC_T00017849001 transcript:CDP04453	MAAAAATLLSNGDAKPQNTGRFASVYSEVQNNRLDHSLSLPAVLRKSFQVVDGPPSSAAGNPDEIKKLFPCLFGQPSAVLVPGDAGNAPQSLKVGVVLSGGQAPGGHNVISGIYDYLQDRCKGSTLYGFRGGPAGIMKCKYTVLNSEYIYPFRNQGGFDMIRSGRDKIETPEQFKQAAETALKLDLDGLVVIGGDDSNTNACLLAENFRNKNMKTRVIGCPKTIDGDLKCKEVPASFGFDTACKIYAEMIGNVMVDARSTGKYYHFVRLMGRAASHITLECALQTHPNITLIGEEVAANKQTLKNVTDYIVDIITKRAEFGYNYGVILIPEGLIDFIPEVQLLIAELNEILAHDEVDEAGLWKQKLQPQSLELFKLLPAAIQEQLMLERDPHGNVQVAK…	Pyrophosphate--fructose 6-phosphate 1-phosphotransferase subunit beta 2; Short=PFP 2; AltName: Full=6-phosphofructokinase, pyrophosphate dependent 2; AltName: Full=PPi-PFK 2; AltName: Full=Protein MATERNAL EFFECT EMBRYO ARREST 51; AltName: Full=Pyrophosphate-dependent 6-phosphofructose-1-kinase 2	0	35.318	9	6	14	6	1	563	61.3	6.55	230	6	0	2.582	2.862	1.108	1.37	1.52	0.15	4.69319e-06	1.51418e-06	0.931963	0.000106737	1.77579e-05	1	649.9	1678.2	1860	2.67	9.61	9.83	648.9	676.3	650.9	634.4	1877.6	1787.3	1575.9	1541.6	2026.2	1994.5	1664.1	1734.6	648.9	599.9
High	CDO99115	pep chromosome:AUK_PRJEB4211_v1:3:3292786:3295410:1 gene:GSCOC_T00026145001 transcript:CDO99115	MLAVFEKSVAKSPDALQTPNSESVSALKDGFLAQHFSSLQPGSVTINLGSSGFMAYSSDKQNPLLPRLFAVVDDIFCLFQGHIENVAHLKQQYGLNKIANEVIIVIEAYRSLRDRGPYPPDQVVRDIHGKFAFILYDSTAKTTFMAADVDGSVPFFWGTDSEGHLVVSTDLDVVKKGCGKSFAPFPKGCFFTSSGGLRSYEHPHNELKPVPRVDSSGEVCGANFKVDAEAKKGGTGMPRVGSAANWSQNY	Stem-specific protein TSJT1	0	17.084	12	3	4	3	1	250	27.1	6.87	179	3	0	2.574	4.375	1.7	1.36	2.13	0.77	0.638513	0.212738	0.907457	0.990326	0.368629	1	112.3	288.9	491.1	58.55	78.22	83.84	186.9	194.4	67.4	57.7	612.5	658.8	136.3	109.8	1310.8	1165.9	206.8	192.1	186.9	172.4
High	CDP05639	pep chromosome:AUK_PRJEB4211_v1:9:12515934:12529555:1 gene:GSCOC_T00020809001 transcript:CDP05639	MLYLAITCMDLCEKQICQSLHTLWSAPFRIVVALILLYQELGVASLLGALLLVLMFPIQTLIISKMQQLSKEGLQRTDKRIGLMNEILGAMDTVKCYAWEDSFQSKVQNVRNDELSWFRRAQLLAALNSFILNSIPVVVIVVSFGMFTLLGGDLTPARAFTSLSLFAVLRFPLFMLPNIITQVVNANVSLKRLEELLLAEERILLPNPPLEPEVPAISIKNGYFSWESKADKPTLSNINLDIPIGSLVAIVGSTGEGKTSLISAMLGELPPASDATAVVLRGTVAYVPQVSWIFNATVRDNILFGAVFEPSRYETAIDVTSLQHDLELLPGGDLTEIGERGVNISGGQKQRVSMARAVYSNSDVCIFDDPLSALDAHVARQVFERCIKGELRGKTRVLV…	ABC transporter C family member 2; Short=ABC transporter ABCC.2; Short=AtABCC2; AltName: Full=ATP-energized glutathione S-conjugate pump 2; AltName: Full=Glutathione S-conjugate-transporting ATPase 2; AltName: Full=Multidrug resistance-associated protein 2	0	48.336	16	11	22	10	1	1225	136.2	5.69	356	11	1	2.571	3.437	1.337	1.36	1.78	0.42	0.000274464	1.23512e-05	0.386866	0.00197899	0.000101941	1	766.8	1971.1	2635.3	19.57	2.51	3.08	644.5	647.5	911.1	908.1	2020.4	1901.9	1981.3	1960.9	2757.6	2651.5	2563.6	2619.2	644.5	574.3
High	CDP15577	pep chromosome:AUK_PRJEB4211_v1:1:26049755:26054228:1 gene:GSCOC_T00015469001 transcript:CDP15577 description:Succinate dehydrogenase subunit 6, mitochondrial [Source:Projected from Arabidopsis thaliana (AT1G08480) UniProtKB/Swiss-Prot;Acc:Q941A6]	MAEAEAAESQKGFFKKHWEGYKEFWCERFSFLNNYSRFIKREKPLPSWTDSDVEEFIASDPIHGPVLKTAREAVKYGAVGSVVGAVTTAGWAWKYSRSLHGAGLSFAAGAVFGWTFGQEIANHHLQLYRLNTVAAQTKFLEWWQKKVEGH	Succinate dehydrogenase subunit 6, mitochondrial	0	20.077	35	2	4	2	1	150	17	8.62	115	2	0	2.566	2.654	1.034	1.36	1.41	0.05	0.00228551	0.00224107	1	0.00996737	0.00705735	1	142.5	365.6	378.1	17.31	14.15	8.22	155.2	164.6	110.8	130.8	416.9	408.6	318.9	327	387	387.6	369.4	323.4	155.2	146
High	CDP15766	pep chromosome:AUK_PRJEB4211_v1:6:26350472:26352726:1 gene:GSCOC_T00015836001 transcript:CDP15766	MATGLVRRAIARVQSSAPAAKLVITRAHASEAEAQQAEPQAKKTHSLKTFQIYRWNPDNPQKPELKDYHIDLKECGPMVLDALIKIKNEIDPSLTFRRSCREGICGSCAMNIDGCNGLACLTKIDSDGSSATTITPLPHMFVIKDLVVDMTNFYNQYKSIEPWLKRKSSPPTPGKEIPQSKNDRAKLDGMYECILCACCSTSCPSYWWNPESYLGPAALLHANRWIMDSRDEYTKERLDAVNDEFKLYRCHTILNCARACPKGLNPGKQIQNIKKLELLGS	Succinate dehydrogenase [ubiquinone] iron-sulfur subunit 2, mitochondrial; AltName: Full=Iron-sulfur subunit of complex II; Short=Ip; Flags: Precursor	0	5.892	4	2	5	2	1	281	31.5	8.34	48	2	0	2.566	2.533	0.987	1.36	1.34	-0.02	7.48696e-06	6.97707e-06	0.999998	0.000135749	6.32376e-05	1	377.2	968	955.6	15.39	17.01	16.24	408.2	464	333.4	348.5	1113.8	1118.3	818.3	841.4	1147.3	1077.5	847.4	836.8	408.2	411.6
High	CDP05326	pep chromosome:AUK_PRJEB4211_v1:2:3339336:3342474:-1 gene:GSCOC_T00020327001 transcript:CDP05326	MSSFRRFELIDHSPFLPAFFEKETSLFSTKSLTLDHPYFPSFPPEHELDFTLDLLNPAPKPLPALLDFPSPSLFDTFHTITDLTQVEKTPFCISTRRVQHRVDPVGLRTEFYLQRLCDRVSALELSFDRLAKEKKSRVGERKYTWTAEIKAPEEDGVDRKYKWTSEIKDGKKKGHLEKNYKYTAEIKGKGEDSPISRKYTFTASTGDAGESSGKEKKDVEKKDKKKRDKSEKSTGGCSTRIVEIQEEPSHHGALVLRQAFARRVDRSRGKRKELSPNDAAIKIQLSFKAYLIKRSKALRALRELAIAKSKLKEIRALFNNFSYRRRLARDTEERQRFSEKIIVLLLTVDAIEGADVLVRAAKKSMVDELEAMLDVVDPQPAGRSLSLKRRTFDMPDAVI…	---NA---	0	101.227	34	12	62	12	1	424	48.3	9.33	865	12	0	2.558	2.769	1.082	1.36	1.47	0.11	5.39429e-07	1.80199e-07	0.909042	2.35462e-05	3.08559e-06	1	2060.1	5270.6	5704.9	11.44	12.64	10.87	1788.2	1911	2267.9	2220.8	4799.4	4563.4	5847.3	5788	5239.2	5070.4	6212	6225.5	1788.2	1695.1
High	CDO98534	pep chromosome:AUK_PRJEB4211_v1:4:6509934:6511681:1 gene:GSCOC_T00022666001 transcript:CDO98534	MSISPNQSPHVLLFPYPTAGHVIPLLDLANLLLTKGLTITILVTPPNLPLLDPLLSTHPSTSIQRLVLSLPELVNSSGVNFATRLRATAQLHDTVLEWFQSQQSPPVAIISDFFLGWTHHLAAQLGVPRVVFWPSGAHHALILHHLWHNLSEKISSMNEDSMISFPSLPNSPAYPLWQVAELITQSKPGEPDWEFFRDNFLSNARSWGIIINSFRDLEDTCINLVKTEICHDEVWAIGPLVLSSSASTAAATGDTSALSNRGGSSAVPLDEVMTWLDDKADDSVVYVCFGSREVLTSQQTDALAAALECSGVHFIWCAREAQQNKGQVSCDDQTSALLTMEYEDRVAGKGLIIRGWAPQVAILQHRAVGAFLTHCGWNSVLEGVAAGVVLLTWPIGADQ…	---NA---	0	19.834	15	3	10	3	1	485	52.5	5.62	181	3	0	2.553	2.889	1.132	1.35	1.53	0.18	0.345689	0.242431	0.998907	0.635253	0.413756	1	34.3	87.5	99.1	22.29	46.13	56.36	33.5	32.7	35.1	50.6	55.5	61.5	124.7	143.6	58.1	58	168.8	168.8	33.5	29
High	CDP14218	pep chromosome:AUK_PRJEB4211_v1:6:18999937:19002422:1 gene:GSCOC_T00040487001 transcript:CDP14218	MAYLYLKQGKNYSQSRPNYPEELFHFIASKTPHHDLVWDAGTGNGQAASSLAKIYKNVIATDTSQKQLELASRLPNVQYKCTSPTMSAEELERDVAKQATVDLVTVGQAIHWFDRPKFYQQVQLVLKKPQGVIAAWCYTTPQVNARVDAVFNKFYFVDSRPYWHPGRNLIYDKYESIEFPFFPVEGAENTGPFEFMTEKLMSLDELLAYAKSGSAYETALEKGVDLMSEDVIEEFRSAWAEDGNNQKVAKFPIYLRIGKAGMSLQDYIRR	---NA---	0	13.202	21	3	3	3	1	270	30.8	6.42	85	3	0	2.547	3.204	1.258	1.35	1.68	0.33	0.0333339	0.00811739	0.945437	0.0920228	0.021615	1	78.3	199.4	250.9	49.79	7.05	11.01	116.5	108.9	35.8	56.3	186.1	190.3	215.2	208.9	226.7	230.1	279	273.5	116.5	96.6
High	CDP20358	pep supercontig:AUK_PRJEB4211_v1:scaffold_1129:30260:38667:-1 gene:GSCOC_T00007031001 transcript:CDP20358	MAASEEVKVPRIKLGSQGFEVSAQGQGCMGMSAFYGPPKPEPDMIKLIHHAICRGITHLDTSDIYGPHTNEILIGKALKEGIRAKVELATKFAISYQDEKFDVRGDPAYVRACCEASLKRLDVDCIDLYYQHRIDTRVPIEVTIGELKKLVEEGKIKYIGLSEASASTIRRAHAVHPITAVQLEWSLWTRDVEEEIIPTCRELGIGIVAYSPLGRGFFSSGPKLIENLAEGDYRKALKEGIRAKVELATKFAISYQDGKVDVRGDPAYVRACCEASLKRLDVDCIDLYYQHRIDTRVPIEVTIGELKKLVEEGKIKYIGLSESSASTIRRAHAVHPITAVQLEWSLWSRDVEEEIIPTCRELGIGIVAYSPLGRGFFSSGPKLVENFTEGDRRKGMPRF…	Probable aldo-keto reductase 2	0	135.454	51	23	88	2	1	506	56.1	6.71	1470	23	3	2.545	3.165	1.244	1.35	1.66	0.31	0.000518694	5.82978e-05	0.729994	0.00324067	0.00033823	1	764	1944.2	2418.2	3.32	2.59	1.98	744.9	748.7	779.5	798.2	2031.3	1920.9	1962.4	1926.2	2418.8	2485.2	2417.6	2368.1	744.9	664.1
High	CDO97025	pep chromosome:AUK_PRJEB4211_v1:2:15971168:15976060:1 gene:GSCOC_T00014240001 transcript:CDO97025	MDFVERRPFYLYSKPQITRNVEAYKDALEGLSSIIGYAIKANNNLKILEHLRHLGCGAVLVSGNELKLALHAGFDPTKCIFNGNGKLLEDLVLAAEAGVFVNVDSEFDLENIVAAARIAGKKVNVLLRINPDVDPQVHPYVATGNKNSKFGIRNEKLQWFLDAVKSHPNELKLVGAHCHLGSTITKVDIFRDAAVLMVSYIDEIRAQGFQIDYLNIGGGLGIDYHHTGAILPAPRDLIDTVRELVLSRNLNLIIEPGRSLIANTCCLVNRVTGVKTNGTKNFIVIDGSMAELIRPSLYDAYQHIELVSPPPSDAEVSTFDVVGPVCESADFLGKDRKLRTPSRGAGLVVHDAGAYCMSMASTYNLKMRPPEYWVEDDGSVSKIRHAETFEDHLKFFKDL	Diaminopimelate decarboxylase 1, chloroplastic; Short=DAP decarboxylase 1; Short=DAPDC 1; Flags: Precursor	0	9.725	13	3	4	3	1	399	44	6.6	69	3	0	2.53	2.759	1.091	1.34	1.46	0.13	5.08915e-12	4.57112e-12	0.24594	4.12815e-09	4.46386e-10	0.741407	141	356.7	389	3.57	4.11	4.89	138.1	147.5	143.9	136.6	359.8	382	348.2	353.5	404.8	364.2	378.5	399.8	138.1	130.8
High	CDP18868	pep chromosome:AUK_PRJEB4211_v1:10:27514663:27520252:1 gene:GSCOC_T00013410001 transcript:CDP18868	MGFIVSSACIIISIELVLASFCDVGCRVSMAAATEQDFVSSYISALGDPGMKNPNARFAFEAWNFCNEVGSEAPNMGSPRLADCADLQCTQFPVPADMPSSLLLDKRSKCQVIQKVNESDNKLGTGDQFPDTEFKAYSDPDLYAVEKELYLGSLCEVHDTAEPWYFWMIMLKNGNFDKNTTLCPENGRKVSKIVTGRTFPCFGKGCMNQPLVYHNSSRVDFSGDQASLIGGFYGTYDLDTHLSSEVGSKSFFAVSWQKNLISGSWIVSNKLTTSTKYPWLMLYLRADATEGFNGGYHYNGRGIMRKLPESPHFKVKLTLEVKQGGGPNSQFYLLDIGSCWKNSGAPCNGDVITDVTRYSEMIINPATTSWCRPNNLVSCPPYHISPTGEKVYRNDTSRF…	---NA---	0	14.54	11	4	5	4	1	530	59.1	5.38	74	4	0	2.505	0.825	0.329	1.32	-0.28	-1.6	0.690906	0.998094	0.517985	1	1	1	302	756.5	249.2	83.09	73.26	78	118.2	123.4	738.6	743.3	376.6	330	1625.2	1519.5	114.5	100.1	563.3	542.4	118.2	109.5
High	CDP08090	pep chromosome:AUK_PRJEB4211_v1:3:30856600:30859738:-1 gene:GSCOC_T00026810001 transcript:CDP08090	MGEVEVSNKQVILKNYVSGFPKESDMEVKTTSLKLKLSEGDSSVAIIVKNLYLSCDPYMRSRMSKLEGQYVDSFTPGSPIVGYGVAEVLDSSHPNFKKGDLVWGITTWEEYSIITATEGLFKIQHTDVPLSYYTGILGMPGMTAYVGFFEVCSPKKGERVFVSAASGAVGQLVGQFAKLFGCYVVGSAGSKEKVDLLKNKFGFDEAFNYKEEADLNVALKRYFPDGIDIYFENVGGKMLDAVLLNMSLNGRIAACGMISQYNLEQQEGIKEGKITYVEDIAEGLENAPSSLIGLFSGLNIGKQVVSVTRG	2-alkenal reductase (NADP(+)-dependent); AltName: Full=Alkenal double bound reductase; AltName: Full=Allylic alcohol dehydrogenase 1; Short=allyl-ADH1; AltName: Full=Flavin-free double bond reductase; Short=NtDBR; AltName: Full=Pulegone reductase; Short=NtRed-1	0	30.894	26	5	10	3	1	310	33.8	5.2	161	5	2	2.504	6.9	2.756	1.32	2.79	1.46	0.0916311	0.000417137	0.0659585	0.216542	0.00175821	0.29628	307	768.6	2118.3	65.65	25.28	11.1	148.7	165.3	570.4	570.2	631.7	617	1004.4	935.1	1963.8	1977	2269.6	2459.6	148.7	146.6
High	CDP16029	pep chromosome:AUK_PRJEB4211_v1:5:180951:186523:1 gene:GSCOC_T00017019001 transcript:CDP16029	MEAETIANPELPNVKLAADEGSIIKAPTKQKEGKKEEEETALDGEFIKVERESFDAKDGSRVVATEASVDSKPSVAEESLSNSSASREFLEAQEKAREIELELERVAGALKDSESQNAQLKHELSLTKGLLEEAGKKYEELELGHQKLQRQTVEAEERHTAQLKALEEAIRSQELKHKELTEVKEAFGNLTLQFDSSKKKMEELEQELQTSADEARKFEELHRESGSYAESETKRALEFERLLEHAKVSAKHAEDQMTSLQEELKGMYDKIAENEKVEEALKTTANELSTVQGELELSKSQLLDVEQRLASKDALIHELNQELDVRKASESQVKEDVSALDISLSSIKEELRSKASDLEDAKFKLQEEESAKGQVEVKLKDQEAKVSTMQEKVAKLTAG…	---NA---	0	244.286	43	48	107	48	1	1311	146.5	4.78	1330	48	0	2.492	2.215	0.889	1.32	1.15	-0.17	9.51597e-06	4.58329e-05	0.860874	0.000164819	0.000278527	1	7268.2	18109	16101.8	18.02	15.83	15.85	6095.2	6266.4	8430.1	8495.2	15948.5	15424.3	20562.2	20745.7	14072.8	13911.7	18459.5	18423.3	6095.2	5558.4
High	CDP00589	pep chromosome:AUK_PRJEB4211_v1:11:27823087:27827863:1 gene:GSCOC_T00032577001 transcript:CDP00589	MEQAIQVSVGFALQNLLQLIDENRRLISDNYEKITDLQADVRLLKAFMAEYTAKYRNSKPLTELADEIRSRVFEVEDLMETYIAEEILYQSKNFFKKAVRAREHLSNLRILGETVQKLSAKVKKTNEDNKEIGLHLVALEELSRESSRHSSMSEENQTGGNQEPDRIIGFEDAADNVLELLGGKKLVQGKSEGEEQSNSDAEQHSESKELEMASIHGMLGLGKTTLARKVLNDLRIEYHFFTRIFVTVSNEYNKKEVLLSILSAFIKNIREQNKTEEELVGMVRHELKYKYLIVMDDVWQNDVWEDIKTFLPDNGKGSRVLVTTRIESVANYVATKTKPYKLRLMFAEEAEELLRIKVFDENTCPEELESIEKKILAKCDRLPLAIVVTAGILRNHPKD…	Putative late blight resistance protein homolog R1A-10	0	42.988	10	7	14	7	1	907	104.1	7.99	203	7	0	2.479	2.211	0.892	1.31	1.14	-0.17	0.0158373	0.0383756	0.989642	0.0491268	0.0843356	1	844	2092.4	1866.2	38.18	22.7	22.91	580	605.4	1178.9	1176.7	1732.4	1713.4	2600.9	2527.3	1533.7	1529.4	2307.3	2270.8	580	537
High	CDP10414	pep chromosome:AUK_PRJEB4211_v1:6:6796208:6801278:-1 gene:GSCOC_T00031134001 transcript:CDP10414	MAQILLHGTLHATIYEIDKLKGGFGQNLLHKIVEGIERVVGFNNTASRLYATVDLEKARVGRTRLLEGDSNPRWYESFHIYCAHMASNVIFTVKVDNPIGAELIGRAYLPVQELLGEEEIDRWLPILGDDHKPIHGHSKIHVKVQYFDVTRERNWSRGIKSARFPGVPYTFFSQHNGCKVTLYQDAHIPDNFIPKIPLAGGKFYEPHRCWEDMFDAITKAKHLIYITGWSVYTEITLVRDSRRPKPGGDMTIGELLKKKANEGVRVLMLVWDDRTSVKLLKEDGLMATHDEETGAYFEGTEVHCVLCPRNPDDGRSIIQNIEIGTMFTHHQKIVVVDSEMPNGNTERRRIVSFVGGIDLCDGRYDTPFHSLFRTLGTAHHDDFHQPNFKNSSIQKGGPR…	---NA---	0	61.36	22	13	26	12	1	807	92	6.62	568	13	0	2.479	2.191	0.884	1.31	1.13	-0.18	0.0138209	0.0387976	0.981744	0.0438644	0.0851302	1	1216.9	3016.3	2665.7	32.77	30.7	26.78	1713	1596.1	927.8	925.6	3988	3907.3	2328.5	2253	3361.3	3345.3	2124.2	2058.9	1713	1415.8
High	CDP01568	pep chromosome:AUK_PRJEB4211_v1:7:10742525:10745346:1 gene:GSCOC_T00036660001 transcript:CDP01568 description:NIC1 [Source:Projected from Arabidopsis thaliana (AT2G22570) UniProtKB/TrEMBL;Acc:A0A178VQ19]	MESQTMDQLKKELPVEQETLVLSDDVKTGLVLVDIVNGFCTVGAGNLAPVAPDKQISGMVDESVRLAKMFCEKKWPIYALLDSHHPDIPEHPYPPHCIAGSDESKLVPALQWLEDEPNVTLRCKDCIDGFLGSIDKDGSNVFVDWVKTNQIKVILVVGICTDICVLDFVCSALSARTRRILTPLEDVIVYSPACATFDLPLHVAQNIKGALAHPQELMHHVGLYMAKGRGAKVASEVLFDIPVEI	Nicotinamidase 1; Short=AtNIC1; AltName: Full=Nicotinamide deamidase 1	0	18.373	13	2	7	2	1	245	26.9	5.14	107	2	0	2.468	2.234	0.905	1.3	1.16	-0.14	0.000432782	0.00156457	0.955779	0.00282542	0.00519749	1	257.5	635.5	575.3	28.2	17.88	12.39	318.8	331.8	188.9	208	769.6	728.9	554	546.4	639.7	635	521.2	507.2	318.8	294.3
High	CDP18888	pep supercontig:AUK_PRJEB4211_v1:scaffold_300:39269:44450:-1 gene:GSCOC_T00007484001 transcript:CDP18888	MSSVAAGERKVVCVTGASGYIASWLVKLLLERGYTVKASVRDLNDPKKTQHLASLAGAKERLHLFSANLLEEGSFDAIVEGCEGVFHTASPAQLSVSNPEAELLEPAVRGTVNVLQSCAKVSSIKKVVITSSTAAVTINRELKKDVVVDESWFSDPSYCEEQKSWYELSKTLAEDAAWKFAKEHGIEIITIHPGFVVGPVLQPSINLTTELILSLVNGAGAFPNVTLGWVDVRDVAHAHILAFEIPSASGRYCLVERSAHASEVIKILRGHYPTHKFLDKFSDYSNLFYPALTVSNEKAKNLGVRFIPLEVSLKDMIESFREKNLVSI	Phenylacetaldehyde reductase; AltName: Full=2-phenylethanol synthase	0	9.846	11	2	9	1	1	328	35.9	6.68	143	2	0	2.467	1.241	0.503	1.3	0.31	-0.99	9.32188e-05	0.623789	0.00121941	0.0008896	0.883208	0.0160322	206.8	510.2	256.5	12.72	2.05	9	183.8	245.9	197.7	216.2	505.1	495.6	515.4	518.5	226.8	258.2	283.1	254.9	183.8	218.1
High	CDO98788	pep chromosome:AUK_PRJEB4211_v1:3:821313:827403:1 gene:GSCOC_T00025710001 transcript:CDO98788 description:Beta-D-xylosidase 1 [Source:Projected from Arabidopsis thaliana (AT5G49360) UniProtKB/Swiss-Prot;Acc:Q9FGY1]	MAQSQRKCFSFPIIFLLIFLSSYTGGESRPPFACDPNNALSKTFPFCSVSLHIRDRVKDLLGRLTLQEKIRLLVNNAAPVERLGIKGYEWWSEALHGVARSPGVHFGGEFPGATSFPQVITTAASFNASLWEQIGRVVSDEARAMYNGGAAGLSFWSPNVNIFRDPRWGRGQETPGEDPIVASRYATSYVRGLQSPVGNSLKVAACCKHYTAYDLDQWNDVDRFHFNARVNKQDLEDTYNVPFKACVVEGRVASVMCSYNQVNGKPTCADPSLLRGTVRGQWRLDGYIVSDCDSVDTFFNQQHFTPTPEDAVAATIRAGLDLDCGPFLAIFTERAIRAGKVSVALVDGALTNTLHVQMRLGMFDGARQPYLNLGPKDVCTPAHKQLALEAAHQGIVLLQ…	Beta-D-xylosidase 1; Short=AtBXL1; AltName: Full=Alpha-L-arabinofuranosidase; Flags: Precursor	0	18.141	9	4	5	4	1	770	83.7	8.38	101	4	0	2.463	0.594	0.241	1.3	-0.75	-2.05	0.221015	0.736729	0.0248125	0.442122	0.996074	0.148447	217	534.5	128.8	54.13	53.32	26.02	132.9	124.4	356.7	354.3	289.3	338.1	854.8	845	104.1	106.9	174.5	155.2	132.9	110.3
High	CDP01913	pep chromosome:AUK_PRJEB4211_v1:7:7760815:7763604:-1 gene:GSCOC_T00037093001 transcript:CDP01913 description:Peptidyl-prolyl cis-trans isomerase Pin1 [Source:Projected from Arabidopsis thaliana (AT2G18040) UniProtKB/Swiss-Prot;Acc:Q9SL42]	MSSSSSSPDSVRASHILIKHEGSRRKASWKDPEGQIISNTTRDAAVSQLIALRQDIVSAKAKFEDVAARYSDCSSAKRGGDLGSFGRGRMQKPFEQATYALKVGEISDIVDTDSGVHIILRTG	Peptidyl-prolyl cis-trans isomerase Pin1; Short=PPIase Pin1; AltName: Full=MdPin1; AltName: Full=Rotamase Pin1	0	11.299	26	2	4	2	1	123	13.3	9.16	109	2	0	2.46	2.3	0.935	1.3	1.2	-0.1	0.000764918	0.00178058	0.990752	0.00442227	0.00578645	1	208.7	513.4	479.9	8.37	38.86	1.53	192	202.8	233.2	214.7	365.8	360.5	720.6	741.5	478.3	482.9	481.5	466.8	192	179.9
High	CDP00291	pep chromosome:AUK_PRJEB4211_v1:11:30273545:30282664:-1 gene:GSCOC_T00032181001 transcript:CDP00291 description:Alpha-amylase 3, chloroplastic [Source:Projected from Arabidopsis thaliana (AT1G69830) UniProtKB/Swiss-Prot;Acc:Q94A41]	MSAVATELLVHYSLRRRTLVPGIHAYSRRAPPLYLNCTRRPLSAGPSLSSFELKAPKALTLRASASTDTAAVVESDVVFGETFSLKRPVKVEGKITIRLVNGKDEENWQLIVGCSLPGKWVLHWGVKYIGDVGRCSEWDQPPPEMRPPGSIAIKDYAIESPLEKSSTLEGESFYEVKIDFNTNNSITAINFVLKDEDSGSWYQHRGRDFKVPLTEYRHDDGNVVGAKKGFGIWPGAFGQLSNMLLKSEGAENKMDFTSCESKAPPQQNSRLEGFYEEHPIVRETLVDNSVTVSVTQCPETAKNLLYIETDLPGDVIVHWGVCKDKGRKWELPEQPYPSETKVFKNKALRTLLQRKEGGTCSSGSFTLDVGLTAFVFALKLNENTWLNNMGKDFYIPLSS…	Alpha-amylase 3, chloroplastic; Short=AtAMY3; AltName: Full=1,4-alpha-D-glucan glucanohydrolase; Flags: Precursor	0	18.815	7	4	7	4	1	894	100.8	6.7	73	4	0	2.453	1.907	0.778	1.29	0.93	-0.36	0.253287	0.551092	0.973378	0.492706	0.818587	1	295.2	724	563	52.45	41.79	39.35	184	178.2	473.6	490.6	501.5	492.7	1075.3	1045.2	401.6	391.5	821.4	789.4	184	158.1
High	CDP16721	pep chromosome:AUK_PRJEB4211_v1:7:696160:698879:1 gene:GSCOC_T00019194001 transcript:CDP16721	MALKAVHVSDVPSLDHVPGNAASLSPYSPSRFIKGGLETGRSAFKAPAFLVIGHRGNGMNLLQSSDGRMKAIKENSILSFNTASNYPIDYVEFDVQVTGDGFPIIFHDNFILSEQNGMIYERRVTDLSLSEFLGYGPQREDGKVGRSLLRKTKDGRIVSWSVETDDSLCTLEEAFHKVNPRSGFNVELKFDDHVVYQEDQLVQVLQAILRVVFEHARDRPIIFSSFQPDAALLIRKLQSTYPVFFLTNAGTEIYYDVRRNSLEEAVKLCSEGGLQGIVSEVKGIFRNPGAVNKIKDSKLSLLTYGKLNNVPEAVYLQYLMGIEGVIVDVVEKITEAVSNLMRPSKERAEEEEEEAAPEFSQKELSFLLKLIPELIQQ	Glycerophosphodiester phosphodiesterase GDPD1, chloroplastic; AltName: Full=Glycerophosphodiester phosphodiesterase 1; Short=AtGDPD1; AltName: Full=Protein SENESCENCE-RELATED GENE 3; Flags: Precursor	0	9.709	7	2	3	2	1	377	42.1	5.41	58	2	0	2.452	0.484	0.197	1.29	-1.05	-2.34	0.00260521	0.0152009	4.49392e-06	0.0110686	0.0376701	0.000248049	249.2	611.2	120.5	1.31	3.35	6.53	249.9	252.8	248.6	244.9	622.2	638.7	593.8	600.4	124.5	130.1	116.7	112.4	249.9	224.2
High	CDP18988	pep chromosome:AUK_PRJEB4211_v1:11:31583847:31586639:-1 gene:GSCOC_T00001033001 transcript:CDP18988	MLRVAGRKLSSLPWRRPPFAASSASPALFNGPGPFPSSDTSRSSSFHSPSSTFSLTPAFFHQIRGLSSDSLASAHDIGLVQDLPATVAAIKNPSAKIVYDECNHERYLPGDPSKRAFAYFVLTGGRFVYASLIRLLILKFVLSMSASKDVLALASLEVDLSSIEPGTTVTVKWRGKPVFIRHRTEDDIKLANSIDVGSLRDPQEDALRVKKPEWLVVIGVCTHLGCIPLPNAGDFGGWFCPCHGSHYDISGRIRKGPAPYNLEVPTYTFLDENKLLIG	Cytochrome b-c1 complex subunit Rieske-2, mitochondrial; AltName: Full=Complex III subunit 5-2; AltName: Full=Rieske iron-sulfur protein 2; Short=RISP2; AltName: Full=Ubiquinol-cytochrome c reductase iron-sulfur subunit 2; Flags: Precursor	0	19.376	18	5	11	5	1	278	30.3	8.73	148	5	0	2.45	2.78	1.135	1.29	1.47	0.18	0.0170202	0.00554939	0.97636	0.0524121	0.0154049	1	651.8	1597	1811.9	15.11	10.68	9.27	587.7	561.2	723	763.9	1489.5	1382.7	1712.2	1723.5	1706.2	1630	1978	1924.1	587.7	497.8
High	CDP19519	pep supercontig:AUK_PRJEB4211_v1:scaffold_526:23934:27316:1 gene:GSCOC_T00008386001 transcript:CDP19519	MGALTAALIAIAGVALGWITIEIACKPCLEKGREAIDRNLNPDYDPDDHDEAIRAPLEPKSMQHSEHPSSTSTPVKAI	---NA---	0	5.792	28	1	2	1	1	78	8.4	5.08	34	1	0	2.443	2.249	0.921	1.29	1.17	-0.12	0.0535586	0.0724533	0.999794	0.13836	0.147707	1	152.4	372.3	342.8	14.67	35.28	43.29	127.7	141.9	178.1	163.7	282.9	243.4	494.5	490	232.9	229.4	504.4	512.4	127.7	125.9
High	CDP08198	pep chromosome:AUK_PRJEB4211_v1:8:24794992:24803345:1 gene:GSCOC_T00026956001 transcript:CDP08198	MKVVAGPGGYILQDVPHLTDYIPDLPTHPNPLRSNPAYSVVKQYFVHMDDTVPQKVVVHKDSPRGIHFRRAGPRQKVYFKSDDVSACIVTCGGLCPGLNTVIREIVHSLDYMYGVNKVLGIDGGYRGFYSKNTIRLTPKTVNDIHKRGGTILGTSRGGHDTSKIVDSIQDRGINQVYIIGGDGTQKGAAAIYKEVRSRGLKVAVAGIPKTIDNDIPVIDRSFGFDTAVEEAQRAINAAHVEAESAENGIGVVKLMGRYCGFIAQYATLASRDVDCCLIPESPFYLEGKGGLFEFVEKCLKENGHMVIVIAEGAGQELLAESGHANDEQDASGNKLLQDVGLWISQKIKDYFAKQRKMAITLKYIDPTYMIRAIPSNASDNVYCTLLAQSAVHGAMAGYT…	ATP-dependent 6-phosphofructokinase 7; Short=ATP-PFK 7; Short=Phosphofructokinase 7; AltName: Full=Phosphohexokinase 7	0	52.699	27	9	16	8	1	486	53	7.2	336	9	1	2.435	2.467	1.013	1.28	1.3	0.02	1.60938e-11	1.25852e-11	0.995574	9.79106e-09	1.17101e-09	1	611	1487.6	1507.6	1.77	1.95	0.57	605.9	616.1	593.7	616.3	1515.2	1509.7	1459.6	1465.8	1505	1523.7	1508	1507.2	605.9	546.5
High	CDP06414	pep chromosome:AUK_PRJEB4211_v1:6:527217:539174:1 gene:GSCOC_T00023252001 transcript:CDP06414	MAAHSLSPLNLRHLSPQLPAATLPSSSSLLLLRRSLRLNFALPNAASGQSPCCQAPAPVVRASVRTQPLGETKIDDENNNILRVGVICGGPSAERGISLNSARSVLDHIQGDDLQVSCYYIDYNLNAYAISSAQMYSNTPADFDFKLDSLAQGFESLSEFARHLAATVDIVFPVIHGRFGEDGGIQELLEKFNIPFVGTQSRECRKAFDKYDASLELERQGFVTAPSVLVQGSEMDETDLSKWFARYQLDTEQGKVVVKPTRAGSSIGVTVAYGVTDTLQKANAIISEGIDDKVLVEIFLEGGSEFTAIVLDVGCDLNCQPVVLLPTEVELQSYGNIDVSDQDAIFNYRRKYLPTRQVTYHTPPRFPLDVIKTIREGASLLFKQLGLRDFARIDGWFLP…	---NA---	0	40.283	14	9	13	9	1	957	105.1	5.87	208	9	0	2.425	2.177	0.898	1.28	1.12	-0.16	9.20629e-05	0.000411121	0.912558	0.000882897	0.00173657	1	478.3	1160	1041.2	14.67	12.68	16.87	413.8	424	539.6	541.5	1033.3	1041.2	1293.9	1292.3	923.2	861	1174.3	1210.3	413.8	376.1
High	CDP16945	pep chromosome:AUK_PRJEB4211_v1:4:13623058:13623657:-1 gene:GSCOC_T00005310001 transcript:CDP16945	MDEISTKMKTIQLIAILWWVVAMMAMPILAHGSIDQSPEAVKKWFKELGHAKEKLTELHFYVHDTVTGKNPSAILVAQANTTSKSPTMFGATFVFDDPMTVGPEPSSKVIGRAHGVYSSVSKKDASLIVILNLAFNDGQFKGSTLSVLGSYPLSQKYKEMPILGGSGAFRLARGIVTATAIATNGLNEIIEFHVLVLHY	Dirigent protein 2; Short=AtDIR2; Flags: Precursor	0	5.617	15	2	2	2	1	199	21.6	8.79	14	2	0	2.423	1.928	0.796	1.28	0.95	-0.33	0.32553	0.580722	0.988509	0.605525	0.841861	1	49.5	120	95.4	76.4	25.74	37.87	22	22.8	111.9	107.6	102.1	87.5	153	140.9	68.5	67.5	135.8	132.9	22	20.2
High	CDP15565	pep chromosome:AUK_PRJEB4211_v1:1:25884661:25891630:1 gene:GSCOC_T00015454001 transcript:CDP15565	MGKGEKTGLGRALVKHHNQMIQDSKEKGRFYRGQNKKVLESVTDVSDIDAVIEQADEAHRFFSDNNPPVNVLINLDSSSSTTVFGFHAGMPPWNSKMSVEELDANERQAFLAWRRSLARLEENEKLVLTPFEKNLDIWRQLWRVVERSDLLVMVVDARDPLFYRCPDLEAYAQEVDQHKRTLLLVNKADLLPLSVREKWATYFRLHGILFIFWSAKAAYAALEGKKISSSSRMQNEQLESVDFETKIYGREELLARLQSEAEEIVSMRNGSAPNNSSPSYDYSSEENLFENTVSKCVIVGFVGYPNVGKSSTINALVGEKRTGVTSTPGKTKHFQTLIISEKLTLCDCPGLVFPSFTSSRYEMIASGVLPIDRMTEHREAVQVVANRVPRQMIEDVYNI…	---NA---	0	10.108	4	1	2	1	1	561	63.1	6.86	148	1	0	2.42	1.838	0.759	1.28	0.88	-0.4	0.0036296	0.0365852	0.752957	0.0142807	0.0809783	1	72	174.2	132.3	29.7	22.66	24.3	47.9	64.5	80.4	98.4	152.3	133.1	199.3	218.7	108.6	112.1	177.2	156.1	47.9	57.2
High	CDP15340	pep chromosome:AUK_PRJEB4211_v1:6:3935212:3942825:-1 gene:GSCOC_T00043031001 transcript:CDP15340	MVSNHLLLEEPIRMASILEPSKSSFFPAMTKIVGTLGPRSRSVEVISGCLQAGMSVARFDFSWGDKDYHQETLENLRAAVKTTKKLCAVMLDTVGPELQVVNKSENAISLKADATVILTPDQGQEATSEVLPINFAGLSKAVKKGDTIFIGQYLFTGSETTSVWLEVDKVNGDDVVCVIKNTATLTGALFTLHASQIRIDLPTLTDKDKEVISTWGVQNKIDFLSLSYTRHAEDVREAREILSKLGDLSQTQIFAKIENVEGLTHFDEILQEADGIILSRGNLGIDLPPEKVFLFQKAAVNKCNMAGKPAVVTRVVDSMTDNLRPTRAEATDVANAVLDGTDAILLGAETLRGLYPVETISIVGKICAEAEKVFNQDLYFKKTVKYVGEPMTHLESIAS…	Pyruvate kinase 2, cytosolic; Short=OsPK2	0	116.307	41	16	59	6	1	527	57.3	6.8	1150	16	0	2.416	2.627	1.087	1.27	1.39	0.12	0.00189539	0.000771576	0.988378	0.00853761	0.00288588	1	845.5	2042.9	2221.4	15.75	16.98	18.7	930.4	1015	727	768.4	2338.9	2341.9	1701.5	1784.3	2573.8	2604.9	1823.8	1917.3	930.4	900.3
High	CDO99108	pep chromosome:AUK_PRJEB4211_v1:3:3249246:3253481:1 gene:GSCOC_T00026137001 transcript:CDO99108	MGSLTKDDREEVIQAWYMDDSDEDQRLPHHREPKEFVSLDKLAELGVLSWRLDADKYENDEELKKIRDARGYSYMDFCEVCPEKLPNYEEKIKNFFEEHLHTDEEIRYCVAGSGYFDARDRNDEWIRIWVKKGAMIVLPAGIYHRFTLDSDNYIKAMRLFVGDPVWTPFNRPHDHLPARKAYVETFGQKEAAGQAVDAAA	1,2-dihydroxy-3-keto-5-methylthiopentene dioxygenase 2; AltName: Full=Acireductone dioxygenase (Fe(2+)-requiring) 2; Short=ARD 2; Short=Fe-ARD 2	0	27.871	43	7	12	7	1	200	23.5	5.15	200	7	0	2.411	3.297	1.368	1.27	1.72	0.45	0.281677	0.0853627	0.943938	0.536354	0.169847	1	647.3	1560.4	2134.4	54.72	56.85	52.28	390.3	384.9	1097.3	1073.6	906.9	914.9	2661.4	2693	1334.1	1285.5	3414.8	3532.8	390.3	341.4
High	CDP15102	pep chromosome:AUK_PRJEB4211_v1:3:10924578:10928790:-1 gene:GSCOC_T00042674001 transcript:CDP15102	MAAAVATDVVTRNGHSCCSEKGPGYASPLEAMSGPRECLIYVTCVYTGTGKEKPDYLATVDVDPSSPTYSKVIHRLPMPYVGDELHHSGWNACSSCHGDPSAARRFLVLPSLISGRIYAVDTKEDPKAPALHKVVEREDIIQKTGLAFPHTAHCLASGDIMVSCLGDKDGNAKGNGFLLLDSEFNVKGRWDKPGHSPLYGYDFWYQPRHKTMISTSWGAPAAFTKGFNLQHVADGLYGRHLHVYSWPDCELKQTLDLGNTGLIPLEIRFLHDPSKDTGFVGCALTSNMVRFFKNPDDTWSHEVSISVKPVKVQNWILPEMPGLITDFLISLDDRFLYLANWLHGDVRQYNIEDPKNPKLTGQIWVGGLFRKGRPVVAEAEDGTTYQVDVPEIQGNQLRG…	Selenium-binding protein 1; Short=AtSBP1	0	49.966	30	11	18	11	1	486	53.8	6.1	459	11	0	2.411	1.852	0.768	1.27	0.89	-0.38	0.00105894	0.0185583	0.584605	0.00534936	0.0446659	1	1180.1	2845.2	2185.7	22.03	24.34	16	1398.9	1439	937.5	995.5	3591.5	3425.4	2363.2	2226.5	2489	2546.3	1919.2	1893.1	1398.9	1276.4
High	CDO97236	pep chromosome:AUK_PRJEB4211_v1:2:17503973:17510987:1 gene:GSCOC_T00014506001 transcript:CDO97236 description:Alpha-L-fucosidase 2 [Source:Projected from Arabidopsis thaliana (AT4G34260) UniProtKB/Swiss-Prot;Acc:Q8L7W8]	MEEGHRWVLVKKPCDRDAWSPTLSSSNTGSNSGSGPLKIRFNEPAKYWTDALPIGNGRLGAMVWGGVPAEVLNLNEDTLWTGIPGDYTDPNAPEALAEVRKLVNEGQYAEATSAAAQLSGEPSEVYQPLGDVKIEFDDSHTKYDKESYHRELDLDTATVTVRYSVDEVEFTREYFVSYPDQAIVVKISGNKPGRLNFTASLDSELHHRSYANGKSQIAMQGSCPGKGIASESLEDDDYPEGIQFSAFLDLQISGSMGTLHVLDGKKLHVEGCDWAIIMLSASSSFDGPFINPSDSQRDPSSEALSTLNSIKRFSYSEVYSRHVSDYQNFFHSVSLQLSKSSKSSIGNGCNLTNNCLAGGQKQSISTADRVKAFKTDEDPSLVELLFQFGRYLLISSSRP…	Alpha-L-fucosidase 2; AltName: Full=Alpha-1,2-fucosidase 2; AltName: Full=Alpha-L-fucosidase 95A; Short=AtFuc95A; AltName: Full=Alpha-L-fucoside fucohydrolase 2; AltName: Full=Protein ALTERED XYLOGLUCAN 8; Flags: Precursor	0	50.407	20	10	32	10	1	837	92.9	5.64	534	10	0	2.407	0.801	0.333	1.27	-0.32	-1.59	0.0317358	0.903184	0.00590324	0.0884134	1	0.0525718	1847.4	4447.1	1479.8	19.5	20.18	22.39	1557.7	1562.1	2202.2	2184.8	3772.1	3627.9	5281.8	5243	1237	1186.7	1814.4	1770.3	1557.7	1385.6
High	CDP18960	pep supercontig:AUK_PRJEB4211_v1:scaffold_319:129950:154020:-1 gene:GSCOC_T00000787001 transcript:CDP18960	MESLAQLEVLCERLYNSQDSAERAHAENTLKCFSVNADYIPQCQFILDNALTPYALMLASSSLLKQVTEHSLSLQLRLDIRNYLVNYLANRGPELQSFVVGSLIQLLCRITKFGWFDDDKFRDVVKESISFLSQATPEHYAIGLKILNQLVCEMNQPNPGLPSTHHRRVACSFRDLSLFQIFHISITSLHQLKSDVISRLQELALSLSLKCLSFDFVGTSVDESADEFGTVQIPLSWKPVLEDFSTVQIFFDYYTIAKPPISKEALECLVRLASVRRSLFTTDVTRSKYLAHLMTGTKEILRSGTGLGDHDNYHEFCRLLGRFRINYQLSELVNMEGYSEWIRLVAEFTSKSLQSWQWASTSVYYLLGLWSRLVSSVPYLKADAPSLLDEFVPKITEGY…	---NA---	0	5.444	5	2	4	2	1	1059	120	6.48	0	2	0	2.405	2.142	0.891	1.27	1.1	-0.17	0.482893	0.594014	0.999649	0.810988	0.852431	1	92.8	223.2	198.8	84.29	37.53	57.08	214	215	27	40.2	320.5	304.7	163.5	155.7	353.9	330.8	119.5	113.1	214	190.7
High	CDP11459	pep chromosome:AUK_PRJEB4211_v1:10:26390324:26391281:-1 gene:GSCOC_T00033723001 transcript:CDP11459	MAGEGVKLLGYWASPFALRVRSALKLKGIEYEYQEEDLGNKSPLLLQGNPVYKKVPVLLHKGKSISESLVILEYIDEVWKHNPLLPEDPYERARSRFWAKFVDEKCVPALVGVITKVGEELEKSAREAREHLKTLESGLDGKRCFGGTKIGFADVAIAWIAYWVRMEQEAFKIQLIDQQNMPLLAAWIDYVLEDPVMKEFMPPYDKLVKHTRDLREKLTAVVSN	Glutathione transferase GST 23; AltName: Full=Glutathione transferase GST 36	0	38.296	32	7	21	1	1	224	25.6	6.95	246	7	0	2.395	2.507	1.047	1.26	1.33	0.07	0.00566367	0.00293306	0.979503	0.0208117	0.0088793	1	16.2	38.8	40.6	42.25	13.78	23.79	17.4	26.4	15.1	9.1	40.9	45	36.8	32.6	42.7	56.6	32.7	38.6	17.4	23.4
High	CDP10541	pep chromosome:AUK_PRJEB4211_v1:6:5714157:5717603:-1 gene:GSCOC_T00031299001 transcript:CDP10541	MVLGIKLLYRYRARALSWKLQYVLFNITSCVGFEIIWSNCVRTTLVDSNNSVLYVKVLNPIKQRMEKDVDEVGKITRVIKSKIEELDRENLSNRQKPGCGKGSAVDRSRTATTVSLKKKFKDKMTEFQNLRESIHQEHREVVERRVFTVTGNRADEETIDKLIETGDSEQIFQKAVQDQGRGQIMDTLAEIQERHDAVRELERKLLELQQIFLDMAVLVDAQGDLLDNIETHVSNAVDHVQSGNVALQKAKTLQRNSRKWMCIAILILLIIVAIIVVGVLKPWQNNNKGA	---NA---	0	10.554	10	2	5	2	1	290	33.1	8.94	27	2	0	2.381	2.045	0.859	1.25	1.03	-0.22	0.0418676	0.114578	0.977736	0.111532	0.217553	1	268.1	638.5	548.3	37.24	26.39	25.56	197.8	195.6	363.5	399.3	497.5	509.7	799.9	803.7	433	441.7	680.8	690.7	197.8	173.5
High	CDO98860	pep chromosome:AUK_PRJEB4211_v1:3:1339229:1342471:1 gene:GSCOC_T00025805001 transcript:CDO98860 description:Translationally-controlled tumor protein 1 [Source:Projected from Arabidopsis thaliana (AT3G16640) UniProtKB/Swiss-Prot;Acc:P31265]	MLVYQDLLTGDELLSDSFPYKEIENGILWEVEGKWVVQGAVEVDIGANPSAEGCGEDEGVDDQAVKVVDIVDTFRLQEQPPFDKKQFVAYIKKYIKLLTPKIDAEKQEHFKKNIEGATKYLLSKLSDLQFFVGESMADDSTLVFAYYKDGATDPTFLYFGVGLKEVKC	Translationally-controlled tumor protein homolog; Short=TCTP	0	57.871	45	5	47	3	1	168	18.9	4.6	558	5	3	2.379	2.378	1	1.25	1.25	0	0.000930808	0.000846262	0.999998	0.00509875	0.00312844	1	857.7	2040.6	2039.9	19.1	27.12	24.24	710.2	734.8	1001.1	1015.2	1649.5	1527.4	2524.4	2590.2	1626	1658.1	2518.7	2509.5	710.2	651.8
High	CDP10297	pep chromosome:AUK_PRJEB4211_v1:3:12315678:12321845:-1 gene:GSCOC_T00030977001 transcript:CDP10297	MAASVKVPRIKLGSQGLVVSAQGLGCMGMSAFYGAPKPEPDMIKLIHHAISRGITHLDTSDLYGPHTNEILIGKALKEGIRAKVELATKFAVNLQDGKFDVRGDPAYVRASCEASLKRLDVDCIDLYYQHRIDTRVPIEVTIGELKKLVEEGKIKYIGLSEASASTIRRAHAVHPITAVQLEWSLWTRDVEEEIIPTCRELGIGIVAYSPLGRGFFSSGPKLVENFTEGDARKNMPRFQAENLEHNKNLYEQVNGIASRKGCTPSQLALAWVHHQGKDVCPIPGTTKIENLNQNIGALSVKLSAEDMAELESIASAIKGERYASVAGTWKTADTPPLSTWKCT	Probable aldo-keto reductase 2	0	110.825	52	19	74	4	1	343	37.5	7.74	1134	19	1	2.378	4.195	1.764	1.25	2.07	0.82	0.0535422	0.00121828	0.324703	0.138354	0.00420873	0.89549	306.1	728	1284.2	44.11	42.37	40.11	196.8	210.6	464.1	445.1	508.6	485	1098.1	1042	886.7	898.3	1848.7	1835.8	196.8	186.8
High	CDP13669	pep chromosome:AUK_PRJEB4211_v1:5:28301760:28309262:1 gene:GSCOC_T00038694001 transcript:CDP13669	MGSKPVEDLIEASSGVHFSGFHLDGLISSTSEVEQPTTSAEDVHKQPFVIGVAGGAASGKTTVCDMIIEQLHDQRVVLVNQDSFYYNLTPEELTRVQEYNFDHPDAFDTEQLLCAMEKLKHGQAVDIPKYDFKSYKNDIFPRRRVNPSDVIILEGILIFHDPRVRDLMSMKIFVDTDADVRLARRIRRDTAEKGRDIGMVLDQYSKFVKPAFDDFILPTKKYADIIIPRGGDNPVAIDLIVQHIRTKLGQHDLCKIYPNLYVIHSTFQIRGMHTLIRDSQTTKHDFVFYADRLIRLVVEHGLGHLPFTEKQVITPTGSVYTGVDFCKRLCGVSVIRSGESMENALRACCKGIKIGKILIHREGDNGQQLIYEKLPQDILNRHVLLLDPILGTGNSAVQA…	Uridine kinase-like protein 1, chloroplastic; Includes: Uridine kinase; Short=UK; Includes: Putative uracil phosphoribosyltransferase; Short=UPRTase; AltName: Full=UMP pyrophosphorylase; Flags: Precursor	0	13.188	11	4	7	3	1	469	52.7	6.67	143	4	1	2.378	2.758	1.16	1.25	1.46	0.21	1.59771e-06	2.32057e-07	0.608958	5.18737e-05	3.78938e-06	1	343.5	816.7	947.4	15.91	14.94	13.15	376.8	419.4	313.1	299.6	962.8	916.5	727.8	725.2	1078.3	1046.1	858	835.1	376.8	372
High	CDO97035	pep chromosome:AUK_PRJEB4211_v1:2:16038840:16041211:-1 gene:GSCOC_T00014251001 transcript:CDO97035	MTNNSSKKSKILIIGVTGSLGFDLAKASVGASHPTFGLVRDSAFSDPNKSEKLQFLSNAGVTLLKGSLQDEDSLIEAIKKVDVVICSIPSQHVLDQKLLIQAIKLAGCIKRFIPSEFGLDPDKTQVADLDYSFYSKKAEIRRLIEAEHIPYTYICCNFFMRFLLPSLVQPGLKSPPRDKATIYGDGTIKGVFVKESDVAAFTVCTVDDPRSLNKALYLRPPGNVYSMNELMEIWETKIGKELQKTCITEQELLEKIKETPYPDCMEMVFIYSAFVKGDQTHYDIESSNGVEGSQLYPQVTYTTISDYLDTLL	---NA---	0	7.038	5	1	2	1	1	312	34.7	5.59	41	1	0	2.376	2.156	0.907	1.25	1.11	-0.14	0.825624	0.892848	0.999838	1	1	1	42.4	100.7	91.4	82.21	79.34	91.66	18.2	19.1	94.3	117	42	45	225.6	241.3	28.6	31.8	262.5	262.9	18.2	16.9
High	CDP03328	pep chromosome:AUK_PRJEB4211_v1:6:7892113:7893951:1 gene:GSCOC_T00041873001 transcript:CDP03328	MLKHWALSSYKIFLVADFGLAKFSSDVNTHVSTRVMGTFGYLAPEYASSGKLTDKSDVFSFGVVLLELITGRRPVDSNQSFMDDSLVDWARPLLTRALDDENFDQLTDARLQNGYNKNEMARVAACAAACVRHSARRRPRMSQVVRALEGDVSLSDLNEGIRPGHSTVYSSYGSSDYDTAQYNEDMKKFRKMALQSKEYGSSEYSGPTSEYGLYPSGSSSEGQTTREMETGKLKKDSRGFSGGS	Proline-rich receptor-like protein kinase PERK1; AltName: Full=Proline-rich extensin-like receptor kinase 1; Short=AtPERK1	0.002	2.709	6	1	2	1	1	244	27	6.95	28	1	0	2.376	2.046	0.861	1.25	1.03	-0.22	0.0128025	0.0553431	0.935965	0.041333	0.117085	1	72.8	173	149	2.4	22.48	17.57	73	72.3	72.6	76.1	141.5	143.5	208.6	213.8	119.3	131.9	170.8	168.3	73	64.1
High	CDP13915	pep chromosome:AUK_PRJEB4211_v1:2:4317543:4320903:1 gene:GSCOC_T00039055001 transcript:CDP13915 description:Superoxide dismutase [Mn] 1, mitochondrial [Source:Projected from Arabidopsis thaliana (AT3G10920) UniProtKB/Swiss-Prot;Acc:O81235]	MALRTLVTRKALGNSVAFRQQLRGLQTHTLPDLPYDYGALEPAISGEIMQLHHQKHHQTYVTNFNKALEQLDDAINKGDSPTVVKLQSAIKFNGGGHINHSIFWKNLAPVREGGGEPPKGSLGWAIDNHFGSLEALVQKMNADGAGLQGSGWVWLGLDKEMKRLVVETTANQDPLVTKGSSLVPLLGIDVWEHAYYLQYKNVRPDYLKNIWKVINWKYASDIYEKECP	Superoxide dismutase [Mn], mitochondrial; Flags: Precursor	0	53.55	42	7	17	7	1	228	25.5	8.12	336	7	0	2.36	1.712	0.725	1.24	0.78	-0.46	0.00483995	0.0985455	0.52637	0.0180992	0.191544	1	2158.3	5093.8	3695.2	18.9	17.85	16.9	1891	1772.7	2605.1	2463.5	4431.4	4257.3	5993.4	5855.3	3170.4	3212.9	4250	4318.1	1891	1572.4
High	Q9ZSQ4	Phosphoglucomutase, cytoplasmic OS=Populus tremula OX=113636 GN=PGM1 PE=2 SV=1	MVLFNVSRVETTPFGDQKPGTSGLRKKVKVFKQPNYLQNFVQSTFNALTPQNVRGATLVVSGDGRYFSKDAIQIITKMAAGNGLRRVWVGQNGLLSTPAVSAVIRERVGVDGSKATGAFILTASHNPGGPNEDFGIKYNMENGGPAPEGITDKIYENTKTIKEYLTADLPDVDITTIGVTSFSGSEGQFDVEVFDSASDYIKLMKSIFDFESIRKLLSSPKFTFCYDALHGVAGAYAKRIFVEELGAQESSLLNCVPKEDFGGGHPDPNLTYAKELVARMGLGKSNSEVEPPEFGAAADGDADRNMVLGKRFFVTPSDSVAIIAANAVEAIPYFSAGLKGVARSMPTSAALDVVAKSLNLKFFEVPTGWKFFGNLMDAGLCSVCGEESFGTGSDHIREK…	Phosphoglucomutase, cytoplasmic; Short=PGM; AltName: Full=Glucose phosphomutase	0	30.647	10	6	13	3	1	582	63.1	5.72	159	6	0	2.353	2.1	0.893	1.23	1.07	-0.16	0.0333859	0.0692651	0.994485	0.0921401	0.142	1	365.1	859.1	766.8	17.94	39.72	38.91	422.4	436.6	315.5	313.3	1206.4	1219.1	573.1	611.8	1115.1	1062.9	529.2	553.1	422.4	387.3
High	CDO99412	pep chromosome:AUK_PRJEB4211_v1:3:6589128:6597624:1 gene:GSCOC_T00026576001 transcript:CDO99412	MQAALLTPPTTPTPSPFKTHIPKFNLLPKRVPNFTIQASTTQTAQPPLPPQTTDLSEKLNKYSSRITEPKSQGGSQAVLYGVGLTDDDLHKPQIGISSVWYEGNTCNMHLLKLAEAVKEGVKEAGMVGFRFNTIGVSDAISMGTRGMCYSLQSRDLIADSIETVMAAQWYDGNISIPGCDKNMPGTIMAMGRLNRPSIMVYGGTIKPGHFQGHTYDIVSAFQAYGEYVSGSVSDEQRMNVVRNSCPGAGACGGMYTANTMASAIETMGMSLPYSSSTPAEDPLKLDECRLAGKYLLDLIKMDLKPRDIITPKSLHNAIVMVMALGGSTNAVLHLIAIARSVGLQLTLDDFQKVSDKVPFLADLKPSGKYVMEDVHRIGGTPAIIRYLLELGFLDGDCIT…	Dihydroxy-acid dehydratase, chloroplastic; Short=AtDHAD; Short=DAD; Flags: Precursor	0	40.838	19	8	19	3	1	616	66.3	6.9	200	8	4	2.353	1.931	0.82	1.23	0.95	-0.29	0.000295885	0.00425011	0.625126	0.00210018	0.012257	1	675.5	1589.6	1304	7.87	4.9	4.89	621.5	646.4	705.8	737.9	1736.6	1600.8	1563.3	1578.5	1248.3	1257.9	1351.9	1373.2	621.5	573.4
High	CDP05954	pep chromosome:AUK_PRJEB4211_v1:5:25742233:25745949:-1 gene:GSCOC_T00021281001 transcript:CDP05954	MATTAPSSDQNPEVENGEEFEVHVFSSEAELLEKLQDKWRSVKPQPYPAMYSSVFGGIILDPALMVIPMDDHMVHRGHGVFDTAIILGGHLYELDVHLTRFLKSASKAKIVSPFPKSTLRSILIQLAAASQCRKGTLRYWLSAGPGDFLLSPAGCPKSAFYAIVIDEDFEQCKEGVKVITSTIPMKTPLFATMKNVNYMPNVLSKMEAEEQGAFASIWVDEEGYIAEGPNVNVGFITHDKELILPEFDKILRGCTAARLLELAPKLVEQHRLKSVRTDNLTIEEAKNAAEMMYIGSTLPVLPIIAWDEKPIGDGKVGELTMALSDLVWEDMVAGPKTRRIPVPYV	---NA---	0	17.773	20	4	7	4	1	345	38.2	5.36	133	4	0	2.348	3.901	1.661	1.23	1.96	0.73	0.0165478	0.000310916	0.272547	0.0511354	0.00138445	0.79665	215.9	506.9	842.1	12.79	1.93	49.41	248.3	237.7	194.1	196.1	507.5	523.9	501.2	506.3	1308.9	1308	542.1	506.9	248.3	210.8
High	CDO99529	pep chromosome:AUK_PRJEB4211_v1:2:11642396:11644151:1 gene:GSCOC_T00029145001 transcript:CDO99529	MLLLISSSVFADQHEHSKWPAHPPAEAPEHHKGHHHHHHHHHPPTYPPVKPPVHPPVKPPVHPPVKPPVHPPVYPPVKPPVHPPVKPPVHPPVKPPVHPPVKPPVHPPVKPPVKPPVYPPVKPPVHPPVRKLVAVQGVVYCKTCSYAGFNPKAAVPLQGAVVRVRCHNTRFKPVVAEGRTDKNGYFLIVPEMVTSVAASTCKAYLVKSPSMKCSAPTNLNYGSTGAGLMPNPAHKPNPLAPKYALYNVGPFAFGPAKLTPCHR	Non-classical arabinogalactan protein 30; Short=AtAGP30; Flags: Precursor	0	69.366	29	7	44	7	1	263	28.5	9.94	1001	7	0	2.347	1.272	0.542	1.23	0.35	-0.88	0.274918	0.96136	0.62234	0.525026	1	1	4601.5	10800.9	5853	57.72	62.66	64.81	7660.4	7674.4	2359.7	2764	20379.3	19621.5	5945.4	5927.9	10872.1	11341.2	3100.8	3151	7660.4	6807.3
High	CDO97146	pep chromosome:AUK_PRJEB4211_v1:2:16815491:16821261:1 gene:GSCOC_T00014395001 transcript:CDO97146 description:Peptidyl-prolyl cis-trans isomerase CYP40 [Source:Projected from Arabidopsis thaliana (AT2G15790) UniProtKB/Swiss-Prot;Acc:Q9C566]	MERPRCFLDISIGGELEGRIVVELYNDIVPKTAENFRALCTGEKGIGPHTAVPLHYKGSRFHRVIKSFMVQGGDISAGDGTGGESIYGLKFEDENFDLKHERKGMLSMANAGPNTNGSQFFITTTRTSHLDGKHVVFGKVVKGMGVVRSIEHVTTGENDCPTLDVIIVDCGQIQEGADDGIANFFKDGDEYADWPADLDNCSGELSWWMTAVDSIKFHGNDYFKKQDYKMALRKYRKALRYLDVCWEKDGIDEDKSMHLRKMKSQIFTNSSACKLKLGDSKGALLDADFAMRDGENNAKALFRQGQAHVALNDIDAAVESFKKALNLEPNDGAIKKELAAAKKRIADRRDQERKAFARMFQ	---NA---	0	10.919	5	2	4	1	1	361	40.2	6.86	59	2	0	2.341	5.418	2.315	1.23	2.44	1.21	0.696858	0.118403	0.678969	1	0.223504	1	138.1	323.3	748.3	79.16	74.57	72.36	60.3	60.4	330.2	315.8	140.1	155.7	700.6	671.3	364.8	344.7	1554.6	1535.1	60.3	53.6
High	CDP11143	pep chromosome:AUK_PRJEB4211_v1:3:7825370:7833202:1 gene:GSCOC_T00033200001 transcript:CDP11143	MGDLENSGKNNPPQNVKLPIPGKRNILITSALPYVNNVPHLGNIIGCVLSADVFARYCRLRGYNVIYICGTDEYGTATENKALEEGVTPQEICDKYHAIHKSIYEWFDISFDKFGRTSSPEQTKVCQAIFKKLLENNWLSENTMQQLFCDTCQRFLADRFVEGSCPHCNYDSARGDQCENCGKLLNPTELLDPKCKVCKSAPHIRDTDHLFLELPLLKDKLEAYINEMSVAGGWSQNAIQATNAWLREGLKPRCITRDLKWGVPVPHEKYKDKVFYVWFDAPIGYVSITACYTTEWEKWWKNPEEVELFQFMGKDNVPFHTVMFPSTLLGTGENWTLMKTISVTEYLNYESGKFSKSKGIGVFGNDAKDTNIPIEVWRYYLLTNRPEVSDALFTWDDLR…	---NA---	0	28.569	9	7	9	7	1	949	106.6	6.71	122	7	0	2.336	2.79	1.195	1.22	1.48	0.26	0.226301	0.110552	0.991909	0.450104	0.210335	1	520.1	1214.8	1451.3	45.71	45.45	43.44	762.5	854.6	351.7	354.8	1873.7	1829.1	805	806.9	2149.2	2115.5	995.6	938.8	762.5	758
High	CDP15935	pep chromosome:AUK_PRJEB4211_v1:5:22957969:22966210:-1 gene:GSCOC_T00016854001 transcript:CDP15935	MATRNIEKMASIDAQLRLLAPGKVSEDDKLVEYDALLLDRFLDIFQDLHGEEIRETVQDCYELSAEYERKRDPQKLDELGRMLTSLDAGDSIVVAKSFSNMLNLANLAEEVQIAYRRRSKLKKRDFSDEASATTESDIEETLKRLVGQLKKSPEEVFDALKNQTVDLVLTAHPTQSVRRSLLQKHARIRNCLTQLYAKDITPDEKQELDEALQREIRAAFRTDEIRRNPPTPQDEMRAGMSYFHETIWKGVPKFLRRVDTALKNIGINERVPYNAPVIQFSSWMGGDRDGNPRVTPEVTRDVCLLARMMAANLYFSQIEDLMFELSMWRCSEELRARADELHRSSRRDAKHFIEFWKQIPPNEPYRVILGDVRDKLYNTRERARQLLATGISDIPEEAA…	---NA---	0	108.805	24	16	38	11	1	968	110.6	6.47	698	16	4	2.336	1.625	0.696	1.22	0.7	-0.52	2.33588e-05	0.006519	0.0466572	0.000320246	0.0178009	0.232711	1697.8	3965.8	2759.4	17.44	11.96	13.21	1399.6	1485.4	1940.5	1962	3634.6	3507.4	4444.5	4327.1	2400.5	2481.3	3068.8	3068.6	1399.6	1317.6
High	CDP00611	pep chromosome:AUK_PRJEB4211_v1:11:27618301:27624324:-1 gene:GSCOC_T00032605001 transcript:CDP00611	MLFSRSSFFSFILPLFLVTLLSIARVDVVSTAPTKIGQGYSLISVEESPDGGIVGLLQVKQKNNVYGPDIPYLQLYVKHETENRLRVHITDAQKERWEVPYDLIPREKPAALKKAIAWSRKNQNSVLMASSEYESNELIFAFTTDPFSFAVKRKSDGQTLFNSSSDESDPYSPLVFKDQYLEISTKLPQDASLYGLGENTQPHGIKLYPGDPYTLFTTDVAAINLNTDLYGSHPVYMDLRNVNREAFAHAVLLLNSNGMDVFYAGTSLTYKVIGGVLDFYFFSGPTPLDVVDQYTSFIGRPAPMPYWAFGFHQCRWGYHNLSVVEDVVENYQKAKIPLDVIWNDDDHMDGHKDFTLNPVNYPRPKLLAFLEKIHARGMKYVVIIDPGIGVNNSYGVYQR…	Alpha-xylosidase 1; Flags: Precursor	0	72.085	20	14	37	13	1	921	103.3	6.3	382	14	1	2.326	0.834	0.359	1.22	-0.26	-1.48	0.0734348	0.962121	0.021271	0.180543	1	0.1342	3089.5	7185.9	2577.2	34.27	41.43	36.18	2254.9	2289.8	4210.5	4168.6	5053.8	4738.5	10507.9	10217.4	1793	1893.2	3508.5	3536.6	2254.9	2031.1
High	CDP11240	pep chromosome:AUK_PRJEB4211_v1:9:6704766:6708768:1 gene:GSCOC_T00033358001 transcript:CDP11240	MSLSIYKLQTFLNSAVGVGGAKQQRPFCLLQLSFKHTIPMARSALDEMSATGAFVRTPSTFRNLISRDPNSPFPAEAERYHLYISYACPWASRCLAYLMIKGLDKCISFTSVKPKWERTKEADEHMGWVFPASSSEEAGADPDPFNGAKSARELYEIASTNYSGKYTVPVLWDKKLNTIVNNESSEIIRMLNTEFNHLAENPELDLYPSHLQDQINEINGWIYDDINNGVYKCGFAKKQEPYNEAVKKLYEALDKAEEILNKQRYLCGGTVTEADVRLFVTLIRFDEVYAVHFKCNKKLLREYPNLFNYTKDIFQIPGVSSTVNMEHIKKHYYGSHPSINPFGIIPQGPDIDYSSPHDRARFSK	---NA---	0	33.032	14	5	10	5	1	364	41.5	7.24	263	5	0	2.317	3.014	1.301	1.21	1.59	0.38	0.107106	0.020347	0.894699	0.245599	0.0483223	1	383.2	888.1	1155.3	50.07	36.05	17.27	244	241.6	602	625.8	619.8	655	1225.8	1204.1	993.8	1001.6	1363.2	1332.5	244	214.3
High	CDP09136	pep chromosome:AUK_PRJEB4211_v1:1:31947156:31954082:1 gene:GSCOC_T00028345001 transcript:CDP09136	MIWFAQLLLLLLLVQENRTVVGATSNYLIGLGSYDITGPAADVNMMGYANMDQTASGVHFRLRARAFIVSEPQGNCILFVNLDACMASQLVTIKVLERLKTRYGDLYTDKNVAISGIHTHAGPGGYLQYVVYIVTSLGFVRQSFDALVDGIEQSIIQAHENLRPGSIFVNTGELLDAGVNRSPSAYLNNPTAERNKYKYDVDKEMTLLKFVDDEWGPVGSFNWFATHGTSMSRTNGLISGDNKGAAARFMEDWFDQTNAGSTFSKASESSEVPRRVSNIIPIVHEKHHELLELAASFKSSPGRPATKFMSMARRVRSALRLADRPRFVSAYCQTNCGDVSPNVLGAFCRDTGLPCDFNHSTCGGKNELCYGRGPGYPDEFESTRIIGERQFKKAVDLFN…	Neutral ceramidase 1; Short=AtNCER1; Short=N-CDase 1; Short=NCDase 1; AltName: Full=Acylsphingosine deacylase 1; AltName: Full=N-acylsphingosine amidohydrolase 1; Flags: Precursor	0	10.644	11	4	5	4	1	766	84.2	7.3	59	4	0	2.316	1.338	0.578	1.21	0.42	-0.79	0.755603	0.989149	0.94751	1	1	1	161.9	375.1	216.6	83.03	77.56	83.84	58.1	68.4	383.2	390.3	183	134	830.6	768.7	83.5	88.2	548	532.4	58.1	60.7
High	CDP14965	pep chromosome:AUK_PRJEB4211_v1:8:8611494:8615881:-1 gene:GSCOC_T00042478001 transcript:CDP14965	MTGSVPVESSSINVVVVISKSSEFPNDALFLEISRILKPGGTVLVHLTSQSTPLQETKSSLERKLLLAGLLDVKSCEAGQSIGKIGSSFSLKKQTKSLPAVQINDDTDLIDEDTLLSEEDLKKPQPPVLLKCDCEVGKARKACKNCTCGWAEVEEKVKLGLTMDQLNNPQSACGNCGLGDAFRCSTCPYKGLPPFKMGEKVTSSQNFLAADI	Anamorsin homolog; AltName: Full=Fe-S cluster assembly protein DRE2 homolog	0	15.339	19	2	7	2	1	212	22.7	5.73	127	2	0	2.314	2.066	0.893	1.21	1.05	-0.16	0.122425	0.222806	0.995824	0.275599	0.38405	1	85.7	198.4	177.1	46.38	3.15	8.26	56	57	128.8	135.5	197.6	203.6	199.1	188.8	157.3	177	177.2	192.8	56	50.6
High	CDP08400	pep chromosome:AUK_PRJEB4211_v1:7:25954466:25962781:1 gene:GSCOC_T00027235001 transcript:CDP08400	MTKKPLIALVFTLLLLLSSASPSPLPASVCIIGSGIGGSSVAHFLRHYSNSNPYDAQIGQIRIFERHGVVGGRMATVSVAGETFEAGASILHPKNYHALEFTRLLNLTVRKPSTSMSCFSLGIWDGHKFIFKTFTSDSESVIVQSFVSLANSIKMFLRYGRSLFRMTNFVERMLGKFLKYYKPFDSRPVFESVEEMLKWAGLYDLTTQTLEEELVDAGLSPLLIQELVTVITRINYGQSVRISGLAGAVSLAGSGGGLWSIEGGNWQMAAGLINQSHVVLHPHTEIESLSYVSGLYELNSTEGESYTCEVAVIATPLDELNIRFTPGISIPERQLQHTFTTFVRGCLNPKYFGFDMVSDIPELVGTTETPGVPFSSISVLNKHGEKDMTYKIFSRQLMP…	---NA---	0	14.428	11	2	6	2	1	495	54.7	6.58	49	2	0	2.313	2.711	1.172	1.21	1.44	0.23	0.619938	0.419948	0.9964	0.967995	0.65787	1	61.3	141.9	166.3	74.52	74.85	61.95	27.2	29	130.8	129.8	68.5	58.3	299.6	293.7	92.3	91.6	299.5	309.5	27.2	25.7
High	CDO97830	pep chromosome:AUK_PRJEB4211_v1:4:821942:826070:-1 gene:GSCOC_T00021745001 transcript:CDO97830	MLRRRSIKAFIFIAALFCAVSLLPGEASVHRYPGEKFGIKGNAFIVHGGSEGIYSSLPGFNASSKPDSFIRFEKIVFRRPKEFSNFSSWPIHAVIFEVDDRETIGGSAYGGQRAVCCTADLAKLGVCKQGDVIYRPSTINPGWPQVFDVRFQADELDAALQPSSIQITKTGMYNLYFIHCDLNLKEVTVEGKTIWKNPSGYLPGRMAPLMNFYGFLSLAFVVLGLFWFSQYARFWREVLTLQNCITLVITLGMFEMALWYFDYAKFNEAGIRPIGITVWAVTFGAVKRTVSRLIILMVSMGYGVVRPTLGGLTSKVLMLGGTFFIASEVLELVENVGAISDLSGKARLFFVLPVAVLDAFFILWIFTSLSATLNKLQARRMLAKLDIYRKFTNALAVAV…	---NA---	0	20.735	6	2	5	2	1	511	57.1	7.83	191	2	0	2.313	1.247	0.539	1.21	0.32	-0.89	0.916823	0.999767	0.962509	1	1	1	63.7	147.4	79.5	96.97	99.27	99.99	203.8	228.7	18.6	19.9	548.4	502.4	37.2	43.2	285.5	285.4	18.9	22.1	203.8	202.9
High	CDP19302	pep chromosome:AUK_PRJEB4211_v1:2:28843106:28847536:-1 gene:GSCOC_T00011531001 transcript:CDP19302	MSGAGKVVCVTGASGYVASWLVKMLLECGYTVKASVRDLNDPDKMEHLISLDGAKERLHLFAADLMKDGSFDEMVDGCEGVFLTAYPLKPVVSDPEGVVFLLFLLHVEAELLDPAVKGTLNVLQSCARVSSVKRVVVTSSMASIAYNRELKNGVVVDESWFSEASYSVERKLWYILSRTLAETAAWNFSKEHGIEMITIHPSWIVGPHLQPSINISVQLILNLLNGDESFPYATFNWVDVRDVAYAHVLAFENPSASGRYCLVERAAHTSQVIKILQELYPTHQFPDKFSHDSILINPDYSVSNEKAKALGVEFIPLEESLKDTIEGFKKKNLVSL	---NA---	0	11.487	10	2	7	1	1	336	37.2	5.52	157	2	0	2.307	2.548	1.104	1.21	1.35	0.14	0.0713638	0.0390704	0.997314	0.176667	0.0856908	1	56.8	131	144.6	45.49	6.96	10.14	42	33.6	91.9	76.7	131.1	130.9	142.1	119.8	138	151.6	127.2	160.3	42	29.8
High	CDP03238	pep chromosome:AUK_PRJEB4211_v1:6:8691755:8694451:-1 gene:GSCOC_T00041752001 transcript:CDP03238	MSWQAYVNDHLMCDVGDGNTLTAAAIIGHDGSVWAQSASFPQLKPEEVSGIMNDFAEPGSLAPTGLFLAGTKYMVIQGEPGAAIRGKKGSAGATIKRTGQALIIGTYDEPLTASQCNMVVERLGDYLIDQGL	Profilin-1; AltName: Full=Pollen allergen Par j 3.0101; AltName: Allergen=Par j 3.0101	0	23.329	36	3	6	2	1	132	13.9	4.81	231	3	1	2.305	2.172	0.942	1.2	1.12	-0.09	0.594436	0.644427	0.999987	0.951595	0.905965	1	556.5	1282.9	1208.7	65.5	71.2	69.97	1040.4	1095.1	293.2	297.7	2631.8	2553.5	644.5	586.7	2444.9	2421.2	603.4	590.5	1040.4	971.4
High	CDP13974	pep chromosome:AUK_PRJEB4211_v1:2:4756547:4759344:1 gene:GSCOC_T00039129001 transcript:CDP13974	MMLKAAPAFALLNPAKGENLGPLFSFSTQFSRQGSVLTKNFPARDGNGGLLVYAKKETNNQPLTGILFEPFEEVKKELMLVPSAPQASLARHKFVDDCEAAINEQINVEYTVSYIYHALFAYFDRDNVALKGLAKFFKESSEEERDHAEKLMEYQNKRGGRVKFECINKPNTEFDHPEKGDALNAMEIALCFEKLVNEKLLKLHAVATQNNDVQLADFVESEFLVEQVEAIKKISEYVAQLRRVGKGHGVWHFDQALLHEH	---NA---	0	24.235	22	4	9	4	1	261	29.5	6.13	143	4	0	2.301	1.501	0.652	1.2	0.59	-0.62	0.000382215	0.0792472	0.082951	0.00261938	0.159741	0.35453	598.8	1377.8	898.7	12.23	15.46	15.35	539.2	537.5	666.9	664.9	1247.9	1144.7	1587.5	1521.2	784.6	801.9	1058.7	1007.1	539.2	476.8
High	CDP06805	pep chromosome:AUK_PRJEB4211_v1:2:36874106:36880416:1 gene:GSCOC_T00023792001 transcript:CDP06805	MADGGLTILDGNQLRAVDLSPPSPDGAVTGAQLLELAESRVSASLFGLALPENLKSAVLRRLEIGDDFSSFSAKELDRENASSFLQNYVSIAADELKDDPMVLSILDGKALRIILEDEDDFAMLAENLFTDLDIEDRGKIRKSEIQNALLHMGIEMGVPPFAEFPRLSDILKKHGAEGEEELGQAQFAQLLQPVLQELADALTENHVVVVQNVKIINGSQLRKVLANEKLLNDVVDKIIQEKNGQADAKTTKELIRYFLQKNGKDLGLPPLRADEMVVLLYDAVFADVEETKNTPGSEENFMVVLNEILVRFAEQLEANPVFHDLGI	---NA---	0	37.766	45	7	15	7	1	327	36	4.59	146	7	0	2.292	3.261	1.423	1.2	1.71	0.51	0.21993	0.0438012	0.883182	0.440493	0.0950103	1	293.5	672.7	956.9	56.05	32.09	45.22	462.8	500.3	150.5	186.1	886.3	867.4	472.2	521.6	1411.9	1416.1	648.5	589.5	462.8	443.8
High	CDO96936	pep chromosome:AUK_PRJEB4211_v1:2:15177415:15178553:-1 gene:GSCOC_T00014125001 transcript:CDO96936	MAADEGGEQRQTERAKGHVKWFNDQKGFGFITPTDGGEDLFVHHSGIKAGGGGFRSLGEGEAVEFEVEQGGDGRTKAVNVTGPDGGPVQGGSRGGGGGGGYNGGGGGRSRGGGGYGGGGGYGGGGGGYGGGGGGYGGSGGGYGGSGGGGCFKCGESGHLARDCYQGGGGGGRYGGGGSGCFKCGEDGHFARECPNSNR	Glycine-rich protein 2	0	30.113	18	2	8	2	1	198	18.8	6.67	317	2	0	2.288	3.794	1.658	1.19	1.92	0.73	2.95078e-05	9.46695e-08	0.00720145	0.000381446	1.83804e-06	0.0597517	209.5	479.4	795	3.76	21.42	3.87	211.3	210.4	194.7	208.6	602.3	563.4	396.8	407.9	811.9	820.4	778.4	754.1	211.3	186.6
High	CDP09064	pep chromosome:AUK_PRJEB4211_v1:1:31456552:31459421:-1 gene:GSCOC_T00028253001 transcript:CDP09064	MAVVGLVCIASVLALAFMLGAEARIPGVYTGGDWQSAHATFYGGSDASGTMGGACGYGNLYSQGYGVNTAALSTALFSSGLSCGACFEIKCASDPGWCHPGSPSIFVTATNFCPPNYALPNDNGGWCNPPRPHFDLAMPMFLKIAEYRAGIVPVTYRRVPCRKQGGIRFTINGFRYFNLVLVTNVAGAGNIVRVSVKGSRTGWISMSRNWGQNWQTNGNLVGQSLSFRVAASDRRSSTSWNIAPAHWQFGQTFVGKNFRV	Expansin-A6; Short=AtEXPA6; AltName: Full=Alpha-expansin-6; Short=At-EXP6; Short=AtEx6; AltName: Full=Ath-ExpAlpha-1.8; Flags: Precursor	0	23.486	19	3	4	3	1	260	27.8	9.29	87	3	0	2.278	1.705	0.748	1.19	0.77	-0.42	0.697115	0.91286	0.990332	1	1	1	123.2	280.6	210	43.78	84.28	79.54	190.4	168.4	74.2	90.1	725.9	674.4	116.8	103.3	484.2	482.1	86.6	91.5	190.4	149.4
High	CDO97918	pep chromosome:AUK_PRJEB4211_v1:4:1529050:1536056:-1 gene:GSCOC_T00021864001 transcript:CDO97918 description:Beta-galactosidase 1 [Source:Projected from Arabidopsis thaliana (AT3G13750) UniProtKB/Swiss-Prot;Acc:Q9SCW1]	MWKVLALLVLVLLGSWVSCGTASVSYDNTAIIVNGQRRILISGSIHYPRSTPEMWPDLIQKAKEGGLDVIETYVFWNGHEPQPGKYYFEGRYDLVKFVNLVKEAGLYVNLRIGPYVCAEWNFGGFPVWLKYVPGISFRTNNGPFKAAMQKFTTKIVNMMKAERLYEPQGGPIILSQVENEYGPMEYELGAPGRAYTEWAAKMAVDLGTGVPWVMCKQDDAPDPVINTCNGFYCDYFSPNKAYKPKIWTEAWTGWFTEFGGAQPYRPAEDLAFSVAKFIQKGGSFINYYMYHGGTNFGRTAGGPFIATSYDYDAPLDEYGLLRQPKWGHLKDLHRALKLCEPALVSGNPTVTPLGNYQEAHVFKSKSGACAAFLANYNSQSFARVAFGNMHYNLPPWSIS…	---NA---	0	4.749	5	2	2	2	1	835	92.3	7.94	69	2	0	2.261	2.574	1.139	1.18	1.36	0.19	0.304948	0.214438	0.999139	0.574374	0.371313	1	26.2	59.2	67.4	44.97	75.13	68.26	13.9	19.7	39.5	34.8	29	29.4	146.3	119.3	37.4	34.2	148.1	121.5	13.9	17.5
High	CDP06008	pep chromosome:AUK_PRJEB4211_v1:5:25351798:25353527:-1 gene:GSCOC_T00021350001 transcript:CDP06008	MHQKTSCEKKKKTSCEKQSLKKSINTKRLQPCRYLSFHFQFIPYRTKRIPMARCTFPFSPCLSILLLLCFLAISTRAQVPANNTFKIVNTGPLGEFQNFVPTAEYGATYRIITNDVYDFYTFPFRLCFYNTTPTSFVLGIRVGIPDDEGLMRWVWDANRNHPVKENATLSFGRDGNLVLADSDGGLVWQTNTANKGVTGIKLLQNGNLVLYDTKGKFIWQSFDYPVDSLLVGQSLRESGVNKLVSRTSDVDGSDGKYSLVLGDDGLLLYLNNAGQQVRYNGWPGNFGSTVRFNTQPSTWEPTPIAWNLIFEIFESPAPKPQVDGIQQLSKINYNATYSFLRLETDGNVKAYTYYDKVRFDRWMQTYTFFPSDLATACALPTKCGNFGLCQNGMCVACPT…	EP1-like glycoprotein 2; AltName: Full=Curculin-like (Mannose-binding) lectin family protein; Flags: Precursor	0	40.732	15	3	13	3	1	498	56.2	8.63	431	3	0	2.261	0.38	0.168	1.18	-1.39	-2.57	0.183238	0.0969891	0.001272	0.379389	0.189089	0.0166412	402.2	909.3	153	33.82	36.5	39.05	555	531.9	291.4	304.2	1326.4	1236	667.8	668.9	221	213.5	109.7	105.4	555	471.8
High	CDP07877	pep chromosome:AUK_PRJEB4211_v1:8:19406619:19407292:-1 gene:GSCOC_T00025360001 transcript:CDP07877	MQDIFSGGTETSSTTVEWAMSELMRNPRAMVKAQSEVRNAFVGKKTIEETDIQELKYLKSVIKETLRLHPPVPLLVPRKCRQVTEIDGYIIPIKTRVIVNAWAIGRDPEYWDDPESFKPERFENSSVDFSGCHFQYVPFGAGRRICPGISFGLANVELPLALLLYHFDWKLPNGLKPSDLDMTETMGITAPRKENLRLLATVYDASL	---NA---	0	12.274	16	2	6	2	1	207	23.5	6.35	210	2	0	2.259	2.61	1.156	1.18	1.38	0.21	0.000267772	3.27088e-05	0.739206	0.00193935	0.000209349	1	338.9	765.6	884.6	15.17	17.86	18.72	300.4	294.8	382.4	392	667.3	630.1	890.2	878.3	756.4	768.4	1018.5	1086.5	300.4	261.5
High	Q96372	Cell division cycle protein 48 homolog OS=Capsicum annuum OX=4072 GN=CAFP PE=2 SV=1	MTDQAESSDSKNAKKDFSTAILERKKAANRLVVDEAVNDDNSVVALHPATMEKLQLFRGDTILIKGKKRKDTVVIALADETCDEPKIRMNKVVRSNLRVRLGDVVSVHQCPDVKYGKRVHILPIDDTIEGLTGDLFDAFLKPYFLEAYRPLRKGDNFLVRGGMRSVEFKVIETDPGEYCVVAPDTEIFCEGEPVKREDEERLDEVGYDDVGGVRKQMAQIRELVELPLRHPQLFKSIGVKPPKGILLYGPPGSGKTLIARAVANETGAFFFCINGPEIMSKLAGESESNLRKAFEEAEKNAPSIIFIDEIDSIAPKREKTHGEVERRIVSQLLTLMDGLKSRAHVIVMGATNRPNSIDPALRRFGRFDREIDIGVPDEVGRLEVLGIHTKNMKLAEEVD…	Cell division cycle protein 48 homolog	0	209.929	43	31	86	1	1	805	89.3	5.2	1453	31	0	2.256	2.192	0.972	1.17	1.13	-0.04	0.233494	0.251834	0.999998	0.46102	0.427659	1	29.4	66.4	64.6	53.43	17.45	58.94	19.5	16.6	51.8	44.5	50	63.3	76.5	69.7	33.4	38.5	108.3	112.9	19.5	14.7
High	CDP06010	pep chromosome:AUK_PRJEB4211_v1:5:25337862:25339728:-1 gene:GSCOC_T00021353001 transcript:CDP06010	MSSWSFSFSVCLSSLLILYFFTASTVAQVPANATFKIINEGEFGDYITEYDAGYRVISNDFFAFPFSLCFYNTTPGEFILGMRAGIPRDEDLMRWVWDANRNHPVKENATLSFGRDGNLVLADVDGTVAWQTNTANKGVTGIKLLPNGNLVLYDKKGKFIWQSFDHPVDTLLVGMSVKKNGRLVSRTSEADGRDGRYSLVLDNSGFSLYLNNSGQLVNYNGWQGSAYSSVRFNTTPIDEDPKSAGWELLLQTFEDSKSPPTPSPTPSGRRLLQSFPVGSANTVILRKVNYNATLSFLRLQSDGNVKVFTYFDKVPYLRWSETFAFFSSYYVRECGLPSKCGSFGLCQMGMCVACPSPNGLLGWSEDCQPPKLKPCAAKAKVDYYKIAAAEHFLNRESTG…	EP1-like glycoprotein 2; AltName: Full=Curculin-like (Mannose-binding) lectin family protein; Flags: Precursor	0	11.611	6	2	5	2	1	456	50.7	7.97	166	2	0	2.256	2.038	0.903	1.17	1.03	-0.15	0.18842	0.29737	0.997782	0.388412	0.491696	1	820.9	1851.9	1673	9.03	1.42	34.15	776.7	758.2	916.1	867.7	1861.1	1807.2	1864	1842.8	2210.7	2290.7	1185.4	1266.1	776.7	672.5
High	CDP13375	pep chromosome:AUK_PRJEB4211_v1:11:33269408:33275233:1 gene:GSCOC_T00038287001 transcript:CDP13375	MATLSSSPHCSSSPYYSNSSSIVFHHQQVVTLSSIRPQSFGPGRFSLRSKTKPNSIVVCMQDGAAAATISPIENETPLKKLTDGLLNIASPEDRKEAAAFDINRDKSSVSITVVGASGDLAKKKIFPALFALYYEGCLPEHFTVFGYARSKMTDAELRTMVSKTLTCRIDKRENCGEKMEEFLNRCFYHCGQYDSQEHFGELDKKLKEQEAGRVSNRLFYLSIPPNIFIDAVKCASLSASAANGWTRVIVEKPFGRDSESSAALTKALKQYLEEDQIFRIDHYLGKELVENLSILRFSNLIFEPLWSRQYIRNVQLIFSEDFGTEGRGGYFDSYGIIRDIMQNHLLQILALFAMETPVSLDAEDIRNEKVKVLRSMRPLKLDDVVIGQYKSHTKGVVTY…	Glucose-6-phosphate 1-dehydrogenase, chloroplastic; Short=G6PD; Flags: Precursor	0	31.65	12	6	12	6	1	595	67.3	7.9	322	6	0	2.232	3.341	1.497	1.16	1.74	0.58	0.137484	0.0125655	0.70199	0.302447	0.0319088	1	578	1290.1	1930.8	44.87	39.83	32.61	385.4	379.1	866.8	869.6	907.3	893.2	1862	1834.3	1478.4	1439.3	2676.7	2521.8	385.4	336.3
High	CDP17143	pep chromosome:AUK_PRJEB4211_v1:7:27458118:27462877:1 gene:GSCOC_T00011168001 transcript:CDP17143	MLLSPEELNLDLIRSAKVFHYGSISLIVEPCRSAHIKAMEAAKAAGVLLSYDPNLRLPLWPSAEEARKQILSIWDKADIIKVSDVELEFLTGSNKIDDESAMSLWHPNLKLLLVTLGEKGCNYYTKNFHGSVPAFHVNTVDTTGAGDSFVGALLCKIVDNQAILEDEARLKEVLRFACACGAITTTKKGAIPALPTESDALSLIKGGE	Fructokinase-2	0	45.196	36	7	14	6	1	208	22.6	5.6	354	7	1	2.23	3.376	1.514	1.16	1.76	0.6	0.0382241	0.00175388	0.51947	0.102811	0.00572989	1	811.5	1809.4	2740.1	27.22	7.48	5.12	621.2	649.9	1039.5	1013.3	1742.4	1686.3	1988.7	1879	2674.8	2553	2807	2864.5	621.2	576.5
High	CDP11603	pep chromosome:AUK_PRJEB4211_v1:11:15037358:15041387:-1 gene:GSCOC_T00033961001 transcript:CDP11603	MDYPGFGLSEGLHGYIRSFNRLVDDVIEHYSKVKENPDFCGLPSFLFGQSMGGAVALKVHLKQPNSWNGAVLVAPMCKIADDLVPPPFVTQVLIGVAKLLPKCKLVPQKDLAELAFRDAKKRNLTAYHVIAYKHKPRLRTALELLKTTQEIEQKLEKVSLPLLILHGKADAITDPSISEALYEKASSADKKLILYDDAYHSLLEGEPDEVILKVFGDIISWLDVHSS	---NA---	0	11.088	12	2	3	1	1	227	25.2	6.95	79	2	0	2.218	1.784	0.804	1.15	0.84	-0.31	0.734981	0.90836	0.995204	1	1	1	134.5	298.3	239.9	76.21	77.19	75.25	61.7	58.5	293.2	293.6	138.1	135.2	716.6	644.3	104.5	112.8	519.2	510.5	61.7	51.9
High	CDO97223	pep chromosome:AUK_PRJEB4211_v1:2:17406111:17408969:-1 gene:GSCOC_T00014491001 transcript:CDO97223	MGSLEVEKETTGWAARDPSGILSPYTYTLRNTGPEDVYVRVICCGICHTDIHQIKNDLGMSNYPMVPGHEVVGEVVEVGSEVTKFRVGDCVGVGVLVGCCKTCRPCKADIEQYCNKKIWSYNDVYTDGRPTQGGFAGAMVVHQKFVVKIPDGMSAEQAAPLLCAGVTVYSPLNHFGLKESGLRGAILGLGGVGHMGVKIAKAMGHHVTVISSSNKKREEAIEHLGADEYLVSSDTARMQGFADSLDYIIDTVPVCHPLEPYLSLLKVDGKLILMGVINTPLQFVSPMVMLGRKTITGSFVGSMKETEEMLEFCKERNLTSTIEVVKMDYVNTALERLEKNDVRYRFVVDVAGSKLEQ	---NA---	0	60.329	43	12	25	12	1	357	39	6.24	538	12	0	2.218	1.574	0.71	1.15	0.65	-0.49	0.226487	0.725616	0.864731	0.450383	0.986776	1	1976.2	4383.1	3110.7	49.47	50.07	51.31	1237.1	1262.7	3092.8	3152.9	2786.3	2749.4	7107.5	6894.9	1899.5	1947.1	5028.3	4969.7	1237.1	1120
High	CDO97205	pep chromosome:AUK_PRJEB4211_v1:2:17275073:17276600:-1 gene:GSCOC_T00014473001 transcript:CDO97205	MGSVSSNVAILLIIFELYTTLLLLHNHLANADPIASKARETLEIIIGGGIGGGGDNPSDAPPPDDGPSCPPPVSPFTFESKRIEIVYPVIQRLKAKITCDPLGITKSWVGPDICNKYQGFRCATVPDYGVKALADVQFNGYNFSGPDLTLEGFIDELPDLSIFHGNSNKFAGNIPKKLSTIRYLFELDLSNNNFNGQFPYEVLGATKLTFLDLRFNSFSGAVPPQVFTLDLDVLFINNNNFVQRLPDNLGSLPVLFLTLANNKLTGPIPSSIGKASKTLDEVIFLNNQLTGCLPCEIGLLNKATVFDVSRNLLTGPIPWSFACLAKMEILNLAKNQFFGVVPDPICQLPNLESFDLSSNYFTGVGPECWKLIQRKVLDVTMNCIPGLPNQRSKAECDAF…	Uncharacterized protein At4g06744; Flags: Precursor	0	24.511	15	5	11	5	1	446	48.5	6.84	179	5	0	2.215	0.609	0.275	1.15	-0.72	-1.86	0.000360625	0.0245787	1.40332e-06	0.00249136	0.0572149	0.000126247	1552.6	3439.4	944.8	3.03	11.74	19.53	1588.4	1539	1566.3	1480	3909.8	3712.9	3186.1	3064.9	1127.1	1113.6	791.2	801.5	1588.4	1365.1
High	CDO98335	pep chromosome:AUK_PRJEB4211_v1:4:4703740:4710436:1 gene:GSCOC_T00022398001 transcript:CDO98335	MDAWIICPFFLEGGRYTINDIHYVADSDRLIPAGETEFARDAAFGYKSSHLREWVEEKTGGRIPARSVASISIQLLRKGGPDAVCEHLCNLEKGSTCIVNAASDRDMAVFAAGMIQAEVKGKRFLCRTAASFVSARLGIIRKAPVLPNDLGINGERSGGLIVVGSYVPKTTKQVEELKSQCGHFLKSIEISVEKVAMRSTKERQDEITRTVEIADIYLRSCKDTLILTSRKLITGKTPSESLEINSKASSALVEIVQRITTRPRYVLAKGGITSSDLATKALGARCAKIAGQALPGVPLWQLGPESKHPEVPYIVFPGNVGDSNALAEVVKQWASVRISSTKELLHNAERGGYAIGAFNVYNLEGVQAVVAAAEDEGSPAILQIHPSALKQGGTPLVAC…	---NA---	0	26.164	15	6	10	6	1	617	66.6	7.11	254	6	0	2.213	2.446	1.105	1.15	1.29	0.14	0.241972	0.157236	0.998695	0.474393	0.284867	1	432.8	957.7	1058.6	36.17	54.73	54.14	600.7	594	309.4	315.4	1557.4	1595.9	588.9	537.7	1753.3	1697.4	660.2	590	600.7	526.9
High	CDP07747	pep chromosome:AUK_PRJEB4211_v1:2:25664507:25667422:-1 gene:GSCOC_T00025101001 transcript:CDP07747	MASHSQDQGHCGSCWAFGAVESLSDRFCIQFGMNISLSANDLLACCGFLCGDGCDGGYPIAAWRYFRYAGVVTEECDPYFDKTGCAHPGCEPEYPTPKCIRKCVKENLLWRKSKHFSTSAYRISSDPQNIMAEVYKNGPVEVSFTVYEDFAHYRSGVYKHTTGDEMGGHAVKLIGWGTSDDGEDYWLLANQWNRSWGDDGYFKIRRGTNECGIEADVVAGTPSSRNLNLVPEYNEADVSLDASI	Cathepsin B-like protease 2; AltName: Full=Cathepsin B2; Short=AtCathB2; Flags: Precursor	0	87.716	47	8	53	8	1	244	27	5.12	1043	8	0	2.212	1.587	0.718	1.15	0.67	-0.48	9.91294e-06	0.00276903	0.0387923	0.000168399	0.00849629	0.203097	2468.5	5461.3	3918.7	15.96	12.28	13.66	2133.1	2162.7	2817.7	2854.2	5059.1	4715.9	6122.2	5895.4	3492.9	3463.5	4396.4	4426	2133.1	1918.3
High	CDP05480	pep chromosome:AUK_PRJEB4211_v1:11:21368854:21378201:1 gene:GSCOC_T00020547001 transcript:CDP05480	MKESPNLIFHVLFLLLLISPSVFSWKKDEFRNCNQTPFCKRARSRKPGACNLIATEVSISDDGDLIAKLITKIPENNGSQDPPVEVDSQPLLLTISVYQDGILRLKIDEDQSLNPPKKRFEEKIDNDLGFSSVVYLDGDYEGVLRHDPFEVFVRERGNGKRVLSINSNGLFDFEQLREKKEGDDWEERFRSHTDTRPYGPQSISFDVSFFGADIVSGIPEHATSLALKPTSGPGVEDGFSEPYRLFNLDVFEYLHESPFGLYGSIPFMFSHGKARGSSGFFWLNAAEMQIDVFGTGWNAGQDKIMMPVDEKRIDTLWMSEAGVVDAFFFVGPGPKDVVRQYTSVTGRPAMPQLFATAYHQCRWNYRDEEDVFGVDSKFDEHDIPYDVLWLDIEHTDGKR…	Probable glucan 1,3-alpha-glucosidase; AltName: Full=Glucosidase II subunit alpha; AltName: Full=Protein PRIORITY IN SWEET LIFE 5; AltName: Full=Protein RADIAL SWELLING 3; Flags: Precursor	0	18.165	9	6	8	5	1	913	103.9	6.01	113	6	1	2.208	3.943	1.786	1.14	1.98	0.84	0.00627569	3.67417e-05	0.0621702	0.022667	0.000230965	0.283323	338.1	746.5	1333.3	25.36	12.9	6.33	418.7	424.6	266.7	273	842.3	832.4	669.4	669.1	1385.4	1386.7	1283.3	1216	418.7	376.6
High	CDP08856	pep chromosome:AUK_PRJEB4211_v1:2:52431312:52435014:1 gene:GSCOC_T00027969001 transcript:CDP08856	MAGIKPGVLALFDVDGTLTAPRKAATPEMLQFMQKLRKVVAVGVVGGSDLVKISEQLGKTVITDYDYVFSENGLVAYKGGKLIGTQSLKSFLGEEKLKEFINFTLHYIADLDIPIKRGTFIEFRSGMLNVSPIGRNCSQEERDEFEKYDKVHNIRPKMVSVLREKFAHLNLTFSIGGQISFDVFPQGWDKTYCLRYVDEFPEIHFFGDKTYKGGNDSEIYESERTVGHTVTSPDDTVKLCSSLFLG	Phosphomannomutase; Short=GmPMM	0	10.515	11	2	5	2	1	246	27.6	6.42	127	2	0	2.205	2.247	1.019	1.14	1.17	0.03	0.137877	0.123273	0.999995	0.303191	0.231544	1	506	1115.4	1137.1	40.21	41.76	41.88	338.4	360.1	732	711	776	754.9	1603.3	1658.9	779.1	781.8	1682.9	1654	338.4	319.4
High	CDO97866	pep chromosome:AUK_PRJEB4211_v1:4:1153395:1159762:1 gene:GSCOC_T00021800001 transcript:CDO97866	MSFLRRRKPPENQKPTPPQPEPELEEDDNKKKELTPNKKIPKKAEERVKWSCLDNCCWFVGCVCTVWWGLLFLYNAMPASIPQFVSEAITGPWPDPPGVKLHKEGLKAKHPVVFVPGIVTGGLELWEGHQCAEGLFRKRLWGGTFGEVYKRPLCWVEHMSLNNETGLDPPSIRVRPVPGLVAADYFVPGYFVWAVLIANLARIGYEEKTMHMAAYDWRISFQNTEVRDQTLSRIKSNIELMVATNGGKKAVVVPHSMGALYFLHFMKWVEAPAPMGGGGGPDWCAKHIKAVMNIGGPFLGVPKSVSGLFSAEARDIAVARAIAPGALDKDLFHIQTLQYIMKMTRTWDSTMSMIPKGGDTIWGGLDWSPEEGYLPSKRKKHRSNAADCSADNENVSTES…	Phospholipid:diacylglycerol acyltransferase 1; Short=AtPDAT	0	37.446	13	6	10	6	1	679	75.6	6.95	306	6	0	2.201	2.651	1.204	1.14	1.41	0.27	0.476584	0.291265	0.995411	0.802041	0.485229	1	241.5	531.6	640.2	48.52	48.01	41.13	385.2	371.7	156.9	152.5	843	803.5	351.7	329.2	917.8	910.8	449.9	418.8	385.2	329.7
High	CDP21817	pep supercontig:AUK_PRJEB4211_v1:scaffold_6901:1042:1981:-1 gene:GSCOC_T00005975001 transcript:CDP21817	MGSRYEVEVAITSAKDLKNVNWRHGPLKPYAVVWVDPKAKCSTRVDDEGDTSPYWEETLVIPFDSPIEDSTLLIDVVHAKAAEDTKPLIGSARLRLIDVVDEAGLGRRVERKLELKRPSGRPHGKLQVQVSVREPPRYRAPDPYYAPPYGVPQPGSRDYAAPQPYGNPPYGAPPASAYAAPPAGYPYSAPPAAPPPSYGQPSYGQPAYGQPSYGQPVYGEEKKKSKFGGMGTGLAVGAVAGALGGLALFEGIDYAKDKIADDAAEKVEEDIGYDDDDGGDW	---NA---	0	53.294	30	9	34	9	1	281	30.2	5.15	965	9	0	2.193	3.926	1.79	1.13	1.97	0.84	0.0309455	0.000284281	0.150389	0.0866829	0.00127622	0.547053	1727	3787.1	6779.6	5.87	3.89	7.78	1754	1843.8	1601.6	1700.5	3920.4	3913.8	3659	3664.5	7307.4	7186	6396.1	6281.7	1754	1635.5
High	CDP17960	pep chromosome:AUK_PRJEB4211_v1:2:43989021:44004329:1 gene:GSCOC_T00001204001 transcript:CDP17960	MAENNGGIEVIHSWSAPRSLSTSLMYSFAQRDDTEVLDEPLYANFLRVTGLERPYQQELLSKLESDGNKVVREIIFGPGGKKYRFCKHLAKQLLPGLSEDLMKKGKHFILIRNPLEILPSFDKVVPPSFSELGLAGLVSIYSQLCELGKPPAIIDAAELQADPEFALRGLCEDLGIPFQDSMLKWEAGPKSFDGLWAPWWYKSVRESTCFTPNTKYPSPLPQPLYDLLEQSLPFYNMLRHRVKRRSSLPPPSLPVPANEKLLAWVGDEIVPRESARVSVFDSVVQGGDAVWEGLRVYKGKIFKLEEHLDRLFDSAKALAFSNVPTRDEVKEAIFKTLIYNGMFDNAHIRLTMTRGKKVTSGMSPAFNLYGCTLIVLAEWKLPVYDNTRGITLVTAATRR…	Branched-chain-amino-acid aminotransferase-like protein 2	0	17.938	5	2	4	2	1	554	62	7.05	104	2	0	2.191	1.688	0.77	1.13	0.76	-0.38	0.0121543	0.182615	0.543454	0.0394768	0.323188	1	71	155.6	119.8	3.3	12.22	27.15	72.8	69	73.5	69.3	156	189.6	155.1	144.1	148	146.6	85.6	98	72.8	61.2
High	CDP09752	pep chromosome:AUK_PRJEB4211_v1:8:29491316:29494864:-1 gene:GSCOC_T00030205001 transcript:CDP09752	MKLKVFADRGSQPSRAVLIFCKANGIEFEEVQIQLAKGEHKSPEYEAINPMKQVPAIEVDGKFRLFESHAILRFLATAFPGIAEHWYPADVFKRAQIDSALDWHHSTIRRGSVGVVLNTTLAPLFGQPLDPQAAAEAEKLLSASLAKIESFWLKGDGPFLLGNSEPSIADLRLVCEIMQLELVDEKLQKRILDPYAKVRKWVEDTRKAIQPHFDEIHVAFFQMKEMIKKALAGAGSGETKTG	Glutathione S-transferase T1; Short=AtGSTT1; AltName: Full=GST class-theta member 1; AltName: Full=Glutathione S-transferase 10	0	86.728	49	11	75	6	1	242	27	7.18	1026	11	6	2.188	2.887	1.319	1.13	1.53	0.4	7.42848e-05	2.06216e-06	0.200418	0.000745452	2.26493e-05	0.659419	3645	7974.1	10521.8	2.62	5.2	10.42	3557.7	3696	3594.7	3768	8417.7	8247.1	7710.2	7553.6	11517.1	11389.2	9720.5	9419.9	3557.7	3278.4
High	CDO97792	pep chromosome:AUK_PRJEB4211_v1:4:526055:532025:1 gene:GSCOC_T00021697001 transcript:CDO97792	MASNYSTTPVTLQSVNPKVLKCEYAVRGEIVTLAQKLEQDLKQNPDSHPFDEIIYCNIGNPQSLGQQPITFFREVLALCDHPAILDRSETQGLFSADAIERAFQILDQIPGRATGAYSHSQGIKGLRETIAAGIAERDGFPADPNDIFLTDGASPAVHMMMQLLIRSEKDGILCPIPQYPLYSASIALHGGTLVPYYLDEATGWGLEISELKKQLETAKSNGVCVRALVVINPGNPTGQVLAEDNQREIVEFCKNEGLVLLADEVYQENIYVPDKQFHSFKKVSRSMGYGEKNISLVSFQSVSKGYYGECGKRGGYMEVTGLSPEIREQIYKVASVNLCSNISGQILASLVMNPPKVGDESYESYTGEKDGILSSLAKRAKTLEDALNSLEGITCNRAE…	Alanine aminotransferase 2, mitochondrial; Short=AtAlaAT2; Short=AtAlaATm; AltName: Full=Alanine-2-oxoglutarate aminotransferase 3; Flags: Precursor	0	57.186	37	9	19	9	1	487	53.5	5.64	299	9	0	2.185	4.194	1.92	1.13	2.07	0.94	0.0521048	0.000477177	0.152467	0.134962	0.00195774	0.550086	481.8	1052.5	2020.4	12.4	6.43	5.24	422.1	441.1	526.1	541.6	1155.8	1088.5	1009	1017.8	2095	2136.2	1921.9	1948.4	422.1	391.3
High	CDP10817	pep chromosome:AUK_PRJEB4211_v1:5:18665733:18675548:1 gene:GSCOC_T00031703001 transcript:CDP10817 description:Aconitate hydratase 3, mitochondrial [Source:Projected from Arabidopsis thaliana (AT2G05710) UniProtKB/Swiss-Prot;Acc:Q9SIB9]	MYKTITSSQLLKKAASSTNSSRNFTSSSRLPRTTAAGSIVEGAATRVNSAKSFNGNSVNNPRLLSYSSALRSVRSSVPRWSHGVDWKSPSSLCSQIRTTSPACNGFYRKMATMASENPFKGTLTSLPKPGGGEFGKFYSLPALNDPRIDKLPYSIRILLESAIRNCDGFQVKKEDVEKIIDWENTSPKQVEIPFKPARVLLQDFTGVPAVVDLACMRDAMDKLGSDPNKINPLVPVDLVIDHSVQVDVTRSENAVQENMEKEFQRNKERFAFLKWGSKAFRNMLVVPPGSGIVHQVNLEYLGRVVFNNDGTLYPDSVVGTDSHTTMIDGLGVAGWGVGGIEAEAAMLGQPLSMVLPGVVGFKLSGKLRNGVTATDLVLTVTQMLRKHGVVGKFVEFYGA…	---NA---	0	121.469	31	23	51	16	1	1009	109.8	7.53	862	23	3	2.184	4.55	2.084	1.13	2.19	1.06	8.78294e-06	1.38557e-09	2.14691e-05	0.000156009	6.35624e-08	0.000927084	1965.4	4291.8	8943.3	2.77	6.75	5.04	2020.5	1972.6	1958.3	1889	4592.1	4521.8	4073.5	4038.9	9290.6	9327.3	8464.9	8609.1	2020.5	1749.7
High	CDP16161	pep chromosome:AUK_PRJEB4211_v1:8:23618184:23624862:-1 gene:GSCOC_T00017243001 transcript:CDP16161 description:Aspartate aminotransferase 3, chloroplastic [Source:Projected from Arabidopsis thaliana (AT5G11520) UniProtKB/Swiss-Prot;Acc:P46644]	MESNTVVSASPTSAAGSSVFAHIVQAPEDPILGVTVAYNKDPSPVKLNLGVGAYRTEEGKPLVLNVVRQAEQLLVNDSSRVKEYLPIVGLADFNKLSAKLILGADSPAVQDNRVTTVQCLSGTGSLRVGAEFLARHYHERTIYIPVPTWGNHPKVFTLAGLSVKSYRYYDPTTRGLNFQGLLEDLQSAPSGAIVLLHACAHNPTGVDPTPQQWEQIRQLMRSKALLPLFDSAYQGFASGSLDADAQSVRMFVADGGECLVAQSYAKNMGLYGERVGALSIVCRAADVAGRVESQLKLVIRPMYSNPPIHGASIVATILKDRNMFHEWTLELKAMADRIISMRQQLFDALRARGTPGDWSHIIKQIGMFTFTGLNSEQVTFMRKEYHIYMTSDGRISMAG…	Aspartate aminotransferase, cytoplasmic; AltName: Full=Transaminase A	0	63.102	37	10	26	7	1	420	45.8	8.38	664	10	3	2.182	2.876	1.318	1.13	1.52	0.4	0.725426	0.433936	0.985505	1	0.675441	1	616.5	1345.3	1773.2	74.47	81.42	71.03	1358.9	1315	289.1	288.7	3222.8	3177	569.6	537.4	3526.5	3874	891.6	885.1	1358.9	1166.4
High	CDP10927	pep chromosome:AUK_PRJEB4211_v1:10:21128687:21134810:-1 gene:GSCOC_T00031889001 transcript:CDP10927	MASRSRVRISSLLIMLSIIGLAAAESGTTEEESKSEEFVVTLDQSNFHEFVSKHKFIVVEFYAPWCGHCKKLAPEYEKAASILSKEDPPLILAKVDANEEKNKALATEFGVSGFPTMKILRFGGSVVQDYKGPREADGIVAYVKKQSGPASVEIKTAEDATSFVDEKKIVIVGVFPEFSGEKFDNFTTVAERLRSDYEFGHVLDAKLLPRGELSISAPTVRLFKPFDELVVDFQEFNVDDLVKLIEESSVPLVTLFNNDPNNHPFVIKFFNTEHDKAMLFLNFSSENIDAFKSKYRDVAEQYKGKGIAFLLGDLEASQGAFQYFGLKEDQVPLIVIQTNDGEKYLKTHLEPDHIASWVKDYKDGHVKPYKKSEPIPEVNNEPVKVVVADTLQDFVFNSG…	---NA---	0	214.013	58	27	115	27	1	501	56	5.11	1767	27	0	2.181	3.63	1.664	1.12	1.86	0.74	0.014396	0.000127893	0.137664	0.0453057	0.000656641	0.513933	5929.9	12932.7	21526	2.23	5.67	3.79	5762.5	5913	6083.9	5946.8	12456.1	12009.3	13480.7	13427.6	20908.4	20896.2	22446.8	22162	5762.5	5244.9
High	CDP11723	pep chromosome:AUK_PRJEB4211_v1:8:5470094:5477330:1 gene:GSCOC_T00034195001 transcript:CDP11723 description:Secretory carrier-associated membrane protein 4 [Source:Projected from Arabidopsis thaliana (AT1G32050) UniProtKB/Swiss-Prot;Acc:Q9C6X2]	MNRSSDPNPFDEEEQEVNPFSKGNAAPGSKSRVPQFVSNTLGFGQKHDATVDIPLDSMNDSKKKQKELADWEADIKRRERDIKRREDAVASAGVPADDRNWPPFFPIIHHDIANEIPVHAQRLQYLAFASWLGIVLCLVFNVIAVTVCWIRGGGVKIFFLSIIYALLGCPLSYVLWYRPLYRAMRTDSAFKFGWFFLCYLIHIGFCILAAIAPPIVFHGRSLTGILAAIDVFSDHVLVGIFYLVGFGLFCLESLLSLWVVQKVYMYFRGHK	Secretory carrier-associated membrane protein 4; Short=Secretory carrier membrane protein 4	0	23.86	17	4	11	4	1	271	30.7	8.02	233	4	0	2.173	1.322	0.609	1.12	0.4	-0.72	0.153403	0.896048	0.538469	0.326603	1	1	752	1633.8	994.3	36.56	38.92	49.19	523.3	563	1004.4	1078.3	1168.6	1124.6	2338.1	2284.3	644.3	618.7	1598.8	1534.5	523.3	499.4
High	CDP08884	pep chromosome:AUK_PRJEB4211_v1:2:52054104:52057203:-1 gene:GSCOC_T00028010001 transcript:CDP08884 description:CAD1 [Source:Projected from Arabidopsis thaliana (AT1G72680) UniProtKB/TrEMBL;Acc:A0A178WLT3]	MSSANDNEDCLGWAARDPSGYLSPYKFSRRAIGSEDVSLDITHCGICYADVAWTRNKGGHSKYPLVPGHEITGVVRQVGFRVKHFKVGDHVGVGTYVNSCRECEYCNDGLEVHCSKGPVLTFDGIDVDGTVTKGGYSSYIVVHERYCFRVPDNYPLELAAPLLCAGITVYTPMIRHNMNQPGKTLGVIGLGGLGHLAVKFGKAFGLKVTVFSTSLSKKEEAVSRLGADNFVVSSDEQQMSALANSLDFIIDTAAGDIPFDPYLSLLKTAGVLVLVGFPSEVKFSPVTLILGMKTVSGSVTGGTKQTQEMLNFCALHKIYPEIEVVPIQYSNEALERMIKKDVKYRFVIDIANSLK	Probable cinnamyl alcohol dehydrogenase 1; Short=AtCAD1	0	25.585	20	4	10	4	1	355	38.6	7.01	283	4	0	2.172	2.142	0.986	1.12	1.1	-0.02	0.556825	0.606814	0.999987	0.904775	0.866639	1	214.2	465.4	458.8	58.99	51.47	48.32	118.6	125.1	366.7	384.8	288.4	289.3	758.3	748.6	301.9	271.1	697.2	698.5	118.6	111
High	CDP19334	pep supercontig:AUK_PRJEB4211_v1:scaffold_438:29276:31669:1 gene:GSCOC_T00010155001 transcript:CDP19334	MHIIITDAGNQVELVEPAVKGTLNVLKACSEANVKRVVAVSSVAAVVVSPNRHKGEIIDETCWSDGEYCKTTNNWYCYSKTVAESEALQYAKETGLDVLTVCPSFVLGPMLQHDVNASSLALIKLLKEGYEEIENKFRDMVDVRDVAEALLLVYGRPEAEGRYICSSHLTTTKDTVEILRKNYPNYKYPKRFIEVKDDQGRGNVSSGKLQRLGWRYRPVEETLVDSVESYQQAGILD	Cinnamoyl-CoA reductase 1; Short=PhCCR1; AltName: Full=Coniferylaldehyde synthase	0	22.944	26	4	8	3	1	237	26.5	5.53	301	4	0	2.17	2.734	1.26	1.12	1.45	0.33	0.239794	0.0814192	0.965316	0.470975	0.163485	1	227.2	493	621.2	40.21	50.12	49.28	154.1	163.4	316.1	338.1	311	310.8	781.5	793.7	394.1	394.7	985.6	977.7	154.1	144.9
High	CDP02789	pep chromosome:AUK_PRJEB4211_v1:7:6568059:6572850:1 gene:GSCOC_T00040286001 transcript:CDP02789	MAASKTAVIAWGSGEDGQLGMGNNEEKDWVCSIKALEPFDVCSIVAGSRNSLAICNDGKLFTWGWNQRGTLGHPPETKTESIPSQVKALSKVKIVQAAIDGWHCLAVDDQGRAYAWGGNEYGQCGEEPERKADTGKPVRRDIVIPQRCVPKLTVRQVAAGGTHSVVLTREGHVWTWGQPWPPGDIKQISTPVRVQGLESVRLIAVGAFHNLALLDDGILMAWGNNEYGQLGTGDTQPRSQPVPVQGLSGLTLVDIAAGGWHSTALTDEGEVYGWGRGEHGRLGFGDDKSSKMVPQRVQLLICEDIVQVACGGTHSVALTRDGRMFSFGRGDHGRLGYGRKVTTGHPSEVPINIPPPRDLSEGEAEGRWCAKSVACGGRHTLAIVEWRSRESEQLPHAPT…	Ultraviolet-B receptor UVR8; AltName: Full=Protein UV-B RESISTANCE 8; AltName: Full=RCC1 domain-containing protein UVR8	0	17.342	13	4	4	4	1	401	43.2	6.79	109	4	0	2.163	2.998	1.386	1.11	1.58	0.47	0.697427	0.353254	0.970461	1	0.569165	1	152	328.8	455.6	70.62	79.49	74.33	76	74.1	317.8	303.9	147.6	127.2	754.8	732	214.1	207.6	976	969.3	76	65.7
High	CDO96764	pep chromosome:AUK_PRJEB4211_v1:2:12876933:12883872:-1 gene:GSCOC_T00013886001 transcript:CDO96764	MANNYQGRGTLVRKLSCGITKLRISPIWAPHFQRREQSSQAYLGIFLWETSFSALVLIPRSFCGVMGVIELLGNTTLSSLCIDRPKPIWPFEGKQQSICSRGNRGLQTSISIMASSTVPAAAVNEKDDGEQLECLSKVSGDSFIRSHLRKLKPYQPILPFEVLAAQLGRKPEDIVKLDANENPYGPPPEVFEALGAMKFPYIYPDPESRRLRAALAEDSGLGSEYILAGCGADELIDLIMRCVLDPGDKIVDCPPTFTMYEFDAAVNGAFVVKVPRNSDFSLDVERIVQVVEQEKPKCIFLTSPNNPDGSIIGDDTLLKILDLPILVVLDEAYIEFSGIESKMQWVKKHENLIVLRTFSKRAGLAGLRVGYGAFPLSIIEYLWRAKQPYNVSVAAEVSA…	Histidinol-phosphate aminotransferase, chloroplastic; AltName: Full=Imidazole acetol-phosphate transaminase; Flags: Precursor	0	19.327	19	5	7	5	1	500	55.5	7.85	69	5	0	2.157	1.972	0.914	1.11	0.98	-0.13	0.00895001	0.0269307	0.97748	0.030313	0.0620458	1	221.1	476.9	435.9	3.22	7.09	5.68	226.6	217.5	211.1	224.7	536	486.4	467.5	458.7	459.3	451	421.3	406.8	226.6	192.9
High	CDP18733	pep chromosome:AUK_PRJEB4211_v1:5:23682942:23687899:-1 gene:GSCOC_T00002665001 transcript:CDP18733	MENLDSSVVARSRLAVLSAHLSASASASHDHSDAVPSSILERSCVSAQSVPPPPNVKGALTIIDERTGKKYQVQVSEEGTIKATDLKKITAGPIDKGLKLYDPGYLNTAPVRSSICYIDGDAGILRYRGFPIEELAEGSSFVEVAYLLMYGNLPSESQLADWEFAISQHSAVPQGILDIIQAMPHDAHPMGVLVSAMSALSVFHPDANPALRGQDLYKSKQVRDKQIVRILGKAPTIAAAAYLRMAGRPPVLPSNNLSYSENFLYMLDSLGNRLYKPNPRLARVLDILFILHAEHEMNCSTAAARHLASSGVDVYTALAGAVGALYGPLHGGANEAVLKMLSEIGTVDKIPEFIEGVKSRRRKMSGFGHRVYKNYDPRAKVIKKLAEEVFSIVGRDPLI…	Citrate synthase 5, mitochondrial; Flags: Precursor	0	37.926	23	10	20	10	1	517	56.7	8.82	374	10	0	2.155	4.549	2.111	1.11	2.19	1.08	0.00293841	1.60028e-06	0.00337905	0.0120807	1.85471e-05	0.0345588	1289.9	2780.2	5867.7	22.2	13.66	20.18	1054.4	1081.9	1608.3	1537.7	2491.2	2416	3102.6	3116.4	4788.6	4964	6938.8	6935.9	1054.4	959.7
High	CDP01601	pep chromosome:AUK_PRJEB4211_v1:7:10338464:10341800:1 gene:GSCOC_T00036702001 transcript:CDP01601	MASTKSPEEEHPVKTFGWAARDSSGVLSPFKFSRRATGEKDVRFKILYCGICHSDLHIARNELGWTTYPLVPGHEMVGTVTEVGCKVTKFAVGDTVGVGCLVGSCGSCDNCCSDLENYCPKFIMTYQSVDHDGTVTRGGYANEMVADEHFVIRIPENLPLAAAAPLLCAGVTVYSPMRYFGFDKPGSHIGIVGLGGLGHVAVKFAKAFGVKVTVISTSPSKKDEAINLLGADEFLVSRDPDQMKAASGTMDRILDTVSANHPIMPLIDLLKTNGQLVLVGLPDKPFELAVFPLILGRKGVNASSIGGLKETQEMIDFAAKHNISAEIELVPMDYMNTAFDRLAKNDVKYRFVLDIANTMVVP	Probable mannitol dehydrogenase; AltName: Full=NAD-dependent mannitol dehydrogenase	0	13.201	9	2	6	1	1	362	39.1	6.38	105	2	0	2.151	2.803	1.303	1.11	1.49	0.38	0.00421479	0.000312348	0.602914	0.0161459	0.0013902	1	132.6	285.2	371.7	6.93	12.65	26.81	127	132.9	132.3	148.7	328.4	310.1	253.1	262.4	462.3	467.5	281.3	298.9	127	117.9
High	CDP05316	pep chromosome:AUK_PRJEB4211_v1:2:3259610:3260536:1 gene:GSCOC_T00020313001 transcript:CDP05316	MAYPILPLLILSLSLSWIPAKSDAAAAATSFIRAKCRTTTYPSLCVESLSTFAATIQRSPNQLAQTALSVSLDRAQSTRAFVAKLSKFRGLKGREYAALRDCLEQMADSVDRLGNSVQEIKNLGRSRGPELFWHISNAQTWVSAALTDDSTCADGFAGRTLNGRVKSSITTRMTNVAQVTSNALALINQMAGGNY	21 kDa protein; AltName: Full=1.2 protein; Flags: Precursor	0	24.968	29	4	8	4	1	195	21	9.63	245	4	0	2.151	2.513	1.168	1.1	1.33	0.22	0.821698	0.644105	0.99728	1	0.905965	1	92.9	199.7	233.4	46.47	86.02	84.91	138.5	145.5	59	62.3	481.8	490.7	82.8	59.8	586.5	583.6	93.3	85.2	138.5	129.1
High	CDP01101	pep chromosome:AUK_PRJEB4211_v1:10:5576777:5580741:-1 gene:GSCOC_T00034616001 transcript:CDP01101	MADVGTAKPPSLSEQYLLKGKEETFEVITKPVEEAEVKTSENITVAEEVVEKAEDTPVVENSEVPPTGADGSSEASDTAAGESTEATPAAEAGSGDDTPASESAESEVAGDQESIEDAPHFTLETAPADFRFPTTNQTRHCFTRYIEYHRCIAAKGEGASECQKFAKYYRSLCPGEWIDRWNEQRENGTFPGPL	---NA---	0	25.696	34	4	7	4	1	194	21	4.36	111	4	0	2.149	2.242	1.043	1.1	1.16	0.06	0.00771245	0.00521479	0.999585	0.026954	0.0146035	1	356.2	765.5	798.7	24.39	27.57	21.05	297.2	290.8	427	468.6	600.3	603	986	971.8	658.7	666.2	957.6	958	297.2	257.9
High	CDP00629	pep chromosome:AUK_PRJEB4211_v1:11:27446380:27450469:1 gene:GSCOC_T00032632001 transcript:CDP00629	MKLALTSTFRPLVPPKLSPFDQNLASSNMIFRPSVTLTPRMRETVIMMAQKKKPKIEGVSDELNSIASQNLDFAPARRRVRLAFSNVQQQLDHVLFKMASSGIRTDEWYEINSKGQEIFCKSWLPKPGVRIKGALCFCHGYGDTCTFFFEGIAKYIAASGYGVYAIDHPGFGLSEGLHGYVPSFDGIVNNALELYNIIKGRPEIVGLPRFVFGQSMGGAIALKALLKDPNEWDGIILVAPMCKIAEEMTPPVPLQKILILLSKVMPTAKLVPQKDLAELAFRELKKRKMADYNVICYSDQTRLKTAVELLNATRYIESQVDKVASPMLILHGAADKVTDPQVSKFLYERASSKDKTLKLYEGAYHSILEGEPDDRILEVLSDIISWLDSRCSMKN	Caffeoylshikimate esterase; AltName: Full=Lysophospholipase 2; Short=LysoPL2	0	7.515	6	1	2	1	1	395	44.1	8.68	66	1	0	2.148	2.393	1.114	1.1	1.26	0.16	0.0384813	0.0191263	0.995171	0.103446	0.0458203	1	97.1	208.6	232.4	30.72	17.27	26.23	71.2	75.4	127.5	125.1	183.2	182.2	237.5	253.9	191.6	178.1	301.6	281.9	71.2	66.9
High	CDP10535	pep chromosome:AUK_PRJEB4211_v1:6:5736977:5739955:-1 gene:GSCOC_T00031293001 transcript:CDP10535	MSLLDLIKLNYNYNLNELATILDPALVKKIGAATALEVRATGIQYAFAPCIAVCRDPRWGRCYESYSEDPKIVSAMTEIIPGLQGEIPSNGRLGVPYLAGQKNIAACAKHFVGDGGTTEGINGNNTVISRHGLLSIHMAGYYNAIIKGVSTVMISYSSWNGIKMHANREMITGFLKNTLRFRGFVISDWQGIDSITSPPHANYTYSIVAGVSAGIDMMMIPYNYTEFIDGLTFLVKNNFVPMSRIDDAVKRILRVKFTMGIFEHPLADYSMTKYVGLQEHRDLAREAVRKSLVLLKNGESAAKPLLPLPKKAKRILVAGTHADNIGNQCGGWTIEWQGLSGNITKGTTILTGIRNAVDPTTEVVYSEKPDAEFVKSNKFSYAVVVVGEPPYAETVGDSL…	Probable beta-D-xylosidase 2; Short=AtBXL2; Flags: Precursor	0	44.633	19	8	20	1	1	458	49.7	8.12	389	8	0	2.137	1.098	0.514	1.1	0.13	-0.96	0.437381	0.999337	0.56506	0.753667	1	1	263.8	563.8	289.5	58.98	61.18	57.13	475	450.5	145.9	154.5	1029.1	993.3	302.4	320	495.9	503.7	168.9	169	475	399.6
High	CDO99619	pep chromosome:AUK_PRJEB4211_v1:2:10694075:10698270:-1 gene:GSCOC_T00029265001 transcript:CDO99619	MDITKMDRGQITTVGSGFCVLLTVHYTVQLLSQHLFYWKNPKEQKAIIIIILMAPVYAVDSFVGLLDFQGSKAFFMFLDSIKECYEAFVIAKFLALMYSYLNISISKNIVPDEIKGREIHHSFPMTLFQPRTTRLNHQTLKLLKYWTWQFVIIRPVCSLLMITLQLLGIYPRWVSWTFSIILNMSFFLAMYSLLAFYHVFAKELKPHKPLAKFICIKGIVFFSFWQGMVLDILAAAGIIRSQHFWLDVEHVEEAIQNLLICVEMVAFSVIQQYAYHVAPYTGDVEALLKSRKKYE	Protein LAZ1; AltName: Full=Lazarus1	0.004	2.112	3	1	2	1	1	295	34.3	8.78	22	1	0	2.133	3.305	1.55	1.09	1.72	0.63	0.127791	0.00564942	0.429479	0.285085	0.0156298	1	147.2	313.8	486.4	35.49	31.99	35.07	191.9	214.8	105	112.9	397.4	400.3	207.5	247.8	681.7	646.4	366	345.4	191.9	190.5
High	CDP04140	pep chromosome:AUK_PRJEB4211_v1:9:3658375:3669061:-1 gene:GSCOC_T00017446001 transcript:CDP04140	MASRAILWRKKYLFDSLNRPKYLLHCCSSFEHGSSSMIPDSWNQSRGVRYASSTCDQTNETEPNLTKDELLTNVARGYLRHNSCMIPNLGSRNGIGGSSLGVKWITEYARQYSTAAAGQPDLGQDDNKNEESTVKQKKEASPEECDQAVEGLSTVKAKAKAKQLQDTQKDAKPMIKRIWAMLLGIGPALKAVASMSREDWAKKLRHWKDEFKTTMQHYWLGTKLLWADVRISSKLLYKLASGKGLSRRERQQLTRTTADIFRLVPFAVFIIVPFMELLLPVFLKLFPNMLPSTFQDKMKEQEALKRKLNARIEYAKFLQETVKEMANEVKDLRSGEIKKTAEDLDEFLDKVRRGNTVSNDEILAFAKLFNDELTLDNISRPRLVNMCKYMGIKPFGTDA…	Caltractin; AltName: Full=Centrin	0	58.724	17	8	20	6	1	755	85.8	6.23	611	8	2	2.131	2.518	1.182	1.09	1.33	0.24	0.0102848	0.00173131	0.88336	0.0342617	0.00566365	1	743	1583.5	1871.2	8.27	12.82	10.55	672.6	701.3	787.2	794.3	1443.1	1369.8	1767.7	1737.6	1737.8	1692.2	2092.2	2014.9	672.6	622.1
High	CDP18357	pep supercontig:AUK_PRJEB4211_v1:scaffold_230:76786:79490:-1 gene:GSCOC_T00013590001 transcript:CDP18357	MLPTFDPTDTEAGSRILEDITSNAGHIQEQVLEEILTKNASTDYLKGFLNGHSDKGLFKNKVPVVDYEDIKIYIDRIALDGEPSRILTNESITELLKSSGTSGGKQKWIPKTAEEGERRAFICCLRDTVLNRYLQGLSDGKALLFVLINPDIHTPGGLVLRTASESEIKNRKDRYPQFILCEDTNQSLYGQLLCGLVQRDAIVSVGTFFASGLLRIIKFFEEHWQEMSSNIRTGQISAWITDPNCKRAVSLILSKQMPDLADSIDLVCQEKSWEGIIKKIWPRTKYVLATITGSMAQYIPALEFYTGGLPVVSSLYGSSEAFFGINMKPLCSPYDVSYTFIPNMAYYEFLPIDNHQDPNCTNRKDAHLKDHIVDLANVKIGQHYELLVTTFTGLYRYRM…	Indole-3-acetic acid-amido synthetase GH3.17; AltName: Full=Auxin-responsive GH3-like protein 17; Short=AtGH3-17	0	12.65	9	3	8	2	1	582	65.9	6.13	73	3	0	2.129	2.417	1.135	1.09	1.27	0.18	0.772118	0.669373	0.99971	1	0.933017	1	276.2	588	667.6	68.38	77.33	81.96	129.4	144.6	541.2	527.4	265	251.8	1304.4	1307.4	258.4	282.1	1603.5	1579.9	129.4	128.3
High	CDP01759	pep chromosome:AUK_PRJEB4211_v1:7:8950601:8954054:-1 gene:GSCOC_T00036915001 transcript:CDP01759	MEKPAMSIEEVVAEIMRMHRSLPTRPTIEEVEAAKTLIRNVEKEDQARIEAISRQIKAKNVPDELFKILQEMQKNMVYFQSKEQQKEAVKLLDLEHVHCVFDDLIQRASKCLSPSGSSQSNTNNESLSYSTSYSRDSSSMSLSTSASFSGNSINSPATTTTNTSTATTSSSLSTFYNEKDIVKASELFSKDDSYLKKAKGTFHVEGLRVGRRSGEFSTTPQIVDSTLKPVINVGQEGEKLSLIKLASLIEVSSKKGTRELNLQGKLMDQVEWLPDSLGKLSSLITLDLSQNRIVALPDTIGGLSSLQKLDLHSNRIIELPESIGDLLNLVSLNVSGNQLRSLPAKFARLVRLQELNLSSNSLSALPDTIGSLVSLKTLNVETNDIEEIPHTIGQCSSLK…	---NA---	0	6.646	3	1	2	1	1	586	65.2	7.74	51	1	0	2.128	1.474	0.692	1.09	0.56	-0.53	0.0806727	0.623922	0.633882	0.195049	0.88327	1	176.6	375.9	260.3	11.07	10.22	16.88	189.4	191.7	152	164.7	432.3	399.4	353.8	350.3	295.4	302.5	217.2	229.3	189.4	170
High	CDP17108	pep chromosome:AUK_PRJEB4211_v1:1:37434345:37440398:-1 gene:GSCOC_T00005027001 transcript:CDP17108 description:Sucrose synthase (Fragment) [Source:Projected from Arabidopsis thaliana (AT4G02280) UniProtKB/TrEMBL;Acc:W8Q6L8]	MATIKLQKLPSIRERVEDTLSAHRNELIALLSRYVAQGKGMLQPHHLIDELDNIVVDETACKKLSQGPFSEVLRSAQEAIVLPPFVAIAVRPRPGVWEYVRVNVYELSVDQLSISEYLHLKEELVDGRSEDHLVLELDFEPFNATFPRPTRSSYIGNGVQFLNRHLSSIMFRNKDSLEPLLDFLRAHKHKGHVLMLNDRIQRISRLESALSKAEDYLAKLPQDTPYSDFEYALQELGFERGWGDTAARVLNMMHLLSDILQAPDPSTLETFLGRIPMVFNVVILSVHGYFGQANVLGLPDTGGQIVYILDQVRALENEMLLRIKQQGLNVTPRILIVTRLIPDAKGTTCNQRLERVSGTEYTSILRVPFRTEKGILRKWISRFDVWPYLETFTEDAANE…	Sucrose synthase 2; AltName: Full=Sucrose-UDP glucosyltransferase 2	0	59.004	27	17	31	15	1	811	92.8	6.35	291	17	0	2.122	1.187	0.56	1.09	0.25	-0.84	0.00306221	0.852619	0.0210971	0.0123992	1	0.133464	1890.5	4011.1	2244.3	13.95	16.76	21.88	2122.9	2161	1683.5	1678.1	4770.7	4539.9	3543.9	3431.1	2698.6	2724.6	1829.8	1866.5	2122.9	1916.8
High	CDO97159	pep chromosome:AUK_PRJEB4211_v1:2:16904132:16905639:1 gene:GSCOC_T00014413001 transcript:CDO97159	MAANSPEILHDFSPMIRVYKDGRVERLLGKDIVAASVDPETGTESKDVQISPELNISARLYLPKTPRQDKKLPLLVYFHGGGFVVESAFSPPYHTHLNAVVAEAGVVAVSINYRLAPEHPLPTAYEDSWIAVKWVASHSNGQGPEVWLRDYVDFDSVFFGGDSAGGNLAHNMALRVGLEKLDGFNLDGIFLNCPYFWGKEAIGVELKNLEMKAYVEVLWHYIHPKSAGADDPLVNPVMEPNLSRLGCKRVLVYVAEKDILKERGWIYKEALEKSEWGGDVEVVEVAGENHVFNLFFPKGENALSLLKKLAAFINNKNDV	Probable carboxylesterase 7; AltName: Full=AtCXE7	0	57.645	30	10	17	10	1	319	35.4	5.66	386	10	0	2.117	2.153	1.017	1.08	1.11	0.02	0.016992	0.0133369	0.999938	0.052342	0.033641	1	1394.9	2952.6	3003	20.21	7.45	9.44	1160.8	1188.5	1702.8	1637.1	2823.4	2675.7	3135	3087.8	2832.5	2709.6	3310.4	3183.9	1160.8	1054.2
High	CDP13337	pep chromosome:AUK_PRJEB4211_v1:11:32929186:32931619:1 gene:GSCOC_T00038238001 transcript:CDP13337	METSDLELKHLGFVRAIASIAVVWLSCLYDYAKQNSGPLKSTVGTVENAVTTVVGPVYERFKGLPDDLLARLDTKVDNVSKKFDEHAPPVAKKIVNRAKNVVQKGSQVAQDLVQQAQVGGPRAALRHVASLSKNIAVRLLAVLWHRLINRYPPLHGVGGIAIPTVADMSNKYNKFIAKLDGRGYHIFSYFPSVPVEDVAEAYKQVEAAAAKKDVGVTSSETD	REF/SRPP-like protein At1g67360	0	18.462	25	3	5	3	1	222	24.1	9.28	131	3	0	2.116	1.311	0.619	1.08	0.39	-0.69	0.259877	0.933618	0.661679	0.502712	1	1	467.5	989.3	612.7	56.42	46.46	38.94	274.9	272.4	798.1	795.1	655.6	622	1503.5	1493	437.1	423.3	875.9	859	274.9	241.6
High	CDP18654	pep chromosome:AUK_PRJEB4211_v1:6:15338028:15343121:1 gene:GSCOC_T00004148001 transcript:CDP18654	MHSKFLYQSEHLSTELKDFVAIGKLFVSMGGAPAFVADDLPGDYPNGFDLKSEGHNTVVNVGNKTYLIGGTDHGSKSTIGVRVSDKRTGGWVTPTVLGTRPKPSEVISAVILNEDRIFILKGDSSPDDCFWFLEVDTPFVQEKRKEFGTEVVAWSKGVVGDAKKPIVISGPSGVGKGTLISALMKEFPSTFGFSVSHTTRAPREREQNGVHYHFTERSVMAEEIRDGKFLEFAEVHGNLYGTSIEAVEVVADAGKRCILDIDVQGARSVRASSLEAIFIFVCPPSFEELEKRLRARGTETEQQIQKRLQNAKAELEQAKSQGLFDHMLVNDDLETCYASLKKLLDLDEAVEIINESSPPLVDLPRDHSVSKIDKKILISCGTRERASKNIFLLDLSSLK…	---NA---	0	5.971	8	2	2	2	1	452	49.6	5.43	40	2	0	2.113	1.97	0.932	1.08	0.98	-0.1	0.124125	0.158953	0.999874	0.279037	0.28733	1	101.2	213.9	199.4	19.11	15.44	43.03	105.7	139.5	94.2	96.9	158	207	221	227.4	141.1	122.4	292.7	281.6	105.7	123.7
High	CDP18904	pep supercontig:AUK_PRJEB4211_v1:scaffold_304:5835:7638:1 gene:GSCOC_T00007408001 transcript:CDP18904	MSFMQGKWFKLDQKGAGPGARSSHAISIVGDKVYAFGGEFTPRIPVDNALYVFDLVERTWSVAEATGDIPPPRVGVSMTSIGDIIYVFAGRDATHKELNELYSFDTSSNRWTLLTSGDTGPENRSYHSIAADGRCLYVFGGCGVSGRLNDLWAYDVIDGKWTKFPAAGENCKPRGGPGLAVSLGKIWVVYGFSGVEIDDVHYFDLVEEKWIQVETTGEKPTPRSVFSTLGIGKYIFISGGEIDPSDLGHLGAGKFAAEVYALDTETLAWKKVEDGSNSVEHPGPRGWCAFAGGKLDGQEGLLVYGGNSPSNDRLEDIYFFCPSLFENGK	Nitrile-specifier protein 5; Short=AtNSP5	0	52.434	38	7	16	7	1	329	35.7	5.1	287	7	0	2.106	1.623	0.771	1.07	0.7	-0.38	0.00696829	0.0939631	0.652795	0.0248575	0.183881	1	466.5	982.5	757.1	25.56	23.88	16.31	362.9	377.4	583.9	576.5	772.3	805.3	1198.8	1199.5	655.5	662.4	884.8	865.5	362.9	334.8
High	CDP05711	pep chromosome:AUK_PRJEB4211_v1:5:10848993:10856178:-1 gene:GSCOC_T00020943001 transcript:CDP05711	MRGLFFGFSFILICIELFVGANALYGPSSPVVQLNPSNFKSKPSAFSFSPVVQLNPSNFKSKVLNSNGVVLVEFFAPWCGHCKALTPTWEKAASVLKGVATVAALDADAHQSLAQEYGIKGFPTIKVFAPGKSPVDYQGARDVKPIAEFALQQIKALLKDRLNGKATGGSSEKSEKSEPSVSVELNSHNFDDLVLKSKDLWIVEFFAPWCGHCKRLAPEWKKAANNLKGKVKLGHVDCDAEKSLMSRFNVQGFPTILVFGADKDSPSPYEGARTASAIESFALEQLETNVLPPEVTELTGPDVMEEKCGSAAICFVAFLPDILDSKAEGRNNFVWAAAGKQSDLEKQVGVGGYGYPALVALNVKKGAYAPLKSAFGRDQIIEFVKEAGLGGKGNLPLGV…	Protein disulfide isomerase-like 2-3; Short=OsPDIL2-3; AltName: Full=Protein disulfide isomerase-like 5-1; Short=OsPDIL5-1; Flags: Precursor	0	49.611	30	5	26	5	1	438	47.2	5.47	333	5	0	2.105	2.468	1.173	1.07	1.3	0.23	0.0124068	0.00290238	0.940809	0.0401756	0.00879722	1	690.5	1453.3	1704.4	5.59	3.85	20.34	710.1	740.2	653.9	671.5	1545.4	1432.7	1474.2	1419.8	2066.6	1992.5	1457.9	1392.1	710.1	656.6
High	P92533	NADH-ubiquinone oxidoreductase chain 3 OS=Arabidopsis thaliana OX=3702 GN=ND3 PE=2 SV=2	MMLEFAPIFIYLVISLLVSLILLGVPFLFASNSSTYPEKLSAYECGFDPFGDARSRFDIRFYLVSILFLIFDLEVTFFFPWAVSLNKIDLFGFWSMMAFLFILTIGFLYEWKRGALDWE	---NA---	0.006	1.828	13	1	2	1	1	119	13.9	4.56	20	1	0	2.096	2.625	1.252	1.07	1.39	0.32	0.0794966	0.0157357	0.897902	0.192636	0.038781	1	123.8	259.6	325	24.31	23.66	25.69	153.9	148.8	95.1	103	319.8	312.8	215.4	202.9	390.7	418.6	270.2	248	153.9	132
High	CDO97086	pep chromosome:AUK_PRJEB4211_v1:2:16416934:16430947:1 gene:GSCOC_T00014321001 transcript:CDO97086	MDIDFTEYKLSSQLRGHEDDARGICICDNVGIATSSRDRTIRFWTLDQSNNRDYALSKILLGHTSFVGPLAWIPPSDEFPEGGLVSGGMDTLVFVWNLATGEKEHVLKGHQLQVTGVFLDGSDIVSTSVDCTLRRWKKGQLVEVWEAHKAAVQAVIKLPSGELVTGSSDMTLKLWKGRSCVHTYVGHTDTVRGLAFMPALGIISASHDGSIRLWALSGQLLMEMVGHTSIVYSVDAHVSGLIVSGSEDCFAKIWKDGACVQSIEHPGCVWDAKFLENGDIVTACSDGVVRIWTVHQDKIADLLELESYSSQVSQYKCSRKRVGGLKLEDLPGLDALQTPGTSDGQTKVVREGDNGVAYTWNMREYKWDKIGEVIDGPDDSLTRPVLDGIHYDYVFDVDI…	Dynein assembly factor with WDR repeat domains 1; AltName: Full=Outer row dynein assembly protein 16	0	29.53	12	5	11	5	1	758	83.6	5.6	191	5	0	2.096	2.336	1.115	1.07	1.22	0.16	0.0209499	0.00582623	0.961886	0.06242	0.0161009	1	242.5	508.2	566.5	6.05	24.83	6.22	244.8	256	221.1	240.2	593.7	614.7	435	358.1	588.7	578.2	555.1	510.5	244.8	227.1
High	CDO98831	pep chromosome:AUK_PRJEB4211_v1:3:1102655:1110602:1 gene:GSCOC_T00025764001 transcript:CDO98831	MAIRTSDLVGRVHPGQKFDADALLRYASAHVEGFPISPSDFIVSQFGHGQSNPTFLIEVHSESSVKLYVLRKKPPGKLLESAHAVEREFQVLHALGTCTLVPVPKVFCLCTDSSVIGTPFYIMEYLEGRIFIDPKLPGMSPKQRRDIYHAIAKALAFLHSVDVDAIGLGNYGKRNHYCKRQVERWAKQYLISTGEGKSERNPKMLELADWLRQHIPPEDSSGTTTGLVHGDFRIDNLVFHPIENRVIGILDWELSTLGNQMCDVAYSCLHYIANVASGDAVEENEGFELTNFPEGVPSLPEYLSYYCSAAERAWPVAEWKFYVAFSLFRGASIFAGVHCRWIMGNASGGDRARLMGQMANSLIRTAWSFIGRESVLPRQLPSDVQGNKQQKVEEESKGQ…	---NA---	0	9.872	5	3	5	3	1	829	92.2	8.13	87	3	0	2.094	4.225	2.017	1.07	2.08	1.01	0.220829	0.00499074	0.288548	0.441985	0.0140198	0.832156	232.8	487.6	983.7	10.53	37.39	29.68	218.5	209.4	248.1	262	349.4	359.1	718	662.1	762.8	753	1294.8	1268.6	218.5	185.7
High	CDP06849	pep chromosome:AUK_PRJEB4211_v1:2:38988650:38995230:-1 gene:GSCOC_T00023875001 transcript:CDP06849	MTLEEKIGQMVQIDRSVATPAVMKNYYIGSVLSGGGSTPLPQASAADWVNMVNDFQKGSLSTRLGIPMIYGIDAVHGHNNVFNATIFPHNIGLVNSNFRDPELVRRIGDATALEVRATGIPYVFAPCIAVCRDPRWGRCYESYSEDPKIIREMTDIILGLQGEIPSGSRKGVPYVAGKDKVAACAKHFVGDGGTTKGINENNTLIDRHGLLSIHMPAYYDSIIKGVSTVMISYSSWNGEKMHANRDMITGFLKDKIKFKGFVISDWEGIDRITSPPHANYTYSVEASILAGVDMVMIPFNYTEFIDDLTHLVKNKFIPMDRIDDAVERILLVKFTLGLFEDPLADLSLTNEVGKQEHRNLAREAVRKSLVLLKNGKNETDPLIPLAKKASKILVAGSHA…	Beta-xylosidase/alpha-L-arabinofuranosidase 2; AltName: Full=Xylan 1,4-beta-xylosidase/Alpha-L-arabinofuranosidase 2; Short=MsXyl2; Includes: Beta-xylosidase; AltName: Full=1,4-beta-D-xylan xylohydrolase; AltName: Full=Xylan 1,4-beta-xylosidase; Includes: Alpha-L-arabinofuranosidase; Short=Arabinosidase; Flags: Precursor	0	18.94	12	7	9	5	1	617	67.7	6.13	113	7	0	2.091	0.625	0.299	1.06	-0.68	-1.74	0.254172	0.689892	0.0252228	0.493933	0.951399	0.150531	384.6	804.3	240.3	47.13	62.3	46.43	573.8	594.6	234.3	257.8	1470.7	1463.6	435.7	441.9	364	369.3	158.6	154.1	573.8	527.4
High	CDP15732	pep chromosome:AUK_PRJEB4211_v1:5:5235909:5237409:-1 gene:GSCOC_T00015759001 transcript:CDP15732	MADYHFVYKDLEGASTQWDDIQRKLGNLPPKPPAFKPPSFTPAEDPDSKPKDKAWVDDKTEEELEDLEDDLDDDRFLQEYRKKRLAEMRELAKIARFGSVMPISGSDFVREVSQAPADVWVVVVLYKDGHADCELLLQCLEELAQRYPATKFVKIISTDCIPNYPDQNIPTLLVYNNSAVKANYVGLRSFGRKCTPEGVALVLCQSDPVLNDGQGGGEQSKKDVLDGVRKRFIEKVVTAREDDDGSSSD	---NA---	0	5.964	11	1	4	1	1	249	28	4.87	23	1	0	2.087	2.005	0.961	1.06	1	-0.06	0.427436	0.458703	0.999997	0.741783	0.708011	1	151.1	315.3	302.9	20.82	32.03	46.21	190.6	176.3	127	129.4	414.9	409.5	224.5	242.7	476.9	448.3	204.7	192.9	190.6	156.4
High	CDP17111	pep chromosome:AUK_PRJEB4211_v1:1:37407722:37410492:1 gene:GSCOC_T00005031001 transcript:CDP17111	MDKIQHRQVPVNGINLHVAEIGDGPAILFLHGFPELWYSWRHQLLSLSAKGYRALAPDLRGYGDSDAPPSPSNYTALHIVGDLVGLLDSLGLDRVFLVGHDWGAVMAWYFCLLRPDRIKALVNMSVVFTPRNPKRKPLEAMRARFGDDYYICRFQEPGEAEEEFARVDTARIIKKFLTSRRPGPLCVPKEVGFGGSPHNPIQLPSWLSEDDVNYFASKFSQKGFTGGLNYYRAMDLNWELTAPWTGLQIKVPVKFIVGDLDVTFTTPGVKEYIQKGGFKRDVPFLQELVVMEGVAHFVNQEKPEEVSAHIYDFIQKF	---NA---	0	11.144	9	3	5	3	1	317	35.9	7.01	126	3	0	2.08	4.425	2.128	1.06	2.15	1.09	0.0176783	2.19801e-05	0.0162736	0.0538762	0.000160779	0.112377	137.8	286.5	609.7	31.44	9.69	7.12	189.2	178.2	104.3	106.5	301.7	327.7	266.8	272.1	590	571.8	670.1	630	189.2	158.1
High	CDP07294	pep chromosome:AUK_PRJEB4211_v1:10:565728:573196:1 gene:GSCOC_T00024521001 transcript:CDP07294 description:Branching enzyme-I precursor (Starch-branching enzyme I) (1,4-alpha- glucan branching enzyme I) [Source: Projected from Oryza sativa (Os06g0726400)]	MPTACWNLLSQTALGALMPSSLGKDASKVSTSSTCGISKCQTRLIVGSFRAAGFPSPKSGVKHQRVQPTSAISDILTNDNSTMSTADVETENIGLFGMDSALEPYKDHFRYRIMRYVEQKKLIETYEGSLEEFAQGYLKFGFNREKGYILYQEWAPAAQEAEVIGDFNGWDGSNHRMEKNQFGVWSIKIPDCNGNPAIPHKSRVKFRFKHGNGDWIDRIPAWIKYATVDPGKFAAPYDGVYWDPPPSERYQFKYPRPPNPKSSRIYEAHVGMSSSEPRINSYREFADDVLPRIQANGYNTVQLMAIMEHSYYASFGYHVTNFFAASSRSGTPEDLKYLIDKAHSLGLRVLMDAVHSHASNNITDGLNGFDVGQSSQDSYFHTGERGYHKLWDSRLFNYA…	1,4-alpha-glucan-branching enzyme 1, chloroplastic/amyloplastic; AltName: Full=Starch branching enzyme I; Flags: Precursor	0	92.812	25	12	29	12	1	850	96.3	5.59	498	12	0	2.079	1.438	0.691	1.06	0.52	-0.53	2.80635e-05	0.0180983	0.0212574	0.000368651	0.0436758	0.1342	1590.9	3308.1	2287.3	5.63	4.18	2.86	1500.5	1549.4	1703.2	1633.5	3248.5	3100.9	3404.8	3368.9	2228.1	2275.6	2298.9	2385	1500.5	1374.3
High	CDP05193	pep chromosome:AUK_PRJEB4211_v1:2:2328012:2330639:-1 gene:GSCOC_T00020156001 transcript:CDP05193	MREILHIQGGQCGNQIGAKFWEVVCAEHGIDSTGRYKGDNDLQLERVNVYYNEASCGRFVPRAVLMDLEPGTMDSVRSGPYGQIFRPDNFVFGQSGAGNNWAKGHYTEGAELIDSVLDVVRKEAENCDCLQGFQVCHSLGGGTGSGMGTLLISKIREEYPDRMMLTFSVFPSPKVSDTVVEPYNATLSVHQLVENADECMVLDNEALYDICFRTLKLTTPSFGDLNHLISATMSGVTCCLRFPGQLNSDLRKLAVNLIPFPRLHFFMVGFAPLTSRGSQQYRALTVPELTQQMWDAKNMMCAADPRHGRYLTASAMFRGKMSTKEVDEQMINVQNKNSSYFVEWIPNNVKSTVCDIPPTGLKMASTFIGNSTSIQEMFRRVSEQFTAMFRRKAFLHWYT…	Tubulin beta-8 chain; AltName: Full=Beta-8-tubulin	0	151.005	57	19	92	2	1	447	50.2	4.89	1327	19	2	2.073	2.231	1.076	1.05	1.16	0.11	0.000104116	4.55851e-05	0.987501	0.000948898	0.000277706	1	555	1150.7	1238.3	23.27	2.74	6.34	444.1	455.6	676	677.4	1205.7	1134.1	1143.5	1157.9	1185.3	1142	1296.7	1293.6	444.1	404.1
High	CDO97092	pep chromosome:AUK_PRJEB4211_v1:2:16454588:16458247:-1 gene:GSCOC_T00014327001 transcript:CDO97092 description:4-hydroxy-3-methylbut-2-enyl diphosphate reductase, chloroplastic [Source:Projected from Arabidopsis thaliana (AT4G34350) UniProtKB/Swiss-Prot;Acc:Q94B35]	MNREYTTSDIIKKLKENGNEYTWGDVTVKLAEAYGFCWGVERAVQIAYEARKQFPTEKIWLTNEIIHNPTVNKRLEEMAIEEIPVEDGKKHFDVVDRGDVVVLPAFGAGVDEMLTLSDKNVQIVDTTCPWVSKVWNTVEKHKNGAYTSIIHGKYSHEETIATASFAGKYIIVTNMAEATYVCDYILGGQLDGSSSTKEAFMEKFKHAVSNGFDPDADLVKLGIANQTTMLKGETEEIGKLVERTMMRKYGVENINTHFLSFNTICDATQERQDAMYKLVENPLDLMLVIGGWNSSNTSHLQEIAEDRGIPSYWIDSEQRIGPGNRIAYKLMHGELVEKENFLPEGPITIGVTSGASTPDKVVEDVLVKVFDIKREEVLQLA	4-hydroxy-3-methylbut-2-enyl diphosphate reductase, chloroplastic; AltName: Full=Protein CHLOROPLAST BIOGENESIS 6; Flags: Precursor	0	68.213	42	11	22	11	1	381	42.7	5.07	425	11	0	2.072	2.193	1.059	1.05	1.13	0.08	0.0371748	0.0200315	0.997348	0.100377	0.0477685	1	952.7	1973.8	2089.3	18.84	29.77	25.35	817.5	803.7	1110.4	1141	1551.2	1458.7	2580.9	2511.5	1670.1	1696.2	2678.4	2573.4	817.5	712.9
High	CDP22170	pep supercontig:AUK_PRJEB4211_v1:scaffold_11483:379:2213:1 gene:GSCOC_T00006527001 transcript:CDP22170	MKITLIRQCTKFRLEQFRHSLVLTLLETHKRDQHLLNPTVIDSFRGYLDEVNVKFKATPGSVLITTAQGGSFCRGFDFRYVRSHARGSEDKAYKEMNDGFKDVVKDLISLPMPTIAAINGYATEAGLILALSHDHLTMKQVVEPYLRAELLSRKRSYPGYFAALIRSKVGCPLARRKLLLRDVQIDAEEAAKIGLLDWNHEVASEKDALEVAKTQADELAKKEWNGELYAEMRQLLYPELCKELELTSSHSC	---NA---	0	8.481	13	2	2	2	1	252	28.6	8.07	62	2	0	2.071	3.632	1.753	1.05	1.86	0.81	0.0183425	0.000104228	0.0562108	0.0556218	0.000549146	0.265511	172.3	356.8	625.6	20.84	35.63	24.06	203.1	208.8	140.3	146.1	235.6	271.7	486.1	468.7	774.8	767.2	510.2	500.3	203.1	185.2
High	CDP17360	pep chromosome:AUK_PRJEB4211_v1:1:4518213:4524949:1 gene:GSCOC_T00009708001 transcript:CDP17360	MDKVRRLFCSFCGNLFLPLVLVSVRPNLAVAGSVVKFLPGFEGPLPFELETGYIGVGESEDVQLFYHFVKSESNPQTDPLLIWLTGGPGCSSFGGLTSGIGPVKFQPVLCNGTLTALVTNPYSWTKVASIIFLDSPVGAGFSYARTAKASQSTDLQASEHNYEFLRKWLHDNPEYISNSFYIGGGSYAGITVPILAQLVSNGNVAGIEPHIHLKGYLLGNPAPTTQGDGNHAIPFAHRTALISDELYESLKVTCKGEYVNIDPSNAPCLKNIQAYNKLIDNINIEHVLEPTCPDVSPKPNSLFSGRRSTVETFYKKFEELDVLEFNPVQCRAATAEKLIYYWANDMSVQEALHGTIKEWVGCNYSILYTKNAGSVVPYHANLSTKGYRSLIYSGDHDMI…	Serine carboxypeptidase-like 18; Flags: Precursor	0	10.93	4	2	6	1	1	483	53.4	6.83	100	2	2	2.071	1.129	0.545	1.05	0.17	-0.88	0.561533	0.997857	0.739819	0.910427	1	1	373.1	772.6	421	31.83	77.66	74.75	486.2	475.1	293	255.7	1782.8	1708.6	335.4	349.4	921	903.4	194.5	196.2	486.2	421.4
High	CDP03083	pep chromosome:AUK_PRJEB4211_v1:6:9871682:9876841:-1 gene:GSCOC_T00041566001 transcript:CDP03083	MARVSRVALFAVVAVLVACAAGAEEGSAATFYSENPIRQVVTDGLRELETSVLQAIGNTRHALSFARFANRYAKRYETVEEIKLRFDIFRENLRIIKSHNNKGLSYTLAVNEFADMTWEEFHKHRLGAAQNCSATTKGNLKLANVVVPETKDWRTTGIVSPVKDQGDCGSCWTFSTTGALEAAYAQAFGKGISLSEQQLVDCAGAFNNFGCNGGLPSQAFEYIKYNGGLDTEEAYPYTGVDGLCKYSSQNVGVHVLDSVNITLGAEDELKYAVGTVRPVSVAFEVVNGFRFYKGGVYTSNTCGSAPMDVNHAVLAVGYGVENGIPYWLIKNSWGAEWGVDGYFKMEMGKNMCGVATCASFPVVA	---NA---	0	87.477	49	9	71	9	1	364	39.4	6.09	923	9	0	2.069	1.63	0.788	1.05	0.71	-0.34	0.000941933	0.0273624	0.433825	0.00515165	0.0628934	1	1241.6	2568.8	2024.1	4.99	7.7	7.08	1152.7	1207.2	1280.7	1277	2447.2	2442.5	2853.3	2696.4	1916.6	1879.3	2151.1	2137.7	1152.7	1070.8
High	CDP10233	pep chromosome:AUK_PRJEB4211_v1:6:12844297:12846126:1 gene:GSCOC_T00030896001 transcript:CDP10233	MIDLNPSVNSATRDASRAMDVDVVVSKPFAVVDEITEGSPAAEDGVQLGDQLVKFGCVEFGENLLQRLAAEAQTNQGRAIPVVVLRQGARVSLAVTPRPWQGRGLLGWHIQII	---NA---	0	8.294	33	1	2	1	1	113	12.1	5.14	52	1	0	2.062	2.668	1.294	1.04	1.42	0.37	0.0271246	0.00264791	0.749381	0.0772019	0.00817411	1	31.4	64.8	83.8	18.39	3.66	4.2	32.6	36.2	22.9	30.3	61	63.7	66.1	65.8	80.2	87.4	86.2	81.4	32.6	32.1
High	CDO97373	pep chromosome:AUK_PRJEB4211_v1:2:18529942:18532967:1 gene:GSCOC_T00014696001 transcript:CDO97373	MPRRSSGGRPAPRPAARPAPARNPPQPVNHAPPPAPVQASGGGSLLGNIGSTIAQGMAFGTGSAMAHRAADAVMGPRTIQHETVGSEAAAAPAPTTNSMGGSDACSVHAKAFQDCLNGYGNDISKCQFYMDMLSECRRTSGSMMSS	---NA---	0	3.45	10	1	3	1	1	146	14.8	8.88	46	1	0	2.06	1.647	0.799	1.04	0.72	-0.32	0.0387338	0.190113	0.775255	0.103952	0.334897	1	24.8	51	40.8	27.09	48.93	38.63	17	22.8	26.9	33	91.3	74.8	34.4	34.7	63.7	54	29.2	30.8	17	20.2
High	CDO98285	pep chromosome:AUK_PRJEB4211_v1:4:4223427:4227565:-1 gene:GSCOC_T00022329001 transcript:CDO98285	MERMKRKPNLRYLLLMLVVGCFFSELKASSNSEFYESFEEAIEGRWVVSQKEDYKGVWKREKSEGHDDYGLLVSEKAKKYAIVKELDEPADLKDGTVVLQYEVRLQEGLECGGAYLKYLRPQDAGWTSKEFDNESPYSIMFGPDKCGATNKVHFILKHKNPKTGEFIEHHLKFPPSVPSDKLTHIYTAILKPDNELRILIDGEEKKKADFLSAEDFEPPLIPSKTIPDPDDKKPEDWDERAKIPDPDATKPDDWDEDAPLEIVDEDAVKPEGWLDDEPEEIDDPEATKPEDWDDEEDGEWEAPKIDNPKCAEGPGCGEWKRPMKRNPAYKGKWHAPMIDNPNYKGIWKPQEIPNPSYFELDRPDFEPIAAIGIEIWTMQDGILFDNILIASDEKVAESY…	Calnexin homolog; Flags: Precursor	0	59.617	17	9	29	8	1	541	61.8	4.84	350	9	1	2.059	2.845	1.382	1.04	1.51	0.47	0.103715	0.0113375	0.763297	0.239064	0.0292498	1	1624.3	3344.7	4621	37.94	33.16	31.94	1165.1	1147.7	2264.6	2310.4	2489	2518.9	4593.8	4441.3	3553.9	3417.5	6271	6008.6	1165.1	1018
High	CDO98947	pep chromosome:AUK_PRJEB4211_v1:3:2036728:2040538:-1 gene:GSCOC_T00025929001 transcript:CDO98947	MKFPRSSFLIFLSISLSIVATSWSSSIINPSKVKQISWKPRAFVYKGFLTDEECNHLISLAKSELKRSAVADNLSGESKLSEVRTSSGMFIPKGKDPIVAGIEEKIATWTFLPKENGEDIQVLHYEYGQKYDPHYDYFADKVNIARGGHRIATVLMYLSNVEKGGETVFPNAEDLSRRRSMTSDEDLSDCGKKGIAVKPHKGDALLFFSLHPSAIPDPISLHGGCPVIEGEKWSATKWIHVDNFDKILGSTDNCTDTNENCERWAALGECKKNPEYMVGSPEIPGSCRKSCKVC	Probable prolyl 4-hydroxylase 4; Short=AtP4H4	0	20.535	26	7	9	7	1	294	32.6	7.14	108	7	0	2.056	2.469	1.201	1.04	1.3	0.26	0.786917	0.624085	0.998311	1	0.883375	1	340.4	699.9	840.4	79.63	78.62	72.88	145.1	147.2	787	803.9	308.1	297	1589.8	1596.7	386.4	404.9	1744.4	1754.7	145.1	130.6
High	CDP10300	pep chromosome:AUK_PRJEB4211_v1:3:12371903:12376086:1 gene:GSCOC_T00030980001 transcript:CDP10300	MAAPVTVPRIKLGSQGLEVSAQGLGCMGMSAFYGPPKPEPDMIKLIHHAISRGITLLDTSDAYGPHTNEILIGKALKGGNREKVELATKFAFTYEGGQFGIRGDPDYVRAACEGSLKRLGLDCIDLYYQHRIDTNVPIEVTVGELKKLVEEGKIKYIGLSEASASTIRRAHAVHPITAVQLEWSLWTRDIEEEIIPTCRELGIGIVAYSPLGRGFFSSGPKLVENLTDDDYRKYMPRFQAENLEHNKNLYEQVNAIASRKGCTPSQLALAWVHHQGKDVCPIPGTTKIENLDQNIGALSVKLSAEEMAELESIASAIKGERYESDAGTWKTSETPPLSTWKRT	Probable aldo-keto reductase 2	0	163.961	72	28	106	4	1	343	37.7	6.46	1827	28	22	2.05	2.321	1.132	1.04	1.21	0.18	0.000190202	3.5604e-05	0.86049	0.00149188	0.000225973	1	7206.6	14773.7	16725.7	1.71	2.11	2.1	7280.4	7094.6	7358.1	7133.6	15346	14769.1	14778.4	14640.7	16412.6	16457.4	16998.4	17081.1	7280.4	6293
High	CDP06106	pep chromosome:AUK_PRJEB4211_v1:5:24502065:24508234:1 gene:GSCOC_T00021492001 transcript:CDP06106	MSDKNEMKIGRRGRAAVVVLGDIGRSPRMQYHALSLACQAGLEVDIVAYGGSEPHAALLQHQSIHLHRMTQWPSVPQSLPKILRPFMLMLKPLVQFLVLLYYLCFKIPAPDVFLVQNPPSVPTLVAVKWASCLRHSAFVVDWHNFGYTLLSLTLGRGSSFVTIYRWIEKHYGRMASGAFCVTKAMQHELDQNWGIKATVLYDQPPEFFRPASIEEKHELFCRISESLSQPFGIQDCISYGMTGTGESDPNSTLFTIHTGTNIIMKQNRPAIIVSSTSWTPDEDFSILLEAALMYDRRVAGLLNEDDVSDEEILWNEICNGKQFLYPRLLFIITGKGPEKDKYEQKIRKLKLKRVAFRTMWLTAEDYPLLLGSADLGVCLHTSSSGLDLPMKVVDMFGCG…	---NA---	0	8.159	5	1	5	1	1	502	56.1	7.27	94	1	0	2.049	1.727	0.843	1.03	0.79	-0.25	0.00339485	0.0123211	0.954805	0.01351	0.0314827	1	49.1	100.7	84.9	7.56	11.22	9.16	47.3	45.9	51	54.2	98.1	104.4	80.9	103.3	98.8	85.2	80.4	84.6	47.3	40.7
High	CDP09742	pep chromosome:AUK_PRJEB4211_v1:8:29564157:29572767:1 gene:GSCOC_T00030195001 transcript:CDP09742	MGCECSKPSCCWTAEQYGPGHEALNAENEEKSEVSDLPVFREFTIEQLKIATSGFAVENIVSEHGEKAPNVVYRGKLENQRRIAVKRFNRSAWPDSRQFLEEARAVGQLRNHRLANLLGCCYEGDERLLIAEFMPNETLAKHLFHWEAQPMKWAMRLRVALFVAQALEYCTSKGRALYHDLNAYRIVFDDDGNPRLSCFGLMKNSRDGKSYSTNLAFTPPEYLRTGRITPESVMYSFGTLLLDLLSGKHIPPSHALDLIRDRNLQMLTDSCLEGQFSSDDGTELVRLASRCLQYEPRERPNPKSLVASLIPLQKEIEVPSHVLMGIPHGGEAMSLSPLGEACQRMDLTAMHEILEKLGYKDDEGAATELSFQMWTNQMQETLNSKKKGDVAFRHKELMA…	Serine/threonine-protein kinase BSK7; AltName: Full=Brassinosteroid-signaling kinase 7	0	14.228	9	4	5	4	1	489	55.1	5.94	120	4	0	2.049	1.123	0.548	1.03	0.17	-0.87	0.894592	0.999891	0.940505	1	1	1	210.4	431.2	236.3	93.14	90.3	84.5	73.4	60.5	603.3	640.9	146.5	156.4	1272.5	1188.8	97.8	83.5	597.1	570.5	73.4	53.7
High	Q42534	Pectinesterase 2 OS=Arabidopsis thaliana OX=3702 GN=PME2 PE=2 SV=2	MAPIKEFISKFSDFKNNKKLILSSAAIALLLLASIVGIAATTTNQNKNQKITTLSSTSHAILKSVCSSTLYPELCFSAVAATGGKELTSQKEVIEASLNLTTKAVKHNYFAVKKLIAKRKGLTPREVTALHDCLETIDETLDELHVAVEDLHQYPKQKSLRKHADDLKTLISSAITNQGTCLDGFSYDDADRKVRKALLKGQVHVEHMCSNALAMIKNMTETDIANFELRDKSSTFTNNNNRKLKEVTGDLDSDGWPKWLSVGDRRLLQGSTIKADATVADDGSGDFTTVAAAVAAAPEKSNKRFVIHIKAGVYRENVEVTKKKTNIMFLGDGRGKTIITGSRNVVDGSTTFHSATVAAVGERFLARDITFQNTAGPSKHQAVALRVGSDFSAFYQCDM…	Pectinesterase 2; Short=PE 2; AltName: Full=Pectin methylesterase 2; Short=AtPME2; Flags: Precursor	0	12.447	5	3	7	2	1	587	64.1	8.94	199	3	0	2.049	0.995	0.486	1.03	-0.01	-1.04	0.0119361	1	0.0127806	0.0389234	1	0.0924621	487.7	999.3	485.4	3.39	3.81	6.8	467.7	500.9	476.6	499.1	1068.7	1006	983	992.7	534.5	491.6	454.9	479.3	467.7	444.3
High	CDO98281	pep chromosome:AUK_PRJEB4211_v1:4:4183768:4189819:1 gene:GSCOC_T00022322001 transcript:CDO98281	MCRTRLLGWTRLLEFSAVCVLLLNGGTAAKNEACTASDFQDDHHRVLAANRTNMVSSYKKIWEIVYQGVWGQSSTCMCSRKLDVHSSECLKKIRHDSELQSLFKILDASFFSDNKVQEIEKAAKEFNVPIIKTNRKLVASENGGLHYPSYLVFNPARTNESLQQATKRFSHPSLEGVRRPKSDENIAFMSVLELGQLIKTKQITSEELTGIFIRRLKRYGPVLESVVTITEELAYKQAKEADHLLVKGKYLGPLHGIPYGLKDIIAVPHYRTTWGSKTFKDQVLDIEAWVYKRLRSAGGVLVAKLVSGSLAYDDIWFGGRTRNPWNIEEYSTGSSAGPAACTSAGMVPFAIGSETSGSITYPAARCGVTALRPTFGTVGRTGVMSISESLDKLGPFCRS…	Glutamyl-tRNA(Gln) amidotransferase subunit A, chloroplastic/mitochondrial; Short=Glu-AdT subunit A	0	17.054	9	3	7	3	1	645	71.6	7.96	101	3	0	2.048	1.522	0.743	1.03	0.61	-0.43	0.250569	0.70819	0.902616	0.488034	0.969369	1	134.2	274.8	204.3	31.34	38.94	33.2	176.2	180	102.2	102	401.8	371.1	203.5	182.2	269.9	280.8	150.5	154.6	176.2	159.7
High	CDP20626	pep supercontig:AUK_PRJEB4211_v1:scaffold_1455:13438:18419:1 gene:GSCOC_T00006212001 transcript:CDP20626	MEGDVEMAAAEDGAFVELDDMKKRLKEMEDEAAALREMQAKVEKEMGAVQDPAAAAASQANREEVDSRSVFVGNVDYSCTPEEVQQHFQACGTVNRVTIRTNKFGQPKGYAYVEFLEPEAVQEALLLNESELHGRQLKVSAKRTNVPGMKQFRPRRPSPYMGFRGRTPYVAPYVYPPYGFGKVPRFRMPMRYSPYF	---NA---	0	15.052	14	1	4	1	1	196	22.2	6.6	146	1	0	2.047	1.594	0.779	1.03	0.67	-0.36	0.899916	0.970227	0.998783	1	1	1	39.4	80.6	62.8	94.56	77.9	92.62	9.7	14.1	123.6	110.1	30.7	38.6	168.2	185.1	21.1	20.2	186.8	189.1	9.7	12.5
High	CDO98800	pep chromosome:AUK_PRJEB4211_v1:3:885451:890872:1 gene:GSCOC_T00025724001 transcript:CDO98800	MSLRPTERTEVRRNRYKVAVDAEEGRRRREDQMVEIRKSKREENLLKKRREGLQMSQPFPAPVPSNNIEKKLESLPLMVNGVYSNDNNLQLEATTQFRKLLSIERSPPIEEVIQSGVVPRFVEFLMREDFHQLQFEAAWALTNIASGTSENTKVVIDHGAVPIFVKLLGSPSDDVREQAVWALGNVAGDSPRCRDLVLGHGALIPLLAQLNEHAKLSMLRNATWTLSNFCRGKPQPPFEQVRPALPALQRLVHSNDEEVLTDACWALSYLSDGTNDKIQAVIEAGVCPRLVELLVHPSPSVLIPALRTVGNIVTGDDYQTQCIIDHGALPCLLSLLTHNHKKSIKKEACWTISNITAGNKEQIQAVIEAQLIGPLVNLLQTAEFDIKKEAAWAISNATS…	Importin subunit alpha-1a	0	40.797	26	8	26	1	1	530	58.8	5.5	253	8	0	2.04	2.061	1.01	1.03	1.04	0.01	0.437581	0.425006	1	0.753879	0.664	1	98.9	201.8	203.8	48.59	42.33	44.38	60.9	68.5	142.7	168.2	140.8	134.9	304.5	289.1	136.6	135.7	308	304.2	60.9	60.8
High	CDP02257	pep chromosome:AUK_PRJEB4211_v1:7:2533229:2535968:-1 gene:GSCOC_T00039605001 transcript:CDP02257	MSYFRKDHSDDVEDFDEYDPTPYSGGYDMSLTYGRPLPPSEETCYRSSSSTSESFDYDRPQYSSYAEPSAYGDEALENEYKSYVRPKPRPGRPGPPPPSYGAPSGDVGGYGHDNPQPNYAFQPGVNRPGAGGYGGESEYGGGGFGSEGYGRTKPPSSEYGSGYQRPGSEYERPTSEYGSGYGRKPEYERPSSEYGSGGYQRPSSEYGSGGYQRPTSEYGSGGYERPTSGLGSGGYEKPTSEYGSGYGRKSGYEEPTSEYGSGYARKTSYGEEESGGYGGFGRKPERPSYESQESEGRYGGSSYERPSYGRSEEEEYRKPSYGRSEEGEYRKPSYGSRDDDDEGYGRKKYGGEGSDDDEEKKHRYKHHHHHHHRKDYDDE	Uncharacterized protein At5g39570	0	26.986	30	6	9	6	1	379	42.1	5.06	258	6	0	2.039	1.591	0.78	1.03	0.67	-0.36	0.813245	0.953838	0.994907	1	1	1	182.1	371.3	289.7	67.69	50.27	59.81	93.8	94	366.6	352.6	237.8	224	593.4	579.7	169.2	155.6	495.9	524.1	93.8	83.4
High	CDP05740	pep chromosome:AUK_PRJEB4211_v1:5:27275001:27283841:-1 gene:GSCOC_T00021012001 transcript:CDP05740	MYVPTCSPSSSVSKSASAAILRAARVRFASTISSSSPSSILSSVSRSFVSPSVSKPSSFITCRSFKPSSAVRSLRCSVPRWSHGVDWRSPVSLRAQIRTAAPVIERFERKIATMAPEHPYKGILTSLPKPGGGDFGKFYSLPALNDPRIDKLPYSIRILLESAIRNCDNFQVTKNDVEKIIDWQNTSPKLVEIPFKPARVLLQDFTGVPAVVDLASMRDAIKSLGSDPEKINPLVPVDLVIDHSVQVDVARHENAVQANMDLEFKRNNERFAFLKWGSTAFHNMLVVPPGSGIVHQVNLEYLGRVVFNTDGILYPDSVVGTDSHTTMIDGLGVAGWGVGGIEAEAAMLGQPMSMVLPGVVGFKLSGKLRNGVTATDLVLTVTQMLRKHGVVGKFVEFYG…	Putative aconitate hydratase, cytoplasmic; Short=Aconitase; AltName: Full=Citrate hydro-lyase	0	151.003	40	25	59	21	1	1009	110.2	8.02	1231	25	3	2.038	2.432	1.193	1.03	1.28	0.25	0.000576904	4.87107e-05	0.634818	0.00351413	0.000289592	1	2919.4	5950	7100.1	15.83	18.64	15.72	2594.8	2503.2	3414.9	3284.7	5166.8	4893.8	7047.5	6851.9	6131.3	6243.4	8074.4	8192.5	2594.8	2220.4
High	CDP01209	pep chromosome:AUK_PRJEB4211_v1:10:4493564:4498313:1 gene:GSCOC_T00034780001 transcript:CDP01209 description:Adenine phosphoribosyl transferase 1 [Source:Projected from Arabidopsis thaliana (AT1G27450) UniProtKB/TrEMBL;Acc:F4HSX1]	MASSTTDAADDRIPRIASTIRVIQDFPKPGIQFQDITTLLLDPRAFKDAIDLFVERYKDQNINVVAGIEARGFIFGPPIALAMGAKFVPMRKPKKLPGEVISEEYSLEYGTDKMEMHVGAVQSGERALVVDDLIATGGTLSAAIRLLERVGVHVVECACVIELPELKGRDRLGDKPLFVLIS	Adenine phosphoribosyltransferase 1, chloroplastic; Short=APRT 1; Short=AtAPT1; Flags: Precursor	0	22.8	36	3	10	3	1	182	19.9	5.44	169	3	0	2.034	2.966	1.458	1.02	1.57	0.54	0.418324	0.095101	0.871582	0.730004	0.185776	1	233.4	474.8	692.4	32.46	52.72	44.12	305.1	325	178.6	176.1	801.9	737	305.9	272.1	1008.9	1027.4	436.4	475.2	305.1	288.3
High	CDP03848	pep chromosome:AUK_PRJEB4211_v1:1:34607179:34612644:-1 gene:GSCOC_T00016344001 transcript:CDP03848 description:PKT2 [Source:Projected from Arabidopsis thaliana (AT5G48880) UniProtKB/TrEMBL;Acc:A0A178UEC0]	MEKAIFRQKVLLEHLQPTSCFSHQLTHEESSSISPSICLAGDSAAYQRTAAFGDDVVIVAAYRTAICKSKRGGFKDTLADDLLAPVLKALIDKTNINPSEVGDIVVGTVVAPGSQRATECRMAAFYAGFPETVPIRTVNRQCSSGLQAVADVAACIKAGFYDIGIGAGLESMTTNSNVSIQQANPRVDSFPQARDCLLPMGITSENVAERYGVTRQEQDQAAVMSHKRAAAATASGKYKDEIIPVFTKIKDPKNGEEKPVTVSVDDGIRPSTNLTDLAKLKPAFKKDGTTTAGNASQISDGAGAVLLMKRSLAMEKGLPILGIFRSFSVAGVDPAVMGIGPAVAIPAAAKSAGLGVDDIDLFEINEAFASQYVYCCKKLELDMEKVNVNGGAMALGHPL…	3-ketoacyl CoA thiolase 1, peroxisomal; Short=PhKAT1; Flags: Precursor	0	28.959	24	6	11	5	1	466	49.2	7.5	189	6	0	2.033	5.351	2.632	1.02	2.42	1.4	0.00443827	5.31588e-07	0.000302809	0.0168167	7.42642e-06	0.00586074	443	900.5	2370.1	29.02	4.82	5.59	562.3	569.2	349	328.8	937.2	941.1	865.3	862.5	2479.4	2494	2249.2	2265.7	562.3	504.9
High	CDP06641	pep chromosome:AUK_PRJEB4211_v1:6:2294463:2296906:-1 gene:GSCOC_T00023560001 transcript:CDP06641	MILEGAEANWKCSTLCQRSLLVYVIANAASGMAVHDDCKLRFLELKAKRTYRFIVYKIEEKQKQVVVEKVGEPTKSYEDFTASLPVDECRYAVYDFDFVTAENCQKSRIFFIAWSPDTSRVRSKMIYASSKDRFKRELDGIQVELQATDPTEMGLDVIKSRAS	Actin-depolymerizing factor 1; Short=ADF-1	0	12.888	28	3	4	2	1	163	18.7	7.68	118	3	0	2.033	2.239	1.101	1.02	1.16	0.14	0.35052	0.278034	0.999809	0.642433	0.466131	1	55.2	112.3	123.7	38.67	27.48	31.83	71.6	84.2	42.6	36.9	156.3	133.1	87.7	94.8	157.9	165.6	96.9	87.6	71.6	74.7
High	CDP18573	pep chromosome:AUK_PRJEB4211_v1:1:279317:288970:-1 gene:GSCOC_T00012403001 transcript:CDP18573 description:Glucosidase 2 subunit beta [Source:Projected from Arabidopsis thaliana (AT5G56360) UniProtKB/Swiss-Prot;Acc:Q9FM96]	MNKKKKIGGLRRLFEISIVIIIGCICAITRSAAAAAAKDDQFLLLLGVSPQDEDYYKGLLSSPSSTIKCKDGSFKFSTSQLNDDFCDCPDASDEPGTSACPNGKFYCKNAGHIPFSLYSSRVNDGICDCCDGSDEYDGKVKCPNTCWEAGKVARERLKMKIATYQQGVTVRNRLVEQAKLAIAKEEAELSKLKNEEKILKGLVEQLQERKEQIEKAEEKERLQKEKEDKERKETEEANLKEKQNGEQVESSEADALKNDIHDKIGEQVESSEADALKNDMHDKIGLLGDSSSSQDVMEGHGDSESEAQHGEFDVKEESSIGDVKPLQEDSLLHATEKEEQLTVDGQPGLDTGNQAEVEEDNSESLSKEELGRLVASRWTGEKTEPQTQEVSSAKDKNHG…	Glucosidase 2 subunit beta; AltName: Full=Glucosidase II subunit beta; Flags: Precursor	0	18.034	13	4	6	4	1	659	74.2	4.82	66	4	0	2.032	3.799	1.87	1.02	1.93	0.9	0.832457	0.3715	0.916369	1	0.594051	1	88.6	180	336.5	91.93	73.12	65.76	276.8	254.9	30.8	30.1	423.7	349.9	92.6	86.7	624.9	641.5	166.5	181.2	276.8	226.1
High	CDO98640	pep chromosome:AUK_PRJEB4211_v1:4:7675293:7686693:-1 gene:GSCOC_T00022803001 transcript:CDO98640	MAFQGKKLINDPNDVVTEFIEGLVETYPGLQYLDGFPEVKVVLRADISGSTHDKVAVISGGGSGHEPAHAGFVGEGMLTAAICGDVFASPPVDSILAGIRAVTGPMGCLLIVKNYTGDRLNFGLAAEQAKSEGYKVEMVIVGDDCALPPPRGIAGRRGLAGTVLVHKVAGAAAASGLSLSAVAAEAKRASELIGTMGVALSVCTLPGQVTSDRLGHGKMELGLGIHGEPGAAVADLQPVDVIVSHVLKQILSLETNYVPITRGSRVVLMINGLGGTPVMELMIATGKAVPRLQLEHGLAVERVYTGSFMTSLDMAGFSITVMKANEEILNRLDAPTKAPCWPVGADGNRPPAKIPVPLPPSLSTKSDETLSRPEQLSSQGYLLEVAIEAGATAVINLSD…	---NA---	0	28.333	28	7	14	7	1	594	61.3	5.66	185	7	0	2.031	3.064	1.509	1.02	1.62	0.59	0.0024657	1.63599e-05	0.0782921	0.0106106	0.000131693	0.337632	248.6	505	761.8	4.43	5.43	25.24	256.6	262.5	240.7	240.9	520.3	507.6	458.2	502.4	941.4	944.8	593.8	616.5	256.6	232.8
High	CDP14134	pep chromosome:AUK_PRJEB4211_v1:6:17975935:17977371:-1 gene:GSCOC_T00040370001 transcript:CDP14134	MAKNDHSTVQNQIASIQETHEVTVVMVPLPLQGHLNQLLHLSRLISSYNIPVHYVGTATHTRQAKVRVQGWDPLAISNIHFHEFSTPSYEAPPPDPNAPTKFPTQLIPVLNASVKLREPVHALLQQLSSTTRRLVVICDSVTPYVIKDVGLIPNAESYTFISISAFAIYTFSWEQEGKPRVFEPEILEALESLPSHESSIPQEVTDFLKLQKESMPIISGDLYNTCRFIEGPYLDLLAKAKTADSHKQWAVGPFNPVEINGQKNTEQRHYCLEWLDKQGPNSVIFVCFGSNTSVSHEEAAQIAIGLEKSGQKFIWILKDGDQGDIFKGEVRRAQLPGGFEERTEGRGIIVRDWAPQLEILGHSSTGGFMSHCGWNSCMESISMGVPVAAWPMHSEQPRN…	Zeatin O-glucosyltransferase; AltName: Full=Trans-zeatin O-beta-D-glucosyltransferase	0	27.1	22	7	13	7	1	478	53.5	6.39	240	7	0	2.031	2.278	1.122	1.02	1.19	0.17	0.310023	0.194358	0.997815	0.582963	0.341155	1	518.5	1053.2	1181.4	51.29	47.79	41.19	329.4	308	816.3	838.3	674.8	688	1671.7	1612.3	812.3	815.3	1712	1720.6	329.4	273.2
High	CDP04073	pep chromosome:AUK_PRJEB4211_v1:1:33021906:33025588:-1 gene:GSCOC_T00016613001 transcript:CDP04073	MPPFDYTPPPYSGPSTEEILRKRQQYLSPAICHFYKKPLNLVDGKMQYLFDEKGRRYLDAFGGIATVCCGHCHPEVVDAIVNQTKRLQHSTVLYLNHAIADFAEALASKLPGDLKVVFFTNSGTEANELAMLLARLYTGYHDIISLRNSYHGNAAGTMGATAQSNYKFNVMQTGVHHALNPDQYRGIFGSDGPKYAKDVEDLITYGTCGCVAGFIAEAIQGVGGILELAPGYLPAVYSTIRKAGGLCIADEVQSGFARIGSHFWGFEGHGVVPDIVTMAKGIGNGIPIGAVVTTPEIANVLTRRNYFNTFGGNPMCTAGGLAVLRVIEKEKLQQNAFTVGSYLKERLTSLKGKHEIIGDVRGRGLMLGVELVQDRELKTPAKVETAHLMDEMKELGVLI…	Alanine--glyoxylate aminotransferase 2 homolog 3, mitochondrial; AltName: Full=Beta-alanine-pyruvate aminotransferase 3; Flags: Precursor	0	7.008	9	2	4	2	1	436	47.5	7.31	23	2	0	2.031	2.164	1.065	1.02	1.11	0.09	0.0757495	0.0445545	0.998322	0.185496	0.0964109	1	93.5	189.9	202.3	20.65	34.58	30.77	108.1	115.1	75.6	80.8	235.6	280.5	133	153.1	285.5	252.6	153.7	162.1	108.1	102.1
High	CDO97532	pep chromosome:AUK_PRJEB4211_v1:2:19764126:19768155:1 gene:GSCOC_T00014905001 transcript:CDO97532	MRHSVNKSREYCSRRVFPGALFRFKPNQDPRVRHRHDHHPLLPIAMASLSLFLSNPHRPLRPTPLRPLHFSSKVSASAKPPPPPPEKKSFAVATGELFLGIAARLIIRRGDNNLVGQGGEFINGGLEPGGASTSESWWRRWRKEKASSVVIEDPLQPDVTWEQREEDVEAERRRKEQRAVSSPGFSFSAAGLLFPYHLGVAQFLIENGYIKDTTPLAGSSAGAIVCAVIASGASMQEALEVTKILAQDCRLNGTAFRLGAVLRDVLQNFLPDDVHIRSSGRVRVAVTQILWRPRGLLVDQFDSKEDLINAVFTSSFVPGYLAPRPATRFRNRLCIDGGLTLFMPPTSAYQTVRVCAFPASRLGLAGIGISPDCNPENRASPRELFNWALEPAEDHILDK…	---NA---	0	8.505	8	3	3	3	1	434	47.9	8.79	40	3	0	2.031	1.56	0.768	1.02	0.64	-0.38	0.237321	0.620958	0.938571	0.466401	0.880591	1	82.4	167.3	128.5	14.78	40.67	6.53	80.7	83	81.8	107.9	219	247.9	100.7	127.8	131	125	143.7	126.1	80.7	73.6
High	CDP01928	pep chromosome:AUK_PRJEB4211_v1:7:7628831:7634562:-1 gene:GSCOC_T00037114001 transcript:CDP01928	MKQQQQKQKLFLIATFIFFLSSPTFTDGAGILSRIFDRTITASDNNHLSSGNSSSKYLTRDALWFNQTLDHFSPYDHRQFRQRYYEFLDHFRAPDGPIFLKICGESECGGISNDYLAVLAKKFEAAVVSPEHRYYGKSSPFKSLTTENLRFLSSKQALFDLAVFRDYYQKSLNARFNRTAADNPWFVFGASYSGALSAWFRLKFPHLTCGSLASSAVVLAVYNFTEFDQQIGESAGPECKSVLQEITHIVEERLASNANELKSLFGALELKIDGDFMYFLADAAAIAFQYGNPDKLCTPLIEAKKAGEDLVNAYAIYVKEYYVKSFGANVETYNQQHLKNTAVNDDSADRLWWFQVCTEVAYFQVAPSNDKVSFVISGRYHLDLCKNVFGEGIYPDVDA…	---NA---	0	49.995	19	6	16	6	1	501	56.2	6.52	417	6	0	2.031	1.39	0.684	1.02	0.48	-0.55	0.433651	0.916268	0.884516	0.749762	1	1	718.3	1458.9	998.6	36.45	59.35	63.8	533.6	489.5	995.9	967	825.1	829.7	2588.6	2565.4	546.5	526.5	1824.8	1893.8	533.6	434.2
High	P42652	14-3-3 protein 4 OS=Solanum lycopersicum OX=4081 GN=TFT4 PE=2 SV=1	MADSSREENVYLAKLAEQAERYEEMIEFMEKVAKTADVEELTVEERNLLSVAYKNVIGARRASWRIISSIEQKEESRGNEDHVNTIKEYRSKIEADLSKICDGILSLLESNLIPSASTAESKVFHLKMKGDYHRYLAEFKTGTERKEAAENTLLAYKSAQDIALAELAPTHPIRLGLALNFSVFYYEILNSPDRACNLAKQAFDEAISELDTLGEESYKDSTLIMQLLRDNLTLWTSDNADDVGDDIKEASKPESGEGQQ	14-3-3-like protein	0	49.911	26	9	28	1	1	260	29.3	4.77	254	9	4	2.027	1.726	0.852	1.02	0.79	-0.23	0.0133347	0.0635011	0.919862	0.0428101	0.131137	1	629.9	1276.7	1087.3	7.85	5	6.77	676.1	657.9	569.4	603.1	1240.6	1196.5	1313.7	1332.6	1146.1	1161.7	1031.5	1022.1	676.1	583.6
High	CDP19392	pep supercontig:AUK_PRJEB4211_v1:scaffold_462:20906:25647:-1 gene:GSCOC_T00008790001 transcript:CDP19392	MTEAVVRGKPGMASVKDMPLVQDGPPPGGFAPVRYARRIPNSGPSAMAIFLAAFGVFSYGMYQVGKGNKIRRALKEEKYAARSAILPLLQAEEDERFVEEWKKYLEEEARIMKDVPGWKVGENVYNSGRWMPPATGELRPDVW	NADH dehydrogenase [ubiquinone] 1 alpha subcomplex subunit 13-B	0	8.511	15	1	3	1	1	143	16	9.17	60	1	0	2.026	2.431	1.2	1.02	1.28	0.26	0.659506	0.453879	0.996229	1	0.701883	1	108.5	219.8	263.7	62.46	67.83	68.55	196.4	204.2	59.6	59.9	426.6	443	113.3	113	543.8	510.7	136.2	133.5	196.4	181.1
High	CDO97662	pep chromosome:AUK_PRJEB4211_v1:2:20799104:20809767:1 gene:GSCOC_T00015068001 transcript:CDO97662 description:Methionine S-methyltransferase [Source:Projected from Arabidopsis thaliana (AT5G49810) UniProtKB/Swiss-Prot;Acc:Q9LTB2]	MASKKSMDEFLNQCVQSGDAAYRAFRSLLERLEDPQTRKHARIFLSDLHKRFDSKEAAEKCLQSYHFRIEDIYLEQSEGFQVRKKLTMMVIPSIFIPEDWSFTFYEGLNRHPDSIFKDRTVAELGCGNGWISIAIAEKWSPLKVYGLDINPRAVKVAWINLYLNALDDNGEPIYDEENKTLLDRVEFYESDLLSYCKDHKIELERIVGCIPQILNPNPDAMSKMITEYASEEFLYSLSNYCALQGFVEDQFGLGLIARAVEEGIDVIKPMGIMIFNMGGRPGHAVCKRLFERRGLCVTKLWQTKILQAADTDISALVEIEKNSPHRFEFFMGLGGDQPICARTAWAYGKAGGRISHALSVYSCQLRQPSQVKKIFEFLKNGFHDISNSLDLSFEDDSVA…	Methionine S-methyltransferase; AltName: Full=AdoMet:Met S-methyltransferase	0	44.062	10	8	14	8	1	1082	120.2	6	340	8	0	2.024	3.379	1.669	1.02	1.76	0.74	0.000473265	8.74739e-07	0.00950398	0.00303676	1.15034e-05	0.0736957	455.4	921.9	1538.7	3.97	6.52	18.12	449.5	446.7	461.3	486.8	1021.2	944.7	885.3	899.7	1870.7	1764.4	1341.8	1317.4	449.5	396.2
High	CDP19816	pep supercontig:AUK_PRJEB4211_v1:scaffold_707:31087:46314:1 gene:GSCOC_T00005792001 transcript:CDP19816	MMKAKFEATSRSIALIEVHGAWLPPWLAVHLTRYQTLLEKHWEEHGKPAADALLQKAIKGKAKAEIWAGPHIETIHTKWIPVIKEQWLILVTKAEPHVQSLSTKALEIYESSKIAAMPHVIKVQELADPYFQEIKKYSKPYIDQVATAARPHVDNVRVVLKPYTEQAFHVYGKFLESASTYHHQVQGTVQEKLQMHDLTRPLATKELVWFIASALLALPIIAGFKICSAICWKKTKHSNRHGHSNHLRRRAKRSHPDK	---NA---	0	3.939	3	1	3	1	1	258	29.5	9.67	94	1	0	2.023	3.52	1.739	1.02	1.82	0.8	0.000411399	5.17908e-07	0.00306308	0.0027279	7.2936e-06	0.0319857	199.4	403.4	701.7	16.48	10.88	13.58	226.2	228	175.7	165.8	435.2	437.3	351.5	373.9	764.1	806.4	604.8	644.4	226.2	202.2
High	CDO99002	pep chromosome:AUK_PRJEB4211_v1:3:2427500:2430711:1 gene:GSCOC_T00026002001 transcript:CDO99002	MLGVFSSSIMSPPDELVAAGSRTPSPKITAAALVNRFLQTNSSAVSMQIGDDAQLAYTHHNESPLHPRSFAVKDDIFCLFEGALDNLGSLKQQYGLSKSANEVVLMIEAYKALRDRAPYPPNHVVGHLEGNFAFIVFDKATSTLFVATDEKAKVPLYWGITADGWVAFADDADLLKGACGKSLASFPQGCFFSTALGELRSYENPKNKITAIPAKEEEIWGAKFMVEGPAVFAATK	Stem-specific protein TSJT1	0	16.113	22	4	7	4	1	236	25.5	5.85	88	4	0	2.023	0.733	0.362	1.02	-0.45	-1.47	0.120308	0.766726	0.0135409	0.271585	1	0.0963126	438.4	886.9	321.2	24.61	21.73	28.64	546.7	541.4	355.1	350.8	1096.1	1048.2	750.4	718.7	411.4	410.1	243.6	251.5	546.7	480.2
High	CDP08444	pep chromosome:AUK_PRJEB4211_v1:1:20376049:20378708:1 gene:GSCOC_T00027330001 transcript:CDP08444	MAGFNRFLVGLVIVFLASSPSSSALHFLLIHGSGHGAWCWYKLATLLEQKGHNVTALDLAYSGRNQVPLERVHTFDEYHKPLSEYMKSLSPEDKVVLVGHSYGGYGVSWVMERFPEKVLGGVFASAFMVGPNFTLEDTNKLLPRPDQLDDSFVIGDPIRIVLIGPHFAATLLYQNSPPEDLKLANYSLRLAQFFYGDVANRQIRVTKERYGSVPRAYVIDLEDKLITPEAQRLMIARTPPQVVRRIRGADHMVQFSKPREFADNLIEIGGLFESFGQEGKP	Polyneuridine-aldehyde esterase; AltName: Full=Polyneuridine aldehyde esterase; Flags: Precursor	0	5.333	6	1	4	1	1	281	31.5	7.3	34	1	0	2.019	2.316	1.147	1.01	1.21	0.2	0.0105648	0.0027558	0.9474	0.0349669	0.00846479	1	276.3	557.8	639.9	23.79	22.17	22.25	226.6	232.1	361.9	328.8	460.6	469	663.4	703.4	541	514.1	796.3	756.8	226.6	205.9
High	CDP17645	pep chromosome:AUK_PRJEB4211_v1:6:31135824:31152215:-1 gene:GSCOC_T00001553001 transcript:CDP17645 description:NADH-cytochrome b5 reductase [Source:Projected from Arabidopsis thaliana (AT5G17770) UniProtKB/TrEMBL;Acc:A0A178US77]	MVFLESTEAQILGVAIAAVAVGAAAFYLYSSKKAKVCLDPEKWKEFKLVKRSQLSHNVAKFRFTLPTPTSVLGLPIGQHISCRGKDGQGEEVIKPYTPTTLDSDVGYFELVIKMYPQGRMSHHFRELHVGDYLAVKGPKGRFRYQPGQVRAFGMLAGGSGITPMFQVARAILENPNDKTNVHLIYANVTYEDILLKEELESLTANYAGRFKVYYVLNQPPEVWNGGVGFVSKEMIQEHCPAPASDIKVLRCGPPPMNKAMAAHLEALGYTPEMQFQF	NADH--cytochrome b5 reductase 1	0	68.888	37	6	20	6	1	277	30.8	8.56	281	6	0	2.019	1.735	0.859	1.01	0.79	-0.22	0.0367658	0.114611	0.969003	0.0995047	0.217553	1	519.1	1047.8	900.4	13.34	9.01	6.62	539.7	596.7	432.8	499.2	977.8	946.3	1123.7	1122.7	865.9	854.3	936.3	981.8	539.7	529.3
High	CDP17899	pep chromosome:AUK_PRJEB4211_v1:8:21390807:21393526:-1 gene:GSCOC_T00011895001 transcript:CDP17899 description:Chorismate mutase 2 [Source:Projected from Arabidopsis thaliana (AT5G10870) UniProtKB/Swiss-Prot;Acc:Q9S7H4]	MAHSDGLTLESIRNSLIRQEDTIIFSLIERAKYPIIPQLYDSRCSVLPGISGSLLENIVRETEAIQAKYGRYQFPEEHAFFPDNLPDSLVPPNSHPQVLHPAAASININKTIWDMYINKLLPLIASKGDYENHTCVAASDLECLQALSRRIHYGKFVAEVKFKDASEEYSPAIQAKDRDALMKLLTFESVEEMVKKRVEKKAKVFGQEVNLTNDAGNGKCKIDPSVLPCLYGEWVMPLTKHVEVEYLLRRLD	Chorismate mutase 2; Short=PhCM2	0	11.653	15	3	5	3	1	252	28.5	6.24	66	3	0	2.018	1.811	0.897	1.01	0.86	-0.16	0.176184	0.313271	0.994959	0.36802	0.514195	1	340.3	686.8	616.2	47.37	16.49	11.58	571.3	507.3	228.3	227.4	782.4	810.7	602.9	594	672.9	695.7	557	564.3	571.3	450
High	CDO98671	pep chromosome:AUK_PRJEB4211_v1:4:8057065:8062292:1 gene:GSCOC_T00022843001 transcript:CDO98671 description:Ubiquitin-conjugating enzyme 27 [Source:Projected from Arabidopsis thaliana (AT5G50870) UniProtKB/TrEMBL;Acc:F4KAG5]	MVDLTRVQKELQECNKDVEVSGIRVAPKADSLIHLIGTIPGPLGTPYEGGTFNIDITLPDGYPFEPPKMRFATKVWHPNISSQSGAICLDILKDQWSPALTIKTALLSLQALLSAPAPDDPQDAVVAQQYIKDQNTFISTARYWTEAFAKATGVEEKVKRLIEMGFPEDLVRSILEAVGGDENLALEKLCSA	Ubiquitin-conjugating enzyme E2 27; AltName: Full=E2 ubiquitin-conjugating enzyme 27; AltName: Full=Ubiquitin carrier protein 27	0	15.11	8	1	4	1	1	192	21	4.92	128	1	0	2.012	2.637	1.311	1.01	1.4	0.39	0.414394	0.137276	0.945081	0.724705	0.253645	1	122.1	245.7	322.1	44.76	53.56	54	175	184.1	85.3	74	404.7	401.4	144.9	150.4	559.6	524.9	196.8	197.7	175	163.3
High	CDP08933	pep chromosome:AUK_PRJEB4211_v1:1:30308187:30314209:1 gene:GSCOC_T00028070001 transcript:CDP08933 description:ROP interactive partner 5 [Source:Projected from Arabidopsis thaliana (AT5G60210) TAIR;Acc:AT5G60210]	MQTPKARNSTGETPQKISPRVVSSEVASKPSPRSVSSDVPLKLSPRVVRQLKTASQDSDSATSSCRASRTPKDRSCKVAERKSPRSPVPEKKHPSRVAELEFQISQLQNDLKRAKDQLVSSEAWKKQAEQDAEESKKQLLEMSLKLEKSREQVLKKSGSEEALLIQPQKITEDQDSLLQSQLEAIKKQHSLDSAALASAVNEIKELKIQLESVAESEAARTKHAELSQIELNSLKQNLTETLAVMEDMKNELKDCKESEAQARVLVGETLMQLETAKRTVECLRSDGVKAVEAFDSIASELEQSRARVNLLEGIVSELKADTKIVDGYGSQTAGDQEITFGTEEKANLGNSNEAELNSLKSEVEQLKSALEASEIRYSEEQSRNAAEIKSAYKLVEQIK…	---NA---	0	23.668	12	5	8	5	1	617	69.1	5.26	150	5	0	2.01	2.951	1.468	1.01	1.56	0.55	0.676105	0.312646	0.960804	1	0.513595	1	245.4	493.3	724.3	75.64	52.44	51.12	98.3	118	510.3	525.4	311.4	295.6	781.3	830.9	459.5	430	1159.5	1141.7	98.3	104.7
High	CDP11164	pep chromosome:AUK_PRJEB4211_v1:3:8160910:8183993:-1 gene:GSCOC_T00033231001 transcript:CDP11164 description:Beta-galactosidase 9 [Source:Projected from Arabidopsis thaliana (AT2G32810) UniProtKB/Swiss-Prot;Acc:Q9SCV3]	MVVGRRMLLQWLMITAALTLQLALLAGGEYFKPFNVSYDHRAVIIDGKRRMLISAGIHYPRATAEMWPDLIAKSKEGGADVIETYAFWNVHEPIKGQYNFEGRYDIVKFAKLVGSSELYLLLRIGPYVCAEWNFGGFPVWLRDIPGIEFRTDNAPFKEEMQRFVKKIVDLMRAESLFSWQGGPIIMLQIENEYGNVESSFGARGKAYMKWAAEMAVGLGADVPWVMCKQVDAPEYIIDACNGYYCDGFRPNSQNKPMVWTENWDGWYTSWGGRLPHRPVEDIAFAVARFFQRGGSLMNYYMFFGGTNFGRTSGGPNQITSYDYDAPIDEYGLLSQPKWGHLRDLHAAIKLCEPALAAADSAHYIKLGPKQEAHVYRGNITSHGQNISLYESCSAFLANI…	Beta-galactosidase 9; Short=Lactase 9; Flags: Precursor	0	7.165	4	2	4	2	1	890	99.4	6.54	37	2	0	2.01	1.132	0.563	1.01	0.18	-0.83	0.94507	0.999936	0.971541	1	1	1	158.4	318.5	179.3	104.2	86.77	84.29	36.6	35.1	707.6	685.8	121.3	121.4	871.1	835.8	68.5	72.6	460.3	442.5	36.6	31.1
High	CDP08007	pep chromosome:AUK_PRJEB4211_v1:3:28898632:28903257:-1 gene:GSCOC_T00026666001 transcript:CDP08007 description:Syntaxin-61 [Source:Projected from Arabidopsis thaliana (AT1G28490) UniProtKB/Swiss-Prot;Acc:Q946Y7]	MSSSAQDPFYIVKEEIQDSIDKLLSSFHKWERLAPDSGEQLNLTKELLAGCESIQWQVDELDKTISVAARDPSWYGINEPELEKRRRWTGNARSQVGNMKKAIVAGKESNGISSSNVNGMRRELMRMPNSQQTDRSNQYVTQANDDLISSESDRQLLLIKQQDEELDELSASVERIGGVGLTIHEELLAHEKIIDDLGTEMEGTSNRLDFVQKKVGMVMKKAGAKGQFMMILFLLVLFIILFVLVFLT	---NA---	0	11.516	11	2	2	2	1	248	28	5.12	79	2	0	2.009	1.871	0.931	1.01	0.9	-0.1	0.636527	0.650423	1	0.988348	0.912146	1	35.3	70.9	66.1	51.3	72.34	69.99	55.6	53.9	23.1	19.2	146.5	136.1	37	28.4	126.5	142.3	32.2	34.5	55.6	47.8
High	P35007	Adenosylhomocysteinase OS=Catharanthus roseus OX=4058 GN=SAHH PE=2 SV=1	MALLVEKTSSGREYKVKDMSQADFGRLEIELAEVEMPGLMSCRAEFGPSQPFKGAKITGSLHMTIQTAVLIETLTALGAEVRWCSCNIFSTQEHAAAAIARDSAAVFAWKGETLQEYWWCTERALDWGPDGGPDLIVDDGGDATLLIHEGVKAEEEYKKNGALPDPSSTDNAEFQIVLTIIRDGLKSDPTKYTRMKERLVGVSEETTTGVKRLYQMQANGTLLFPAINVNDSVTKSKFDNLYGCRHSLPDGLMRATDVMIAGKVAVVAGYGDVGKGCAAALKQAGARVIVTEIDPICALQATMEGLQVLTLEDVVSEADIFVTTTGNKDIIMVDHMRKMKNNAIVCNIGHFDNEIDMLGLETYPGVKRITIKPQTDRWVFPDTNSGIIVLAEGRLMNLG…	Adenosylhomocysteinase; Short=AdoHcyase; AltName: Full=S-adenosyl-L-homocysteine hydrolase	0	146.889	35	19	65	2	1	485	53.2	5.88	1066	19	0	2.008	2.292	1.141	1.01	1.2	0.19	5.05137e-09	7.28206e-10	0.0762917	5.01735e-07	4.32669e-08	0.329591	682.8	1371.3	1564.8	7.93	1.38	3.82	624	644.2	728.8	723.8	1352.3	1357	1388.6	1385.8	1538.9	1483.3	1618.1	1591.2	624	571.4
High	CDO97526	pep chromosome:AUK_PRJEB4211_v1:2:19726490:19730336:-1 gene:GSCOC_T00014899001 transcript:CDO97526	MRWPSNTCTSVLRFLVIVLISAVRSAEASIHDYHGDPFREVGNAYLLSGGSEGILASQSSPPSTRRGFHSAVHDGLSYIRFENITFWRGRSAADQHPEMAYSSGLVQVVIFEAADRDNIGGSPYGGQRSICCTPDLAKLEGCKQGEVIRIPSATDINWPVVLNVHFRGNLMSARMKNKEAYIRKTGMYNLFFISCDPKLKGLKVTGRTLWKNPDGYLPGRMSPLMKFYVFMSVAYAVLSAIWFFQYVRYWKDVLQLQHCIAVVIALGLLEMIFWYFDYAFFNGTGTRPAGITTLVVTIGAIRKTLLRLLILSVAMGFGVVRPTLGGLTTKVLLLGITYFLASELLNIAEYVGTINDIAGRARVFLVLPDALLDAFLILWIFTSLSKTLEQLQAKRSSVK…	Protein CANDIDATE G-PROTEIN COUPLED RECEPTOR 7; Short=AtCand7; Flags: Precursor	0	7.53	4	1	2	1	1	514	57.4	7.59	81	1	0	2.008	2.072	1.032	1.01	1.05	0.05	0.24091	0.221105	0.999998	0.472787	0.381386	1	83.2	167.1	172.4	37.09	30.28	36.54	61.6	57.7	112.4	119.1	127.5	130.9	227.2	213.3	129	119.2	245.4	230.6	61.6	51.2
High	CDP11417	pep chromosome:AUK_PRJEB4211_v1:10:26025967:26034297:1 gene:GSCOC_T00033663001 transcript:CDP11417	MDTKGRLIAGSHNRNEFVLINADEIGRVTSVKELSGQICQICGDEIEFTVDGEPFVACNECAFPVCRPCYEYERREGNQACPQCKTRYKRIKGSPRVEGDEDEDEFDDLEHEFDYNSNERRDPQQIAEAALAARLNIGRGGNVNASGITTPSEMDSALDSEVPLLTYGQEDDGISADKHALIIPPFMGRGKRVHPVPFTDNSMSLPPRPMDPKKDLAVYGYGTVAWKDRMEEWKKKQNEKLQVVKHQGDKGGGNNDGDELDDPDLPKMDEGRQPLSRKLPIPSSKINPYRMIILIRMAILGLFFHYRILHPVNDAYGLWLTSIICEIWFAVSWIFDQFPKWFPIERETYLDRLSLRYEKEGKPSELAPVDIFVSTVDPMKEPPLITANTVLSILAVDYP…	Cellulose synthase A catalytic subunit 6 [UDP-forming]; Short=AtCesA6; AltName: Full=AraxCelA; AltName: Full=Isoxaben-resistant protein 2; AltName: Full=Protein PROCUSTE 1; AltName: Full=Protein QUILL	0	10.887	6	3	3	3	1	1096	123.6	6.93	66	3	0	2.005	0.886	0.442	1	-0.17	-1.18	0.351607	0.94954	0.162132	0.643832	1	0.574916	22.3	44.7	19.8	36.66	34.32	71.27	17.1	18.4	27	36.7	38	27.3	62.3	52.5	8.7	11	44.1	35.5	17.1	16.3
High	CDP03757	pep chromosome:AUK_PRJEB4211_v1:1:35298865:35301976:-1 gene:GSCOC_T00016235001 transcript:CDP03757 description:NAP4 [Source:Projected from Arabidopsis thaliana (AT1G03900) UniProtKB/TrEMBL;Acc:A0A178WMR3]	MSFEDDEESFEHTLLVVREVSVYKIPPRSTSGGYKCGEWLQSDKIWSGRLRVVSCNTRCEIRLEDPNSGELFAACFINPGQRENSVEPALDSSRYFVLKIEDGTGKHAFIGLGFNERNEAFDFNVALSDHEKYVRREHEKETGGAAGEGSDDSHIDIHPAVNHRLKEGETIRINVKNKPSSGTGMLSAAGMSSGHPGTVKAKTLSLAPPPSGGVRIRSPLPPPPNDSAAARTTSGSHNTTLKVPKEVARHSADPLADLSQLEKNLPTATGTGSNKATAAGWAAF	Uncharacterized protein At1g03900	0	22.179	21	4	9	4	1	284	30.6	6.68	137	4	0	2.001	3.358	1.678	1	1.75	0.75	0.0054897	1.70544e-05	0.0381288	0.0202565	0.000134782	0.200032	398.5	797.4	1338	7.32	11.64	18.07	351.4	400.7	396.2	418.9	695.8	733.9	878.3	866.4	1174.5	1137.5	1628.6	1524.2	351.4	355.4
High	CDP08299	pep chromosome:AUK_PRJEB4211_v1:8:25808122:25810592:-1 gene:GSCOC_T00027089001 transcript:CDP08299	MASKTEDPTSLTVAAQKKEVEGEESATAGAPGTEDEDTGAQVAPIIKLQEVAVTTGEENEDVLLDLKAKLYRFDREGNQWKERGVGTVKLLKHKETGKVRLVMRQSKTLKICANHLVLPSISLQEHHGNDKSCVWHAADFADGELKEETFAIRFASVGDCKAFKEKITEVAESVDNKAGESEEATTTADLLNKLSVSSKDQGEKHEGKVASAALEKKDADEKLENPADDYVLV	---NA---	0	6.83	14	2	2	2	1	233	25.4	5.06	31	2	0	2.001	1.353	0.676	1	0.44	-0.56	0.0711572	0.836345	0.367454	0.176201	1	0.966219	93.3	186.7	126.2	18.98	40.81	11.36	106.5	116.8	80	81.7	131.1	126.3	265.9	272.6	100.8	124.9	127.6	131.2	106.5	103.6
High	CDO97753	pep chromosome:AUK_PRJEB4211_v1:4:250505:254684:-1 gene:GSCOC_T00021638001 transcript:CDO97753	MAVDPRQVVAGVLTVTMFVMLGNMIKRDHFDSLQVNDSEIPSLHDSTKASEQSLVTLPDGGADAPWKKDGSTLKPCWTKPVLEEVEQSQGFVTFSFTNGPEYHVSQITDAVKVARYLRATLVLPDIRGSKPGDKWNFEEIYDVEKLVKSLDGVLKIATHQPSEISTRNLAVVKVPNLVTEEFIAENIEPVFRTKGNIRLATYFPSVNMRKTEETSKIDSVACMAMFGSLNLQPAVREVVDSMIERLRTLSRKTSGRFIAVDLRVDILEKKGCQGSGTSRSKSCYGPREVALFLRKIGFDKDTTLYLTQSRWDSSLDALKDFFPKTYTKEGIMPADKKERFLDSEASELEKVIDFYISTESDVFVPAISGLFYANVAGQRIASGRTRILVPAKIPGSSAS…	O-fucosyltransferase 29; Short=O-FucT-29; AltName: Full=O-fucosyltransferase family protein	0	18.693	9	3	10	3	1	420	46.8	7.71	181	3	0	1.994	3.047	1.528	1	1.61	0.61	0.0175169	0.000226755	0.198746	0.0535353	0.00105098	0.655915	188.2	375.3	573.5	27.1	6.02	6.11	231.3	247.7	153.1	145.2	381.7	400.9	368.9	347.2	548.9	545	614.8	599.2	231.3	219.7
High	CDP07526	pep chromosome:AUK_PRJEB4211_v1:10:2230800:2235721:1 gene:GSCOC_T00024811001 transcript:CDP07526 description:Glucose-6-phosphate isomerase [Source:Projected from Arabidopsis thaliana (AT5G42740) UniProtKB/TrEMBL;Acc:A0A178UPP5]	MGSSSLICDSESWKDLKFHVEDIKKTHLRELMADTERCKSMMVEFDGNLLDYSRQRATHDTLNKLLSLAEAAHVKDKINRMFNGERINSTENRSVLHVALRAPRDAVIKSDGKNVVPDVWGVLDKIREFSERVRSGAWVGATGKPLKDVVAIGIGGSFLGPLFVHTALQTDSEAIESAKGRQLRFLANVDPIDVARNIAGLSPETTLVVVVSKTFTTAETMLNARTLREWISSALGPQAVAKHMVAVSTNLTLVEKFGIDPNNAFAFWDWVGGRYSVCSAVGVLPLSLQYGFSIVEKFLKGAWSVDQHFYSAPFEKNIPVLLGLLSVWNVSFLGYPARAILPYSQALEKLAPHIQQACC	Glucose-6-phosphate isomerase, cytosolic; Short=GPI; AltName: Full=Phosphoglucose isomerase; Short=PGI; AltName: Full=Phosphohexose isomerase; Short=PHI	0	26.86	30	7	10	3	1	359	39.6	8.07	209	7	2	1.991	2.255	1.133	0.99	1.17	0.18	0.00608938	0.00143666	0.940375	0.0221057	0.00481801	1	460.9	917.5	1039.6	27.16	3.35	3.43	580	591.8	359.5	366.3	880.1	917.1	955.5	917.9	1018	999.3	1061.7	1074.7	580	524.9
High	CDP03347	pep chromosome:AUK_PRJEB4211_v1:6:7746522:7753840:-1 gene:GSCOC_T00041898001 transcript:CDP03347	MAAETNEKLEGSSVIPKIRFTKPFINGYFVDSVSGRTYETIDPRTGKPTARIAEGDKEDVDLAVKAAREAFDNGPWPRFPGPGRRKLILKFADLIDENVEEIAALDALDAGKLFHCLKAVDIPLVAETLRSHAGAADKIHGETLKMTREFQGCTLREPIGVVGIIIPWNYPCNILFLKVAPALAAGCTIVIKPAEQTPLSSLYCAHLAKKVRSNFGQLYSPQELAFQMEYSMLYQDMDTPLVLPYVSSHMDIDKVAFTGSTGVGRLVMEAAAKSNLKSVSLELGGKNPFIVFEDADVDTAASLVLQGSLCNKGEVCVASSRTFVQEGIYEEFFKKLVEKTKTWVVGDPFDPRSDQGPQVDKKQFDKMLSCIELGKAEGATLLTGGKPCGEKGYYSGKSY…	Aldehyde dehydrogenase family 2 member C4; AltName: Full=ALDH1a; AltName: Full=Protein REDUCED EPIDERMAL FLUORESCENCE 1	0	22.008	12	6	7	5	1	1037	113.6	6.38	73	6	0	1.99	3.285	1.65	0.99	1.72	0.72	0.133538	0.00314121	0.318048	0.295759	0.0094198	0.886826	199.1	396.2	653.9	21.04	35.57	38.96	157.4	171.6	241.9	230.9	297.1	265.1	528.5	531.4	467.1	451.1	936.7	915.3	157.4	152.2
High	CDP09524	pep chromosome:AUK_PRJEB4211_v1:6:19723484:19730821:1 gene:GSCOC_T00028929001 transcript:CDP09524 description:Cystathionine beta-lyase, chloroplastic [Source:Projected from Arabidopsis thaliana (AT3G57050) UniProtKB/Swiss-Prot;Acc:P53780]	MASATCSPSSSLSLKSLVGSFSVDPIDLPGIGTKPGSFRCNTSGFGKQNHSLISKTFALHCARDKDIDVSASAFVDGIADHLTDIDVKEGEPREPREPSVSTMLMNFANEFDPYEALSTPLYQTATFKQPSATEYGPYDYTRSGNPTRDALERLLAKLDKADRALCFTSGMAALSAVTHLVGTGEEIVAGDDMYGGSDRLLSQVIPKTGVLVKRVDTANLDEVSSAISPMTKLVWMESPTNPRQQISDIHKIAEMAHANGALLLVDNSIMSPVLSQPLELGADIVMHSATKFIAGHSDLMAGVLAIKDESLARSLYFLQNAEGSGLAPFDCWLCLRGIKTMALRVEKQQDNAEKIAEFLSSHPRVKTVNYAGLPSHPGHALHYSQARGAGSVLSFLTGS…	Cystathionine beta-lyase, chloroplastic; Short=CBL; AltName: Full=Beta-cystathionase; AltName: Full=Cysteine lyase; AltName: Full=Cysteine-S-conjugate beta-lyase; Flags: Precursor	0	28.409	25	6	10	6	1	477	51.1	5.88	159	6	0	1.99	2.399	1.205	0.99	1.26	0.27	0.255124	0.104826	0.981321	0.495387	0.201775	1	556.9	1108.4	1336.2	18.86	21.05	19.4	458.2	483.4	641.5	664	935.4	916.2	1313.5	1360.1	1104	1136.8	1570.6	1573.9	458.2	428.8
High	CDP07233	pep chromosome:AUK_PRJEB4211_v1:10:22453:33189:1 gene:GSCOC_T00024438001 transcript:CDP07233	MVKETEYYDVLGVSPAATEAEIKKAYYIKARQVHPDKNPNDPQAAQNFQVLGEAYQVLSDPAQRQAYDNYGKSGISTEAIIDPAAIFAMLFGSELFEEYIGQLAMASMASLDIFTEGEDFDAKKLQEKMRVVQKEREEKLAEILKDRLNLYVQGNKEDFVCHAEGEVSRLSNAAYGVDMLNTIGYIYARQSAKELGKKAIYLGVPFVAEWFRNKGHFIKSQVTAATGAIALIQLQEDMKRQLSAEGNYTEEELEEYMQSHKKLMIDSLWKLNVADIEATLSRVCQMVLQDNNVKKEELRARAKGLKTLGKIFQRAKSANENETEMATKSPLHKLNGGDPVYDAFSVNTSARSSNTDDLPATPFVQQSPYVEAPQFSGGQYTYNFPMPTAPPGAQRHV	---NA---	0	19.67	19	3	4	3	1	397	44.4	5.45	107	3	0	1.989	1.895	0.953	0.99	0.92	-0.07	0.00520065	0.00674459	0.999903	0.0192997	0.0183559	1	212.3	422.4	402.3	17.36	21.69	25.56	244.5	251.2	182.1	184.4	518.1	494.5	360.8	334.8	538.4	485.2	333.7	325.4	244.5	222.8
High	CDP07352	pep chromosome:AUK_PRJEB4211_v1:10:929934:932939:1 gene:GSCOC_T00024591001 transcript:CDP07352	MQLQNHLIFKPPFLLFCFLIYIGCAKAQVSIPPKPDGFWYHNRAPNPDSVVIEAFFDPVCPDSRDSWKPLKEAIQNYGSSIALVVHTFPLPYHDNAFLASRALHIVDKLNVSVTYHLLEAFFGQQEKFYGRATSNLTRAFVQEEIARFVVDTVGRSYSPAIFGGFRDVNSDQATRISFKYGGLRGVYGTPTFFVNGFPLPDAGSALDNNGWLRILDPLVNKQDFFFFLRENRVPNTWLIVGALGVLEHKATTTLPEV	---NA---	0	8.258	15	3	6	3	1	257	29	7.53	92	3	0	1.987	0.952	0.479	0.99	-0.07	-1.06	0.505099	0.99983	0.41641	0.840307	1	1	502	997.5	477.7	30.04	60.07	49.75	387.4	386.9	650.4	667.6	578.7	523.4	1719.4	1768	304.4	292.4	749.6	750.5	387.4	343.2
High	CDP01098	pep chromosome:AUK_PRJEB4211_v1:10:5600281:5602831:-1 gene:GSCOC_T00034611001 transcript:CDP01098	MKGDYHRYLAEFKTGAERKEAAESTLTAYKAAQDIANTELAPTHPIRLGLALNFSVFYYEILNSPDRACNLAKQAFDEAIAELDTLGEESYKDSTLIMQLLRDNLTLWTSDMQDDGADEIKEAPKADNEQQ	---NA---	0	96.207	66	8	46	4	1	131	14.7	4.58	740	8	0	1.986	1.858	0.936	0.99	0.89	-0.1	0.000152197	0.000444359	0.973376	0.00127166	0.00185866	1	1029.4	2044.6	1912.8	7.44	12.82	13.24	1093.9	1086.3	944.4	975.4	2271.5	2272.5	1840.3	1797.4	2122.7	2143.5	1668.4	1723.6	1093.9	963.6
High	CDP09195	pep chromosome:AUK_PRJEB4211_v1:1:32382098:32386854:1 gene:GSCOC_T00028423001 transcript:CDP09195	MGSSSYRVCVCFTRKFKVAEVQPPSDVKEAFKEYAGGGTHMNAEQLRRFLVEVQGETEATLAQAEAVLQQILQKRHHITKLTRHALTVDDFFHFLFSVDLNPPIRYKVHHDMTAPLSHYFIFTGHNSYLTGNQLTSDCSDVPIIKALKKGVRVIELDIWPNSSKDDVHVLHGRTVTTPVELIRCLRSIKEHAFSASPYPVVITLEDHLPADLQAKVAQMLTETFGEILFCPESESLKEFPSPEDLKYRVIISTKPPKEYLEAKRLADKQNSQKERDSDDDGWGKEPSSTEAAADEEDDDKIDNGGSDCNQDDEDDDDSDDKPHQAPVYKSLIAIHAGKPKGGLVEALRVEPDKVRRLSLSEQALEKAAESHGMDVVRFTQKNILRVYPKGMRVTSSNYK…	---NA---	0.001	2.975	4	2	2	2	1	595	67.4	6.33	29	2	0	1.985	1.399	0.705	0.99	0.48	-0.5	0.139999	0.68842	0.751417	0.306995	0.9499	1	146.7	291.2	205.3	18.52	3.56	31.21	129.7	117.2	172.7	166	285.8	279.8	296.8	302.7	156.8	159.9	285	263.6	129.7	104
High	CDP16139	pep chromosome:AUK_PRJEB4211_v1:8:23272228:23274181:1 gene:GSCOC_T00017214001 transcript:CDP16139	MVLVLLLSHLNILGSSTVIAGSYVLAFYCGYYCLMDLLKLLCFLTSVSLGIAAEHADLEVYWKSKLPNTPMPKAVRDIIQNGKPPGVGALSASPQAIPFRYGRYMIRYGKNPTEGQLLNHQNVTVFFLKMDLHGGSIMNLHFVNLLENTAAFLPRQVADSIPFSSKSVPEILNKFSVNPNSVQAEAIKETIADCEEPGIEGEDKRCATSLESMVDFTTSKLGKNVGAISTEAQKPDPKILKYVIVDVSKLNNDDKAIVACHKQNYVYAVFYCHTLQHTDAYRVNLVGADDGAKVKAVVVCHQDTSAWNPKHVAFQLLKVKPGNVPICHFLPEDHFVSWALKH	BURP domain-containing protein 3; Short=OsBURP03; Flags: Precursor	0	32.374	30	6	9	5	1	342	37.7	7.71	312	6	1	1.983	3.202	1.615	0.99	1.68	0.69	0.0482282	0.000788844	0.251363	0.126231	0.00294376	0.753779	530.8	1052.6	1699.7	14.84	23.2	22.84	588.3	627.3	465.2	478.9	1296.8	1282.8	853.2	863.7	2058.5	2040.8	1415.7	1334.2	588.3	556.4
High	CDP01688	pep chromosome:AUK_PRJEB4211_v1:7:9554893:9559761:1 gene:GSCOC_T00036823001 transcript:CDP01688	MAFEKIKVANPIVEMDGDEMTRVIWKAIKDKLILPFLELDIKYFDLGLPHRDATDDKVTVESAEATLKYNVAIKCATITPDEARVKEFGLKAMWKSPNGTIRNILNGTVFREPILCKNVPRLVPGWNKPICIGRHAYGDQYRATDTVIKGAGKLKLVFVPEGADEKTELEVFNFTGAGGVALSMYNTDESIHAFADASMNVAYQKKWPLYLSTKNTILKKYDGRFKDIFQEVYEANWKSKFEAAGIWYEHRLIDDMVAYALKSEGGYVWACKNYDGDVQSDFLAQGFGSLGLMTSVLVCPDGKTIEAEAAHGTVTRHYRVHQKGGETSTNSIASIFAWTRGLAHRAKLDDNPRLLDFTEKLEAACIGTVESGKMTKDLALIIHGPKLSRERYLNTEEFI…	Isocitrate dehydrogenase [NADP]; Short=IDH; AltName: Full=IDP; AltName: Full=NADP(+)-specific ICDH; AltName: Full=Oxalosuccinate decarboxylase	0	135.207	45	19	86	14	1	416	46.5	6.99	1492	19	4	1.98	2.805	1.416	0.99	1.49	0.5	0.0641408	0.00389628	0.60045	0.16158	0.0113494	1	4774.7	9454.9	13391	19.96	27.95	32.02	5645.3	5714.9	3975.2	4038.3	12477.7	11857.6	7539	7346.3	17857.4	17744.7	10037.4	10105.5	5645.3	5069.2
High	CDO97787	pep chromosome:AUK_PRJEB4211_v1:4:499997:504461:1 gene:GSCOC_T00021691001 transcript:CDO97787	MFLGDGRTKTIITASRNVVDGSTTFHSATVAAVGERFLARDLTFQNTAGSSKHQAVALRVGSDLSAFYQCDILAHQDTLYAHSNRQFYINCLIAGTVDFIFGNGAAVFQDCDIHARLPGSGQKNMVTAQGRIDPNQNTGIVIQKCRIGATSDLRPVQQNFPTFLGRPWKEYSRTVVMQSTVTDVIDPAGWHEWNGNFALSTLFYAEYQNTGAGAGTSGRVKWKGYKVITSAAEAQAFTPGRFIDGNSWLGATGFPFALGL	---NA---	0	31.218	36	6	15	5	1	260	28.2	8.46	355	6	1	1.98	1.119	0.565	0.99	0.16	-0.82	0.0165748	0.967488	0.0550409	0.0511538	1	0.26279	1353.6	2679.5	1514	12.38	39.74	29.39	1511.2	1484.5	1234.2	1185.9	3905.1	3778.7	1900.1	1852.6	1985.5	1947.2	1177.2	1160.7	1511.2	1316.8
High	CDO99641	pep chromosome:AUK_PRJEB4211_v1:2:10416301:10419569:-1 gene:GSCOC_T00029292001 transcript:CDO99641	MAGGGFVGPDGGKTYPGNLTLFVTVTCVVAAMGGLIFGYDIGISGGVTSMDSFLHKFFRSVYDKKNDHKSTNQYCKFDSETLTMFTSSLYLAALASSLVASTVTRKMGRKLSMLFGGVLFLAGALVNGFARKVWMLIVGRILLGFGIGFANQSVPLYLSEMAPYKYRGALNIGFQLSITIGILVANVLNYFFAKIKGGWGWRLSLGGAMVPALIITVGSLILPETPNSMIERGQTNEAKARLIRIRGIDNVDEEFNDLVAASEASKMVEHPWRNILQRKYRPQLTMAIAIPFFQQFTGINVIMFYAPVLFQTIGFKSNASLMSAVITGIVNVVATMVSIYGVDKWGRRALFLEGGVQMLICQIIVSICIGVKFGVNGDPGDLPKWYAVVVVLFICIYVA…	Sugar carrier protein C	0	5.991	4	1	4	1	1	520	57.6	9.25	81	1	0	1.97	3.663	1.859	0.98	1.87	0.89	4.80196e-08	2.67806e-11	4.74592e-07	3.09552e-06	2.40124e-09	5.0121e-05	115	226.5	421.2	5.82	7.74	6.66	111.7	118.4	106.6	121.4	261	224.7	228.4	222.3	455	433.5	409.2	390.6	111.7	105
High	CDP01691	pep chromosome:AUK_PRJEB4211_v1:7:9532865:9539868:1 gene:GSCOC_T00036827001 transcript:CDP01691	MATAATLNPAEAEKLEKLKAATAALNQISENEKSGFINLIARYLSGEAQYVDWSKIQTPTDEVVVPYDTLAPVSEDPAETKKLLDKLVVLKLNGGLGTTMGCTGPKSVIEVRNGLTFLDLIVIQIETLNKKYGCNVPLLLMNSFNTHDDTLKIVEKYAKSNIEIHTFNQSQYPRLVVEDFMPLPSKGNTGKDAWYPPGHGDVFPSLMNSGKLDALLSQGKEYVFVANSDNLGAVVDLKILNHLISNKNEYCMEVTPKTLADVKGGTLISYEGRVQLLEIAQVPDEHVNEFKSIEKFKIFNTNNLWVNLKAIKRLVQESALKMEIIPNPKEVDGVKVLQLETAAGAAIRFFDRAIGINVPRSRFLPVKATSDLLLVQSDLYTLSDDGYVVRNEARKNPTN…	UTP--glucose-1-phosphate uridylyltransferase; AltName: Full=UDP-glucose pyrophosphorylase; Short=UDPGP; Short=UGPase	0	109.773	34	14	69	14	1	477	52.5	6.24	1092	14	0	1.97	1.789	0.908	0.98	0.84	-0.14	3.48976e-06	2.76128e-05	0.674048	8.20516e-05	0.00018084	1	3701.9	7292.5	6623	9.74	10.55	10.31	3982.9	4099.5	3396.2	3440.8	8249.4	7880.7	6728.4	6748.2	7219.1	7257.8	6029.5	6076.2	3982.9	3636.3
High	CDO97586	pep chromosome:AUK_PRJEB4211_v1:2:20162298:20167102:-1 gene:GSCOC_T00014968001 transcript:CDO97586	MAGESSAAAATLAVSPVTEEEITLTVKWSGKEYTVRVCGDDTVGELKRRICEVTNVLPKRQKLLYPKVGSKLSDDSALLSQLSLKSSLKMTMIGTVEDDIYVDLVDPPEVVDDFELGQDEVIEIKDKEVNKQKLRRRIEQYKIVLRNPCREGKKLLVLDIDYTLFDHRSSAENPIELMRPYLHEFLTAAYAEYDIIIWSATNMKWVELKMGQLGVLDHPNYKITALLDHLAMITVQSDTRGVFDCKPLGLIWAHFPEFYSSKNTIMFDDLRRNFVMNPQNGLAIKPFRKAHANRGTDEELLKLTQYLLAIADIDDLSSIDHSDWESFNEDSYKRRRQE	Ubiquitin-like domain-containing CTD phosphatase; AltName: Full=Nuclear proteasome inhibitor UBLCP1	0	16.518	12	3	6	3	1	338	38.7	5.44	104	3	0	1.969	2.854	1.45	0.98	1.51	0.54	0.251357	0.0348346	0.774337	0.489342	0.0778902	1	723.2	1424	2064.2	4.46	5.67	1.43	679.5	735.1	711.6	754.1	1413.7	1335.3	1434.4	1532.1	2027.4	2046	2089.1	2082.7	679.5	652
High	CDP19676	pep supercontig:AUK_PRJEB4211_v1:scaffold_611:48240:61150:1 gene:GSCOC_T00009747001 transcript:CDP19676 description:Calcium-dependent protein kinase 12 [Source:Projected from Arabidopsis thaliana (AT5G23580) UniProtKB/Swiss-Prot;Acc:Q42396]	MHRDLKPENFLFTSADEDAALKATDFGLSVFYKPGETFCDVVGSPYYVAPEVLRKHYGPESDVWSAGVILYILLSGVPPFWAETEMGIFRQILQGKLDFESEPWPGISNIAKDLIRKMLDRNPKRRLTAHEVLCHPWIIDDNMAPDKPLDSAVLSRLKQFSAMNKLKKMALRVIAERLSEEEIGGLKELFRMIDTDNSGTITFDELKEGLRRVGSELMESEIKDLMEAADIDNSGTIDYGEFLAATVHLNKLEREENLVSAFSFFDKDGSGYITIDELQQACKEFGLSELHLDEMIKEIDQDNDGQIDYGEFAAMMRKGNGGVGRRTMRNTLKLGEALGVYQNSE	Calcium-dependent protein kinase SK5; Short=CDPK	0	20.006	23	4	6	4	1	345	38.9	4.88	97	4	0	1.965	2.642	1.345	0.97	1.4	0.43	0.594478	0.271463	0.965846	0.951595	0.456356	1	246.7	484.7	651.7	76.29	43.93	33.48	115.1	107.2	528.8	556.5	314.1	332	730.4	707.5	467.9	489.6	867.4	871.3	115.1	95.1
High	CDO99036	pep chromosome:AUK_PRJEB4211_v1:3:2680715:2686394:-1 gene:GSCOC_T00026046001 transcript:CDO99036	MVAGGMSVGGGKEFEAKITPVVVISCILAATGGLMFGYDVGISGGVTSMGPFLKKFFPVVYRRTQDDGLNSNYCKYDNQGLQLFTSSLYLAGLTATFFASYTTRKLGRKVTMLIAGCFFICGVTLNAAAQDLAMLIMGRILLGCGVGFANQAVPLFLSEIAPTRIRGALNILFQLMVTIGILFANLVNYGTAKIKGGWGWRLSLGLAGIPAGLLTLGALIVVDTPNSLIERGRLEEGKAVLRKIRGTDNIEPEYEELLEASRVAKQVKHPFRNLLMRRNRPQLVIAVALQIFQQFTGINAIMFYAPVLFNTVGFGGNASLYSAVITGAVNVLSTLVSIYSVDKVGRRMLLLEAGVQMFISQVVIAIILGIKVKDHSESLSHGWAIFVVILVCTFVSSFA…	---NA---	0	5.163	3	1	2	1	1	526	57.5	9.1	72	1	0	1.962	1.152	0.587	0.97	0.2	-0.77	0.0246018	0.906215	0.105096	0.0711288	1	0.419522	39.9	78.2	45.9	31.79	16.49	22.65	31.5	30	50.5	56.6	61.2	74.1	82.6	91.1	40.1	38.3	61.3	52.7	31.5	26.6
High	CDP04934	pep chromosome:AUK_PRJEB4211_v1:2:233713:236363:-1 gene:GSCOC_T00019804001 transcript:CDP04934	MASNLVRSVLTRPSSSSSNLVGSGRRSLTGGGAVTSEIITTHTEKWMQDTTQKSPMQLINEVPPIKVEGRIVACEGDSNPALGHPIEFICLDKEEPAVCKYCGLRYVQDHGSHHH	NADH dehydrogenase [ubiquinone] iron-sulfur protein 6, mitochondrial; Flags: Precursor	0	10.697	26	1	3	1	1	115	12.5	7.08	80	1	0	1.958	2.163	1.105	0.97	1.11	0.14	0.852324	0.771363	0.999812	1	1	1	91.8	179.7	198.5	78.16	81.21	82.35	34.8	43.2	207.5	195.1	69.2	77.1	418.9	420.3	82.4	78.1	478.1	480.3	34.8	38.3
High	CDO99735	pep chromosome:AUK_PRJEB4211_v1:2:9380500:9387833:1 gene:GSCOC_T00029413001 transcript:CDO99735	MENPNPTMSPNPDANQLPEADSLPDGFVESSSTVDQLGPETPKTEDEDKEPEPIDYKEEKLVDPNLRPQLVGDGDLDLVEEKSEEATAVVAGSENAESSRGNAQVEEDCQSSGKCPQVDSKGMSSSGNAENNKKAEATEGKRKNAKRTFKSEKEILEFTLKYQHVLAERDSAIAVRDKLESLCRELQRQNKTLMDECRRVSTESQNLRQDLSNKFQDAIKEVSNKLDEQKDECLSQLKENEMLKYKLKELADQYALSEQQHAQKLKQKELELQLADLKLKQHEEKLVQEQSQMKLYAEQVSHLLATEKNLRLQLTADGDKFQQFQEALMKSNEVFETFKQEIEKMAKSIKELKKENAFLKNKCEKSDISLIELVEERELLKKQLERTRNQKEKLEALCR…	---NA---	0	18.751	16	4	5	4	1	420	47.7	5.06	78	4	0	1.958	1.468	0.75	0.97	0.55	-0.42	0.315685	0.700358	0.953102	0.591279	0.961262	1	178.3	349.1	261.8	46.43	19.92	51.18	265	260	102.5	122.3	401.6	398.7	265.2	305.6	448	405.8	168.9	162.9	265	230.6
High	CDP05951	pep chromosome:AUK_PRJEB4211_v1:5:25768828:25776266:1 gene:GSCOC_T00021276001 transcript:CDP05951	MEEEYSVDPALLLAAATDFASHPGTQSDASAQEFLNRFPLPAIINALQTKADYPGLENALVDSLERIFKTKYGASLIPHFMPFVVVGLGADSQKVRYLACETVSCLLENIDDSTAVHLIHQYAVYPLLLNCVIDGDEQVATVSMDAIKNLGGSPNGLAIIFPANISEPTQLGNLAGKCSSLGRVRVLALIVKLFSISSSVASLVYSSKLLSLLEREVSNTNDTLVTLTVLELLYELAEVQHSTEFLSRTMLLQLMSSIIRNASAESILRSRAMMITGRLLSKENAVRFIDESSFRAVVLAIDRRFDFLESQDADECECALEALGQVGLSNQGAVLLLTGSPPAARHVIDAAFDRQQHNKQLAALHALATIAGEPRSENDVILTGGAEENLQRLIYEMAS…	---NA---	0	12.421	6	2	2	2	1	523	57.2	5.55	76	2	0	1.955	1.72	0.88	0.97	0.78	-0.18	0.4343	0.647824	0.995157	0.750484	0.909147	1	28	54.7	48.2	52.99	48.84	29.15	15.8	18.8	41.6	49.5	36.9	36.4	81.2	96	39.1	36.9	59.4	66.5	15.8	16.7
High	CDP01094	pep chromosome:AUK_PRJEB4211_v1:10:5632713:5636577:-1 gene:GSCOC_T00034607001 transcript:CDP01094	MALTSTHSSLLPNKAFVHHPQPSPKAPIFITNPSSKPTIRSIQPISAVQSADKSPKTTPPSATVSSTAAPAATPAVKETSPTKWNPESWKTKKALQLPEYPDQAELESVLRTLDAFPPIVFAGEARSLEERLGEAALGNAFLLQGGDCAESFKEFNANNIRDTFRILLQMGAVLMFGGQMPVIKVGRMAGQFAKPRSEPFEEKNGVKLPSYRGDNVNGDAFDAKSRAPDPQRMIRAYCQAAATLNLLRAFATGGYAAMQRVTQWNLDFTEHSEQGDRYRELAHRVDEALGFMAATGLTIDHPIMTTTEFWTSHECLLLPYEQSLTRLDSTSGLYYDCSAHFLWVGERTRQLDGAHVEFLRGVANPLGIKVSDKMDPNELVKLIEIFNPQNKPGRITIIT…	Phospho-2-dehydro-3-deoxyheptonate aldolase 1, chloroplastic; AltName: Full=3-deoxy-D-arabino-heptulosonate 7-phosphate synthase 1; AltName: Full=DAHP synthase 1; AltName: Full=Phospho-2-keto-3-deoxyheptonate aldolase 1; Flags: Precursor	0	24.064	19	6	11	5	1	536	59.3	8.48	116	6	1	1.95	1.082	0.555	0.96	0.11	-0.85	0.0229629	0.985648	0.0594934	0.0673661	1	0.276573	718.4	1400.9	777.5	5.93	1.83	10.94	641.3	716.1	733.3	720.7	1364.9	1387.9	1420.7	1414	861.2	841.8	693.3	718.1	641.3	635.2
High	CDP16886	pep chromosome:AUK_PRJEB4211_v1:11:776006:780315:1 gene:GSCOC_T00019469001 transcript:CDP16886	MATKKSVGSLKEADLKGKRVFVRVDLNVPLDDNFNITDDTRIRAAVPTIKYLIGHGAKVILSSHLGRPKGVTPKYSLKPLVGRLSELLGVEVKMADDCIGEQVEKLVATLPEGGVLLLENVRFYKEEEKNDPEFAKKLASLADLYVNDAFGTAHRAHASTEGVAKYLKPAVAGFLMQKELDYLVGAVANPKKPFAAIVGGSKVSTKIGVIESLLAKVDILLLGGGMIFTFYKAQGHSVGSSLVEEDKLDLALSLIEKAKAKGVSLLLPTDVVAADKFAADANSKVVPASGIPDGWMGLDIGPVSIKSFSEALDTTKTIIWNGPMGVFEFDKFAAGTDTIAKKLAELSGNGVTTIIGGGDSVAAVEKAGLADKMSHISTGGGASLELLEGKSLPGVLALD…	Phosphoglycerate kinase, cytosolic	0	165.254	60	21	67	12	1	401	42.1	6.83	1497	21	6	1.948	1.87	0.96	0.96	0.9	-0.06	0.000296666	0.000532702	0.997426	0.00210018	0.00215329	1	4276.6	8330	7998.1	1.98	7.84	1.9	4334.1	4153.6	4321.6	4232.1	7885.6	7546.2	8825.2	8799.5	7738.4	7941.8	8062.1	8054.9	4334.1	3684.3
High	CDP03602	pep chromosome:AUK_PRJEB4211_v1:1:36491413:36495141:-1 gene:GSCOC_T00016018001 transcript:CDP03602	MGSAPSVPQTSIHEFTVKDSKGKDVDLSNYKGKVLLVVNVASKCGFTNSNYTQLTELYSKYKDKGFEILAFPCNQFLKQEPGTSEEAEQFACTRFKAEYPIFSKVRVNGPTAAPVYKFLKASKGSWFGSSIKWNFTKFLVDKEGRVIRRYGTSTQPSAIEADIQKALGDI	Probable glutathione peroxidase 4	0	27.17	25	3	6	2	1	170	18.9	9.2	144	3	0	1.948	0.92	0.472	0.96	-0.12	-1.08	0.230646	0.999971	0.196629	0.456508	1	0.650034	349.2	680.2	321.3	46.5	20.1	31.34	204.3	238.6	511.1	525.2	589	575.9	857.1	785.5	249.5	247.3	448.6	413.7	204.3	211.6
High	CDP09262	pep chromosome:AUK_PRJEB4211_v1:1:16702937:16714971:-1 gene:GSCOC_T00028515001 transcript:CDP09262	MKTVCVTGASGYIASWLVKFLLQRGYTVKASVRDLNDPKKVEHLLALDGAKERLQLFKANLLEEGSFDAAIDGCDGVFHMASPFYHTVTDPQAELIDPALKGTLNVLGSCAKSPSVKRVVLTSSIAAVAFNGKPRTPDVVVDETWWSLPEFCKQTKLWYVLSKTLAEDAAWKFVKEKGLDMVTINPAMVIGPLLQPTLNTSAAAILNLINGAETFPNSSMGWVDVKDVANAHILAFENPSASGRYCLVERVVHYSEVVKILREIYPSSKLPEKCADDKPFVPTYQVSKEKAKSLGLEFIPVEQSIKETVESLKEKNFLNSSAAL	---NA---	0	35.509	35	7	11	6	1	324	35.5	6.99	139	7	1	1.945	1.852	0.952	0.96	0.89	-0.07	0.00141694	0.00328585	0.989638	0.00670513	0.00981477	1	559.4	1087.7	1036	9.21	6.12	20.17	538.2	559.4	559.3	656.9	1181.6	1120.8	1033	1055.7	1229.1	1237.1	859.8	873.2	538.2	496.2
High	CDP09514	pep chromosome:AUK_PRJEB4211_v1:6:19515193:19517011:-1 gene:GSCOC_T00028908001 transcript:CDP09514	MAERFVKQAKEYSASRPIYPEELFQFVASKTPCHDLVWDAGTGSGQAATSLARIYKNVVATDTSPTQLEHAVKLPNIKYHCTSPKMSIAELKQSIAAESSVDLVTIATAIHWFDLPSFYQQVKCVLKKPNGVIAAWSYTLPRINKNLDTLLTKLYYVGAAPFGGPPPKLIMEENYRTIDFPFEPVDGLENTGPLELKMEKLIDLDGYFTLIKSWSAYQAAKENGVELLGEDLVKDFTLAWNEDGKQEKIATWPVYMRIGKVGNQ	---NA---	0	44.241	38	8	17	8	1	264	29.5	6.24	217	8	0	1.939	4.32	2.228	0.95	2.11	1.16	0.120733	0.000314363	0.0438933	0.272166	0.00139602	0.220739	228.2	442.4	985.8	30.85	41.13	37.72	293.2	307.9	170.8	177.6	628.4	653.8	311.4	298.1	1376.6	1384.8	695.7	706	293.2	273.1
High	CDP09056	pep chromosome:AUK_PRJEB4211_v1:1:31394671:31397911:1 gene:GSCOC_T00028239001 transcript:CDP09056	MIPLIHHAIDSGITHLDTSDAYGPHTNEILIGKALKGGYREKVQLATKFGHVIREDGTRAGVCGEPAFVRAACEASLKRLDVDYIDLYYVHRIDTRVPIEATVGELKKLVEEGKVKYIGLSEASPETIRRAHAVHPITAVQLEWSLWTRDAEESVIPTCRELGIGIVAFGPLGSGFLASGPKLVENLNTTPDFDARKANPRFQPENVQHNLKMYERVEEMASRKGCTPSQLALAWVHHQGDDVCPIPGTTKIQNLESNIKALSVKLTSEEVAELESIANAIKGERLAPQYLALTWRFANTPPLSSWKAT	Probable aldo-keto reductase 2; AltName: Full=ARF-GAP domain-containing protein 2	0	77.87	54	15	38	8	1	309	34	6.74	469	15	0	1.936	2.778	1.435	0.95	1.47	0.52	0.0794174	0.00373999	0.519157	0.192636	0.0109329	1	796	1541.3	2211	28.93	32.17	38.28	610.5	619.8	1022.3	1030.4	1174.1	1121.5	2042.4	2023.4	1552	1578	3098	3135.3	610.5	549.8
High	CDO99144	pep chromosome:AUK_PRJEB4211_v1:3:3620027:3628961:-1 gene:GSCOC_T00026189001 transcript:CDO99144	MSYPRNRMTKVTKPLLRLPPKRAKTIARLPPQWQCYTPLNSILPFSHSPSQLPSRLLSSHLFKPFSSTAFSQSKKRFASSLAMDSSGVSSFPENPVGLDRVCEEEYTSQSRLLQEFTEIATIDKAWAFTSSSGYGSKGMFAISQPNLLANVRRRYILSSHISNRSSDSVSFEWAPFPVEMTGVFTIVPSPSGSKLLVVRNAENDSPTRFEIWGPAQVEKEFQVPRSIHGSVYADGWFEGISWNFDETLIAYVAEEPVPSKPTFTCFGYKKGNTTEKDMGNWKGQGEWEEDWGETYAGKRQPALFVINIISGEVQAVEGVGRFLSVGQVVWAPAAENSNQYLVFVGWPSDARKLGIKHCYNRPCALYAVTAPFSKSQATNSGDNASKDVAVIALTQSISS…	---NA---	0	35.96	12	6	10	6	1	853	92.9	8.19	176	6	0	1.936	2.446	1.263	0.95	1.29	0.34	0.00896254	0.000612338	0.593949	0.0303448	0.00238527	1	185.6	359.4	454	6.64	3.4	8.91	191	201.1	172.8	180.4	355.9	347.4	376.3	363	511.1	474.7	434.2	420.7	191	178.4
High	CDP08757	pep chromosome:AUK_PRJEB4211_v1:2:53288791:53294364:1 gene:GSCOC_T00027846001 transcript:CDP08757	MLVSPPSLLNTANTIQSILRPRLPFRFILIPPPRYFLPHLNSLFPPSRTSPSKPNPLFRTPNLTAMYSTAKAKAISADSSPDHVVGNWYSVPDLRLRDHRFSVPLDYSRNQSYTTTTPKISIFAREVVAAGKEDQSLPYLLYLQGGPGFESPRPTEASGWIGKACEEYRRGTGLSTPLTPSSMLQLKSAEEQASYLCHFRADNIVQDAEFIRKCIVPDGGPWTVLGQSYGGFCIVTYLSFAPHGLKQALITGGIPPIRSGCSAEAVYRACFEQIVHQNEKFYERFPLDIEIVQDVVKHLAETGGVRLPSGGILTPRGLQILGLTALGSSTGFERLHYMLERVWDPVIVPGERKRISYNFLNAYENWLSFDTNPLYALLHESIYCQGAASRWAAHRTWFE…	---NA---	0	21.459	10	3	4	3	1	527	59	7.39	138	3	0	1.935	2.8	1.447	0.95	1.49	0.53	0.0846838	0.00582388	0.632659	0.203584	0.0160989	1	85.3	165.2	238.9	6.54	25.48	18.79	87.4	92	78.9	83.3	132.6	137.6	198.2	220.6	207.7	194.2	274.8	281.6	87.4	81.6
High	CDO97225	pep chromosome:AUK_PRJEB4211_v1:2:17423939:17425581:1 gene:GSCOC_T00014494001 transcript:CDO97225	MGSHSLPCSLVHVFLVSFPGQGHVNPLLRLGKRLAAKGLLVTLSAPELIGKEIRKANQMSDEPTPVGDGMIRFEFFDDEWVEDENKAFCIGEYTKHLEVAGRKILPGVIKKQEEQGLPVACIINNPFIPWVSDVAESLHIPSAILWVQSCACFSAYYHYCHALAPYPTDAEPEIDVQLPSMPLLKHDEIPSFLHPTTPYPFLREAILGQFTNLSKSFCILMDTFQELEHDVINYVAKLCPVRPIGPLFKNPKAPASNVSVDILKADDCIGWLDSKPPASVVYISFGSIVFLKEEQIAELAYGLLDSEVSFLWVVRPRSKDSGYQEVVLPDGFLEKAGDKGKIVRWSPQEQVLAHPSVACFLSHCGWNSTLEALASGMPVLAFPQWGDQVTDAKYLVDEF…	---NA---	0	38.222	17	7	12	7	1	483	53.7	5.55	208	7	0	1.923	2.704	1.406	0.94	1.44	0.49	0.720939	0.371164	0.969675	1	0.593706	1	1152.1	2215.5	3115.3	26.13	15.52	20.52	1413.9	1432.8	862.1	938.8	2582.1	2510.5	1934.5	1955.1	3725	3710.5	2615.6	2576.9	1413.9	1270.9
High	CDP04332	pep chromosome:AUK_PRJEB4211_v1:9:2034969:2039733:1 gene:GSCOC_T00017687001 transcript:CDP04332 description:Leucine aminopeptidase [Source:Projected from Arabidopsis thaliana (AT5G13520) UniProtKB/Swiss-Prot;Acc:Q9FY49]	MAAVDPHSFTDSTHPLTTHISLSLYFDFPSSTILASTLISLPTTHSGPFTLDTRSLSITSVLDPTTLTPLPFTLTPPIPHPVFGQSLIITLSNHSQVIIISKTSASSSALQWLSPPQTFNQAFPFVYTQCQSIHARSIFPCQDTPAARIRYDAKLNIPRQLFAVMSARHVDRRAPVVGSGEARGACDDSLWCGDDRVVDDFLMEQPIPPYLFAFAVGELGFRDVGPRSRVYSEAAPAVLDAAAREFAGTEDMIRVGEKLFGPYDWERFDLLVLPPSFPYGGMENPRMVFLTPTVIKGDATGAQVVAHELAHSWTGNLITNKTNEHFWLNEGFTTYAERRIVEAVQGEDRAALNIGIGWKGLVDAVERFKDNMEFTKLKTNQEGVDPDEIYSEIPYEKGF…	Leucine aminopeptidase; AltName: Full=Epoxide hydrolase; AltName: Full=Leukotriene A-4 hydrolase homolog; Short=LTA-4 hydrolase	0	37.872	14	8	15	8	1	615	69.2	5.54	302	8	0	1.923	2.643	1.374	0.94	1.4	0.46	7.95267e-05	7.00367e-07	0.0477171	0.000789106	9.47562e-06	0.236097	722.9	1390.1	1910.5	12.04	10.12	15.82	645.7	668.9	828.9	781.4	1288.2	1292.1	1495.6	1568.3	1677	1676.6	2238.2	2176.5	645.7	593.3
High	CDP17101	pep chromosome:AUK_PRJEB4211_v1:1:37485189:37492462:-1 gene:GSCOC_T00005020001 transcript:CDP17101	MAMLVASRRLSIGSRTVTTSLFRCFSTSFREERDTFGPILVPSDKLWGAQTQRSLQNFEIGGERERMPEPIIRAFGILKKCAAKVNMEYGLDPVIAKAIMQAAQEVAEGKLNDHFPLVVWQTGSGTQSNMNANEVIANRAAEILGHKRGGKFVHPNDHVNRSQSSNDTFPTVMHIAAAVEVNLRLIPNLKQLQTSLHSKSIEFKDIVKIGRTHTQDATPLTLGQEFSGYTTQVKYGIDRVLCTLPRLYQLAQGGTAVGTGLNTKKGFDVKIAAAVAEETKLPFVTAENKFEALAAHDAFVETSGALNTVATSLMKIGNDIRFLGSGPRCGLGELILPENEPGSSIMPGKVNPTQCEALTMVCAQVMGNHVAITVGGSNGHFELNVFKPLIASCLLHSLR…	Argininosuccinate lyase; Short=ASAL; AltName: Full=Arginosuccinase	0	32.309	21	7	17	7	1	489	52.9	8.27	279	7	0	1.923	2.433	1.265	0.94	1.28	0.34	0.0276463	0.00222947	0.693236	0.0784877	0.00702533	1	889.7	1711.2	2164.6	13.25	16.6	22.08	800.5	819.3	966.1	1052.2	1528	1442.2	1916.4	2027.7	1799.1	1804	2702	2597.2	800.5	726.7
High	P25795	Aldehyde dehydrogenase family 7 member A1 OS=Pisum sativum OX=3888 PE=1 SV=3	MGSDSNNLGFLKEIGLGATNIGSFINGQWKANGPTVHSVNPSTNQVIASVTEATLDDYEEGLRASSEAAKTWRTVPAPKRGEIVRQIGDALRAKLDPLGRLVALEMGKILAEGIGEVQEIIDMCDYSVGLSRQLNGSIIPSERPEHMMFEVWNPLGIVGVITAFNFPCAVLGWNACIALVGGNTVVWKGAPTTPLITVAVTKLIAEVFERNNLPGAIFTALCGGADIGHAIAKDTRIPLVSFTGSSKVGALVQQTVSQRFGKTLLELSGNNAIIVMDDADITLAVRSIFFAAVGTAGQRCTTCRRLYLHESVYANVLEQLTALYKQVKIGNPLEEGTLVGPLHTRSAVENFKNGISAIKSQGGKIVTGGSVLESEGNFVVPTIVEISADAAVVKEELFA…	Aldehyde dehydrogenase family 7 member A1; AltName: Full=Antiquitin-1; AltName: Full=Turgor-responsive protein 26G	0	10.482	6	2	3	1	1	508	53.8	5.8	94	2	0	1.917	2.732	1.425	0.94	1.45	0.51	0.00244102	9.23502e-05	0.200766	0.0105345	0.000495566	0.66034	19	36.4	51.8	11.63	24.87	19.83	18.9	19.1	18.7	23.5	31.6	30.3	41.9	50.8	39.9	45.1	59.9	59.5	18.9	16.9
High	CDP00069	pep chromosome:AUK_PRJEB4211_v1:2:6437240:6441617:1 gene:GSCOC_T00029848001 transcript:CDP00069	MAKEVSNGENHVTTKPPPEPSPLRNAKFFQANMRILVTGGAGFIGSHLVDRLMQNEKNEVIVVDNYFTGSKDNLKQWIGHPRFELIRHDVTEPLLVEVDQIYHLACPASPIFYKYNPVKTIKTNVIGTLNMLGLAKRVGARILLTSTSEVYGDPLVHPQTESYWGNVNPIGVRSCYDEGKRVAETLMFDYHRQHGIEIRIARIFNTYGPRMNIDDGRVVSNFIAQAIRDEPLTVQLPGTQTRSFCYVSDMVDGLIRLMEGEHTGPVNIGNPGEFTMIELAETVKELINPEVEIITVENTPDDPRQRKPDITKAKELLGWEPKVKLREGLPLMEGDFRKRLEISRKN	UDP-glucuronic acid decarboxylase 6; AltName: Full=UDP-XYL synthase 6; AltName: Full=UDP-glucuronate decarboxylase 6; Short=UGD; Short=UXS-6	0	69.123	35	9	16	5	1	346	39.1	6.81	403	9	3	1.917	2.03	1.059	0.94	1.02	0.08	0.492191	0.407952	0.999856	0.825179	0.642958	1	502.8	964	1020.8	38.24	59.49	59.32	693.1	733.5	364.8	353.8	1762	1649.4	563.4	532.1	1785.7	1835.6	583.5	580.4	693.1	650.6
High	CDP05940	pep chromosome:AUK_PRJEB4211_v1:5:25844169:25848270:1 gene:GSCOC_T00021264001 transcript:CDP05940	MAGKEMLQKMKEKVGLGSSASETGKGKSKMDKHVTHGYHTVAGKGHHAMEDYLFAQFKQVGDNELGLFAIFDGHLGHEIPDYLRSHLFDNILNEPDFWTQTENAIRRAYRITDATILEKAVDLGKGGSTAVTAILINCQKLVVANVGDSRAVLCKNGVAKQLSVDHEPNKERQNIENRGGFVSNFPGDVARVDGQLAVARAFGDKSLKQHLSSEPDVAVEIIDDDTEFVILASDGIWKVMSNQEAVDCVKDKKEARAAAKHLTEEAVARKSSDDISCIVIKFK	Probable protein phosphatase 2C 39; Short=AtPP2C39	0	14.658	14	3	5	3	1	283	31	6.61	137	3	0	1.915	1.2	0.627	0.94	0.26	-0.67	0.0755826	0.924909	0.287342	0.185134	1	0.82917	227.6	435.7	273.1	11.41	4.04	0.87	209.2	202.1	247.6	253	430.3	441.2	454.3	412.8	274.2	269	272.3	273.9	209.2	179.3
High	CDP12153	pep chromosome:AUK_PRJEB4211_v1:8:30664487:30675214:-1 gene:GSCOC_T00035551001 transcript:CDP12153	MSGKNYIIEVEPAKPAKDGKPSIGPVYRSVFAKDGFPPPIEGLDSCWDIFRLSVEKYPNNRMLGRREIVDGKPGKYVWQTYKEVYDLVVKVGNSIRSCGIEEGGRCGIYGANCAEWIMSMEACNAHGLHCVPLYDTLGAGAVEFIICHAEVTIAFVEEKKIPELLKTFPNATKYLKTIVSFGKVTSQQKDEIEKFGVVVYAWDEFLLLGENKNYDLPLKRKSDICTIMYTSGTTGDPKGVMISNNSIVTLIAGVKRLLVSVNESLTVNDVYLSYLPLAHIFDRVIEECFINHGASIGFWRGDVKLLVEDIGELKPTIFCAVPRVLDRIHSGLQQKISAGGFIKQTMFNFAYAYKLRNLRKGLKHDEAAPICDKIVFSKVKQGLGGKVRLILSGAAPLAS…	Long chain acyl-CoA synthetase 4	0	75.258	30	15	33	15	1	658	73.6	7.06	463	15	0	1.914	1.842	0.962	0.94	0.88	-0.06	0.000678149	0.00115533	0.998385	0.00400552	0.00401103	1	1825	3493.7	3361.3	2.66	3.22	2.02	1760.1	1798.8	1851.6	1864.9	3589.5	3562.8	3425.9	3353.8	3428	3416.1	3302.3	3307.5	1760.1	1595.6
High	CDP02389	pep chromosome:AUK_PRJEB4211_v1:7:3471547:3473754:1 gene:GSCOC_T00039755001 transcript:CDP02389	MLKKVRRKVVTAITKPFKKKGRKPPPPPPPTEPEPAPPSPASPSPPQSPTMSPPKRKHTQPFLFPQSQSVVLPDPSTFFSPNLLSSPLPTNSFFQNFVLKNGDQPEYIHPYLIKSAVSALTVCYPSQSHNSAFIYQIFNADLTISTLNNPNPNATHIISSFSDLSVTLDHPSSNLRFFLVRGSPFLTCNVMGNVALSISTVHAIIGFSSNASLTKYTIKLNNNQTWLLYASSPISLTHDISSITSGVFTGIIRIAALPDSDSRSEAILDRFSSCYPLSGDAIFNRPFCLEYKWEKRGWGDLLMLAHPLHLKLLSSGDCSLTVLDNFKYNSIDGELVGVVGDSWLLKSDPISVNWHSIKGVREETQEEIVNALIKDVEALSTTSISTTSSYFYGKLIARA…	---NA---	0	41.084	14	7	17	7	1	735	82	6.64	180	7	0	1.914	1.783	0.932	0.94	0.83	-0.1	0.00631504	0.0186823	0.978982	0.0227922	0.0449205	1	378.6	724.5	675.1	6.81	5.03	9.84	376.4	337.8	398	380.8	785.3	715.8	733.4	700.4	731.3	725.2	602.3	628.4	376.4	299.6
High	CDP04705	pep chromosome:AUK_PRJEB4211_v1:7:15640849:15644435:1 gene:GSCOC_T00018768001 transcript:CDP04705	MSSSQQHQPPPSLESLKTSERRNEVLNAIHSSLNNCLFETHLDLTVPGLKSKTRGKVRDIYDGGNYLVLVTTDRQSAFDRVLASVPFKGQVLNETSLWWFNKTQHIVPNAVVSAPDKNVTIAKKCSIFPIEFVVRGYVTGSTDTSLWAVYKKGVRNYCGNVLPDGMVKNQKLSENILTPTTKAADHDVPVTPDEIIQCGLMSRADYEEASKRALQLFEYGQHVAMKHGLVLVDTKYEFGKAPDGTVLLVDEVHTPDSSRYWIGHSYQERFWNGLEPENVDKEFLRLWFNDHCNPYEDKVLPDAPEELVSELAWRYIFLFETITDSSFEIPTAKEPIHDRITQNVSQALKSLL	---NA---	0	16.225	16	4	7	1	1	352	39.9	6.06	96	4	0	1.91	2.251	1.178	0.93	1.17	0.24	4.36731e-05	4.06395e-06	0.418759	0.000510341	3.92583e-05	1	173.1	330.6	389.6	4.75	17.55	4.86	160.2	172.6	173.6	179.6	275.6	291.3	375.2	391.9	391.1	361.1	406.2	388.1	160.2	153.1
High	CDO98981	pep chromosome:AUK_PRJEB4211_v1:3:2258942:2263129:-1 gene:GSCOC_T00025975001 transcript:CDO98981	MSGPQCCENAPSLSSGSGAGHVEELGGLQSYVTGSADSEIAVLLVSDVFGYEAPKLRKLADKVAGAGFFVVVPDFFFGDPVLVLEGTDLDAWLKKHGPDQGFEHAKSVIEALKGKGITKVGAAGFCWGAKVVVELATYACIQAAVILHPAFVTLEDIQGVKVPMSILGAETDHTGPPELLRKFGQALDAKPEVDGFVKIFPGVAHGWSVRYKDEDEKEVKAAEEAHQDLLGWLVKYLK	Endo-1,3;1,4-beta-D-glucanase; Flags: Precursor	0	27.964	28	5	13	5	1	238	25.3	5.22	137	5	0	1.908	1.39	0.729	0.93	0.48	-0.46	0.463845	0.902632	0.916916	0.787283	1	1	2642.4	5041.8	3673.3	11.41	18.75	17.1	2405.1	2402	2955.1	2903	4322.7	4198.4	5936.6	5880.6	3170.5	3164.9	4255.8	4281.3	2405.1	2130.6
High	CDP06904	pep chromosome:AUK_PRJEB4211_v1:1:27578684:27581333:-1 gene:GSCOC_T00023946001 transcript:CDP06904	MVLDRSTKSILFLSPSLLTYFLPNLQQNPRRTLFSYSHNFLSIRISWEFLLRQLTMASRMAMRYVSRRFSSSGKVLSEEEKAAENVYIKKIEQEKLEKLARKGPKAEETAAGSGGSGSVADAKPSAQSSSTPGVSTDKYRNYAVVAGAVTLLGAGGWYLLSKDKKAEEVHD	Uncharacterized protein At2g27730, mitochondrial; Flags: Precursor	0	22.557	24	5	8	5	1	171	18.9	9.7	103	5	0	1.906	3.757	1.971	0.93	1.91	0.98	0.0764847	0.000267213	0.0599673	0.186873	0.00121958	0.276605	261	497.4	980.5	31.15	26.67	29.89	191.8	204.1	352.2	333.8	390.8	399.1	642.9	619.8	782.9	737.5	1228	1336.7	191.8	181
High	Q9LHA4	V-type proton ATPase subunit d2 OS=Arabidopsis thaliana OX=3702 GN=VHA-d2 PE=2 SV=1	MYGFEALTFNIHGGYLEAIVRGHRAGLLTTADYNNLCQCENLDDIKMHLSATKYGPYLQNEPSPLHTTTIVEKCTLKLVDDYKHMLCQATEPMSTFLEYIRYGHMIDNVVLIVTGTLHERDVQELIEKCHPLGMFDSIATLAVAQNMRELYRLVLVDTPLAPYFSECLTSEDLDDMNIEIMRNTLYKAYLEDFYNFCQKLGGATAEIMSDLLAFEADRRAVNITINSIGTELTREDRKKLYSNFGLLYPYGHEELAICEDIDQVRGVMEKYPPYQAIFSKMSYGESQMLDKAFYEEEVRRLCLAFEQQFHYAVFFAYMRLREQEIRNLMWISECVAQNQKSRIHDSVVYMF	V-type proton ATPase subunit d2; Short=V-ATPase subunit d2; AltName: Full=Vacuolar H(+)-ATPase subunit d isoform 2; AltName: Full=Vacuolar proton pump subunit d2	0	29.19	13	4	10	3	1	351	40.8	5.11	244	4	1	1.906	0.973	0.51	0.93	-0.04	-0.97	0.611618	0.999996	0.57528	0.959621	1	1	436.8	832.5	424.9	57.42	52.26	39.24	260.5	237.5	749.4	732.3	527.2	493.6	1387	1314.6	278.5	308.6	585.1	603.4	260.5	210.7
High	CDP15370	pep chromosome:AUK_PRJEB4211_v1:6:4204888:4207425:1 gene:GSCOC_T00043076001 transcript:CDP15370	MSCYKGKYTDELIATANYIGTPGKGILAADESTGTIGKRLSSINVENVESNRRALRELLFTTPGALECLSGVILFEETLYQKSAAGKPFVDVLKEGGVIPGIKVDKGTVELPGTNGETTTQGLDGLAQRCQQYYTAGARFAKWRAVLKIGPNEPSQLAINENANGLARYAIICQQNGLVPIVEPEILVDGSHDIEKCADVTERVLAAVYKALNDHHVLLEGTLLKPNMVTPGSEAPKVAPEVIAEYTVRALQRTMPAAVPAVVFLSGGQSEEEATRNLNAMNRLKTKKPWSLTFSFGRALQQSTLKAWAGKEENIPKAQAAFLSRCKANSDATLGKYEGGASLGEGASESLHVKDYKY	Fructose-bisphosphate aldolase 6, cytosolic; Short=AtFBA6; AltName: Full=Cytosolic aldolase 2; Short=cAld2	0	265.781	72	26	93	23	1	358	38.5	7.3	2166	26	3	1.901	1.552	0.816	0.93	0.63	-0.29	0.0426125	0.241662	0.851421	0.113269	0.41273	1	6781.2	12893.2	10522.7	2.61	3.19	1.27	6888.9	6742.8	6819.8	6486.9	13496.2	12864.7	12921.8	12498.5	10407.9	10612.6	10433.6	10680.4	6888.9	5980.9
High	CDP04540	pep chromosome:AUK_PRJEB4211_v1:9:190654:196372:-1 gene:GSCOC_T00017967001 transcript:CDP04540	MAYATTDNSIQPRDVCIVGVARTPMGGFLGSLSSLSATKLGSIAIQSALKRANVDPSLVQEVFFGNVLCANLGQAPARQAALGAGLPYSVICTTINKVCASGMKATMLAAESIQSGTNDVVVAGGMESMSNAPKYLPQARLGSRIGHDTIVDGMLKDGLWDVYNDFGMGVCGELCADQHNISREEQDSYAIRSFERGIAAQKSGAFTWEIAPVKISGVKGKQPLVIDKDEGLGKFDAYKLRKLPPSFKQNGGTVTAGNASIISDGAAALVLVSGEKALKLGLKVIAKIKGYADAAQAPELFTTAPALAIPKAISSSGLEQSQIDYYEINEAFSVVALVNQKLLNIDPEKLNAHGGAVALGHPLGCSGARILITLLGVMREKIGKFGVASVCNGGGGASA…	---NA---	0	21.509	19	4	7	4	1	415	43.2	8.25	116	4	0	1.9	2.811	1.479	0.93	1.49	0.56	0.467289	0.0782609	0.777171	0.792162	0.158076	1	249.3	473.8	700.9	4.79	41.29	43.56	243.9	249.9	271.3	248.7	673.5	665.1	337.5	297.6	1033.2	1025.1	452.1	479.2	243.9	221.7
High	CDP19082	pep chromosome:AUK_PRJEB4211_v1:3:31925186:31934175:1 gene:GSCOC_T00002104001 transcript:CDP19082	MAKDDELGAGAVPEEEGPSETAAADETEEKVEDKVDELTLDGPQEAAKKKKKKSKSKKKKELRVQTDPPSIPVIELFPSGEFPEGEVQQYKNDNLWRTTSEEKRELERLEKPIYNSVRQAAEVHRQVRRYIRQILKPGMLMIDLCETLENTVRKLISENGLQAGIAFPTGCSLNWVAAHWTPNSGDKTVLQYDDVMKLDFGTHIDGHIVDCAFTVAFNPMFNPLLEASREATNTGIKEAGIDVRLCDVGAAIQEVMESYEVEINGKVYQVKSIRNLNGHSIGSYQIHAGKSVPIVKGGEQTKMEEGEFYAIETFGSTGKGYVREDLECSHYMKNFDVGHIPLRLPRAKQLLATINKNFSTLAFCRRYLDRLGETKYLMALKNLCDSGIVQPYPPLCDIK…	Methionine aminopeptidase 2A; Short=MAP 2A; Short=MetAP 2A; AltName: Full=Peptidase M	0	16.975	19	3	13	3	1	426	47.8	5.8	103	3	0	1.899	1.87	0.985	0.93	0.9	-0.02	0.914633	0.925788	1	1	1	1	92.4	175.5	172.8	91.78	83	81.67	30	31.8	271.9	268.6	71.4	71.2	439.8	431.5	72.1	69.9	414.1	414.2	30	28.2
High	CDO97386	pep chromosome:AUK_PRJEB4211_v1:2:18617767:18621029:-1 gene:GSCOC_T00014713001 transcript:CDO97386 description:Beta-ureidopropionase [Source:Projected from Arabidopsis thaliana (AT5G64370) UniProtKB/Swiss-Prot;Acc:Q8H183]	MESNGEKAVVSSSENGKSETETTESSSKDGSICGFDSLHHLLQESLSPPLFQEVSRLLLGLNCGKSLETIALPEPARALSSKHDFDLQAYSFRADKESLRGPRLVRVGLVQNGIALPTTAPFSDQKRAIFQKLTPIIEAAGASGVNIICLQEAWMMPFAFCTREKRWCEFAEPIDGESTEFLQEFARKYNMVIINPILERDIKHGETLWNTAVIIGNHGNIIGKHRKNHIPRVGDFNESTYYMEGNTGHPVFETAYGKIAVNICYGRHHPLNWLAFGLNGAEIVFNPSATVGELSEPMWPIEARNAAIANSYFVGSINRVGTEVFPNPFTSGDGKPQHADFGHFYGSSHFSAPDASCTPSLSRYKDGLMVSDLDLNLCRQLKDKWGFRMTARYEMYSYL…	Beta-ureidopropionase; AltName: Full=N-carbamoyl-beta-alanine amidohydrolase; AltName: Full=Protein PYRIMIDINE 3	0	7.294	7	2	4	2	1	422	47	6.47	43	2	0	1.899	1.545	0.814	0.93	0.63	-0.3	0.029882	0.169543	0.856756	0.0840912	0.302332	1	342.7	650.9	529.6	28.75	3.67	10.06	424.9	445.9	249.9	276.4	645.2	673.3	616.9	656.7	599.5	568.1	493.7	491.8	424.9	395.5
High	CDP21199	pep supercontig:AUK_PRJEB4211_v1:scaffold_2777:10796:13106:1 gene:GSCOC_T00010259001 transcript:CDP21199	MFPFLLLLLSFITFSSQPFSATSDTIYDNFAYCLTRNGIPSNQISKILYSPSNSSFSSVLDAYVRNKRLNTPTTRKPSIIVTPLQVQHIQAAILCTKGTGLQLNIRSGGHDFEGLSYVSDVPFIILDLFNLRSINVDTATETAWVQAGATLGELYYRIWEKSNILGFPAGLCPTVGVGGHISGGGYGSLLRRYGLTVDNVLDAQIIDVNGRVLDRKAMGEDLFWAIRGGGGASFGVVLAYRIRLVRVPEIHTVFNVQKTEAENATDVLYKWQNIADKIDNDLFIRVLVQPITGKVKGQKIIRLTFMGHFLGDANRLISVMNIGFPELGLKRSDCLETSWIDTMLWWYKYKIGTAKEVLLSRAYDQLIFLKRKSDYVQNPIPKDGLVSLFKKMVQLGKTG…	Berberine bridge enzyme-like 21; Short=AtBBE-like 21; Flags: Precursor	0	15.711	13	4	5	3	1	539	60.7	9.36	72	4	1	1.896	0.361	0.191	0.92	-1.47	-2.39	0.766536	0.538705	0.0944656	1	0.803576	0.387269	306.9	581.8	110.8	76.63	92.26	50.25	647.9	678.2	123.6	145.4	1737.5	1710	197.9	187.3	143.7	227.8	83.2	85.5	647.9	601.6
High	CDO97253	pep chromosome:AUK_PRJEB4211_v1:2:17625885:17627662:1 gene:GSCOC_T00014525001 transcript:CDO97253	MSWWWAGAIGAAKKKFEEDDAPPQYQSVALIVGVTGIVGNSLAEILPLADTPGGPWKVYGLARRPRPSWNADHPIHYIQCDISDPQDTQSKLSHLDDITHLFYVTWANRSTELDNCQVNGNMFRNLLSAVIPSSPNLRHICLQTGRKHYLGPFELFGKVGHDPPFHEDLPRLDVQNFYYTLEDILFEEVQKKEGLTWSVHRPGNIFGFSPYSLMNIVGTLCVYAAICKHEGAPLKFPGCREAWDGYSDCSDADLIAEHHIWAAVDPYAKNEAFNVSNGDVFKWKHFWKVLAEQFGAECGEYEGGPLSLKEMMKDKGPVWDEIVREKGLVPTKLEEVGVWWFADVVLQYPCLLDTMNKSKEHGFLGFRNSKNAFISWIDKVKAYKIVP	3-oxo-Delta(4,5)-steroid 5-beta-reductase; AltName: Full=Delta(4)-3-oxosteroid 5-beta-reductase; AltName: Full=Delta-4,5-steroid 5-beta-reductase; Short=At5beta-StR; AltName: Full=Progesterone 5-beta-reductase; Short=5beta-POR	0	25.811	20	4	9	4	1	387	43.8	6.09	117	4	0	1.895	1.466	0.773	0.92	0.55	-0.37	0.00331505	0.0944185	0.43027	0.0132412	0.184735	1	507.2	961.2	743.2	22.68	3.75	3.76	579.7	644.1	392.6	443.7	959.5	906.3	963	992.5	711.9	745.5	780.2	740.9	579.7	571.3
High	CDO99758	pep chromosome:AUK_PRJEB4211_v1:2:9125760:9126476:1 gene:GSCOC_T00029443001 transcript:CDO99758	MAAAAPPPPPSPAAIPETTVPETAPARHPLFARIRLGTIFDVPQLHKLIHQMATYERLTDQFAATEASLASTLFPSPSPPPPFTSFTVFILEVSPDPFPPTPQDPSNFSPILKTFHLDLPIEDSEKEIFRSEIGGDVVVAGFVLFFPNYSTFLAKPGFYIEDLFVREPYRKKGFGRMLFTAVAAQAAKMGYGRVEWVVLDWNVNAIQFYEQMGAKVLPDWRVCRLTGDALEAFAHLNI	Probable acetyltransferase NATA1-like	0	4.908	6	1	2	1	1	238	26.4	5.58	65	1	0	1.891	2.675	1.415	0.92	1.42	0.5	0.153215	0.0155466	0.687219	0.326416	0.0384494	1	171.1	323.6	457.7	42.05	24.87	21.83	115.7	117.6	251.4	249	261	261.5	408.7	400.4	400.5	360.4	576.6	523.1	115.7	104.3
High	CDP06518	pep chromosome:AUK_PRJEB4211_v1:6:1397119:1403795:-1 gene:GSCOC_T00023399001 transcript:CDP06518 description:Protein DEFECTIVE IN EXINE FORMATION 1 [Source:Projected from Arabidopsis thaliana (AT3G09090) UniProtKB/Swiss-Prot;Acc:F4IYM4]	MKIRVLLFLCYLVLFNCYFAGLRSEETKKNKFREREATDDAVAYPNLDESELLNTQCPQHLELRWQTEVSSSIYATPLIADINSDGKLDVVVPSFVHFLEVLEGSDGDKMPGWPAFHQSTVHSSPFLYDIDKDGVREIGLATYNGEVLFFRVSGYMMSDKLEIPRLKVKKDWYVGLHEDPVDRSHPNVHDDLLIQEALMESITQHNGSSVRANTSNPTTSEAHIEELNSTKSTVAEVQLDKINLSDTPNQKQSNDSQTDPHVQMLNNSIETSLGSGFKKVSNGENASKTSRRLLEDNVSKGSGESVSGSEAKTNEGVHEATVENNGGLEAEADSSFELFRDSDELADEYNYDYDDYVDGNLWGEEEWTEAQHEMLENYVHIDAHVLCTPVIADIDNDGT…	---NA---	0	11.864	3	1	6	1	1	859	95.7	4.98	153	1	0	1.89	2.381	1.26	0.92	1.25	0.33	0.261723	0.0780542	0.933652	0.50578	0.157866	1	19.5	36.8	46.3	46.6	34.27	34.96	14.2	13.1	26.7	34.5	26.1	29.4	46.1	53.9	32.2	35.6	65.4	60.3	14.2	11.6
High	CDP15004	pep chromosome:AUK_PRJEB4211_v1:4:9135162:9152764:-1 gene:GSCOC_T00042531001 transcript:CDP15004 description:4-coumarate--CoA ligase-like 9 [Source:Projected from Arabidopsis thaliana (AT5G63380) UniProtKB/Swiss-Prot;Acc:Q84P23]	MAKAPKIDPRNGFCSETKIFHSLRPPVPLPPPSEPISITDHTRSLLHASTTPTTPFLIDSATDHRISYADFLNQVQSLSLSLQSHFPSLSQNDVAFIFCPPSLHVPVLYFSLLSLGIIVSPANPLSSTSELTHMLQLTKPSIVFTTSSLCHKFPETLKSINSVFVDQPQFQSMLSDTTTGSGVVVIHQNDSAAILYSSGTTGRVKGVELSHRTLIAVIAGLYHNKHKADGEDENPLFPFDFENMLEAIEKYKVTYMPVAPPLVVAFAKSDLVNKYDLSSLRLLACGGAPLGKEVSESFTARFPIGYGMTETGGAATRMIGTEEIKKHGSTGRLSEHTEAKIVDPDTKEALPPGQRGELWLRGPIIMKGYVGDSQATAETLDSEGWLKTGDLCYFDSDGF…	4-coumarate--CoA ligase-like 9; AltName: Full=4-coumarate--CoA ligase isoform 4; Short=At4CL4	0	25.557	7	3	6	3	1	514	56.1	6.77	235	3	0	1.889	2.633	1.394	0.92	1.4	0.48	0.984148	0.927139	0.998454	1	1	1	104.5	197.4	275.3	103.34	105.59	104.56	448.3	440.7	24.8	24.5	963.2	891.4	40.7	43.7	1204.8	1289	62.3	62.9	448.3	390.9
High	CDP09175	pep chromosome:AUK_PRJEB4211_v1:1:32225058:32230520:1 gene:GSCOC_T00028395001 transcript:CDP09175	METLPLQHRPFPSTSGSGFLRSIPSGYKTISIATSNTSRLLPALKCSTITPSPFVDQSARFKEAAKHGNLIPLYRPIFSDHLTPVLAYRCLVREDDREAPSFLFESVEPGLKVSSVGRFSVIGAQPTMEIVAKENMVTVMDHRRGQRVEQFEEDPMIVPRRIMEKWKPQRIEELPEAFCGGWVGYFSYDTVRYVEKKKLPFSNAPVDDRNLPDVHLGLYDDVIVFDHVEKKAYVIHWVRLDEFYSVEEAYNDGMNRLEALVSRVHNIVPPRLAAGSINLYTSLFGLSLKNSSMSSEDYEKAVLQAKEHILAGDIFQIVLSQRFERRTFADPFEVYRALRIVNPSPYMTYLQARGSILVGSSPEILTRVKKRTITNRPLAGTIRRGKTPKEDYMLETQLL…	---NA---	0	34.013	21	8	13	8	1	584	65.7	7.06	112	8	0	1.889	1.695	0.897	0.92	0.76	-0.16	0.0180376	0.0718562	0.939455	0.0547654	0.146641	1	901.9	1703.7	1528.8	30.2	23.9	17.01	1163.7	1190.7	680	699	2273.3	2018.5	1418.6	1438.1	1802.5	1733	1348.6	1287.5	1163.7	1056.2
High	CDP13911	pep chromosome:AUK_PRJEB4211_v1:2:4289489:4291649:1 gene:GSCOC_T00039050001 transcript:CDP13911	MCIPTAFGDYGGWQSAHATFYGGGDASGTMGGACGYGNLYSQGYGTDTAALSTALFNNGLACGSCYEIRCDSDPQACLPGTITVTATNFCPPNPALPNDNGGWCNPPRQHFDLAEPAFLQIAQYRAGIVPVSFQRVPCSKKGGVRYTINGHSYFNLVLVTNVAGAGDVHTVAIKGSRTGWQSMSRNWGQNWQSNSYLNGQTLSFQITTSDGRTLTSYNVAPANWQFGQTFEGGQF	Expansin-A4; AltName: Full=Alpha-expansin-4; AltName: Full=OsEXP4; AltName: Full=OsEXPA4; AltName: Full=OsaEXPa1.22; Flags: Precursor	0	34.708	49	5	14	4	1	235	25	6.86	266	5	1	1.888	1.875	0.993	0.92	0.91	-0.01	0.0698681	0.0864706	0.999951	0.173893	0.171705	1	582	1099	1091	10.75	4.84	3.35	531.3	534.3	649.2	633.9	1130.3	1066.5	1178.3	1068.5	1087.8	1115.1	1030.5	1094.2	531.3	473.9
High	CDP15913	pep chromosome:AUK_PRJEB4211_v1:5:22855720:22860477:-1 gene:GSCOC_T00016826001 transcript:CDP15913	MEKEKKPDEKEEIEEAIELILFQVSECYVYLIPPRKSAASYRADEWNVNKWAWEGALKVISKGEECIIRLEDKTTGELYARAFLRDGEPHPVEPVIDSSRYFVLRVEENIGGRLRHAFIGIGFRERPEAYDFQAALHDHMKYLNKKKTAEEMEQQHQHTSSVDYSLKEGEKLVLQIKNKSGRSSGSKFFEQGLNDLSLEEKGSKKEPVISIKPPPAPLSPVVSPKTSPSELPSKLSLKESSAAEDSVSPQEQSKELEPPENQNTQDIPDDDFGDFQAAG	Uncharacterized protein At1g03900	0	7.152	5	1	2	1	1	279	31.5	5.12	48	1	0	1.888	0.991	0.525	0.92	-0.01	-0.93	0.768291	1	0.763606	1	1	1	168.8	318.6	167.2	72.27	71.32	69.18	83.3	75.1	341.9	346	158.3	149.6	641.5	660.1	86.5	78.1	323.3	332.4	83.3	66.6
High	CDP20247	pep supercontig:AUK_PRJEB4211_v1:scaffold_1033:17637:41225:1 gene:GSCOC_T00012625001 transcript:CDP20247	MECASNIRLPVINLTEEILRSGKDSWTEARNIVTRAFEEYGCFIAVHDKYPSEVSDSLFSELQDLFNLPLEIKVQNTSQTPLSGYARPRPNVNLYESMCIEDATNLEAVEKFANQMWPSKNNHFCELFHCYANQVAELDKMVSKLVFESYGVEKYHESHVGSVTYNVRFIRYRVPEQNEMNVGVAPHTDKNFITILQQNETDGLEVQLKNGSWIPIDFPPSSVVIMAGDVFSAWSNGRVHSPFHRVTMKGRGTRYSIAQFSYCKKLVKTPTELVDDEHPLLYKPFDCFGYLRFLSTNEDWNIPNSLKVYCGV	Probable 2-oxoglutarate-dependent dioxygenase AOP1.2	0	9.871	7	2	4	1	1	312	35.8	5.8	126	2	1	1.884	1.187	0.63	0.91	0.25	-0.67	0.137994	0.923179	0.457576	0.303191	1	1	129.3	243.5	153.5	35.02	20.91	20.19	170.3	172.4	85.8	98.2	277.4	296.8	189.1	213.8	173.8	192.8	135.6	125.6	170.3	152.9
High	CDP01315	pep chromosome:AUK_PRJEB4211_v1:10:3598440:3600999:-1 gene:GSCOC_T00034915001 transcript:CDP01315	MGLTETVSFLFLVWFLSSSHILGALAERSIYIVHIDKSLMPKVFASHIYWYTSMIDSIGNVGQTSDHGFAPKILYTYDAAFHGFSALMSKDHLQALKKSPGFVSAHPDRSPTIDTTHTPDFLSLNTATGLWPASDYGKDVIIGVVDDGIWPENPSFKDDGMTPIPPRWKGSCQEGQEFNSSLCNLKLIGAKYFNKAVLAANPNLNLSMNSARTTSGHGTHVAGTAAGNYVEGVSFFGYGSGTARGIAPRARLAAYKVLWDEGSYEADVLAGIDQAVADGVDVISISLGFDFTPPYEEPISIASFGAMEKGIFVSTSAGNRGPDLGTVHNDIPWALTVAAGSVDRKFSGSLVLGNGLTIIGWSMFPARALVKDLPIIYNQTISACDSTESLLTVTDIGRS…	---NA---	0	23.405	8	4	7	4	1	764	81.8	6.87	131	4	0	1.884	1.08	0.573	0.91	0.11	-0.8	0.490122	0.999904	0.570094	0.821993	1	1	349.4	658.5	377.4	44.72	56.42	51.42	575.6	503.4	242.6	240.3	1181.8	1088.2	385.4	398.5	599.3	625.5	237.7	233.1	575.6	446.5
High	CDP13663	pep chromosome:AUK_PRJEB4211_v1:5:28335484:28341938:-1 gene:GSCOC_T00038687001 transcript:CDP13663	MKITVMTADEQILTLDVDRDESVENLKALLEVETQVPLQQQQLLYNGTEMRNAEKLSGLGVGDGDLVMMVSNANALSSSRPTNDSGFNPDGSAVNPSAFQQHLRNDSNIMAQLFQNDPELAQVLLGNDLDRLQDLLRVRHRQRAELQRQQDEELALLHADPFDVEAQKRIEAAIRQKGIDENWAAALEQNPEGFARVVMLYVDMEVNGVPLKAFVDSGAQSTIISKSCAERCGLLRLLDTRYRGIAHGVGQSEILGRIHVAPIKIGNIFYPCSFLVLDAPNMEFLFGLDMLRKHQCMIDLKENVLRVGGGEVSVPFLHEKDIPSTFLDEGTQVKEASSSGAQASSGNTEKDNTPKRGPSGGSQGNLTQGQDFEAKVAKLVELGFGREAVIQALKFFDGN…	---NA---	0	48.737	31	8	19	8	1	410	44.9	4.94	434	8	0	1.883	1.721	0.914	0.91	0.78	-0.13	4.47581e-07	2.94294e-06	0.658334	2.0264e-05	3.05861e-05	1	991.5	1867.1	1706.8	9	5.96	6.31	1045	1110.5	917.5	940.8	1974.9	1959.1	1779.4	1769.5	1847.3	1764.9	1609.4	1650.7	1045	985
High	CDO97733	pep chromosome:AUK_PRJEB4211_v1:4:133057:138678:1 gene:GSCOC_T00021613001 transcript:CDO97733	MDDAMESGNLGPYQDRPRIFPNMRTKPYTPLIFRVIKRINVRILFVLLLLGLGAIFYIGASTSPIIVFVFSVCIISFVLSMYLTKWVLAKDEGPPEMVQISDAIRDGAEGFFRTQYGTISKMAVLLAVIILSIYMFRSTTPQQESSGLGRSMSAYVTVVSFLLGALCSGIAGYVGMWVSVRANVRVSSAARRSAREALQIAVRAGGFSAMVVVGLAVIGVAVLYSTLYVWLEVDSPGSMKVTDLPLLLVGYGFGASFVALFAQLGGGIYTKAADVGADLVGKVEQGIPEDDPRNPAVIADLVGDNVGDCAARGADLFESIAAEIISAMILGGTMAQRCKIEGM	Pyrophosphate-energized membrane proton pump 2; AltName: Full=AVP1-like protein 1; AltName: Full=Pyrophosphate-energized inorganic pyrophosphatase 2; Short=H(+)-PPase 2; AltName: Full=Vacuolar proton pyrophosphatase 2	0	15.052	12	3	8	2	1	343	36.6	6.73	150	3	0	1.882	2.117	1.125	0.91	1.08	0.17	0.0643173	0.0216959	0.973898	0.161908	0.0512666	1	45	84.7	95.3	4.56	16.82	12.27	43.8	45.2	48.6	44.8	68.3	87.9	102.8	81.6	100.1	82.5	109.7	90.8	43.8	40.1
High	CDO99782	pep chromosome:AUK_PRJEB4211_v1:2:8921300:8927337:1 gene:GSCOC_T00029472001 transcript:CDO99782	MATSIRLRRLGTVALAAGGAYTILRDPSISVNDRGGGSALQIVKQKIADPFAVIPCRAVQESALMGASLANPLDVLVVGGGATGSGVALDAATRGLRVGLVEREDFSSGTSSRSTKLVHGGVRYLEKAVFNLDYGQLKLVFHALEERKQVIDNAPHLCHALPCMTPCFDWFELIYYWMGLKMYDLVAGRHLLHVSRYYSAQESLELFPTLARNGKEKTLKGTVVYYDGQMNDSRLNVAIACSAALAGAAVLNHAEVVSLLKDDVTGRIIGARIRNNLSGKEFDTYAKVVVNAAGPFCDSVRQMADKKAKPMIIPSSGVHIVLPDYYSPEGMGLIVPKTKDGRVVFMLPWLGRTVAGTTDSNTSITMLPEPHENEIEFILDAISGYLNVKVRRTDVLSAW…	Glycerol-3-phosphate dehydrogenase SDP6, mitochondrial; AltName: Full=Protein SUGAR-DEPENDENT 6; Flags: Precursor	0	50.119	21	8	19	8	1	628	68.8	8.78	333	8	0	1.881	2.086	1.109	0.91	1.06	0.15	1.16264e-06	1.56332e-07	0.556572	4.42076e-05	2.72903e-06	1	1070.7	2014.3	2233.8	9.16	8.12	0.42	992.2	983.2	1160.1	1155.4	2189.5	2117.3	1916.4	1842.6	2237.8	2221.9	2243.5	2229.8	992.2	872.1
High	CDP03831	pep chromosome:AUK_PRJEB4211_v1:1:34739421:34751250:-1 gene:GSCOC_T00016323001 transcript:CDP03831 description:CLIP-associated protein [Source:Projected from Arabidopsis thaliana (AT2G20190) UniProtKB/Swiss-Prot;Acc:Q8RWY6]	MEEALELARAKDTKERMAAVERLHQLLEASRKSLSSSEVTSLVDTCLDLLKDNNFRVSQGALQALASAAVLSGEHLKLHFNALVPAAVERLGDAKQPVRDAARRLLLTLMEVSSPTIIVERAGSYAWTHKSWRVREEFARTVTSAIGLFASTELPLQRAILPPILHMLNDPNPAVREAAILCIEEMYNQIGPQFRDELQRQNLPATMVKDINARLERIEPKARSADGLVSNYAASEIKSANLSTKKSSPKAKSSTREVSLFGGDGDVTEKPVEPIKVYSEKELVREFEKIASTLIPDKDWSIRIAAMQRVEGLVIGGATDYPCFRVLLKQLVGPLSTQLSDRRSSIVKQACHLLSFLSKELLGDFDACAEMFIPMLFKLVVITVLVIAESADNCIKTML…	CLIP-associated protein; Short=AtCLASP	0	4.444	1	1	2	1	1	1437	158	7.3	35	1	0	1.881	1.47	0.781	0.91	0.56	-0.36	0.349364	0.823007	0.907696	0.640556	1	1	90.2	169.7	132.6	37.31	6.87	10.73	65.1	68.3	119.1	137.5	168	165.9	171.4	191.9	142.6	116.2	144.7	123.3	65.1	60.6
High	CDP07114	pep chromosome:AUK_PRJEB4211_v1:1:29866456:29871701:1 gene:GSCOC_T00024232001 transcript:CDP07114 description:Protein disulfide-isomerase [Source:Projected from Arabidopsis thaliana (AT5G60640) UniProtKB/TrEMBL;Acc:A0A178UQB2]	MPNRLFILLSLTCLLLFSSLLTPVLSKTPAPSDADDDEDLSFLEADDGDDDDAAYDDFEIPSNFDHGDGEENDDVELGPKVDEKDVVVLNEGNFSDFIESNKYAMVEFYAPWCGHCKALAPEYAAAATELKNLEGEKVALAKVDATEQHELAEQYEVQGFPTVFFFADGEHKPYTGQRSKDAIVTWIKKKIGPGVGNITTVDDAERILTSEDKVVLGFLNSLVGSESQELAAASKLDDGVNFYQTVNPNVAKLFHIEPDMKRPALVLLKKVAEKVTLFDGQFTKSAIVEFVSANKLPLVTTFTRESAPLIFESPIKKQLLLFATSSDSGKVVPTFQEAAKDFKGKLIFVYVEMDNEDTGRPVADYFGIEGNASKVLGFLGNDDAKKYIFDGEITLEKIK…	Protein disulfide isomerase-like 1-4; Short=OsPDIL1-4; AltName: Full=Protein disulfide isomerase-like 2-1; Short=OsPDIL2-1; Flags: Precursor	0	58.014	20	9	20	6	1	568	62.5	4.83	473	9	0	1.88	2.348	1.249	0.91	1.23	0.32	0.0362453	0.00416287	0.79314	0.0982216	0.0120229	1	820.5	1542.5	1926.7	17.89	25.84	28.07	953.6	970.8	702.6	706	1989.9	1894.4	1256	1214.1	2506.2	2423.5	1531.7	1474.1	953.6	861.1
High	CDP15869	pep chromosome:AUK_PRJEB4211_v1:5:22396956:22402495:-1 gene:GSCOC_T00016767001 transcript:CDP15869	MAPAQDPNSTGGSSAGATKDEASLKVPSKDLKKKDDKKDEDLSEEDLALKLQLELYVERVQDSDPGLQKVALESMRQEIRNATSSMTSVPKPLKFLRPHYGTLKAYYESMVDSDLKKLLADILSVLALTMSAEGERESLKYRLLGSDGDIGSWGHEYVRNLAGEIAQEYTKRQSEDAPFDELMELVQQIVAFHMQHNAEPEAVDLLMEVEDLDLLVEHTDKTNFKRTCLYLNSSAKYLPGPDDNLVLDIAYMIYMKFEEFPRALQIALYLDNMQYVKQIFTTCHDLLLKKQFCYILARHGITFELDEEMCADDEEREGLQEIINNAKLSEGYLTLARDIEVMEPKSPEDIYKAHLLDGRASAGASMDSARQNLAATFVNAFVNAGFGQDKLMTVASEAS…	26S proteasome non-ATPase regulatory subunit 2 homolog A; AltName: Full=26S proteasome regulatory subunit RPN1a; Short=AtRPN1a; AltName: Full=26S proteasome regulatory subunit S2 homolog A	0	29.711	21	8	13	8	1	591	65.1	4.89	210	8	0	1.88	1.941	1.032	0.91	0.96	0.05	0.184293	0.148311	0.999923	0.381134	0.270902	1	607.3	1141.8	1178.7	31.71	41.67	37.37	454.9	462.6	797.4	814	805.9	756.9	1701.5	1617.9	843.6	842.2	1646.8	1652.2	454.9	410.3
High	CDP07601	pep chromosome:AUK_PRJEB4211_v1:10:2778338:2782055:1 gene:GSCOC_T00024907001 transcript:CDP07601	MALMEGILDVQVVPLGTAVAVAVVLGGLSLLVLKAFVNAQRRKSSSNLPLVPEVPGLPLLGNLLQLKEKKPHRTFARFAETYGPIYSIKTGANKIVVLNSNDVAKEAMVTRYSSISSRKLSKALTILTAGKSIIAMSDYDEYYKMAKKHILNSTLGTNAQKRHRAHRDALTENICNKLHTSLNENPLEAVNFRNIYLFELFSLALKEVLGEDVESTFVEEFGTTLSKEELLKVLVHDPMEGALEVDWRDFFPFLRWIPNKSFEDKIHQMDLRRGAVTKALIKKQKKRFESGQEIYCYLDSILSDEKSFTEKQIMMLIWEAIIETSDTTLVTAEWAMYELAKDPVKQDRLFRDIKNVCGPNKVTEENLGQLPYLSAIFHETLRRHSPVPVVPLRYVHEDT…	---NA---	0	29.276	19	7	12	4	1	514	58.2	7.8	281	7	2	1.88	1.67	0.888	0.91	0.74	-0.17	0.0330971	0.0993256	0.973438	0.0914987	0.192692	1	700.6	1317.4	1170.3	12.4	18.35	26.77	765.8	791.1	641	617.5	1578.8	1520.8	1112.5	1141.2	1466.1	1516.4	934.3	927.6	765.8	701.7
High	CDP06656	pep chromosome:AUK_PRJEB4211_v1:6:2405597:2409728:-1 gene:GSCOC_T00023578001 transcript:CDP06656	MAIAAAKLLPAAAAVSKGRSLSSPCSVSYSTLYRLSSSSSSSPSSAALQLDSLTFVVSSKFRNPSSLRICSAASSSSMRIQAPPEITSPASFLERKESGILHFVKYQGLGNDFILVDNRDSHEPRITPEQAVKLCDRNFGIGADGVIFAMPGINGTDYTMRIFNSDGSEPEMCGNGIRCFARFIAELENLQGKQSFTIHTGAGLIVPEIQEDGQVRVDMGEPILKASDVPTKLQPNKGQSVVKSKLEVDGVSWNVTCVSMGNPHCVTFGTEVSKNLQVDELDLAEIGPKFEHHVTFPARTNTEFVQVFSPTHLKMRVWERGAGATLACGTGACAVVVAAVLEGHAGRSCTVDLPGGPLEIEWREENNHIYMTGPAEVVFYGSVPL	Diaminopimelate epimerase, chloroplastic; Short=DAP epimerase; Flags: Precursor	0	21.03	19	4	6	4	1	385	41.2	6.13	103	4	0	1.879	1.92	1.021	0.91	0.94	0.03	0.00189317	0.00155223	0.999963	0.00853155	0.00516867	1	393.9	740.3	756.2	7.89	13.9	12.67	391.3	447.6	373.7	396.6	847	831.5	659.2	659.1	851.2	831.3	688	664.4	391.3	397
High	Q9LK65	Putative DUF21 domain-containing protein At3g13070, chloroplastic OS=Arabidopsis thaliana OX=3702 GN=CBSDUFCH1 PE=4 SV=1	MMGMALELSVLGRSVIDSKTLNLKRYGQKSKLSGRFLPRAELHCPVALSSSKHSNLSFRFRRSCEFSYRSRFMLFSSSQCHEGSQRKSDSGEKELESIKVLLKRGIVIGALVCGVFLYGCQKVLASAGVVEAGYEVFGQSVVLFKNALPKIYQVLTVLREQGLILAALLSLSAFFSMAETSITTLWPWKVRELAEKEPENGVFRMLRSDVTRFLTTILIGTTVVNIAATALVTEAATAIFGEAGVSAATGLMTVAILLLTEITPKSVAVHNAQEVARIVVRPVAWLSLVLYPVGRIVTYLSMGILKILGLKGRSEPYVTEDELKLMLRGAELSGAIEEEEQDMIENVLEIKDTHVREVMTPLVDVVAIDASASLVDFHSMWVTHQYSRVPVFEQRIDNI…	Putative DUF21 domain-containing protein At3g13070, chloroplastic; AltName: Full=CBS domain-containing protein CBSDUFCH1; Flags: Precursor	0	5.245	2	1	2	1	1	661	73.7	5.07	82	1	0	1.878	2.123	1.131	0.91	1.09	0.18	0.00330017	0.00130606	0.981587	0.0131885	0.00447589	1	39.8	74.7	84.5	10.7	14.1	17.98	36	40.2	46.4	39.4	71.8	67.6	92.6	77.7	65.5	79	90.4	100.5	36	35.7
High	CDP06553	pep chromosome:AUK_PRJEB4211_v1:6:1626890:1628410:-1 gene:GSCOC_T00023444001 transcript:CDP06553	MEEVKLFGHPASPFSCRVEIALKLKGVHYDFIAEDPSNKSPQLLQYNPVHKKIPVLLHNGKPIAESLVILEYIDEVWKTNPILPQNPHEKAKARFWANYVEEKCLPALFKTFWSVGEQYDKDKAEAGEVLKFLEDELQGKKFFGGDSIGLVDIVANFMAFWFRTIQEALGLDVLTKDNFPKLWEWAENYVNCSDINQFLPPKDKLIAIFPPPYMGQHLVAFFQSRLAAAAAAK	Probable glutathione S-transferase; AltName: Full=G2-4; AltName: Full=Heat shock protein 26A	0	12.187	8	3	5	3	1	233	26.6	6.3	104	3	0	1.874	2.403	1.282	0.91	1.26	0.36	0.00895001	0.000530463	0.546312	0.030313	0.00214513	1	374.4	701.6	899.4	25.09	11.22	6.63	305	298	476.8	459.5	757.2	795.8	650.1	633.6	945.5	959.7	844.1	855.6	305	264.3
High	CDP09013	pep chromosome:AUK_PRJEB4211_v1:1:31074528:31076807:1 gene:GSCOC_T00028181001 transcript:CDP09013	MAVHDDCKLKFLELKAKRTYRFIVFKIEEKQKQVIVEKVGEPGQSYEDFAASLPADECRYAVFDFDFVTAENCQKSRIFFIAWSPDTSKVRSKMIYASSKDRFKRELDGIQVELQATDPTEMGLDVFKSRAN	Actin-depolymerizing factor 2; Short=ADF-2	0	13.082	30	3	7	1	1	132	15.3	7.09	99	3	0	1.874	1.868	0.997	0.91	0.9	0	0.102789	0.126485	0.999943	0.237715	0.236721	1	107.4	201.2	200.6	26.38	18.3	23.39	80.3	88.6	130.1	137.3	257.5	168.2	191.7	211.1	169.5	155.1	237.4	249.4	80.3	78.6
[truncated: 2,103 more rows]
[truncated: 34 more columns]
