# Supplementary material for: Differences in the Abundance of Auxin Homeostasis Proteins Suggest Their Central Roles for In Vitro Tissue Differentiation in Coffea arabica
Source: Plants (Basel). 2021 Nov 27;10(12):2607. doi: 10.3390/plants10122607 (PMC8708889; doi:10.3390/plants10122607)
Supplement: Supplementary file 1 [file plants-10-02607-s001.zip › Table S3.xlsx]

## Sheet: Hoja1
Table S3. Selected sequences for phylogenetic analysis.
Specie	Protein family	ID	mRNA ID	Protein ID
Arabidopsis thaliana	GH3	AT2G14960	NM_127059.3	NP_179101.1
		AT4G37390	NM_119902.4	NP_195455.1
		AT2G23170	NM_127881.3	NP_179898.1
		AT1G59500	NM_104643.1	NP_176159.1
		AT4G27260	NM_118860.5	NP_194456.1
		AT5G54510	NM_124831.3	NP_200262.1
		AT1G28130	NM_102578.4	NP_174134.1
		AT5G51470	NM_124526.2	NP_199960.1
		AT2G47750	NM_130342.3	NP_182296.1
		AT4G03400	NM_001340446.1	NP_001319858.1
		AT2G46370	NM_180122.4	NP_850453.1
		AT5G13320	NM_121335.4	NP_196836.1
		AT5G13350	NM_001343270.1	NP_001318554.1
		AT5G13360	NM_001203372.2	NP_001190301.1
		AT5G13370	NM_121340.3	NP_196841.2
		AT5G13360	NM_001203372.2	NP_001190301.1
		AT1G28130	NM_102578.4	NP_174134.1
		AT1G48670	NM_001333347.1	NP_001321105.1
		AT1G48660	NM_001333346.1	NP_001322825.1
Solanum lycopersicum	GH3	101251833	XM_004231843.4	XP_004231891.1
		101246970	NM_001321687.1	NP_001308616.1
		101268544	XM_004233398.3	XP_004233446.1
		101251833	XM_004231843.4	XP_004231891.1
		101251682	XM_004240036.4	XP_004240084.1
		101262636	XM_004244120.4	XP_004244168.1
		101258198	XM_010328855.3	XP_010327157.1
		101258277	XM_004243271.4	XP_004243319.1
		101262636	XM_004244120.4	XP_004244168.1
		101258495	NM_001368308.1	NP_001355237.1
		101258495	XM_004248101.4	XP_004248149.1
		1262663	XM_004248029.4	XP_004248077.1
		101262357	XM_004248028.3	XP_004248076.1
		101266841	XM_004243380.4	XP_004243428.1
		101264094	XM_004251437.4	XP_004251485.1
Oryza sativa	GH3	NC_029256.1	XM_015762657.1	XP_015618143.1
		NC_029256.1	XM_015787988.1	XP_015643474.1
		NC_029260.1	XM_015782624.1	XP_015638110.1
		NC_029262.1	XM_015790552.1	XP_015646038.1
		NC_029262.1	XM_015790835.1	XP_015646321.1
		NC_029262.1	XM_015792311.1	XP_015647797.1
		NC_029262.1	XM_015792333.1	XP_015647819.1
		NC_029266.1	XM_015760301.1	XP_015615787.1
		LOC4343704
		LOC_O38860
		LOC4344247
		LOC107275638
		Os11g0528700
Arabidopsis thaliana	ILR1	AT3G02875	NM_001337440.1	NP_001325526.1
		AT5G56650	NM_001345211.1	NP_001332665.1
		AT5G56660	NM_125049.3	NP_200477.1
		AT5G54140	NM_124794.3	NP_200225.1
		AT1G51760	NM_104055.4	NP_175587.1
		AT1G51780	NM_104057.1	NP_175589.1
		AT1G44350	NM_103546.4	NP_175086.1
Oryza sativa	ILR1	OSNPB_010560000	XM_015766297.1	XP_015621783.1
		OSNPB_010706900	XM_015768847.2	XP_015624333.1
		OSNPB_030836800	XM_015773443.2	XP_015628929.1
		OSNPB_040521800	XM_015780885.2	XP_015636371.1
		OSNPB_010917300	XM_015776151.2	XP_015631637.1
		OSNPB_070249700	XM_015792387.1	XP_015647873.1
		OSNPB_070249800	XM_015790315.2	XP_015645801.1
		OSNPB_060691400	XM_015785503.2	XP_015640989.1
Solanum lycopersicum	ILR1	LOC101267174	XM_019216147.2	XP_019071692.1
		LOC101264404	XM_004251605.4	XP_004251653.1
		LOC101264129	XM_004241011.4	XP_004241059.1
		LOC101254822	XM_004228599.4	XP_004228647.1
		LOC101266415	XM_004238668.4	XP_004238716.1
		LOC101249161	XM_004235576.4	XP_004235624.1
Arabidopsis thaliana	ABCB	AT4G25960	NM_118729.4	NP_194326.2
		AT2G36910	NM_129247.3	NP_181228.1
		AT4G01820	NM_116412.2	NP_192091.1
		AT2G47000	NM_130268.4	NP_182223.1
		AT4G01830	NM_001340339.1	NP_001329375.1
		AT2G39480	NM_129506.2	NP_181480.1
		AT5G46540	NM_124024.2	NP_199466.1
		AT4G18050	NM_001341257.1	NP_001328203.1
		AT1G10680	NM_001331921.1	NP_001320481.1
		AT3G55320	NM_115390.3	NP_191092.1
		AT1G02520	NM_100133.3	NP_171753.1
		AT1G02530	NM_001331344.1	NP_001320752.1
		AT1G27940	NM_102559.2	NP_174115.1
		AT1G28010	NM_102566.3	NP_174122.1
		AT3G28345	NM_113754.3	NP_189475.1
		AT3G28360	NM_113756.5	NP_189477.4
		AT3G28390	NM_113759.1	NP_189480.1
		AT3G28380	NM_113758.2	NP_189479.1
		AT3G28860	NM_113807.3	NP_189528.1
		AT3G28415	NM_148757.1	NP_683599.1
		AT3G62150	NM_001340142.1	NP_001327193.1
Oryza sativa	ABCB	OSNPB_080564300	XM_015794906.2	XP_015650392.1
		OSNPB_020693700	XM_015768291.2	XP_015623777.1
		OSNPB_010290700	XM_015756580.2	XP_015612066.1
		OSNPB_050548500	XM_015782329.2	XP_015637815.1
		OSNPB_010534700	XM_015786358.2	XP_015641844.1
		OSNPB_030181675	XM_026024189.1	XP_025879974.1
		OSNPB_020323000	XM_015771498.2	XP_015626984.1
		OSNPB_030280000	XM_015775083.2	XP_015630569.1
		OSNPB_010911300	XM_015758160.2	XP_015613646.1
		OSNPB_010723800	XM_015758719.2	XP_015614205.1
Solanum lycopersicum	ABCB	NC_015444.2	XM_004243033.1	XP_004243081.1
		NC_015446.2	XM_004246576.3	XP_004246624.1
		NC_015442.2	XM_004239442.1	XP_004239490.1
		NC_015448.2	XM_004251332.3	XP_004251380.1
		NC_015449.2	XM_004253109.3	XP_004253157.2
		NC_015443.2	XM_010323557.2	XP_010321859.1
		NC_015439.2	NM_001247280.1	NP_001234209.1
		NC_015444.2	XM_004244308.3	XP_004244356.1
		NC_015448.2	XM_010315050.2	XP_010313352.1
		NC_015440.2	XM_010319878.2	XP_010318180.1
		NC_015449.2	XM_019211312.1	XP_019066857.1
		NC_015439.2	XM_004232205.3	XP_004232253.1
The sequences of the proteins GH3, ILR1 and ABCB of C. arabica used for the phylogenetic trees were obtained in this study.
